# Supplementary material
Source: Research Square preprint supplement (doi:10.21203/rs.3.rs-9165159/v1)
Supplement: Supplementary file 1 [file 0ed7aa3a7a5fcc46f9854593.xlsx]

## Sheet: sTable 1
Supplementary Table 1. Clinical characteristics of the cohort (Ctrl, g-BMF, and u-BMF).
ID	Group	Gender	at the age of diagnosis	at the age of BM sample collection	Etiology	Familial history	Extrahematopoietic abnormality	Bone marrow cellularity	Cytogenetics	Chromosome breakage test	Presence of PNH clone	Hg (g/dl)	WBC (x109/L)	ANC (x109/L)	ALC (x109/L)	ARC (x109/L)	PLT (x109/L)	Treatment	Outcome	Gene	cDNA	AA change	Zygosity
G1	g-BMF	M	1	3	Fanconi anemia	None	Cafe-au-lait spot, Hypopigmentation, Hoarse shoe kidney	20%	46,XY[20]	Not tested	Not tested	8.3	4.71	1.2717	3.0615	31.5	20	HSCT	Alive at	FANCG	c.307+1G>C	-	Homozygous
G2	g-BMF	F	5	7	Fanconi anemia	None	Cafe au lait spot, short stature	<5%	46,XX[20]	Increased (2.17 aberrations/cell)	Not tested	11	3.28	1.148	1.9352	73.9	87	awaiting for donor	Alive at	FANCD2, BRCA2	c.3817C>T, c.5795_5799del	p.(Arg1273*) -	heterozygous, heterozygous
G3	g-BMF	M	7	8	Fanconi anemia	None	Cafe au lait spot, short stature	<5%	46,XY[20]	Not tested	Not tested	7.7	4.27	0.3416	3.8857	39.2	21	HSCT	Expired	FANCA	c.3520_3522del, c.4168-2A>G	- -	heterozygous, heterozygous
G4	g-BMF	M	7	11	Dyskeratosis congenita	None	None	<5%	46,XY[20]	Not tested	Not detected	9.2	4.34	1.9964	1.9964	84	15	HSCT	Alive at	TERT	c.1892G>A	p.(Arg631Gln)	heterozygous
U1	u-BMF	F	7	8	idiopathic	None	short stature, dermatitis	30%	46,XX[20]	Not tested	Not tested	9.4	2.7	0.702	1.809	100.7	46	Monitoring	Alive at	Not detected
U2	u-BMF	F	3	11	idiopathic	None	None	10%	46,XX[20]	With in normal range	Not detected	8.4	3.16	0.9796	2.0856	79.4	12	HSCT	Alive at	Not detected
U3	u-BMF	M	5	17	idiopathic	Sibling- pletelat function abnormality	hypodontia	5%	46,XY[20]	With in normal range	Not detected	8.9	2.59	1.0101	1.3468	59.3	19	HSCT	Alive at	Not detected
U4	u-BMF	F	6	15	idiopathic	None	None	5%	46,XX[20]	With in normal range	Not detected	7.6	2.51	0.7279	1.6817	49.5	38	HSCT	Alive at	Not detected
U5	u-BMF	M	2	3	idiopathic	aunt - thrombocytopenia	None	10%	46,XY[20]	Not tested	Not tested	9.8	6.45	1.6125	4.386	66.5	51	Monitoring	Alive at	Not detected
U6	u-BMF	M	8	8	idiopathic	sibling-thrombocytopenia, macrocytosis	None	20%	Not tested	Not tested	Not tested	9.4	4.35	1.1745	3.0015	68.6	24	Monitoring	Alive at	Not detected
U7	u-BMF	M	14	18	idiopathic	None	None	<5%	46,XY[12]	With in normal range	Not detected	8.6	4.09	0.6135	6.88	47.3	16	HSCT	Alive at	Not detected
U8	u-BMF	M	11	11	idiopathic	None	None	5%	46,XY[20]	With in normal range	Not detected	12.4	3.37	1.2132	1.9209	87.1	84	Monitoring	Alive at	Not detected
C1	Control	M		1				40%	46,XY[20]			8.2	11.16	4.0176	6.3612	143.2	390
C2	Control	M		1				60%	46,XY[20]			8.6	6.11	1.19756	4.11814	223.5	120
Abbreviations: Ctrl, control; g-BMF, genetically defined bone marrow failure; u-BMF, genetically undefined bone marrow failure; BM, bone marrow; Hb, hemoglobin; ANC, absolute neutrophil count; PLT, platelet; MCV, mean corpuscular volume; HSCT, hematopoietic stem cell transplantation.

## Sheet: sTable 2
Supplementary Table 2. Differentially expressed mRNAs between g-BMF and u-BMF.
EnsemblID	GeneSymbol	GeneName	GeneType	EntrezID	baseMean	log2FoldChange	lfcSE	stat	pvalue	padj	significance	gene_type	Sample-wise CPM values
													G1	G2	G3	G4	U1	U2	U3	U4	U5	U6	U7	U8
ENSG00000173349.6	SFT2D3	SFT2D3	mRNA	84826	41.2947	-21.6071	3.46073	-6.24351	4.27872e-10	2.97536e-06	Downregulated	protein_coding	0	0	0	0	0	0	0	0	0	0	12.5767	8.97652
ENSG00000196778.4	OR52K1	OR52K1	mRNA	390036	21.1015	3.10909	0.70182	4.43004	9.42159e-06	0.0257059	Upregulated	protein_coding	0.488843	1.47581	4.67755	1.05584	0.41419	0.0723785	0.346771	0	0.19326	0.377426	0	0.162353
ENSG00000254402.7	LRRC24	LRRC24	mRNA	441381	18.1022	-21.412	3.46117	-6.18636	6.15712e-10	2.97536e-06	Downregulated	protein_coding	0	0	0	0	0	0	0	0	0	0	3.16099	3.81295
ENSG00000261408.7	TEN1-CDK3	TEN1-CDK3	mRNA	100529145	13.5965	-4.65502	1.04872	-4.43876	9.04791e-06	0.0257059	Downregulated	protein_coding	0.0611054	0	0	0.0319952	0.0955823	0.651407	0.658866	0.399117	0.93409	0.712915	0.130655	0.816828
Differential expression analysis was performed using DESeq2. Genes were considered significant at FDR < 0.05 and |log2FC| > 1.0.
Abbreviations: g-BMF, genetically defined bone marrow failure; u-BMF, genetically undefined bone marrow failure; log2FC, log2 fold change; FDR, false discovery rate.

## Sheet: sTable 3
Supplementary Table 3. Differentially expressed lncRNAs between g-BMF and u-BMF.
EnsemblID	GeneSymbol	GeneName	GeneType	EntrezID	baseMean	log2FoldChange	lfcSE	stat	pvalue	padj	significance	gene_type	Sample-wise CPM values
													G1	G2	G3	G4	U1	U2	U3	U4	U5	U6	U7	U8	Control 1	Control 2
ENSG00000260519.2	lnc-GABRB1-22	lnc-GABRB1-22	lncRNA	Unknown	9.21224	-5.57612	1.18198	-4.71761	2.38637e-06	0.00813871	Downregulated	lncRNA	0	0	0	0.0319952	0.446051	0.579028	0.762897	0.565416	0.90188	0.587106	0.401624	0.396432	0.464036	0.322426
ENSG00000230470.1	lnc-XPR1-26	lnc-XPR1-26	lncRNA	Unknown	26.4746	-5.22865	1.10674	-4.72439	2.30811e-06	0.00813871	Downregulated	lncRNA	0	0	0	0.127981	0.477911	3.72749	3.01691	1.19735	0.6442	0.251617	3.1706	0.504746	0.0608048	0.00272904
ENSG00000289145.1	ENSG00000289145	ENSG00000289145	lncRNA	Unknown	34.7486	-21.6183	3.46076	-6.24669	4.1923e-10	2.97536e-06	Downregulated	lncRNA	0	0	0	0	0	0	0	0	0	0	4.42422	5.07369	6.99541	3.11505
ENSG00000275527.1	lnc-PKM-65	lnc-PKM-65	lncRNA	Unknown	285.136	-22.8879	3.45994	-6.6151	3.71295e-11	1.01304e-06	Downregulated	lncRNA	0	0	0	0	0	0	0	0	0	0	16.4541	83.911	50.5494	79.0334
Differential expression analysis was performed using DESeq2. lncRNAs were considered significant at FDR < 0.05 and |log2FC| > 1.0.
Abbreviations: g-BMF, genetically defined bone marrow failure; u-BMF, genetically undefined bone marrow failure; lncRNA, long non-coding RNA; log2FC, log2 fold change; FDR, false discovery rate.

## Sheet: sTable 4
Supplementary Table 4. Differentially expressed mRNAs in g-BMF compared with Ctrl.
EnsemblID	baseMean	log2FoldChange	lfcSE	stat	pvalue	padj	significance	gene_type
ENSG00000003509.16	493.728	1.05372	0.378227	2.78595	0.00533711	0.0384461	Upregulated	protein_coding
ENSG00000003987.14	68.1519	9.19249	1.96305	4.68275	2.8305e-06	0.000146326	Upregulated	protein_coding
ENSG00000004478.8	831.774	-1.60565	0.574294	-2.79586	0.00517612	0.0375838	Downregulated	protein_coding
ENSG00000004777.19	335.801	-3.94506	1.27068	-3.10468	0.00190487	0.018852	Downregulated	protein_coding
ENSG00000005206.17	863.778	-2.64932	0.895295	-2.95917	0.00308474	0.0265669	Downregulated	protein_coding
ENSG00000005469.12	201.294	1.64204	0.525265	3.12612	0.00177128	0.0179201	Upregulated	protein_coding
ENSG00000005700.15	1407.1	6.34511	1.34164	4.72936	2.25225e-06	0.000124064	Upregulated	protein_coding
ENSG00000006016.12	20.8735	5.25396	1.78443	2.94433	0.00323653	0.0274464	Upregulated	protein_coding
ENSG00000006118.15	66.8678	5.07963	1.07387	4.73022	2.24273e-06	0.000123962	Upregulated	protein_coding
ENSG00000006453.14	57.5487	3.90999	0.929761	4.20537	2.6066e-05	0.000778538	Upregulated	protein_coding
ENSG00000006530.18	639.642	2.14359	0.544398	3.93755	8.23191e-05	0.00182843	Upregulated	protein_coding
ENSG00000006740.18	20.0822	3.15951	1.1837	2.66919	0.00760347	0.0486803	Upregulated	protein_coding
ENSG00000006831.10	1404.72	7.41302	1.29411	5.72827	1.01461e-08	2.67502e-06	Upregulated	protein_coding
ENSG00000007129.18	198.245	6.01443	1.40552	4.27914	1.87614e-05	0.000609167	Upregulated	protein_coding
ENSG00000007341.19	918.205	1.73531	0.623267	2.78421	0.0053658	0.0385475	Upregulated	protein_coding
ENSG00000007541.17	2689.68	-3.48038	1.10563	-3.14788	0.00164458	0.0169256	Downregulated	protein_coding
ENSG00000007545.16	467.164	-1.74888	0.625705	-2.79506	0.00518901	0.0376467	Downregulated	protein_coding
ENSG00000007968.7	7846.13	8.80858	1.47894	5.956	2.58481e-09	1.14561e-06	Upregulated	protein_coding
ENSG00000008226.20	174.624	2.63184	0.609937	4.31494	1.59643e-05	0.000541	Upregulated	protein_coding
ENSG00000008323.16	45.5826	4.67421	1.24233	3.76247	0.000168247	0.00311943	Upregulated	protein_coding
ENSG00000008838.21	1033.18	-2.16772	0.657064	-3.2991	0.000969962	0.0116879	Downregulated	protein_coding
ENSG00000008988.11	17838.9	1.90903	0.693891	2.75119	0.00593787	0.0413393	Upregulated	protein_coding
ENSG00000009724.18	175.745	7.01649	1.50316	4.66782	3.04406e-06	0.000154044	Upregulated	protein_coding
ENSG00000011009.11	414.276	-2.26641	0.677094	-3.34726	0.000816137	0.0103053	Downregulated	protein_coding
ENSG00000011114.15	828.473	6.11038	1.14802	5.32254	1.02327e-07	1.27257e-05	Upregulated	protein_coding
ENSG00000011243.19	3783.46	-1.62659	0.60222	-2.70099	0.00691335	0.0457045	Downregulated	protein_coding
ENSG00000011304.22	3970.17	-1.70101	0.588211	-2.89184	0.00382991	0.030608	Downregulated	protein_coding
ENSG00000011638.11	105.506	1.69961	0.628527	2.70411	0.00684878	0.0454444	Upregulated	protein_coding
ENSG00000012779.12	2533.7	6.79322	1.46425	4.63939	3.49433e-06	0.000170924	Upregulated	protein_coding
ENSG00000012963.15	509.573	7.70955	1.5785	4.88411	1.03898e-06	6.60064e-05	Upregulated	protein_coding
ENSG00000013275.8	886.097	9.19684	1.54224	5.96329	2.47211e-09	1.14561e-06	Upregulated	protein_coding
ENSG00000013561.18	10581.8	1.89716	0.652454	2.90773	0.00364061	0.0296249	Upregulated	protein_coding
ENSG00000013583.10	676.425	-3.11269	0.873525	-3.56337	0.000366131	0.00572198	Downregulated	protein_coding
ENSG00000013810.21	1971.22	-1.98493	0.689858	-2.87731	0.00401086	0.0316432	Downregulated	protein_coding
ENSG00000014138.10	247.451	-1.82253	0.515646	-3.53447	0.000408594	0.00625585	Downregulated	protein_coding
ENSG00000014216.16	2240.04	-1.63646	0.596014	-2.74568	0.00603857	0.0418415	Downregulated	protein_coding
ENSG00000019102.12	19.7424	5.78665	1.58677	3.64681	0.000265519	0.00447596	Upregulated	protein_coding
ENSG00000020426.11	397.077	1.14061	0.388321	2.93728	0.00331106	0.027819	Upregulated	protein_coding
ENSG00000022556.16	114.934	9.7973	2.1146	4.63316	3.60127e-06	0.00017518	Upregulated	protein_coding
ENSG00000023191.17	1146.67	5.03636	1.47073	3.42439	0.000616192	0.00842193	Upregulated	protein_coding
ENSG00000023228.14	2173.62	5.28101	1.12959	4.67517	2.93715e-06	0.000150074	Upregulated	protein_coding
ENSG00000030066.14	1501.14	3.65988	0.889751	4.11337	3.89921e-05	0.00105223	Upregulated	protein_coding
ENSG00000032742.18	569.531	1.1172	0.418187	2.67153	0.0075506	0.0484713	Upregulated	protein_coding
ENSG00000033122.21	77.0799	3.45287	0.780049	4.42648	9.57822e-06	0.000374118	Upregulated	protein_coding
ENSG00000034053.15	749.673	7.52171	1.03886	7.24035	4.47522e-13	2.15345e-09	Upregulated	protein_coding
ENSG00000034510.6	11332.9	1.92149	0.648392	2.96347	0.00304195	0.0263213	Upregulated	protein_coding
ENSG00000034533.12	369.788	1.53615	0.471503	3.25798	0.00112208	0.0130095	Upregulated	protein_coding
ENSG00000036549.13	1841.13	1.07271	0.396736	2.70384	0.0068544	0.0454632	Upregulated	protein_coding
ENSG00000037637.11	591.896	10.9019	2.05231	5.312	1.08431e-07	1.31741e-05	Upregulated	protein_coding
ENSG00000039523.20	1360.34	-3.08166	0.963693	-3.19776	0.00138497	0.0150505	Downregulated	protein_coding
ENSG00000041515.16	15.9333	5.21567	1.90543	2.73727	0.0061951	0.0425681	Upregulated	protein_coding
ENSG00000042062.13	4086.35	-2.74219	0.853978	-3.21108	0.00132238	0.0145633	Downregulated	protein_coding
ENSG00000042445.14	187.239	6.77308	1.30995	5.1705	2.33465e-07	2.1905e-05	Upregulated	protein_coding
ENSG00000042781.14	13.3989	7.33752	2.37568	3.08859	0.00201108	0.0196233	Upregulated	protein_coding
ENSG00000047365.13	4589.49	1.29921	0.450316	2.88511	0.00391279	0.0311194	Upregulated	protein_coding
ENSG00000048342.18	405.73	6.35338	1.22591	5.1826	2.18809e-07	2.08449e-05	Upregulated	protein_coding
ENSG00000049656.14	1630.83	2.41093	0.770757	3.128	0.00176001	0.0178403	Upregulated	protein_coding
ENSG00000050165.19	34.0781	3.70832	1.37357	2.69977	0.00693883	0.0458272	Upregulated	protein_coding
ENSG00000050327.15	35.5106	4.20395	1.12237	3.74559	0.000179968	0.00329275	Upregulated	protein_coding
ENSG00000050344.9	401.576	2.74748	0.936451	2.93392	0.00334706	0.0279946	Upregulated	protein_coding
ENSG00000053328.9	42.2129	3.69904	0.810413	4.56439	5.00939e-06	0.00022479	Upregulated	protein_coding
ENSG00000053702.15	81.0848	9.56115	1.94133	4.92506	8.43356e-07	5.5867e-05	Upregulated	protein_coding
ENSG00000054282.16	684.147	7.07029	1.20049	5.88949	3.87399e-09	1.48026e-06	Upregulated	protein_coding
ENSG00000054392.13	55.1953	7.10252	1.82839	3.88457	0.000102511	0.00215527	Upregulated	protein_coding
ENSG00000054654.20	16387.5	1.77967	0.579544	3.07082	0.0021347	0.0204437	Upregulated	protein_coding
ENSG00000054690.14	56.0677	3.23123	1.16702	2.76878	0.00562674	0.0398145	Upregulated	protein_coding
ENSG00000055070.17	594.869	5.28523	1.55633	3.39596	0.000683885	0.00907238	Upregulated	protein_coding
ENSG00000055118.17	1817.7	-2.89468	0.91989	-3.14677	0.00165084	0.0169752	Downregulated	protein_coding
ENSG00000055332.19	2244.64	-1.40054	0.363225	-3.85585	0.00011533	0.00235711	Downregulated	protein_coding
ENSG00000055732.13	17.0163	6.00102	2.21056	2.7147	0.00663355	0.0445715	Upregulated	protein_coding
ENSG00000056736.10	36.4757	4.53455	1.18627	3.82254	0.000132083	0.00261646	Upregulated	protein_coding
ENSG00000057757.10	36343.9	2.18975	0.801217	2.73303	0.00627551	0.0429253	Upregulated	protein_coding
ENSG00000058453.17	327.483	6.93168	1.18949	5.82742	5.629e-09	1.87859e-06	Upregulated	protein_coding
ENSG00000058600.16	1395.46	6.19068	1.10359	5.60958	2.02819e-08	4.25829e-06	Upregulated	protein_coding
ENSG00000060069.18	1342.64	1.46403	0.550442	2.65973	0.00782024	0.0496462	Upregulated	protein_coding
ENSG00000062485.19	1580.87	-1.53291	0.494298	-3.10119	0.00192745	0.0190398	Downregulated	protein_coding
ENSG00000062822.16	873.684	-1.59369	0.588077	-2.71001	0.00672816	0.0450536	Downregulated	protein_coding
ENSG00000063015.21	53.1499	6.84867	1.88034	3.64225	0.000270266	0.00452991	Upregulated	protein_coding
ENSG00000063244.14	1925.63	-1.45356	0.516138	-2.81623	0.00485909	0.0360602	Downregulated	protein_coding
ENSG00000063761.16	146.769	-1.84559	0.679924	-2.7144	0.00663951	0.0445918	Downregulated	protein_coding
ENSG00000064601.21	892.743	-2.26043	0.585631	-3.85982	0.000113472	0.00232816	Downregulated	protein_coding
ENSG00000064932.16	981.111	2.15911	0.703575	3.06877	0.00214939	0.0205396	Upregulated	protein_coding
ENSG00000064961.19	513.732	-1.79467	0.60843	-2.94966	0.0031812	0.0270905	Downregulated	protein_coding
ENSG00000065413.20	7998.51	1.26023	0.440309	2.86215	0.00420782	0.0327448	Upregulated	protein_coding
ENSG00000065621.15	219.889	3.62914	1.09624	3.31055	0.000931124	0.0113684	Upregulated	protein_coding
ENSG00000065675.16	1317.66	1.77503	0.582392	3.04783	0.00230504	0.0215943	Upregulated	protein_coding
ENSG00000065978.19	39917.7	1.8223	0.685942	2.65664	0.00789245	0.0499411	Upregulated	protein_coding
ENSG00000066044.15	1162.43	-1.27604	0.424446	-3.00637	0.00264389	0.0237781	Downregulated	protein_coding
ENSG00000066379.15	235.517	10.8335	2.11258	5.12811	2.92663e-07	2.52985e-05	Upregulated	protein_coding
ENSG00000066405.13	18.7341	7.299	2.57444	2.83518	0.00458003	0.0347689	Upregulated	protein_coding
ENSG00000066735.16	588.141	-3.64349	1.36589	-2.66749	0.00764201	0.0488305	Downregulated	protein_coding
ENSG00000067113.17	92.7057	1.49495	0.469039	3.18725	0.00143631	0.0153874	Upregulated	protein_coding
ENSG00000068120.15	495.41	-2.05281	0.608028	-3.37618	0.000734998	0.00957051	Downregulated	protein_coding
ENSG00000068137.15	244.701	-5.02522	1.11751	-4.49682	6.89783e-06	0.000292146	Downregulated	protein_coding
ENSG00000068308.15	1033.05	10.6252	1.92085	5.5315	3.17509e-08	5.65616e-06	Upregulated	protein_coding
ENSG00000068323.17	599.664	12.6465	2.20919	5.7245	1.03737e-08	2.6814e-06	Upregulated	protein_coding
ENSG00000068394.11	470.603	11.87	2.18605	5.4299	5.63843e-08	8.44644e-06	Upregulated	protein_coding
ENSG00000068400.14	854.651	8.53882	1.5193	5.62023	1.90706e-08	4.05482e-06	Upregulated	protein_coding
ENSG00000068903.21	351.179	11.5505	2.08615	5.53676	3.08123e-08	5.56415e-06	Upregulated	protein_coding
ENSG00000068985.5	16.865	5.29664	1.6601	3.19056	0.00141995	0.015277	Upregulated	protein_coding
ENSG00000069345.12	4050.34	1.63547	0.607304	2.69299	0.00708138	0.046402	Upregulated	protein_coding
ENSG00000070018.9	172.54	9.60924	1.91979	5.00535	5.57608e-07	4.07034e-05	Upregulated	protein_coding
ENSG00000070047.13	896.932	4.91369	0.981773	5.00491	5.58871e-07	4.07034e-05	Upregulated	protein_coding
ENSG00000070087.15	71.9857	2.76441	0.63942	4.3233	1.53713e-05	0.000531146	Upregulated	protein_coding
ENSG00000070731.11	38.1873	1.32715	0.495024	2.68098	0.00734066	0.0474819	Upregulated	protein_coding
ENSG00000071073.13	3580.73	2.19501	0.727144	3.01868	0.00253881	0.0231399	Upregulated	protein_coding
ENSG00000071082.11	16150.1	2.60276	0.75517	3.44659	0.00056772	0.00794476	Upregulated	protein_coding
ENSG00000071564.19	3936.77	-2.85384	0.939921	-3.03625	0.00239541	0.0221597	Downregulated	protein_coding
ENSG00000071894.17	487.21	10.269	2.06199	4.98014	6.35394e-07	4.46724e-05	Upregulated	protein_coding
ENSG00000072062.16	257.125	3.99424	1.22408	3.26305	0.00110218	0.0128353	Upregulated	protein_coding
ENSG00000072071.17	163.083	6.13017	1.27501	4.80793	1.52502e-06	9.11727e-05	Upregulated	protein_coding
ENSG00000072134.16	645.101	-2.83612	0.816787	-3.47229	0.00051604	0.00741438	Downregulated	protein_coding
ENSG00000072310.18	1189.73	-2.55754	0.790011	-3.23736	0.00120643	0.0137042	Downregulated	protein_coding
ENSG00000072315.4	71.3847	9.19087	2.32157	3.9589	7.52967e-05	0.00172303	Upregulated	protein_coding
ENSG00000072818.12	1838.27	10.4696	1.71888	6.09094	1.12248e-09	6.88234e-07	Upregulated	protein_coding
ENSG00000072864.16	1145.26	8.74343	1.4225	6.14654	7.91904e-10	5.9653e-07	Upregulated	protein_coding
ENSG00000073060.17	242.787	-2.41419	0.853613	-2.8282	0.00468104	0.0353121	Downregulated	protein_coding
ENSG00000073969.19	651.578	5.6751	1.25591	4.51872	6.22132e-06	0.000267142	Upregulated	protein_coding
ENSG00000074201.9	1795.54	1.2086	0.4192	2.8831	0.00393783	0.0312713	Upregulated	protein_coding
ENSG00000074416.16	232.627	-2.45498	0.722988	-3.3956	0.000684795	0.00907723	Downregulated	protein_coding
ENSG00000074621.14	465.644	2.54415	0.803715	3.16548	0.00154827	0.0162005	Upregulated	protein_coding
ENSG00000074660.17	174.791	7.7878	1.79513	4.33829	1.43594e-05	0.00050422	Upregulated	protein_coding
ENSG00000074966.11	1493.44	2.81608	0.750771	3.75092	0.00017619	0.00323486	Upregulated	protein_coding
ENSG00000075218.19	417.404	-3.26742	0.962887	-3.39336	0.000690416	0.00913338	Downregulated	protein_coding
ENSG00000075290.8	12.4331	5.50479	1.92439	2.86053	0.00422932	0.0328635	Upregulated	protein_coding
ENSG00000075568.17	1824.43	6.95313	1.65009	4.2138	2.51113e-05	0.000760561	Upregulated	protein_coding
ENSG00000075618.18	206.157	-2.58653	0.741127	-3.48999	0.000483039	0.00707948	Downregulated	protein_coding
ENSG00000075702.19	452.717	-3.13433	0.931475	-3.36492	0.000765672	0.00984249	Downregulated	protein_coding
ENSG00000075790.12	29.5154	3.96046	1.39932	2.83027	0.00465091	0.0351706	Upregulated	protein_coding
ENSG00000075884.14	4151.37	1.50387	0.45465	3.30774	0.00094051	0.0114534	Upregulated	protein_coding
ENSG00000076108.12	4976.97	-2.20751	0.760998	-2.90081	0.00372201	0.0300922	Downregulated	protein_coding
ENSG00000077092.20	82.147	5.64721	1.33582	4.22753	2.36273e-05	0.000727727	Upregulated	protein_coding
ENSG00000077312.9	458.322	-2.6528	0.813117	-3.26251	0.0011043	0.0128486	Downregulated	protein_coding
ENSG00000077380.16	867.599	8.71523	1.52686	5.70794	1.14352e-08	2.81765e-06	Upregulated	protein_coding
ENSG00000077616.11	40.646	8.48179	2.05045	4.13654	3.52575e-05	0.000970317	Upregulated	protein_coding
ENSG00000077721.17	597.351	6.68063	1.30583	5.11601	3.12071e-07	2.68005e-05	Upregulated	protein_coding
ENSG00000078795.17	60.0355	6.67013	1.77129	3.76569	0.000166089	0.00309684	Upregulated	protein_coding
ENSG00000078814.19	54.833	3.95365	1.19191	3.31709	0.000909615	0.0111766	Upregulated	protein_coding
ENSG00000078902.16	251.008	7.28416	1.39585	5.21843	1.80448e-07	1.82828e-05	Upregulated	protein_coding
ENSG00000079313.15	1103.87	-3.1844	1.1574	-2.75133	0.00593538	0.0413329	Downregulated	protein_coding
ENSG00000079459.14	1905.9	3.93011	1.15902	3.3909	0.000696644	0.0091973	Upregulated	protein_coding
ENSG00000079462.8	131.752	-2.32795	0.71804	-3.24209	0.00118657	0.0135311	Downregulated	protein_coding
ENSG00000081052.14	154.991	2.87599	0.715905	4.01727	5.88757e-05	0.00142409	Upregulated	protein_coding
ENSG00000081181.8	293.128	-3.90772	1.06583	-3.66637	0.00024602	0.00424219	Downregulated	protein_coding
ENSG00000081237.21	26329.5	2.43585	0.625494	3.89429	9.8488e-05	0.00208231	Upregulated	protein_coding
ENSG00000081923.15	177.604	5.36122	1.32044	4.06016	4.90381e-05	0.00123721	Upregulated	protein_coding
ENSG00000082175.16	9.00905	4.58901	1.71395	2.67745	0.00741851	0.0477978	Upregulated	protein_coding
ENSG00000082996.20	1983.19	1.22185	0.44782	2.72844	0.00636353	0.043252	Upregulated	protein_coding
ENSG00000083535.16	1135.12	1.42635	0.461698	3.08935	0.00200595	0.0195878	Upregulated	protein_coding
ENSG00000083896.13	2444.07	4.74636	1.2419	3.82187	0.000132444	0.00261958	Upregulated	protein_coding
ENSG00000085117.12	822.445	-1.42144	0.446035	-3.18684	0.00143835	0.0153967	Downregulated	protein_coding
ENSG00000085231.14	141.642	9.94948	2.11385	4.70681	2.5162e-06	0.000134291	Upregulated	protein_coding
ENSG00000085415.16	740.248	-1.09098	0.377132	-2.89283	0.00381782	0.0305651	Downregulated	protein_coding
ENSG00000085491.17	577.116	4.65977	1.38479	3.36495	0.000765565	0.00984249	Upregulated	protein_coding
ENSG00000085721.13	806.157	4.90832	0.992484	4.94549	7.59518e-07	5.12378e-05	Upregulated	protein_coding
ENSG00000085733.16	460.706	3.77051	1.34428	2.80486	0.00503389	0.0368356	Upregulated	protein_coding
ENSG00000085872.15	442.983	-3.38165	0.890471	-3.7976	0.000146106	0.00280388	Downregulated	protein_coding
ENSG00000085978.22	1225.01	12.9766	2.5442	5.10045	3.38847e-07	2.86496e-05	Upregulated	protein_coding
ENSG00000085982.16	426.31	1.40892	0.484273	2.90935	0.00362186	0.0295491	Upregulated	protein_coding
ENSG00000085999.13	227.422	-2.84297	0.912037	-3.11717	0.00182597	0.0182969	Downregulated	protein_coding
ENSG00000086570.13	51.7793	7.08127	1.94728	3.63649	0.000276375	0.00460887	Upregulated	protein_coding
ENSG00000086696.11	6.30619	6.7555	2.33911	2.88807	0.00387616	0.0308373	Upregulated	protein_coding
ENSG00000087085.16	1080.36	-3.99153	1.10693	-3.60596	0.000311002	0.0050521	Downregulated	protein_coding
ENSG00000087087.20	1498.62	-1.8294	0.673733	-2.71532	0.00662121	0.0445213	Downregulated	protein_coding
ENSG00000088053.11	60.9087	8.88344	2.11229	4.20561	2.60383e-05	0.000778538	Upregulated	protein_coding
ENSG00000088179.9	6116.47	1.68021	0.569367	2.95101	0.00316733	0.0270151	Upregulated	protein_coding
ENSG00000088247.19	2056.85	-2.48965	0.678109	-3.67145	0.000241175	0.00417503	Downregulated	protein_coding
ENSG00000088256.9	210.488	-2.7556	0.979817	-2.81236	0.00491791	0.0362687	Downregulated	protein_coding
ENSG00000088280.20	77.771	9.44674	2.07333	4.55631	5.20612e-06	0.000231076	Upregulated	protein_coding
ENSG00000088305.19	164.119	-2.71918	1.00536	-2.70469	0.00683672	0.0453916	Downregulated	protein_coding
ENSG00000088387.22	1584.76	1.65233	0.50733	3.25692	0.0011263	0.0130497	Upregulated	protein_coding
ENSG00000088827.14	291.932	-3.59253	1.14327	-3.14232	0.00167613	0.0171515	Downregulated	protein_coding
ENSG00000089486.17	127.542	2.31209	0.825737	2.80003	0.00510975	0.037253	Upregulated	protein_coding
ENSG00000089597.18	2521.83	-1.53191	0.542782	-2.82234	0.00476745	0.0357085	Downregulated	protein_coding
ENSG00000089723.10	106.188	8.36026	2.00288	4.17413	2.9913e-05	0.000855377	Upregulated	protein_coding
ENSG00000089737.19	2781.56	7.84119	1.32331	5.92543	3.11474e-09	1.26339e-06	Upregulated	protein_coding
ENSG00000090061.17	1251.24	-1.76729	0.641995	-2.75281	0.00590869	0.0412079	Downregulated	protein_coding
ENSG00000090372.15	982.38	-2.25683	0.757951	-2.97754	0.00290576	0.0255028	Downregulated	protein_coding
ENSG00000090565.17	304.818	2.51704	0.699394	3.59889	0.000319577	0.00513759	Upregulated	protein_coding
ENSG00000090857.14	940.096	-1.90755	0.698655	-2.73031	0.00632739	0.0431175	Downregulated	protein_coding
ENSG00000090905.19	1668.77	4.59418	0.923902	4.97258	6.60677e-07	4.60814e-05	Upregulated	protein_coding
ENSG00000091129.22	176.808	2.38662	0.660348	3.61418	0.0003013	0.00492179	Upregulated	protein_coding
ENSG00000091136.15	384.942	3.17245	0.907255	3.49675	0.000470959	0.00696791	Upregulated	protein_coding
ENSG00000091138.13	19.4519	6.12245	2.08078	2.94239	0.00325693	0.0275133	Upregulated	protein_coding
ENSG00000091262.17	53.9693	5.53437	1.4535	3.80761	0.000140318	0.00272977	Upregulated	protein_coding
ENSG00000091409.16	2364.8	2.00717	0.738812	2.71675	0.00659257	0.0443854	Upregulated	protein_coding
ENSG00000091831.25	169.011	2.41192	0.672404	3.58702	0.000334483	0.00534462	Upregulated	protein_coding
ENSG00000091844.8	29.0062	5.71307	1.41391	4.04062	5.33107e-05	0.00131482	Upregulated	protein_coding
ENSG00000091879.14	95.6651	4.9069	1.30679	3.75494	0.000173383	0.00319444	Upregulated	protein_coding
ENSG00000092010.15	3134.89	8.53497	1.46386	5.83046	5.52749e-09	1.86836e-06	Upregulated	protein_coding
ENSG00000092094.11	653.29	5.81037	1.12216	5.17783	2.24487e-07	2.129e-05	Upregulated	protein_coding
ENSG00000092098.18	47.2496	5.73712	1.78676	3.21091	0.00132317	0.0145659	Upregulated	protein_coding
ENSG00000092200.13	60.0105	3.04854	0.647506	4.70813	2.49998e-06	0.000133968	Upregulated	protein_coding
ENSG00000092295.12	18.5975	6.02298	2.00273	3.00739	0.00263503	0.0237188	Upregulated	protein_coding
ENSG00000092330.19	996.501	6.69876	1.16494	5.75031	8.90799e-09	2.55282e-06	Upregulated	protein_coding
ENSG00000092841.19	19439.6	2.14806	0.748724	2.86896	0.00411824	0.0322092	Upregulated	protein_coding
ENSG00000092871.17	1478.9	-1.9557	0.615087	-3.17954	0.00147508	0.0156329	Downregulated	protein_coding
ENSG00000094914.14	236.51	5.13401	1.2737	4.03078	5.5593e-05	0.00135714	Upregulated	protein_coding
ENSG00000094916.16	3543.99	-1.936	0.657866	-2.94284	0.00325213	0.0274989	Downregulated	protein_coding
ENSG00000095110.9	46.978	8.77046	2.01181	4.35948	1.30372e-05	0.000468291	Upregulated	protein_coding
ENSG00000095464.10	13.9553	7.02669	2.14539	3.27526	0.00105566	0.012392	Upregulated	protein_coding
ENSG00000095637.23	645.282	-1.92015	0.697379	-2.75338	0.0058983	0.0412079	Downregulated	protein_coding
ENSG00000096070.19	1016.44	-1.97862	0.717614	-2.75722	0.00582944	0.0408654	Downregulated	protein_coding
ENSG00000096746.18	1611.69	-1.53583	0.537558	-2.85705	0.00427594	0.0331379	Downregulated	protein_coding
ENSG00000096872.17	960.961	2.01251	0.594816	3.38341	0.000715904	0.00938394	Upregulated	protein_coding
ENSG00000099139.14	381.182	1.48783	0.389269	3.82213	0.000132306	0.0026188	Upregulated	protein_coding
ENSG00000099381.20	830.021	-2.87815	1.03419	-2.78299	0.00538608	0.0386721	Downregulated	protein_coding
ENSG00000099624.8	353.25	-2.71673	0.961737	-2.82482	0.00473075	0.0355751	Downregulated	protein_coding
ENSG00000099834.19	76.9308	8.963	2.01075	4.45755	8.29036e-06	0.000334725	Upregulated	protein_coding
ENSG00000099849.15	155.733	3.62351	0.872867	4.15128	3.30625e-05	0.000926348	Upregulated	protein_coding
ENSG00000099875.16	7305.65	-2.71728	0.798135	-3.40453	0.00066277	0.00886552	Downregulated	protein_coding
ENSG00000099889.14	330.706	-2.44624	0.759449	-3.22107	0.00127715	0.0142136	Downregulated	protein_coding
ENSG00000099937.11	53.41	8.27891	2.05297	4.03265	5.51522e-05	0.00135013	Upregulated	protein_coding
ENSG00000099953.10	23.9363	7.77278	2.22299	3.49654	0.000471341	0.00696966	Upregulated	protein_coding
ENSG00000099956.20	409.499	11.3907	2.10346	5.4152	6.12208e-08	8.91907e-06	Upregulated	protein_coding
ENSG00000099958.15	13.6718	7.11375	2.47509	2.87413	0.00405139	0.0318565	Upregulated	protein_coding
ENSG00000099977.16	24.3184	7.73757	2.0754	3.72824	0.000192823	0.00347728	Upregulated	protein_coding
ENSG00000100012.12	146	4.3451	1.3895	3.12709	0.00176548	0.0178751	Upregulated	protein_coding
ENSG00000100038.20	147.259	-4.70463	1.09211	-4.30785	1.64848e-05	0.000552953	Downregulated	protein_coding
ENSG00000100075.10	233.89	-1.52437	0.572244	-2.66385	0.00772525	0.0492224	Downregulated	protein_coding
ENSG00000100084.14	371.137	-1.35705	0.501761	-2.70457	0.00683919	0.0453966	Downregulated	protein_coding
ENSG00000100099.22	2298.83	-1.44813	0.498519	-2.90487	0.00367408	0.0298328	Downregulated	protein_coding
ENSG00000100124.15	187.798	-1.61535	0.514612	-3.13897	0.00169542	0.0173053	Downregulated	protein_coding
ENSG00000100146.20	11.4628	6.69418	2.44106	2.74233	0.00610055	0.0421491	Upregulated	protein_coding
ENSG00000100156.12	7.9307	6.22691	2.22573	2.79769	0.00514689	0.0374338	Upregulated	protein_coding
ENSG00000100196.11	178.084	7.6959	1.52676	5.04066	4.63924e-07	3.544e-05	Upregulated	protein_coding
ENSG00000100197.23	49.3414	6.35943	1.76269	3.60779	0.000308818	0.00501973	Upregulated	protein_coding
ENSG00000100206.11	520.797	2.6539	0.876305	3.02852	0.00245759	0.0225764	Upregulated	protein_coding
ENSG00000100207.21	1640.65	4.30486	0.838401	5.13461	2.82733e-07	2.46829e-05	Upregulated	protein_coding
ENSG00000100243.22	1139.14	-2.89839	0.948559	-3.05558	0.00224628	0.0212384	Downregulated	protein_coding
ENSG00000100281.14	578.108	-1.49702	0.466563	-3.20861	0.0013338	0.0146515	Downregulated	protein_coding
ENSG00000100304.13	795.391	-2.36436	0.689608	-3.42855	0.000606811	0.00833259	Downregulated	protein_coding
ENSG00000100320.24	45.1628	4.95668	1.57175	3.15361	0.00161265	0.0166932	Upregulated	protein_coding
ENSG00000100321.15	349.76	-2.50755	0.644456	-3.89096	9.9848e-05	0.00210768	Downregulated	protein_coding
ENSG00000100330.16	2534.83	-3.55644	0.81587	-4.35908	1.30611e-05	0.000468383	Downregulated	protein_coding
ENSG00000100348.10	376.675	-2.61427	0.79166	-3.30226	0.000959076	0.0116204	Downregulated	protein_coding
ENSG00000100350.16	142.983	-3.91376	1.16724	-3.35301	0.000799385	0.0101611	Downregulated	protein_coding
ENSG00000100393.15	10178.6	-1.41511	0.514889	-2.74837	0.00598921	0.0415869	Downregulated	protein_coding
ENSG00000100401.21	1605.7	-1.68016	0.627098	-2.67926	0.00737856	0.0476453	Downregulated	protein_coding
ENSG00000100427.16	322.268	-2.29667	0.705791	-3.25404	0.00113777	0.0131509	Downregulated	protein_coding
ENSG00000100429.18	72.2185	-3.13083	1.03851	-3.01473	0.00257204	0.0233191	Downregulated	protein_coding
ENSG00000100439.11	593.565	-2.43075	0.682626	-3.56089	0.000369601	0.00575918	Downregulated	protein_coding
ENSG00000100442.11	1576.3	2.08691	0.695329	3.00133	0.00268807	0.0240812	Upregulated	protein_coding
ENSG00000100503.27	7115.96	1.20465	0.453434	2.65673	0.00789017	0.0499411	Upregulated	protein_coding
ENSG00000100604.13	20.536	7.64781	2.30894	3.31226	0.000925462	0.0113172	Upregulated	protein_coding
ENSG00000100605.17	576.14	3.27104	1.01963	3.20808	0.00133624	0.0146608	Upregulated	protein_coding
ENSG00000100628.12	20.1428	6.00989	2.06413	2.91158	0.00359604	0.029431	Upregulated	protein_coding
ENSG00000100652.5	212.324	7.52235	1.81187	4.15171	3.29999e-05	0.000925576	Upregulated	protein_coding
ENSG00000100814.19	261.818	8.57966	1.61108	5.3254	1.00733e-07	1.26468e-05	Upregulated	protein_coding
ENSG00000100823.12	656.975	6.49149	1.33445	4.86455	1.14717e-06	7.10846e-05	Upregulated	protein_coding
ENSG00000100836.11	478.751	-1.89473	0.595299	-3.18283	0.00145844	0.0155487	Downregulated	protein_coding
ENSG00000100897.18	6945.71	6.74596	1.25302	5.38377	7.29398e-08	1.01214e-05	Upregulated	protein_coding
ENSG00000100908.14	62.4762	4.07506	1.38364	2.94518	0.00322772	0.0273894	Upregulated	protein_coding
ENSG00000100918.14	266.803	2.16484	0.803589	2.69396	0.00706083	0.0463543	Upregulated	protein_coding
ENSG00000100926.15	32.6856	7.82799	1.89367	4.13377	3.56861e-05	0.00097803	Upregulated	protein_coding
ENSG00000100938.19	373.911	4.87467	1.18563	4.11145	3.93188e-05	0.00105672	Upregulated	protein_coding
ENSG00000101057.16	1663.84	-3.23571	0.923703	-3.50297	0.000460096	0.0068379	Downregulated	protein_coding
ENSG00000101158.15	223.676	-7.73772	2.34138	-3.30478	0.000950522	0.0115433	Downregulated	protein_coding
ENSG00000101220.18	497.447	-3.00185	0.754464	-3.97879	6.92658e-05	0.00161449	Downregulated	protein_coding
ENSG00000101247.18	364.5	2.26364	0.659115	3.43436	0.000593947	0.00821585	Upregulated	protein_coding
ENSG00000101342.10	67.7715	4.48818	1.40674	3.19049	0.00142031	0.015277	Upregulated	protein_coding
ENSG00000101353.16	28.8745	8.11652	1.96198	4.1369	3.52031e-05	0.000969831	Upregulated	protein_coding
ENSG00000101363.13	54.1164	6.44462	1.75969	3.66236	0.000249905	0.00427823	Upregulated	protein_coding
ENSG00000101405.3	13.5915	7.04965	2.02413	3.48281	0.000496184	0.00720368	Upregulated	protein_coding
ENSG00000101444.13	397.639	-2.0736	0.655537	-3.16322	0.00156036	0.0163035	Downregulated	protein_coding
ENSG00000101447.15	536.097	-2.41358	0.863099	-2.79641	0.00516746	0.0375413	Downregulated	protein_coding
ENSG00000101577.11	9703.43	-1.53904	0.491255	-3.13287	0.00173107	0.0175875	Downregulated	protein_coding
ENSG00000101745.17	6543.56	1.34857	0.500445	2.69473	0.00704454	0.0462819	Upregulated	protein_coding
ENSG00000101842.14	97.5217	2.80588	0.792711	3.5396	0.000400736	0.00616059	Upregulated	protein_coding
ENSG00000101850.13	10.2081	6.37339	2.26814	2.80996	0.00495477	0.0364285	Upregulated	protein_coding
ENSG00000101945.17	243.18	-2.49683	0.757632	-3.29557	0.000982205	0.0117923	Downregulated	protein_coding
ENSG00000101977.22	36.6711	2.38865	0.885423	2.69776	0.00698087	0.0459897	Upregulated	protein_coding
ENSG00000102053.13	319.524	1.6081	0.485345	3.31332	0.000921956	0.0112848	Upregulated	protein_coding
ENSG00000102057.10	25.4489	8.21463	2.00798	4.09099	4.29533e-05	0.00112637	Upregulated	protein_coding
ENSG00000102096.10	692.407	12.5529	2.2192	5.65649	1.54496e-08	3.45193e-06	Upregulated	protein_coding
ENSG00000102100.16	114.138	9.89887	2.06313	4.79799	1.60262e-06	9.41974e-05	Upregulated	protein_coding
ENSG00000102103.18	347.799	11.2878	2.08871	5.40417	6.51083e-08	9.38022e-06	Upregulated	protein_coding
ENSG00000102189.17	1408.4	1.51637	0.514758	2.9458	0.00322124	0.0273608	Upregulated	protein_coding
ENSG00000102309.15	281.318	2.24313	0.751791	2.98372	0.0028477	0.0251523	Upregulated	protein_coding
ENSG00000102796.12	146.537	1.77191	0.609065	2.90923	0.00362318	0.0295491	Upregulated	protein_coding
ENSG00000102805.16	756.836	1.70953	0.583577	2.9294	0.00339614	0.0282704	Upregulated	protein_coding
ENSG00000102901.13	609.051	-3.11185	0.974546	-3.19313	0.00140739	0.0151746	Downregulated	protein_coding
ENSG00000102904.15	64.1928	2.22039	0.727099	3.05377	0.00225983	0.0213396	Upregulated	protein_coding
ENSG00000102931.8	253.528	-4.5131	1.16632	-3.86952	0.000109048	0.00226027	Downregulated	protein_coding
ENSG00000102934.10	52.9768	3.20832	0.78802	4.07137	4.67378e-05	0.00120336	Upregulated	protein_coding
ENSG00000102977.18	163.969	-2.14376	0.73105	-2.93243	0.00336316	0.0280867	Downregulated	protein_coding
ENSG00000103067.14	93.8149	6.47603	1.56847	4.12889	3.64513e-05	0.000992808	Upregulated	protein_coding
ENSG00000103121.9	316.009	8.50683	1.83138	4.64503	3.4003e-06	0.000167255	Upregulated	protein_coding
ENSG00000103222.20	780.22	2.43617	0.711816	3.42247	0.000620541	0.0084482	Upregulated	protein_coding
ENSG00000103226.19	88.3074	5.89017	1.33555	4.4103	1.03228e-05	0.000395583	Upregulated	protein_coding
ENSG00000103245.14	361.093	-1.93302	0.653059	-2.95995	0.00307693	0.0265282	Downregulated	protein_coding
ENSG00000103257.9	7693.92	-3.67508	1.18912	-3.09057	0.0019977	0.0195434	Downregulated	protein_coding
ENSG00000103275.21	1794.52	-1.83677	0.680454	-2.69933	0.0069479	0.0458454	Downregulated	protein_coding
ENSG00000103316.12	23.8572	8.21656	2.09383	3.92417	8.70304e-05	0.0019024	Upregulated	protein_coding
ENSG00000103319.12	348.05	4.37899	1.02259	4.28227	1.84998e-05	0.000602158	Upregulated	protein_coding
ENSG00000103351.13	311.736	1.87455	0.564362	3.32154	0.000895222	0.0110518	Upregulated	protein_coding
ENSG00000103415.12	344.598	11.6725	2.06448	5.65396	1.56795e-08	3.47387e-06	Upregulated	protein_coding
ENSG00000103423.14	502.352	11.817	2.09413	5.64293	1.67176e-08	3.64265e-06	Upregulated	protein_coding
ENSG00000103429.11	395.741	7.79929	1.31747	5.91989	3.2216e-09	1.28693e-06	Upregulated	protein_coding
ENSG00000103489.12	618.326	5.59889	1.22669	4.56423	5.01334e-06	0.00022479	Upregulated	protein_coding
ENSG00000103495.15	2130.97	-5.41442	1.1642	-4.65077	3.30697e-06	0.00016358	Downregulated	protein_coding
ENSG00000103512.16	242.068	2.7904	0.981838	2.84202	0.00448289	0.0342187	Upregulated	protein_coding
ENSG00000104059.5	21.7107	7.82083	2.20838	3.54143	0.00039796	0.00612505	Upregulated	protein_coding
ENSG00000104067.17	28.6573	7.5851	2.12366	3.5717	0.000354668	0.00557592	Upregulated	protein_coding
ENSG00000104112.9	8.70734	6.15103	2.1843	2.81602	0.00486229	0.0360602	Upregulated	protein_coding
ENSG00000104147.9	39.4201	-6.12257	1.54722	-3.95716	7.58472e-05	0.00172985	Downregulated	protein_coding
ENSG00000104324.16	681.647	1.50025	0.44282	3.38794	0.000704195	0.00926453	Upregulated	protein_coding
ENSG00000104327.7	51.3461	9.5215	2.34835	4.05455	5.02306e-05	0.00126127	Upregulated	protein_coding
ENSG00000104447.13	1248.16	1.00595	0.344562	2.9195	0.00350599	0.0289132	Upregulated	protein_coding
ENSG00000104472.10	296.901	-1.84578	0.655257	-2.81688	0.0048492	0.0360446	Downregulated	protein_coding
ENSG00000104518.11	952.265	8.36867	1.35797	6.16262	7.15521e-10	5.67708e-07	Upregulated	protein_coding
ENSG00000104522.16	3889.23	7.51727	1.43056	5.25477	1.48212e-07	1.60018e-05	Upregulated	protein_coding
ENSG00000104524.14	55.1144	5.99279	1.69865	3.52796	0.000418768	0.00638937	Upregulated	protein_coding
ENSG00000104529.19	2028.13	4.06689	1.26542	3.21387	0.00130957	0.0144528	Upregulated	protein_coding
ENSG00000104626.15	687.011	3.92312	1.28237	3.05927	0.00221878	0.0210418	Upregulated	protein_coding
ENSG00000104643.10	508.927	5.14639	1.15732	4.44681	8.71551e-06	0.000348158	Upregulated	protein_coding
ENSG00000104728.16	12.413	6.71624	2.28861	2.93464	0.00333936	0.0279499	Upregulated	protein_coding
ENSG00000104765.16	295769	1.84458	0.692106	2.66517	0.00769502	0.0490876	Upregulated	protein_coding
ENSG00000104804.9	17.27	4.6327	1.49671	3.09525	0.00196647	0.0193383	Upregulated	protein_coding
ENSG00000104823.9	228.296	10.9472	2.15272	5.08528	3.67091e-07	2.99477e-05	Upregulated	protein_coding
ENSG00000104824.18	2004.11	10.9242	2.30616	4.73696	2.16944e-06	0.000120415	Upregulated	protein_coding
ENSG00000104825.17	192.841	7.40757	1.63186	4.53934	5.64319e-06	0.000246737	Upregulated	protein_coding
ENSG00000104835.15	43.4832	8.32278	2.03573	4.08836	4.34439e-05	0.00113385	Upregulated	protein_coding
ENSG00000104859.15	871.661	-2.42706	0.872845	-2.78063	0.0054253	0.0388902	Downregulated	protein_coding
ENSG00000104885.19	1370.34	-2.43213	0.909772	-2.67334	0.00750991	0.0482924	Downregulated	protein_coding
ENSG00000104936.20	257.791	-2.99774	0.902528	-3.32149	0.000895375	0.0110518	Downregulated	protein_coding
ENSG00000104969.11	498.369	-2.54749	0.922923	-2.76024	0.00577596	0.040544	Downregulated	protein_coding
ENSG00000104972.16	214.231	3.51631	1.03241	3.40592	0.000659415	0.00883012	Upregulated	protein_coding
ENSG00000104973.19	2591.88	-2.88582	0.998602	-2.88986	0.00385413	0.030746	Downregulated	protein_coding
ENSG00000104974.12	155.174	9.13521	2.00177	4.56356	5.02924e-06	0.000224794	Upregulated	protein_coding
ENSG00000104998.4	422.187	10.6548	2.1031	5.06625	4.05721e-07	3.21226e-05	Upregulated	protein_coding
ENSG00000105011.9	90.2152	4.42956	1.20867	3.66482	0.000247512	0.00425124	Upregulated	protein_coding
ENSG00000105176.18	1432.78	1.24461	0.468578	2.65614	0.0079041	0.0499764	Upregulated	protein_coding
ENSG00000105185.12	392.787	1.84566	0.649275	2.84265	0.00447398	0.0341606	Upregulated	protein_coding
ENSG00000105193.9	2849.87	-2.55698	0.798242	-3.20326	0.00135881	0.014822	Downregulated	protein_coding
ENSG00000105197.11	440.997	-1.04192	0.347206	-3.00088	0.00269201	0.0241001	Downregulated	protein_coding
ENSG00000105202.9	558.476	9.7385	1.7676	5.50946	3.59935e-08	6.16213e-06	Upregulated	protein_coding
ENSG00000105204.14	153.903	4.03367	1.20888	3.33669	0.000847823	0.0105897	Upregulated	protein_coding
ENSG00000105246.6	7.30657	-5.41249	1.96195	-2.75873	0.0058026	0.040713	Downregulated	protein_coding
ENSG00000105289.15	47.2674	4.57603	1.0333	4.42857	9.48587e-06	0.000371061	Upregulated	protein_coding
ENSG00000105341.19	212.065	-1.68283	0.509903	-3.30028	0.000965872	0.0116546	Downregulated	protein_coding
ENSG00000105352.11	175.648	2.77602	1.01321	2.73983	0.00614715	0.042349	Upregulated	protein_coding
ENSG00000105364.14	187.744	-2.99731	1.06771	-2.80723	0.00499698	0.0366468	Downregulated	protein_coding
ENSG00000105376.5	53.7131	-2.81533	1.02658	-2.74244	0.00609849	0.0421459	Downregulated	protein_coding
ENSG00000105519.18	104.996	1.83725	0.654744	2.80606	0.00501515	0.0367263	Upregulated	protein_coding
ENSG00000105576.16	1064.01	-2.33987	0.750537	-3.1176	0.00182333	0.0182858	Downregulated	protein_coding
ENSG00000105609.17	17.0392	5.79702	2.00599	2.88986	0.00385418	0.030746	Upregulated	protein_coding
ENSG00000105617.4	98.3932	8.36409	1.98511	4.21341	2.51549e-05	0.000760561	Upregulated	protein_coding
ENSG00000105618.14	315.825	4.77536	1.00555	4.74898	2.04443e-06	0.000114684	Upregulated	protein_coding
ENSG00000105619.14	76.4873	7.63034	1.81958	4.19347	2.74724e-05	0.000801848	Upregulated	protein_coding
ENSG00000105722.10	229.785	-2.46036	0.822865	-2.98999	0.0027899	0.024805	Downregulated	protein_coding
ENSG00000105750.15	140.867	10.1709	2.01835	5.0392	4.67481e-07	3.544e-05	Upregulated	protein_coding
ENSG00000105771.14	357.122	-1.66314	0.623302	-2.66828	0.00762414	0.0487416	Downregulated	protein_coding
ENSG00000105784.16	31.2754	5.77696	1.47316	3.92148	8.80056e-05	0.00191758	Upregulated	protein_coding
ENSG00000105856.14	2840.38	5.15006	1.23689	4.16373	3.13094e-05	0.000889518	Upregulated	protein_coding
ENSG00000105865.11	59.9634	5.97349	1.58354	3.77225	0.000161783	0.00304264	Upregulated	protein_coding
ENSG00000105877.19	54.3923	4.37024	1.24023	3.52372	0.000425533	0.0064515	Upregulated	protein_coding
ENSG00000105926.16	2325.1	1.79328	0.620791	2.88871	0.00386831	0.0308166	Upregulated	protein_coding
ENSG00000106028.11	1078.37	4.05614	0.949107	4.27364	1.92306e-05	0.000619823	Upregulated	protein_coding
ENSG00000106034.18	456.444	2.97752	0.758063	3.9278	8.57282e-05	0.00188509	Upregulated	protein_coding
ENSG00000106070.20	487.854	-2.16804	0.644145	-3.36576	0.000763334	0.00983346	Downregulated	protein_coding
ENSG00000106123.12	162.373	2.62891	0.729409	3.60417	0.000313152	0.00507453	Upregulated	protein_coding
ENSG00000106211.10	201.496	-4.55047	1.12713	-4.0372	5.40935e-05	0.00132995	Downregulated	protein_coding
ENSG00000106258.16	201.285	3.65028	1.22546	2.97871	0.00289461	0.0254277	Upregulated	protein_coding
ENSG00000106327.13	1972.11	-2.87732	0.842914	-3.41354	0.000641257	0.00862588	Downregulated	protein_coding
ENSG00000106351.13	331.432	-1.77853	0.64132	-2.77324	0.00555014	0.0395592	Downregulated	protein_coding
ENSG00000106397.12	480.031	-1.39195	0.509467	-2.73217	0.00629184	0.0429864	Downregulated	protein_coding
ENSG00000106404.14	383.458	-3.12177	0.95817	-3.25806	0.00112177	0.0130095	Downregulated	protein_coding
ENSG00000106541.12	13.7399	6.98413	2.52917	2.76143	0.00575487	0.0404282	Upregulated	protein_coding
ENSG00000106560.11	778.101	2.29517	0.742032	3.09309	0.00198086	0.0194508	Upregulated	protein_coding
ENSG00000106588.12	199.294	-1.76652	0.656136	-2.69231	0.00709585	0.0464338	Downregulated	protein_coding
ENSG00000106624.11	516.109	-3.63433	1.09153	-3.32959	0.000869752	0.0108165	Downregulated	protein_coding
ENSG00000106628.13	509.784	-2.09635	0.612322	-3.42361	0.000617943	0.00843712	Downregulated	protein_coding
ENSG00000106635.8	430.981	-1.74175	0.611899	-2.84647	0.00442072	0.0338815	Downregulated	protein_coding
ENSG00000106714.18	65.0738	5.22504	0.98766	5.29032	1.22103e-07	1.41601e-05	Upregulated	protein_coding
ENSG00000106723.17	777.699	-1.06774	0.378485	-2.82109	0.00478612	0.03577	Downregulated	protein_coding
ENSG00000106809.11	70.9444	8.9368	2.12288	4.20976	2.55647e-05	0.000769423	Upregulated	protein_coding
ENSG00000106819.13	48.1004	8.74684	2.01457	4.34178	1.41333e-05	0.000497635	Upregulated	protein_coding
ENSG00000106823.13	71.7299	8.96885	2.14717	4.17705	2.9531e-05	0.000849057	Upregulated	protein_coding
ENSG00000106991.14	482.188	-3.23012	1.02019	-3.16621	0.00154439	0.0161707	Downregulated	protein_coding
ENSG00000106993.12	385.473	1.72239	0.593781	2.90071	0.00372316	0.0300923	Upregulated	protein_coding
ENSG00000107130.10	227.331	-2.95142	0.856651	-3.4453	0.000570418	0.00795716	Downregulated	protein_coding
ENSG00000107147.14	18.0383	5.91722	2.21009	2.67737	0.00742031	0.0477978	Upregulated	protein_coding
ENSG00000107223.13	2189.93	1.53103	0.539281	2.83901	0.00452532	0.0344697	Upregulated	protein_coding
ENSG00000107779.15	106.084	2.19246	0.703237	3.11767	0.0018229	0.0182858	Upregulated	protein_coding
ENSG00000107816.17	249.934	-1.87242	0.669124	-2.79831	0.00513701	0.0373723	Downregulated	protein_coding
ENSG00000107890.17	1133.83	1.95661	0.569351	3.43656	0.00058915	0.00815806	Upregulated	protein_coding
ENSG00000108107.15	3841.22	-2.24798	0.810092	-2.77497	0.00552064	0.0393952	Downregulated	protein_coding
ENSG00000108175.19	1927.12	-2.6419	0.862814	-3.06196	0.00219893	0.0208918	Downregulated	protein_coding
ENSG00000108244.17	86.573	10.1193	2.11247	4.79024	1.66578e-06	9.71643e-05	Upregulated	protein_coding
ENSG00000108255.8	25.2277	7.79459	2.19999	3.54301	0.000395587	0.00609564	Upregulated	protein_coding
ENSG00000108298.12	22072.4	1.90256	0.656951	2.89605	0.00377897	0.0303943	Upregulated	protein_coding
ENSG00000108306.13	1864.3	-1.143	0.402428	-2.84026	0.0045077	0.0343683	Downregulated	protein_coding
ENSG00000108370.17	261.681	2.93738	0.794409	3.69756	0.000217678	0.00384914	Upregulated	protein_coding
ENSG00000108375.13	69.5062	3.19751	1.16919	2.73482	0.00624146	0.0427641	Upregulated	protein_coding
ENSG00000108379.11	12.8669	6.69385	2.27381	2.94389	0.00324118	0.0274495	Upregulated	protein_coding
ENSG00000108518.8	3426.82	-1.95352	0.686749	-2.84459	0.00444682	0.0340055	Downregulated	protein_coding
ENSG00000108819.11	3364	-2.54351	0.904679	-2.8115	0.00493106	0.036325	Downregulated	protein_coding
ENSG00000108828.16	418.207	-1.63619	0.581889	-2.81186	0.00492561	0.036295	Downregulated	protein_coding
ENSG00000108950.12	96.0556	3.26091	0.843491	3.86597	0.00011065	0.00227736	Upregulated	protein_coding
ENSG00000109063.15	161.678	1.76878	0.521593	3.39111	0.000696099	0.00919471	Upregulated	protein_coding
ENSG00000109163.7	41.6636	8.7053	2.08352	4.17816	2.93877e-05	0.000845859	Upregulated	protein_coding
ENSG00000109321.11	262.592	-2.50717	0.748304	-3.35047	0.000806733	0.0102257	Downregulated	protein_coding
ENSG00000109339.24	65.7594	3.08873	1.12864	2.73668	0.00620621	0.0426147	Upregulated	protein_coding
ENSG00000109452.13	1847.89	2.5429	0.570951	4.45379	8.43665e-06	0.000340111	Upregulated	protein_coding
ENSG00000109475.17	9802.09	1.68923	0.618343	2.73187	0.00629764	0.042995	Upregulated	protein_coding
ENSG00000109534.17	166.656	-2.84482	0.794726	-3.57962	0.000344094	0.00544539	Downregulated	protein_coding
ENSG00000109536.12	765.605	4.69529	1.51437	3.10048	0.00193205	0.0190709	Upregulated	protein_coding
ENSG00000109670.17	7027.02	2.20716	0.683189	3.23068	0.00123498	0.0139105	Upregulated	protein_coding
ENSG00000109686.20	126.139	9.17531	2.12183	4.32424	1.53056e-05	0.000529571	Upregulated	protein_coding
ENSG00000109771.16	145.965	2.18124	0.593594	3.67464	0.000238189	0.00413314	Upregulated	protein_coding
ENSG00000109919.10	700.26	3.64998	1.29611	2.81609	0.00486116	0.0360602	Upregulated	protein_coding
ENSG00000109920.13	2081.9	5.29521	1.26698	4.1794	2.9228e-05	0.000842183	Upregulated	protein_coding
ENSG00000109943.9	245.323	2.71918	0.764444	3.55707	0.000375018	0.00582294	Upregulated	protein_coding
ENSG00000110060.9	118.907	2.13373	0.724852	2.94368	0.00324334	0.0274513	Upregulated	protein_coding
ENSG00000110090.13	2605.51	-1.25586	0.470635	-2.66843	0.00762059	0.0487416	Downregulated	protein_coding
ENSG00000110107.9	1037.44	-1.43277	0.45175	-3.1716	0.00151601	0.0159496	Downregulated	protein_coding
ENSG00000110108.10	518.022	-1.92458	0.626505	-3.07193	0.00212682	0.020383	Downregulated	protein_coding
ENSG00000110172.12	1121.06	5.96431	1.07366	5.55512	2.77426e-08	5.22452e-06	Upregulated	protein_coding
ENSG00000110200.9	169.642	-2.45042	0.770263	-3.18128	0.00146626	0.0156068	Downregulated	protein_coding
ENSG00000110400.11	394.916	-3.38152	0.591625	-5.71564	1.09292e-08	2.74427e-06	Downregulated	protein_coding
ENSG00000110436.13	75.717	5.59823	1.48737	3.76384	0.000167321	0.00310883	Upregulated	protein_coding
ENSG00000110497.15	1814.2	-1.43945	0.520178	-2.76722	0.00565366	0.0399514	Downregulated	protein_coding
ENSG00000110619.18	772.449	3.9738	1.10843	3.58506	0.000337	0.00537508	Upregulated	protein_coding
ENSG00000110756.18	728.261	7.64803	1.32116	5.78889	7.08528e-09	2.23283e-06	Upregulated	protein_coding
ENSG00000110768.12	854.303	6.72754	1.22465	5.49342	3.94223e-08	6.57828e-06	Upregulated	protein_coding
ENSG00000111206.13	497.584	-3.7238	0.765535	-4.86431	1.14857e-06	7.10846e-05	Downregulated	protein_coding
ENSG00000111252.11	2280.79	-1.6407	0.601032	-2.72981	0.00633717	0.0431284	Downregulated	protein_coding
ENSG00000111261.14	118.525	9.98719	2.03194	4.91511	8.87348e-07	5.81963e-05	Upregulated	protein_coding
ENSG00000111266.9	503.924	11.7398	2.20432	5.32581	1.00506e-07	1.26468e-05	Upregulated	protein_coding
ENSG00000111305.19	7.50508	6.6674	2.44025	2.73226	0.00629009	0.0429864	Upregulated	protein_coding
ENSG00000111331.14	1069.21	-2.09395	0.653387	-3.20477	0.00135172	0.0147692	Downregulated	protein_coding
ENSG00000111644.8	129.455	-1.74576	0.617079	-2.82906	0.00466844	0.0352549	Downregulated	protein_coding
ENSG00000111684.11	452.502	-3.51388	0.584675	-6.00997	1.85562e-09	1.01924e-06	Downregulated	protein_coding
ENSG00000111725.11	996.65	-1.83795	0.625107	-2.94022	0.00327983	0.0276183	Downregulated	protein_coding
ENSG00000111728.11	239.748	3.49491	0.924712	3.77946	0.000157171	0.00297261	Upregulated	protein_coding
ENSG00000111796.4	681.547	2.54659	0.833601	3.05493	0.00225112	0.0212717	Upregulated	protein_coding
ENSG00000111834.13	33.9023	2.07782	0.76495	2.71628	0.00660192	0.0444369	Upregulated	protein_coding
ENSG00000111843.14	1952.05	8.76338	1.58015	5.5459	2.92443e-08	5.42976e-06	Upregulated	protein_coding
ENSG00000111845.5	314.545	8.74283	1.87796	4.65549	3.23204e-06	0.000160174	Upregulated	protein_coding
ENSG00000111846.20	946.095	9.60517	1.78619	5.37747	7.55388e-08	1.03782e-05	Upregulated	protein_coding
ENSG00000111860.14	2012.5	1.25459	0.453458	2.76671	0.0056625	0.0399711	Upregulated	protein_coding
ENSG00000111879.20	66.7385	2.45003	0.800882	3.05917	0.00221951	0.0210418	Upregulated	protein_coding
ENSG00000112038.18	7.40975	6.84229	2.51813	2.71721	0.00658346	0.0443693	Upregulated	protein_coding
ENSG00000112290.13	205.211	-3.80946	0.954693	-3.99025	6.6004e-05	0.00155564	Downregulated	protein_coding
ENSG00000112304.11	392.735	2.39623	0.748087	3.20314	0.00135937	0.014822	Upregulated	protein_coding
ENSG00000112309.11	43.0269	5.77885	1.71751	3.36467	0.000766348	0.0098441	Upregulated	protein_coding
ENSG00000112335.15	28258.5	1.84225	0.690649	2.66742	0.0076436	0.0488305	Upregulated	protein_coding
ENSG00000112473.19	389.735	11.4391	2.17686	5.25488	1.48125e-07	1.60018e-05	Upregulated	protein_coding
ENSG00000112511.18	564.31	7.86111	1.31839	5.96265	2.48181e-09	1.14561e-06	Upregulated	protein_coding
ENSG00000112514.18	272.139	6.52383	1.26632	5.15181	2.57989e-07	2.33741e-05	Upregulated	protein_coding
ENSG00000112584.14	928.687	8.86553	1.43945	6.15899	7.3211e-10	5.67708e-07	Upregulated	protein_coding
ENSG00000112640.16	399.392	-2.02388	0.699401	-2.89374	0.00380688	0.0305071	Downregulated	protein_coding
ENSG00000112651.12	92.6136	-2.29575	0.724033	-3.17078	0.00152029	0.0159818	Downregulated	protein_coding
ENSG00000112658.8	622.609	-1.92294	0.589841	-3.2601	0.00111374	0.0129299	Downregulated	protein_coding
ENSG00000112685.14	1545.47	1.05374	0.347756	3.03012	0.0024446	0.0224885	Upregulated	protein_coding
ENSG00000112715.26	547.624	-1.75695	0.64133	-2.73953	0.00615263	0.0423757	Downregulated	protein_coding
ENSG00000112759.19	721.962	-4.70418	0.756935	-6.21478	5.13971e-10	4.83958e-07	Downregulated	protein_coding
ENSG00000112763.17	378.595	6.94308	1.23002	5.64468	1.65487e-08	3.6359e-06	Upregulated	protein_coding
ENSG00000113068.10	311.048	-1.13709	0.424019	-2.6817	0.00732489	0.0474498	Downregulated	protein_coding
ENSG00000113231.14	10.7128	3.6495	1.30165	2.80374	0.00505133	0.0369222	Upregulated	protein_coding
ENSG00000113249.14	89.8256	3.03562	0.749708	4.04907	5.14227e-05	0.00128103	Upregulated	protein_coding
ENSG00000113263.14	3953	2.23123	0.731849	3.04876	0.00229788	0.0215737	Upregulated	protein_coding
ENSG00000113319.13	710.54	2.42072	0.700583	3.45529	0.000549694	0.00777204	Upregulated	protein_coding
ENSG00000113595.15	3798.94	1.50794	0.561792	2.68417	0.00727107	0.0472244	Upregulated	protein_coding
ENSG00000113643.9	2839.92	1.75859	0.657222	2.67579	0.00745523	0.0479876	Upregulated	protein_coding
ENSG00000113763.12	79.8985	6.22802	1.57444	3.9557	7.63116e-05	0.00173838	Upregulated	protein_coding
ENSG00000114026.22	353.377	-1.5317	0.56819	-2.69576	0.00702286	0.0462201	Downregulated	protein_coding
ENSG00000114107.9	835.946	1.96439	0.610438	3.218	0.00129086	0.0143178	Upregulated	protein_coding
ENSG00000114656.13	144.341	2.81423	0.705512	3.98892	6.63741e-05	0.00155967	Upregulated	protein_coding
ENSG00000114670.14	58.2975	2.03208	0.706986	2.87429	0.00404939	0.0318503	Upregulated	protein_coding
ENSG00000114757.19	15.6727	7.43073	2.10077	3.53715	0.000404468	0.00620349	Upregulated	protein_coding
ENSG00000114790.13	27.1176	8.36612	2.19881	3.80483	0.000141901	0.00274738	Upregulated	protein_coding
ENSG00000114859.16	111.471	-3.13549	0.727547	-4.30967	1.635e-05	0.000550598	Downregulated	protein_coding
ENSG00000114933.16	1948.8	6.34702	1.11717	5.68136	1.3363e-08	3.11784e-06	Upregulated	protein_coding
ENSG00000114942.14	7594.63	8.45059	1.26869	6.66086	2.72222e-11	5.12651e-08	Upregulated	protein_coding
ENSG00000115042.10	206.736	3.75098	1.36648	2.745	0.00605104	0.041869	Upregulated	protein_coding
ENSG00000115073.8	537.603	12.0318	2.19953	5.47017	4.496e-08	7.09802e-06	Upregulated	protein_coding
ENSG00000115085.15	2260.16	12.5276	1.92982	6.4916	8.49308e-11	1.17853e-07	Upregulated	protein_coding
ENSG00000115107.20	1019.07	-3.42597	1.06304	-3.22281	0.00126942	0.0141578	Downregulated	protein_coding
ENSG00000115165.10	5537.56	1.63546	0.612405	2.67056	0.00757253	0.0485766	Upregulated	protein_coding
ENSG00000115353.11	24.4032	3.44985	1.23229	2.79955	0.00511731	0.0372674	Upregulated	protein_coding
ENSG00000115423.19	120.808	2.3731	0.74454	3.18734	0.0014359	0.0153874	Upregulated	protein_coding
ENSG00000115474.7	83.5198	9.48538	2.07115	4.57976	4.65521e-06	0.000211977	Upregulated	protein_coding
ENSG00000115657.14	385.968	-2.38707	0.751211	-3.17762	0.00148488	0.0156972	Downregulated	protein_coding
ENSG00000115828.17	379.721	2.10936	0.745623	2.82899	0.00466946	0.0352549	Upregulated	protein_coding
ENSG00000115840.14	379.038	11.6646	1.95588	5.96389	2.46303e-09	1.14561e-06	Upregulated	protein_coding
ENSG00000115841.21	253.345	1.69908	0.627484	2.70777	0.00677369	0.0451442	Upregulated	protein_coding
ENSG00000116127.20	3894.2	15.0514	2.52084	5.97079	2.36102e-09	1.14561e-06	Upregulated	protein_coding
ENSG00000116194.13	220.969	7.3168	1.65503	4.42094	9.82733e-06	0.000380466	Upregulated	protein_coding
ENSG00000116273.6	301.128	-1.7436	0.599337	-2.90921	0.00362345	0.0295491	Downregulated	protein_coding
ENSG00000116299.17	135.837	1.52021	0.556828	2.73012	0.00633117	0.0431284	Upregulated	protein_coding
ENSG00000116521.11	192.059	10.5775	2.10066	5.03532	4.77061e-07	3.5834e-05	Upregulated	protein_coding
ENSG00000116574.6	291.494	11.0982	2.18831	5.07158	3.94516e-07	3.15195e-05	Upregulated	protein_coding
ENSG00000116604.19	693.908	12.2526	2.06012	5.94749	2.72282e-09	1.15786e-06	Upregulated	protein_coding
ENSG00000116649.10	201.567	-2.72149	0.889193	-3.06063	0.00220869	0.0209695	Downregulated	protein_coding
ENSG00000116668.13	7215.83	2.16599	0.73937	2.92951	0.00339499	0.0282704	Upregulated	protein_coding
ENSG00000116771.6	110.594	2.43369	0.615789	3.95215	7.74534e-05	0.00175667	Upregulated	protein_coding
ENSG00000116824.5	683.807	1.95624	0.63936	3.05969	0.00221566	0.0210281	Upregulated	protein_coding
ENSG00000116983.13	83.3634	2.83994	0.924277	3.07261	0.00212196	0.0203549	Upregulated	protein_coding
ENSG00000117020.19	1250.02	6.91827	1.25636	5.50662	3.65782e-08	6.22184e-06	Upregulated	protein_coding
ENSG00000117115.13	625.214	6.14114	1.27273	4.82518	1.39877e-06	8.47783e-05	Upregulated	protein_coding
ENSG00000117118.11	1351.31	8.95086	1.65393	5.41188	6.23675e-08	9.03472e-06	Upregulated	protein_coding
ENSG00000117226.12	487.072	1.61305	0.517489	3.11707	0.00182657	0.0182969	Upregulated	protein_coding
ENSG00000117318.9	49.2809	6.90341	2.21753	3.11311	0.00185127	0.0184741	Upregulated	protein_coding
ENSG00000117400.18	44.1863	-3.44112	0.73793	-4.6632	3.11325e-06	0.000156122	Downregulated	protein_coding
ENSG00000117408.11	339.527	-2.16081	0.790265	-2.73429	0.00625153	0.0428108	Downregulated	protein_coding
ENSG00000117477.13	15.965	4.64908	1.4203	3.27331	0.00106296	0.0124556	Upregulated	protein_coding
ENSG00000117676.14	1674.73	12.2299	2.20071	5.55727	2.74033e-08	5.19776e-06	Upregulated	protein_coding
ENSG00000117877.11	17.1776	-5.87533	1.42658	-4.11847	3.814e-05	0.00103347	Downregulated	protein_coding
ENSG00000117983.17	62.9414	8.55252	2.04476	4.18265	2.88129e-05	0.000833868	Upregulated	protein_coding
ENSG00000117984.15	1228.98	-1.55527	0.461562	-3.36958	0.000752824	0.00972951	Downregulated	protein_coding
ENSG00000118181.11	12752.3	15.0561	2.64914	5.6834	1.32044e-08	3.11784e-06	Upregulated	protein_coding
ENSG00000118298.12	46.6741	7.05066	2.24015	3.14741	0.00164725	0.0169449	Upregulated	protein_coding
ENSG00000118412.13	2253.89	8.44461	1.3457	6.27526	3.49048e-10	3.78834e-07	Upregulated	protein_coding
ENSG00000118495.21	266.138	-1.89068	0.555691	-3.40239	0.000667996	0.00891281	Downregulated	protein_coding
ENSG00000118507.19	3802.84	2.23715	0.765473	2.92257	0.00347153	0.0287098	Upregulated	protein_coding
ENSG00000118620.13	800.499	1.54483	0.539302	2.86449	0.00417677	0.0325416	Upregulated	protein_coding
ENSG00000118690.13	165.439	1.47299	0.493324	2.98585	0.00282792	0.0250615	Upregulated	protein_coding
ENSG00000118705.18	1878.44	7.10075	1.32909	5.34256	9.16455e-08	1.20555e-05	Upregulated	protein_coding
ENSG00000118785.15	416.846	3.37329	1.09679	3.07561	0.00210074	0.0202065	Upregulated	protein_coding
ENSG00000118898.16	83.8173	5.59431	1.44521	3.87095	0.000108414	0.00225777	Upregulated	protein_coding
ENSG00000118997.14	33.9797	3.84374	1.27342	3.01843	0.00254087	0.0231399	Upregulated	protein_coding
ENSG00000119147.10	9.77156	5.55025	1.89034	2.93611	0.0033236	0.0278733	Upregulated	protein_coding
ENSG00000119280.17	382.11	-2.46146	0.755852	-3.25654	0.0011278	0.0130587	Downregulated	protein_coding
ENSG00000119431.10	116.875	-1.75238	0.524508	-3.341	0.000834764	0.0105042	Downregulated	protein_coding
ENSG00000119608.15	51.9876	5.43103	1.48792	3.65009	0.000262151	0.00444191	Upregulated	protein_coding
ENSG00000119632.4	122.341	6.16267	1.43205	4.30338	1.68214e-05	0.000559971	Upregulated	protein_coding
ENSG00000119689.15	1566.79	-1.04315	0.382965	-2.72389	0.00645179	0.043683	Downregulated	protein_coding
ENSG00000119714.11	96.321	2.54077	0.860728	2.95188	0.00315843	0.0269663	Upregulated	protein_coding
ENSG00000119771.15	144	3.23019	0.817348	3.95203	7.74895e-05	0.00175667	Upregulated	protein_coding
ENSG00000119777.20	373.464	-2.20746	0.749788	-2.94411	0.00323881	0.0274495	Downregulated	protein_coding
ENSG00000119865.9	187.756	-2.44332	0.873735	-2.79641	0.00516738	0.0375413	Downregulated	protein_coding
ENSG00000120071.15	3260.64	6.36133	1.11017	5.73003	1.00414e-08	2.67417e-06	Upregulated	protein_coding
ENSG00000120210.8	50.4029	8.34081	2.04029	4.08805	4.35009e-05	0.00113385	Upregulated	protein_coding
ENSG00000120215.10	100.446	9.81202	1.98328	4.94736	7.5226e-07	5.12378e-05	Upregulated	protein_coding
ENSG00000120306.11	3623.85	2.6492	0.968075	2.73657	0.00620835	0.0426147	Upregulated	protein_coding
ENSG00000120685.20	906.101	-1.40222	0.518092	-2.70652	0.00679934	0.0452117	Downregulated	protein_coding
ENSG00000120709.11	1175.46	-1.60443	0.547103	-2.93259	0.00336143	0.0280812	Downregulated	protein_coding
ENSG00000120729.10	9.20297	6.10719	2.22827	2.74078	0.00612942	0.04226	Upregulated	protein_coding
ENSG00000120903.13	59.6084	4.42139	1.35236	3.2694	0.00107778	0.0125955	Upregulated	protein_coding
ENSG00000120925.16	261.233	1.28906	0.469415	2.74611	0.00603073	0.0418089	Upregulated	protein_coding
ENSG00000121060.19	1655.33	-1.06747	0.369033	-2.89262	0.00382042	0.0305681	Downregulated	protein_coding
ENSG00000121454.6	74.8867	6.77396	1.61903	4.18397	2.86467e-05	0.000831796	Upregulated	protein_coding
ENSG00000122012.14	10.7256	5.74329	2.08882	2.74954	0.00596795	0.0414939	Upregulated	protein_coding
ENSG00000122026.11	36356.2	4.70799	1.0553	4.46128	8.14697e-06	0.000329946	Upregulated	protein_coding
ENSG00000122033.15	633.754	1.19459	0.404854	2.95067	0.00317081	0.0270283	Upregulated	protein_coding
ENSG00000122140.13	184.293	-2.09733	0.623773	-3.36233	0.000772879	0.00991098	Downregulated	protein_coding
ENSG00000122477.14	47.0458	2.19099	0.65119	3.3646	0.000766544	0.0098441	Upregulated	protein_coding
ENSG00000122483.18	3248.82	2.35959	0.773203	3.05171	0.00227539	0.0214417	Upregulated	protein_coding
ENSG00000122484.9	1103.28	1.01371	0.347453	2.91754	0.00352806	0.0290498	Upregulated	protein_coding
ENSG00000122970.16	166.82	1.36184	0.509856	2.67104	0.00756169	0.0485189	Upregulated	protein_coding
ENSG00000123064.13	922.339	-1.8624	0.678115	-2.74644	0.00602455	0.0417784	Downregulated	protein_coding
ENSG00000123106.11	3799.56	1.77704	0.66712	2.66376	0.00772734	0.0492224	Upregulated	protein_coding
ENSG00000123124.14	2166.68	1.22012	0.457921	2.66448	0.00771074	0.0491642	Upregulated	protein_coding
ENSG00000123349.15	115.117	4.2384	1.08127	3.91983	8.86128e-05	0.00192286	Upregulated	protein_coding
ENSG00000123374.11	573.833	-2.25392	0.750522	-3.00314	0.00267209	0.0239848	Downregulated	protein_coding
ENSG00000123444.14	123.517	6.67608	1.58532	4.2112	2.54022e-05	0.000766548	Upregulated	protein_coding
ENSG00000123500.10	97.3412	4.36298	1.16691	3.73891	0.000184817	0.00335817	Upregulated	protein_coding
ENSG00000123612.16	49.8812	3.66041	1.2846	2.84947	0.00437927	0.0337155	Upregulated	protein_coding
ENSG00000123643.14	1659.12	-1.97835	0.628312	-3.14868	0.00164011	0.016906	Downregulated	protein_coding
ENSG00000124091.10	103.264	9.67225	2.0561	4.70416	2.5491e-06	0.000135225	Upregulated	protein_coding
ENSG00000124092.13	9.56269	7.14985	2.61614	2.73298	0.00627639	0.0429253	Upregulated	protein_coding
ENSG00000124134.9	157.55	6.03871	1.63841	3.68572	0.000228056	0.00399514	Upregulated	protein_coding
ENSG00000124172.10	19922.6	2.67417	0.934658	2.86112	0.00422142	0.0328312	Upregulated	protein_coding
ENSG00000124251.11	47.0431	8.38969	2.0312	4.13041	3.6212e-05	0.00098731	Upregulated	protein_coding
ENSG00000124422.12	2150.11	-1.566	0.522822	-2.99528	0.00274193	0.0244722	Downregulated	protein_coding
ENSG00000124562.10	240.141	-2.36842	0.714899	-3.31294	0.000923209	0.0112948	Downregulated	protein_coding
ENSG00000124614.17	291.925	-2.89244	0.876264	-3.30088	0.000963826	0.0116477	Downregulated	protein_coding
ENSG00000124702.19	965.541	-1.09018	0.345383	-3.15643	0.00159713	0.0165846	Downregulated	protein_coding
ENSG00000125037.13	17227.6	2.38765	0.83805	2.84905	0.004385	0.0337155	Upregulated	protein_coding
ENSG00000125352.6	337.047	1.5321	0.536382	2.85637	0.00428521	0.0331902	Upregulated	protein_coding
ENSG00000125354.24	1723.84	3.24803	0.863259	3.76252	0.000168207	0.00311943	Upregulated	protein_coding
ENSG00000125434.11	87.9382	-2.62399	0.807348	-3.25014	0.00115349	0.0132976	Downregulated	protein_coding
ENSG00000125505.17	254.713	5.7683	1.12012	5.14972	2.60882e-07	2.34955e-05	Upregulated	protein_coding
ENSG00000125898.13	191.807	-3.31144	0.72524	-4.56599	4.9715e-06	0.000224441	Downregulated	protein_coding
ENSG00000125944.21	2352.95	9.27013	1.48894	6.22598	4.78556e-10	4.67301e-07	Upregulated	protein_coding
ENSG00000125945.15	152.397	10.469	2.08505	5.02101	5.14003e-07	3.81738e-05	Upregulated	protein_coding
ENSG00000125966.10	70.9318	5.39244	1.31945	4.0869	4.3718e-05	0.00113783	Upregulated	protein_coding
ENSG00000126003.7	586.87	-2.19585	0.637265	-3.44574	0.000569495	0.00795694	Downregulated	protein_coding
ENSG00000126062.4	307.447	-2.34202	0.856257	-2.73518	0.00623463	0.0427506	Downregulated	protein_coding
ENSG00000126067.12	774.95	-1.7655	0.485959	-3.63302	0.000280127	0.00464408	Downregulated	protein_coding
ENSG00000126249.8	33.7808	8.34674	2.21909	3.76133	0.000169015	0.00313146	Upregulated	protein_coding
ENSG00000126254.12	408.756	-2.50472	0.743745	-3.36772	0.000757932	0.00978114	Downregulated	protein_coding
ENSG00000126261.13	2541.31	8.14689	1.47834	5.51083	3.57149e-08	6.16213e-06	Upregulated	protein_coding
ENSG00000126453.11	136.535	-2.70527	0.884979	-3.05688	0.00223657	0.0211732	Downregulated	protein_coding
ENSG00000126461.15	795.806	-3.09656	1.11845	-2.76861	0.00562951	0.0398235	Downregulated	protein_coding
ENSG00000126583.12	29.5552	-4.99231	1.51584	-3.29342	0.000989756	0.0118452	Downregulated	protein_coding
ENSG00000126705.15	414.692	-4.13573	1.13643	-3.63925	0.000273436	0.00456853	Downregulated	protein_coding
ENSG00000126709.16	308.93	-2.724	0.577348	-4.71813	2.3802e-06	0.000128858	Downregulated	protein_coding
ENSG00000126746.19	549.649	-2.39106	0.805887	-2.96699	0.00300733	0.0261419	Downregulated	protein_coding
ENSG00000126768.13	411.192	11.6661	2.18511	5.33889	9.35171e-08	1.20862e-05	Upregulated	protein_coding
ENSG00000126821.8	334.162	9.89742	2.09302	4.72878	2.25871e-06	0.000124064	Upregulated	protein_coding
ENSG00000126838.10	906.423	11.9092	2.10186	5.66603	1.46148e-08	3.36445e-06	Upregulated	protein_coding
ENSG00000126860.12	818.055	5.12034	0.983504	5.20622	1.92726e-07	1.91024e-05	Upregulated	protein_coding
ENSG00000126861.5	70.0098	9.19112	2.08969	4.39831	1.09098e-05	0.000409157	Upregulated	protein_coding
ENSG00000126895.16	72.5931	6.91386	1.68072	4.11364	3.8947e-05	0.00105209	Upregulated	protein_coding
ENSG00000126903.16	293.355	-1.58629	0.497635	-3.18766	0.00143429	0.0153845	Downregulated	protein_coding
ENSG00000127022.16	7108.54	6.73807	1.46078	4.61267	3.97536e-06	0.000187846	Upregulated	protein_coding
ENSG00000127083.8	69.0004	9.05493	1.97494	4.5849	4.54196e-06	0.000207897	Upregulated	protein_coding
ENSG00000127311.10	1026.16	1.58672	0.495757	3.20059	0.00137145	0.0149237	Upregulated	protein_coding
ENSG00000127554.13	31.8485	8.37619	2.13645	3.9206	8.83273e-05	0.00192141	Upregulated	protein_coding
ENSG00000127561.16	14.4371	6.25499	2.28967	2.73183	0.00629827	0.042995	Upregulated	protein_coding
ENSG00000127564.17	298.881	-4.78385	0.857062	-5.58168	2.38201e-08	4.79403e-06	Downregulated	protein_coding
ENSG00000127580.17	159.166	-2.3366	0.79635	-2.93414	0.00334468	0.0279856	Downregulated	protein_coding
ENSG00000127586.17	520.134	-2.29387	0.742142	-3.09088	0.00199566	0.0195307	Downregulated	protein_coding
ENSG00000127774.7	53.6308	-4.65371	1.63423	-2.84765	0.00440437	0.033825	Downregulated	protein_coding
ENSG00000127838.15	484.846	-1.9612	0.572103	-3.42805	0.000607932	0.00834364	Downregulated	protein_coding
ENSG00000127954.13	608.458	2.74518	0.975196	2.815	0.00487767	0.0361134	Upregulated	protein_coding
ENSG00000128000.17	619.87	7.3495	1.44462	5.08749	3.62834e-07	2.99477e-05	Upregulated	protein_coding
ENSG00000128011.5	44.9331	5.32253	1.26812	4.19718	2.70254e-05	0.00079523	Upregulated	protein_coding
ENSG00000128218.8	131.665	-3.9296	1.21732	-3.22807	0.00124628	0.0139901	Downregulated	protein_coding
ENSG00000128245.15	967.097	-2.19408	0.633779	-3.4619	0.000536383	0.00761521	Downregulated	protein_coding
ENSG00000128268.12	637.546	-3.42654	1.01816	-3.36544	0.000764224	0.00983346	Downregulated	protein_coding
ENSG00000128274.17	293.685	-3.94319	1.47463	-2.67403	0.00749461	0.0482057	Downregulated	protein_coding
ENSG00000128512.24	252.348	1.58425	0.562433	2.81679	0.00485061	0.0360446	Upregulated	protein_coding
ENSG00000128591.16	4.97533	6.24007	2.22338	2.80657	0.00500719	0.0367013	Upregulated	protein_coding
ENSG00000128626.12	130.435	9.97654	2.10045	4.74971	2.03713e-06	0.000114518	Upregulated	protein_coding
ENSG00000128683.14	149.272	-2.42076	0.899918	-2.68997	0.00714576	0.0466563	Downregulated	protein_coding
ENSG00000128694.12	203.908	1.78134	0.589963	3.01941	0.00253266	0.0231291	Upregulated	protein_coding
ENSG00000128708.13	1374.66	7.99932	1.39702	5.72599	1.02834e-08	2.6814e-06	Upregulated	protein_coding
ENSG00000128731.18	1893.72	3.4773	0.846084	4.10988	3.95871e-05	0.00105961	Upregulated	protein_coding
ENSG00000128891.17	388.044	-1.7686	0.54402	-3.25098	0.00115007	0.0132698	Downregulated	protein_coding
ENSG00000128918.15	82.0208	4.62255	1.48329	3.11641	0.00183067	0.0183241	Upregulated	protein_coding
ENSG00000128965.13	25.6071	-4.49475	1.56533	-2.87145	0.00408594	0.0320708	Downregulated	protein_coding
ENSG00000128973.13	274.724	-2.43227	0.661965	-3.67432	0.000238483	0.00413387	Downregulated	protein_coding
ENSG00000129159.9	39.8823	8.33472	2.21113	3.76944	0.000163617	0.00306375	Upregulated	protein_coding
ENSG00000129173.13	440.29	-3.16674	1.02602	-3.08644	0.00202569	0.019722	Downregulated	protein_coding
ENSG00000129244.9	513.62	-5.23894	1.22993	-4.25953	2.04853e-05	0.00065229	Downregulated	protein_coding
ENSG00000129465.16	123.286	6.96572	1.59113	4.37785	1.19855e-05	0.000440722	Upregulated	protein_coding
ENSG00000129467.14	80.7758	5.46694	1.33138	4.10621	4.02206e-05	0.00107113	Upregulated	protein_coding
ENSG00000129484.14	229.726	4.39702	1.17906	3.72925	0.000192049	0.00346806	Upregulated	protein_coding
ENSG00000129515.20	2248.23	1.90162	0.648689	2.93148	0.00337347	0.0281394	Upregulated	protein_coding
ENSG00000129535.13	24.749	4.15023	1.42869	2.90492	0.00367352	0.0298328	Upregulated	protein_coding
ENSG00000129559.13	558.439	7.5578	1.40716	5.37095	7.83229e-08	1.06994e-05	Upregulated	protein_coding
ENSG00000129566.13	1549.19	6.304	1.10903	5.68423	1.31401e-08	3.11784e-06	Upregulated	protein_coding
ENSG00000129673.10	25.7973	5.69117	2.02376	2.81218	0.00492067	0.0362789	Upregulated	protein_coding
ENSG00000129757.15	56.8193	4.47139	1.64671	2.71534	0.0066207	0.0445213	Upregulated	protein_coding
ENSG00000129911.9	419.993	-2.90353	1.03717	-2.79949	0.00511835	0.0372674	Downregulated	protein_coding
ENSG00000129993.15	386.922	-2.91593	0.955944	-3.05031	0.00228603	0.021487	Downregulated	protein_coding
ENSG00000130023.16	498.645	5.05002	1.2019	4.20169	2.64928e-05	0.000783051	Upregulated	protein_coding
ENSG00000130167.14	30.2509	6.13701	1.97236	3.11151	0.00186133	0.0185433	Upregulated	protein_coding
ENSG00000130175.10	1417.83	-2.13036	0.720049	-2.95863	0.00309012	0.0265898	Downregulated	protein_coding
ENSG00000130234.13	17.1452	6.26379	2.31974	2.70021	0.00692964	0.045778	Upregulated	protein_coding
ENSG00000130309.12	1646.37	-1.59072	0.543006	-2.92947	0.0033954	0.0282704	Downregulated	protein_coding
ENSG00000130402.14	1844.92	10.2467	1.72532	5.93899	2.86778e-09	1.20014e-06	Upregulated	protein_coding
ENSG00000130508.11	153.097	-3.47841	1.0259	-3.39058	0.000697436	0.00920316	Downregulated	protein_coding
ENSG00000130589.16	1932.6	-1.47238	0.540164	-2.7258	0.00641452	0.0434753	Downregulated	protein_coding
ENSG00000130592.17	2451.45	12.9649	2.12773	6.09331	1.10599e-09	6.88234e-07	Upregulated	protein_coding
ENSG00000130595.20	83.9723	9.29484	1.69653	5.47872	4.28409e-08	6.8872e-06	Upregulated	protein_coding
ENSG00000130598.17	42.9172	8.51529	2.1031	4.04892	5.14552e-05	0.00128103	Upregulated	protein_coding
ENSG00000130684.14	216.815	-2.13036	0.772668	-2.75715	0.00583076	0.0408654	Downregulated	protein_coding
ENSG00000130702.15	345.82	-4.04593	0.998527	-4.0519	5.08038e-05	0.00127082	Downregulated	protein_coding
ENSG00000130726.12	2303.93	-2.0536	0.703864	-2.91761	0.00352721	0.0290498	Downregulated	protein_coding
ENSG00000130734.10	1001.84	-2.83457	0.820744	-3.45366	0.000553043	0.00780567	Downregulated	protein_coding
ENSG00000130749.10	983.619	-2.27438	0.818963	-2.77714	0.00548392	0.0392357	Downregulated	protein_coding
ENSG00000130755.13	1757.76	7.71359	1.04754	7.36353	1.79109e-13	1.48614e-09	Upregulated	protein_coding
ENSG00000130766.5	155.256	9.96398	2.12579	4.6872	2.76973e-06	0.000143465	Upregulated	protein_coding
ENSG00000130770.18	596.047	11.7727	2.23142	5.27586	1.32138e-07	1.48882e-05	Upregulated	protein_coding
ENSG00000130772.14	78.4378	7.76127	1.96122	3.95736	7.57835e-05	0.00172985	Upregulated	protein_coding
ENSG00000130943.7	27.5494	3.30231	1.03272	3.19766	0.00138545	0.0150505	Upregulated	protein_coding
ENSG00000130956.14	190.166	1.94949	0.655837	2.97252	0.00295366	0.0257905	Upregulated	protein_coding
ENSG00000130985.17	2279.62	-1.60768	0.549713	-2.92457	0.00344928	0.0285527	Downregulated	protein_coding
ENSG00000131018.25	18762.6	1.57688	0.556252	2.83483	0.00458496	0.0347964	Upregulated	protein_coding
ENSG00000131042.15	887.08	2.47512	0.806437	3.0692	0.00214631	0.0205176	Upregulated	protein_coding
ENSG00000131149.19	2749.58	-2.37176	0.680042	-3.48767	0.000487248	0.00711313	Downregulated	protein_coding
ENSG00000131171.13	8662.56	1.73027	0.612402	2.82538	0.00472252	0.0355427	Upregulated	protein_coding
ENSG00000131351.15	248.129	-1.41631	0.52822	-2.68128	0.00733414	0.0474747	Downregulated	protein_coding
ENSG00000131408.15	1274.52	-2.03027	0.693172	-2.92896	0.00340101	0.0282863	Downregulated	protein_coding
ENSG00000131467.12	893.172	-1.21662	0.395963	-3.07255	0.00212235	0.0203549	Downregulated	protein_coding
ENSG00000131469.15	5621.69	2.60354	0.837053	3.11037	0.00186856	0.0185764	Upregulated	protein_coding
ENSG00000131626.19	770.912	7.37094	1.09026	6.76071	1.3732e-11	3.29132e-08	Upregulated	protein_coding
ENSG00000131686.15	80.1498	6.96194	1.32773	5.2435	1.57555e-07	1.66824e-05	Upregulated	protein_coding
ENSG00000131969.15	91.4955	5.76704	1.60294	3.5978	0.000320921	0.00515291	Upregulated	protein_coding
ENSG00000132003.10	23.5211	7.57387	2.24845	3.36848	0.000755836	0.00975888	Upregulated	protein_coding
ENSG00000132005.9	107.697	8.61243	2.02549	4.25202	2.11853e-05	0.000671334	Upregulated	protein_coding
ENSG00000132017.11	245.336	9.47537	1.87976	5.04073	4.6377e-07	3.544e-05	Upregulated	protein_coding
ENSG00000132024.18	127.902	8.73829	2.02238	4.3208	1.55462e-05	0.000532998	Upregulated	protein_coding
ENSG00000132207.18	4.62279	-5.63722	2.05665	-2.74097	0.00612586	0.0422465	Downregulated	protein_coding
ENSG00000132361.18	756.293	-1.9398	0.67358	-2.87984	0.00397879	0.0315301	Downregulated	protein_coding
ENSG00000132394.11	92.6138	6.20868	1.21253	5.12045	3.04814e-07	2.62628e-05	Upregulated	protein_coding
ENSG00000132464.13	26.8415	6.50087	2.04277	3.18238	0.00146072	0.0155604	Upregulated	protein_coding
ENSG00000132507.18	1831.06	10.0935	1.84492	5.47096	4.47602e-08	7.09802e-06	Upregulated	protein_coding
ENSG00000132522.16	67.0915	8.81455	2.03642	4.32845	1.50161e-05	0.000522983	Upregulated	protein_coding
ENSG00000132530.17	898.135	-2.10321	0.605803	-3.47177	0.000517046	0.00742479	Downregulated	protein_coding
ENSG00000132541.11	821.762	2.7725	0.883626	3.13764	0.00170317	0.0173643	Upregulated	protein_coding
ENSG00000132561.14	68.2703	3.744	1.21549	3.08024	0.00206831	0.0199967	Upregulated	protein_coding
ENSG00000132613.16	129.182	-4.0392	1.50007	-2.69267	0.0070882	0.0464068	Downregulated	protein_coding
ENSG00000132670.21	6099.37	1.80794	0.673661	2.68375	0.00728018	0.0472294	Upregulated	protein_coding
ENSG00000132716.19	2668.64	-1.28644	0.411903	-3.12315	0.00178926	0.0180604	Downregulated	protein_coding
ENSG00000132763.15	64.5377	-1.76242	0.605756	-2.90946	0.00362048	0.0295491	Downregulated	protein_coding
ENSG00000132849.22	1210.97	1.5767	0.526188	2.99646	0.00273132	0.0244023	Upregulated	protein_coding
ENSG00000132855.5	14.142	6.99961	2.19565	3.18794	0.00143289	0.0153758	Upregulated	protein_coding
ENSG00000132881.12	21.7138	7.46694	2.21405	3.37252	0.000744827	0.0096593	Upregulated	protein_coding
ENSG00000133065.11	431.435	-2.47311	0.905931	-2.72991	0.00633509	0.0431284	Downregulated	protein_coding
ENSG00000133069.17	22900.4	-2.33771	0.767417	-3.0462	0.0023175	0.0216691	Downregulated	protein_coding
ENSG00000133105.8	14.3291	7.16758	2.47663	2.89409	0.00380261	0.0305007	Upregulated	protein_coding
ENSG00000133247.14	252.652	-3.15853	0.881895	-3.58152	0.000341595	0.0054254	Downregulated	protein_coding
ENSG00000133265.11	156.187	-2.54639	0.794211	-3.20619	0.00134507	0.014727	Downregulated	protein_coding
ENSG00000133321.11	448.185	1.8086	0.653883	2.76595	0.0056758	0.0400435	Upregulated	protein_coding
ENSG00000133392.18	162.738	10.5637	2.11777	4.98813	6.09657e-07	4.36554e-05	Upregulated	protein_coding
ENSG00000133393.13	926.37	5.1921	1.27871	4.06041	4.89865e-05	0.00123721	Upregulated	protein_coding
ENSG00000133398.4	203.137	10.2685	2.13648	4.80626	1.53776e-06	9.15193e-05	Upregulated	protein_coding
ENSG00000133460.20	74.221	9.52265	2.06894	4.60268	4.17086e-06	0.000194447	Upregulated	protein_coding
ENSG00000133561.15	1097.1	2.47758	0.916753	2.70256	0.00688086	0.0456043	Upregulated	protein_coding
ENSG00000133962.8	48.5058	8.29956	1.98752	4.17583	2.96899e-05	0.000851769	Upregulated	protein_coding
ENSG00000134030.14	73.4656	5.49691	1.58602	3.46586	0.000528542	0.0075243	Upregulated	protein_coding
ENSG00000134056.12	327.938	4.14357	1.0882	3.80774	0.000140245	0.00272977	Upregulated	protein_coding
ENSG00000134058.12	388.58	5.86823	1.19014	4.93072	8.19259e-07	5.48218e-05	Upregulated	protein_coding
ENSG00000134183.13	75.7754	6.28626	1.45589	4.3178	1.57592e-05	0.0005382	Upregulated	protein_coding
ENSG00000134202.12	106.92	3.32442	0.790533	4.20529	2.60743e-05	0.000778538	Upregulated	protein_coding
ENSG00000134245.18	42.945	2.81469	0.989516	2.84451	0.00444799	0.0340055	Upregulated	protein_coding
ENSG00000134287.10	629.74	-2.29173	0.76093	-3.01175	0.00259748	0.023477	Downregulated	protein_coding
ENSG00000134333.15	2894.83	14.1266	2.52216	5.601	2.1312e-08	4.38977e-06	Upregulated	protein_coding
ENSG00000134460.19	92.1498	2.17797	0.736326	2.95789	0.00309748	0.0266357	Upregulated	protein_coding
ENSG00000134516.20	10015.6	1.07838	0.380251	2.83597	0.00456863	0.0347206	Upregulated	protein_coding
ENSG00000134545.14	209.483	3.1827	0.972928	3.27125	0.00107072	0.0125244	Upregulated	protein_coding
ENSG00000134551.13	34.7827	8.25418	2.03143	4.06324	4.83959e-05	0.00122688	Upregulated	protein_coding
ENSG00000134690.11	414.837	-3.187	1.1285	-2.82411	0.00474128	0.0356136	Downregulated	protein_coding
ENSG00000134765.10	145.428	5.48735	1.12333	4.8849	1.03484e-06	6.59021e-05	Upregulated	protein_coding
ENSG00000134812.8	5.44805	6.65592	2.15584	3.08739	0.00201924	0.0196689	Upregulated	protein_coding
ENSG00000134824.14	564.529	-2.32363	0.83175	-2.79367	0.00521135	0.0377569	Downregulated	protein_coding
ENSG00000134962.7	106.525	9.87898	2.00698	4.9223	8.55308e-07	5.63755e-05	Upregulated	protein_coding
ENSG00000134986.14	302.455	-3.48049	1.03823	-3.35232	0.000801359	0.0101772	Downregulated	protein_coding
ENSG00000135069.14	103.988	-3.64472	0.909859	-4.00581	6.18043e-05	0.00147806	Downregulated	protein_coding
ENSG00000135144.8	537.079	-3.95042	1.15281	-3.42677	0.000610814	0.00836143	Downregulated	protein_coding
ENSG00000135315.12	1419.27	1.98723	0.677897	2.93146	0.00337375	0.0281394	Upregulated	protein_coding
ENSG00000135318.12	400.797	2.12844	0.704452	3.02142	0.00251595	0.0230323	Upregulated	protein_coding
ENSG00000135407.11	117.676	2.21889	0.669121	3.31612	0.000912771	0.0112035	Upregulated	protein_coding
ENSG00000135436.8	24.9904	2.0604	0.742503	2.77494	0.00552115	0.0393952	Upregulated	protein_coding
ENSG00000135446.17	339.9	-3.02728	0.801585	-3.77662	0.000158972	0.00300021	Downregulated	protein_coding
ENSG00000135447.17	10.6644	6.46389	2.38739	2.70751	0.00677891	0.0451442	Upregulated	protein_coding
ENSG00000135451.13	624.478	-2.53652	0.914745	-2.77292	0.00555553	0.0395762	Downregulated	protein_coding
ENSG00000135638.14	15.1873	6.94152	2.20516	3.14785	0.00164474	0.0169256	Upregulated	protein_coding
ENSG00000135801.11	628.075	-1.09867	0.343274	-3.20058	0.00137152	0.0149237	Downregulated	protein_coding
ENSG00000135905.21	6130.9	1.31828	0.459757	2.86734	0.00413937	0.032317	Upregulated	protein_coding
ENSG00000135914.6	44.4288	5.89909	1.84364	3.1997	0.00137571	0.014957	Upregulated	protein_coding
ENSG00000135916.16	546.221	-2.19041	0.750772	-2.91754	0.00352802	0.0290498	Downregulated	protein_coding
ENSG00000135940.7	968.918	12.6191	2.53828	4.97152	6.64289e-07	4.6211e-05	Upregulated	protein_coding
ENSG00000135951.16	358.27	1.75793	0.542045	3.24314	0.00118218	0.0135084	Upregulated	protein_coding
ENSG00000135976.21	2063.7	7.52262	1.37509	5.47062	4.48459e-08	7.09802e-06	Upregulated	protein_coding
ENSG00000136002.21	13.9078	5.12823	1.52535	3.36201	0.000773786	0.00991638	Upregulated	protein_coding
ENSG00000136014.12	74.4794	2.43398	0.798396	3.04859	0.00229919	0.0215737	Upregulated	protein_coding
ENSG00000136111.14	1219.49	2.16747	0.496235	4.36784	1.25484e-05	0.000456764	Upregulated	protein_coding
ENSG00000136206.5	28.3271	8.26728	1.99794	4.1379	3.505e-05	0.000967788	Upregulated	protein_coding
ENSG00000136319.12	309.025	6.43991	1.10439	5.83121	5.50253e-09	1.86836e-06	Upregulated	protein_coding
ENSG00000136514.3	52.6101	8.90376	2.01438	4.4201	9.86545e-06	0.000380824	Upregulated	protein_coding
ENSG00000136699.20	492.486	5.95318	1.45303	4.09708	4.18388e-05	0.00110198	Upregulated	protein_coding
ENSG00000136932.15	770.935	1.24901	0.436187	2.86347	0.00419027	0.032637	Upregulated	protein_coding
ENSG00000136936.11	422.295	1.89538	0.59929	3.16272	0.00156304	0.0163206	Upregulated	protein_coding
ENSG00000137154.13	32134	1.9254	0.70242	2.7411	0.00612338	0.0422404	Upregulated	protein_coding
ENSG00000137221.14	423.745	-2.08774	0.703696	-2.96682	0.00300898	0.0261476	Downregulated	protein_coding
ENSG00000137265.16	2285.96	-2.58265	0.894053	-2.8887	0.00386835	0.0308166	Downregulated	protein_coding
ENSG00000137266.15	1797.36	-2.86399	0.853531	-3.35546	0.000792337	0.0100918	Downregulated	protein_coding
ENSG00000137309.21	1648.2	-3.92089	0.751434	-5.21787	1.8099e-07	1.82828e-05	Downregulated	protein_coding
ENSG00000137310.13	398.952	7.15724	1.23694	5.78623	7.19857e-09	2.23283e-06	Upregulated	protein_coding
ENSG00000137312.15	688.339	11.0033	2.13292	5.15878	2.48568e-07	2.27962e-05	Upregulated	protein_coding
ENSG00000137331.12	37.6078	5.85978	1.81827	3.22273	0.00126975	0.0141578	Upregulated	protein_coding
ENSG00000137337.16	313.263	8.3425	1.85729	4.49175	7.06406e-06	0.000295626	Upregulated	protein_coding
ENSG00000137343.18	53.513	8.7891	2.00473	4.38417	1.16428e-05	0.000431127	Upregulated	protein_coding
ENSG00000137404.15	43.6408	8.47079	2.04108	4.15015	3.32255e-05	0.00092894	Upregulated	protein_coding
ENSG00000137460.10	4326.85	-3.31768	0.868831	-3.81856	0.000134234	0.00264702	Downregulated	protein_coding
ENSG00000137500.10	780.186	1.17609	0.417451	2.81731	0.00484271	0.0360303	Upregulated	protein_coding
ENSG00000137501.18	1333.01	2.25195	0.819199	2.74896	0.00597838	0.0415336	Upregulated	protein_coding
ENSG00000137642.13	16036.5	1.54742	0.479725	3.22563	0.00125696	0.0140841	Upregulated	protein_coding
ENSG00000137700.19	247.019	5.59577	1.53498	3.64549	0.000266883	0.00449609	Upregulated	protein_coding
ENSG00000137760.15	326.282	1.43945	0.44924	3.20419	0.00135442	0.0147865	Upregulated	protein_coding
ENSG00000137776.17	4104.95	1.51841	0.463492	3.27603	0.00105278	0.0123692	Upregulated	protein_coding
ENSG00000137809.17	28.205	3.48642	1.16657	2.98861	0.00280248	0.0248863	Upregulated	protein_coding
ENSG00000137818.12	7235.07	-1.16921	0.417479	-2.80065	0.00509997	0.0372016	Downregulated	protein_coding
ENSG00000137857.18	57.1027	5.35612	1.67742	3.19307	0.00140769	0.0151746	Upregulated	protein_coding
ENSG00000137941.17	145.661	1.60431	0.539724	2.97246	0.00295419	0.0257905	Upregulated	protein_coding
ENSG00000138079.14	26.9697	3.51931	1.13773	3.09327	0.00197967	0.0194463	Upregulated	protein_coding
ENSG00000138092.11	445.029	-2.5276	0.85021	-2.97291	0.0029499	0.0257786	Downregulated	protein_coding
ENSG00000138131.4	72.645	3.71785	1.39767	2.66004	0.00781308	0.0496127	Upregulated	protein_coding
ENSG00000138193.17	155.394	4.48446	1.06316	4.21806	2.46408e-05	0.000749315	Upregulated	protein_coding
ENSG00000138326.21	25019	2.55449	0.765596	3.3366	0.000848105	0.0105897	Upregulated	protein_coding
ENSG00000138378.19	1721.47	2.50989	0.620093	4.0476	5.17449e-05	0.00128461	Upregulated	protein_coding
ENSG00000138623.10	289.452	10.6647	2.23192	4.77826	1.76819e-06	0.000101565	Upregulated	protein_coding
ENSG00000138629.16	1114.1	12.1139	2.18489	5.54437	2.95017e-08	5.43926e-06	Upregulated	protein_coding
ENSG00000138709.20	1960.72	1.9982	0.742635	2.69068	0.00713055	0.04658	Upregulated	protein_coding
ENSG00000139116.19	221.128	2.72822	0.878785	3.10453	0.00190581	0.0188521	Upregulated	protein_coding
ENSG00000139146.14	763.5	6.81048	1.22417	5.56337	2.64615e-08	5.0924e-06	Upregulated	protein_coding
ENSG00000139178.12	295.179	7.21707	1.41723	5.09236	3.53629e-07	2.95045e-05	Upregulated	protein_coding
ENSG00000139182.15	290.564	5.17609	1.24001	4.17423	2.98999e-05	0.000855377	Upregulated	protein_coding
ENSG00000139187.10	488.01	2.01932	0.672885	3.00099	0.002691	0.0240993	Upregulated	protein_coding
ENSG00000139194.8	32.6935	8.06536	2.00707	4.01849	5.85735e-05	0.00141808	Upregulated	protein_coding
ENSG00000139197.11	275.654	5.41625	1.29063	4.1966	2.70953e-05	0.000795511	Upregulated	protein_coding
ENSG00000139209.16	23.0667	6.65309	2.15209	3.09145	0.00199181	0.0195077	Upregulated	protein_coding
ENSG00000139351.15	53.7133	5.13849	0.97012	5.29676	1.17876e-07	1.38741e-05	Upregulated	protein_coding
ENSG00000139514.13	2838.08	-2.58694	0.800826	-3.23034	0.00123642	0.0139189	Downregulated	protein_coding
ENSG00000139537.11	91.7719	4.64368	1.0232	4.53837	5.66896e-06	0.000247454	Upregulated	protein_coding
ENSG00000139625.13	390.424	1.9192	0.627832	3.05687	0.00223658	0.0211732	Upregulated	protein_coding
ENSG00000139679.16	672.305	2.44255	0.850816	2.87083	0.00409399	0.0320957	Upregulated	protein_coding
ENSG00000139714.12	68.0737	3.30205	0.961202	3.43534	0.000591817	0.00819069	Upregulated	protein_coding
ENSG00000139718.12	1740.68	-2.44562	0.887114	-2.75683	0.00583643	0.0408923	Downregulated	protein_coding
ENSG00000139725.8	331.181	-2.91196	0.929378	-3.13324	0.0017289	0.0175722	Downregulated	protein_coding
ENSG00000139780.8	16.1438	7.39159	2.36865	3.12059	0.00180491	0.0181766	Upregulated	protein_coding
ENSG00000139899.11	53.2398	-3.17027	1.1729	-2.70294	0.00687297	0.0455634	Downregulated	protein_coding
ENSG00000139908.15	111.416	9.57359	2.08008	4.60251	4.17436e-06	0.000194447	Upregulated	protein_coding
ENSG00000139914.7	50.1078	7.297	1.93604	3.76903	0.000163883	0.00306656	Upregulated	protein_coding
ENSG00000139988.10	13.6394	6.67433	2.26723	2.94382	0.00324184	0.0274495	Upregulated	protein_coding
ENSG00000140157.16	613.025	3.39076	0.994858	3.40828	0.00065373	0.00877129	Upregulated	protein_coding
ENSG00000140263.15	251.933	-1.8972	0.542724	-3.4957	0.000472823	0.00697984	Downregulated	protein_coding
ENSG00000140464.20	901.331	-2.68287	0.841964	-3.18644	0.00144033	0.0154089	Downregulated	protein_coding
ENSG00000140522.12	29.3254	7.45966	1.93102	3.86307	0.000111969	0.00229969	Upregulated	protein_coding
ENSG00000140632.17	2348.31	-1.1149	0.408225	-2.7311	0.00631229	0.0430257	Downregulated	protein_coding
ENSG00000140694.18	2335.77	10.6498	1.32146	8.05915	7.68237e-16	2.02546e-11	Upregulated	protein_coding
ENSG00000140740.11	2670.08	4.17577	1.1904	3.50787	0.000451709	0.00674366	Upregulated	protein_coding
ENSG00000140743.8	744.677	8.40404	1.4573	5.76685	8.07649e-09	2.44503e-06	Upregulated	protein_coding
ENSG00000140749.9	675.429	7.10253	1.42532	4.9831	6.25725e-07	4.41862e-05	Upregulated	protein_coding
ENSG00000140750.17	637.299	3.56327	1.0821	3.29291	0.000991548	0.0118495	Upregulated	protein_coding
ENSG00000140832.11	15.0441	6.43417	2.21485	2.90501	0.0036724	0.0298328	Upregulated	protein_coding
ENSG00000140854.13	304.448	-1.73049	0.63309	-2.7334	0.0062685	0.0428936	Downregulated	protein_coding
ENSG00000140905.11	14.2851	6.47217	2.04832	3.15975	0.00157907	0.0164424	Upregulated	protein_coding
ENSG00000140988.16	15828.4	8.50148	1.40446	6.05321	1.4199e-09	8.31903e-07	Upregulated	protein_coding
ENSG00000140990.15	478.438	11.6334	2.19989	5.28818	1.2354e-07	1.42233e-05	Upregulated	protein_coding
ENSG00000140992.19	793.334	-1.57419	0.547102	-2.87733	0.00401057	0.0316432	Downregulated	protein_coding
ENSG00000141179.14	8859.27	3.49629	0.871469	4.01196	6.02177e-05	0.0014499	Upregulated	protein_coding
ENSG00000141252.21	1155.02	5.27307	1.14054	4.62333	3.77631e-06	0.000180041	Upregulated	protein_coding
ENSG00000141404.17	73.7771	1.95467	0.619503	3.15522	0.00160375	0.0166272	Upregulated	protein_coding
ENSG00000141446.11	1509	1.23899	0.433831	2.85594	0.00429102	0.0332255	Upregulated	protein_coding
ENSG00000141449.16	116.939	7.38204	1.69314	4.35998	1.30074e-05	0.00046786	Upregulated	protein_coding
ENSG00000141485.17	7.33937	6.62306	2.44498	2.70884	0.00675192	0.0451294	Upregulated	protein_coding
ENSG00000141510.18	828.792	-2.38041	0.858422	-2.77301	0.00555401	0.0395761	Downregulated	protein_coding
ENSG00000141527.19	31.7837	7.94026	2.04296	3.88664	0.000101642	0.00214212	Upregulated	protein_coding
ENSG00000141543.12	1140.3	11.6626	2.20116	5.2984	1.16823e-07	1.38164e-05	Upregulated	protein_coding
ENSG00000141562.19	3808.56	-2.11712	0.620808	-3.41027	0.000648984	0.00871204	Downregulated	protein_coding
ENSG00000141579.7	29.5711	7.71496	2.23808	3.44714	0.000566551	0.00793262	Upregulated	protein_coding
ENSG00000141644.19	1344.04	-1.14224	0.417603	-2.73523	0.00623376	0.0427506	Downregulated	protein_coding
ENSG00000141854.10	13.2337	7.07656	2.13518	3.31426	0.000918845	0.0112624	Upregulated	protein_coding
ENSG00000141858.12	120.85	5.74224	1.53031	3.75235	0.000175185	0.00321864	Upregulated	protein_coding
ENSG00000141873.11	307.692	-2.84441	0.651164	-4.36819	1.25282e-05	0.000456764	Downregulated	protein_coding
ENSG00000141965.5	1088.71	-4.02651	1.32505	-3.03877	0.00237545	0.022044	Downregulated	protein_coding
ENSG00000142089.17	414.929	-2.0903	0.695322	-3.00623	0.0026451	0.0237781	Downregulated	protein_coding
ENSG00000142188.17	630.023	6.69546	1.25304	5.34337	9.12362e-08	1.20555e-05	Upregulated	protein_coding
ENSG00000142279.13	14.3291	7.21787	2.48655	2.90276	0.0036989	0.0299605	Upregulated	protein_coding
ENSG00000142534.7	36914	2.14576	0.729433	2.94168	0.0032644	0.0275499	Upregulated	protein_coding
ENSG00000142632.17	36.1636	8.26263	2.07983	3.97275	7.1048e-05	0.00164603	Upregulated	protein_coding
ENSG00000142669.15	1694.4	-2.43731	0.889026	-2.74155	0.00611507	0.0422052	Downregulated	protein_coding
ENSG00000142676.14	20097.6	2.45544	0.776585	3.16185	0.00156772	0.016363	Upregulated	protein_coding
ENSG00000143036.17	16.1828	5.01628	1.81086	2.7701	0.00560384	0.0397485	Upregulated	protein_coding
ENSG00000143258.17	387.286	-1.57086	0.566693	-2.77197	0.00557182	0.0396328	Downregulated	protein_coding
ENSG00000143294.15	527.131	-2.16401	0.654192	-3.30791	0.000939933	0.0114516	Downregulated	protein_coding
ENSG00000143368.10	495.921	-2.64478	0.83785	-3.15662	0.00159607	0.0165802	Downregulated	protein_coding
ENSG00000143412.10	60.6396	4.43666	1.16699	3.80179	0.000143655	0.00276659	Upregulated	protein_coding
ENSG00000143418.20	1327.52	-1.72271	0.478031	-3.60376	0.000313651	0.00507637	Downregulated	protein_coding
ENSG00000143443.10	88.4054	2.52578	0.894753	2.82288	0.00475945	0.0356725	Upregulated	protein_coding
ENSG00000143552.10	173.392	3.96629	1.04921	3.78025	0.00015667	0.00296739	Upregulated	protein_coding
ENSG00000143554.14	162.526	6.34046	1.47184	4.30785	1.64846e-05	0.000552953	Upregulated	protein_coding
ENSG00000143614.11	850.423	2.23365	0.584775	3.81967	0.000133629	0.00263904	Upregulated	protein_coding
ENSG00000143624.14	722.176	4.4673	1.26589	3.52899	0.000417153	0.00636841	Upregulated	protein_coding
ENSG00000143627.19	101.985	7.23637	2.35153	3.0773	0.00208884	0.0201253	Upregulated	protein_coding
ENSG00000143641.10	893.362	-1.63662	0.56526	-2.89534	0.00378746	0.0304298	Downregulated	protein_coding
ENSG00000143702.16	1251.09	7.31988	1.33367	5.48854	4.05273e-08	6.61706e-06	Upregulated	protein_coding
ENSG00000143727.16	14207.5	2.17649	0.789673	2.75619	0.00584797	0.0409469	Upregulated	protein_coding
ENSG00000143858.12	44.6378	5.31619	1.32773	4.00397	6.22875e-05	0.00148616	Upregulated	protein_coding
ENSG00000143891.17	245.977	1.89661	0.57657	3.28947	0.00100377	0.0119424	Upregulated	protein_coding
ENSG00000143921.9	20.9914	7.63412	1.77468	4.30169	1.69497e-05	0.000562112	Upregulated	protein_coding
ENSG00000143947.15	13440.8	2.55399	0.816564	3.12773	0.00176165	0.01785	Upregulated	protein_coding
ENSG00000143994.14	30.4308	2.59575	0.965589	2.68825	0.00718271	0.0467885	Upregulated	protein_coding
ENSG00000144034.16	323.461	11.0562	2.04095	5.41718	6.05476e-08	8.91809e-06	Upregulated	protein_coding
ENSG00000144036.16	1795.64	1.86263	0.653755	2.84912	0.00438401	0.0337155	Upregulated	protein_coding
ENSG00000144043.13	569.466	-2.12004	0.72941	-2.90651	0.00365482	0.0297222	Downregulated	protein_coding
ENSG00000144048.11	439.438	10.151	1.99138	5.09745	3.44263e-07	2.88143e-05	Upregulated	protein_coding
ENSG00000144199.12	70.1738	7.53392	1.947	3.8695	0.000109058	0.00226027	Upregulated	protein_coding
ENSG00000144290.17	185.23	3.62239	0.831045	4.35884	1.30753e-05	0.000468383	Upregulated	protein_coding
ENSG00000144452.15	6.86638	6.48271	2.41449	2.68492	0.00725475	0.047146	Upregulated	protein_coding
ENSG00000144560.16	380.971	-1.61295	0.517999	-3.1138	0.00184695	0.018445	Downregulated	protein_coding
ENSG00000144579.9	1550.73	-2.12109	0.785726	-2.69953	0.00694378	0.0458369	Downregulated	protein_coding
ENSG00000144668.12	228.359	7.0112	1.78512	3.92759	8.58008e-05	0.00188512	Upregulated	protein_coding
ENSG00000144741.19	570.944	5.40701	1.10346	4.90005	9.58106e-07	6.20651e-05	Upregulated	protein_coding
ENSG00000144792.9	48.252	8.16671	2.06461	3.95557	7.63527e-05	0.00173838	Upregulated	protein_coding
ENSG00000144891.19	197.534	5.28075	1.4995	3.52168	0.000428828	0.00647333	Upregulated	protein_coding
ENSG00000145425.10	19538.4	9.43688	1.46892	6.42436	1.32423e-10	1.74567e-07	Upregulated	protein_coding
ENSG00000145592.14	12125.1	2.70721	0.803229	3.37041	0.000750571	0.00970622	Upregulated	protein_coding
ENSG00000145649.8	465.936	2.83218	1.00102	2.82929	0.00466515	0.0352527	Upregulated	protein_coding
ENSG00000145721.12	68.5997	9.42132	2.36096	3.99047	6.5943e-05	0.00155564	Upregulated	protein_coding
ENSG00000145723.17	325.288	2.02139	0.631605	3.2004	0.00137236	0.0149267	Upregulated	protein_coding
ENSG00000145730.21	616.057	1.4853	0.539242	2.75442	0.00587969	0.0411298	Upregulated	protein_coding
ENSG00000145734.20	3210.6	14.7795	2.24478	6.58393	4.58168e-11	7.10565e-08	Upregulated	protein_coding
ENSG00000145757.16	67.0957	3.67847	1.11116	3.31048	0.000931376	0.0113684	Upregulated	protein_coding
ENSG00000145819.18	3688.66	1.32548	0.348303	3.80554	0.000141494	0.00274503	Upregulated	protein_coding
ENSG00000145975.15	51.9369	6.87942	2.03302	3.38384	0.000714794	0.00937589	Upregulated	protein_coding
ENSG00000145990.11	811.887	-1.06332	0.365581	-2.90856	0.00363094	0.0295919	Downregulated	protein_coding
ENSG00000146006.8	46.6357	3.20443	0.988567	3.24149	0.00118908	0.0135539	Upregulated	protein_coding
ENSG00000146063.20	602.192	-1.40441	0.479659	-2.92793	0.0034123	0.0283266	Downregulated	protein_coding
ENSG00000146109.5	370.724	4.09415	1.18661	3.45028	0.000560001	0.00787298	Upregulated	protein_coding
ENSG00000146112.12	560.037	12.2383	2.18689	5.59619	2.19118e-08	4.47833e-06	Upregulated	protein_coding
ENSG00000146197.9	74.4521	4.2935	1.14293	3.75659	0.000172243	0.00317788	Upregulated	protein_coding
ENSG00000146701.12	697.011	-1.23853	0.416859	-2.97111	0.00296728	0.0258534	Downregulated	protein_coding
ENSG00000146707.15	49.9176	8.266	1.96639	4.20365	2.62642e-05	0.000781554	Upregulated	protein_coding
ENSG00000146834.15	142.699	-1.93625	0.71393	-2.7121	0.00668588	0.0448304	Downregulated	protein_coding
ENSG00000146904.9	131.487	9.20708	1.92936	4.77209	1.82327e-06	0.000104501	Upregulated	protein_coding
ENSG00000147144.13	42.9758	8.11476	2.02727	4.00279	6.25993e-05	0.00148822	Upregulated	protein_coding
ENSG00000147174.12	355.421	1.77344	0.528107	3.3581	0.0007848	0.0100207	Upregulated	protein_coding
ENSG00000147251.16	6472.81	1.44769	0.483749	2.99265	0.00276565	0.0246422	Upregulated	protein_coding
ENSG00000147316.15	913.989	3.27895	0.942468	3.47911	0.000503085	0.00727184	Upregulated	protein_coding
ENSG00000147383.11	91.9426	3.90554	1.40251	2.78468	0.00535811	0.0385133	Upregulated	protein_coding
ENSG00000147394.20	198.756	6.22488	1.18302	5.26184	1.4262e-07	1.55379e-05	Upregulated	protein_coding
ENSG00000147400.10	852.24	11.5499	2.16244	5.34114	9.23656e-08	1.20555e-05	Upregulated	protein_coding
ENSG00000147509.14	24.6805	7.47666	2.32298	3.21856	0.00128835	0.0143104	Upregulated	protein_coding
ENSG00000147536.12	181.418	-2.14506	0.800698	-2.67899	0.00738442	0.047656	Downregulated	protein_coding
ENSG00000147604.14	24674.6	2.53327	0.767476	3.30078	0.000964181	0.0116477	Upregulated	protein_coding
ENSG00000147684.10	952.281	4.07996	1.42791	2.8573	0.00427257	0.0331215	Upregulated	protein_coding
ENSG00000147687.19	262.557	6.19064	1.22879	5.03798	4.70472e-07	3.544e-05	Upregulated	protein_coding
ENSG00000147896.4	25.437	8.04468	2.10688	3.81829	0.00013438	0.00264792	Upregulated	protein_coding
ENSG00000147905.18	2548.64	1.3778	0.517548	2.66218	0.0077637	0.0494182	Upregulated	protein_coding
ENSG00000147955.18	303.966	-1.53796	0.499241	-3.08059	0.0020659	0.0199807	Downregulated	protein_coding
ENSG00000148057.16	123.935	1.94687	0.555666	3.50367	0.000458891	0.00683032	Upregulated	protein_coding
ENSG00000148248.14	1324.99	10.7249	2.03704	5.26491	1.40256e-07	1.53437e-05	Upregulated	protein_coding
ENSG00000148290.10	251.44	10.8318	2.1344	5.07486	3.8778e-07	3.11224e-05	Upregulated	protein_coding
ENSG00000148291.10	97.5035	9.45727	2.0798	4.54719	5.43657e-06	0.000240092	Upregulated	protein_coding
ENSG00000148296.7	278.015	7.33477	1.47066	4.98742	6.11912e-07	4.36554e-05	Upregulated	protein_coding
ENSG00000148297.16	325.715	9.98896	2.06436	4.83877	1.30648e-06	8.01054e-05	Upregulated	protein_coding
ENSG00000148300.12	234.355	10.8126	2.13466	5.06525	4.07858e-07	3.21951e-05	Upregulated	protein_coding
ENSG00000148303.17	13159.3	4.46276	1.29798	3.43824	0.000585501	0.00811606	Upregulated	protein_coding
ENSG00000148331.12	563.075	-1.76181	0.636266	-2.76898	0.00562321	0.0398145	Downregulated	protein_coding
ENSG00000148826.9	10.0426	6.24218	1.99802	3.12418	0.00178303	0.0180114	Upregulated	protein_coding
ENSG00000148840.11	657.928	-2.37419	0.815447	-2.91153	0.00359668	0.029431	Downregulated	protein_coding
ENSG00000148848.15	89.5657	2.97668	1.01727	2.92616	0.00343173	0.028452	Upregulated	protein_coding
ENSG00000148908.15	12095.9	2.88524	0.828326	3.48321	0.000495431	0.00719671	Upregulated	protein_coding
ENSG00000148925.11	950.733	1.54247	0.501249	3.07724	0.00208925	0.0201253	Upregulated	protein_coding
ENSG00000149115.14	194.053	-3.20198	0.819565	-3.90692	9.34794e-05	0.00201026	Downregulated	protein_coding
ENSG00000149136.9	1539.68	-1.43476	0.537301	-2.67031	0.00757809	0.048591	Downregulated	protein_coding
ENSG00000149292.17	305.384	1.27637	0.42321	3.01592	0.00256197	0.023267	Upregulated	protein_coding
ENSG00000149311.20	20086.7	1.5572	0.489118	3.18369	0.00145412	0.0155215	Upregulated	protein_coding
ENSG00000149428.21	744.375	7.74636	1.51536	5.11188	3.18969e-07	2.73039e-05	Upregulated	protein_coding
ENSG00000149485.19	413.824	-1.44677	0.544712	-2.65603	0.00790662	0.049978	Downregulated	protein_coding
ENSG00000149503.13	937.946	-2.59683	0.83307	-3.11718	0.0018259	0.0182969	Downregulated	protein_coding
ENSG00000149527.18	239.929	4.15279	1.02586	4.04812	5.16299e-05	0.00128417	Upregulated	protein_coding
ENSG00000149548.15	999.835	1.84606	0.601346	3.06988	0.00214146	0.0204861	Upregulated	protein_coding
ENSG00000149573.9	57.7786	2.53989	0.923069	2.75157	0.00593108	0.0413248	Upregulated	protein_coding
ENSG00000149781.14	2366.94	-1.21053	0.429434	-2.8189	0.00481879	0.0358993	Downregulated	protein_coding
ENSG00000149925.22	274.462	-1.83052	0.653518	-2.80103	0.00509398	0.0371927	Downregulated	protein_coding
ENSG00000150527.18	1147.3	1.13044	0.41286	2.73808	0.00617996	0.0424973	Upregulated	protein_coding
ENSG00000150768.17	467.11	-1.07619	0.359727	-2.99167	0.00277454	0.0247048	Downregulated	protein_coding
ENSG00000150782.12	365.704	2.1807	0.759586	2.87091	0.00409295	0.0320957	Upregulated	protein_coding
ENSG00000151062.15	105.31	5.13536	1.26044	4.07425	4.61634e-05	0.00119206	Upregulated	protein_coding
ENSG00000151065.14	219.696	6.80412	1.18062	5.76319	8.25366e-09	2.44503e-06	Upregulated	protein_coding
ENSG00000151067.23	62.1767	9.25753	2.05305	4.50915	6.50866e-06	0.000278121	Upregulated	protein_coding
ENSG00000151150.22	777.524	1.96435	0.590904	3.32431	0.000886368	0.0109811	Upregulated	protein_coding
ENSG00000151466.12	5212	2.33371	0.71941	3.24392	0.00117896	0.013487	Upregulated	protein_coding
ENSG00000151623.15	455.347	2.4221	0.64542	3.75274	0.000174909	0.00321581	Upregulated	protein_coding
ENSG00000151655.19	16.1073	7.08224	2.21802	3.19304	0.00140782	0.0151746	Upregulated	protein_coding
ENSG00000151704.16	54.0042	9.11049	1.97364	4.6161	3.91025e-06	0.00018542	Upregulated	protein_coding
ENSG00000151715.8	40.0934	3.0051	1.00393	2.99334	0.0027594	0.0245948	Upregulated	protein_coding
ENSG00000152082.15	895.823	11.8947	2.09956	5.66532	1.46752e-08	3.36445e-06	Upregulated	protein_coding
ENSG00000152284.5	26.2755	7.35845	2.23228	3.29637	0.000979413	0.0117702	Upregulated	protein_coding
ENSG00000152291.15	3324.32	4.67686	0.981528	4.76488	1.88965e-06	0.000107837	Upregulated	protein_coding
ENSG00000152404.16	1290.23	1.56863	0.516494	3.03708	0.00238884	0.0221287	Upregulated	protein_coding
ENSG00000152495.11	2782.3	1.65126	0.62157	2.6566	0.00789321	0.0499411	Upregulated	protein_coding
ENSG00000152518.8	4037.92	-2.39784	0.901078	-2.66108	0.00778902	0.0495076	Downregulated	protein_coding
ENSG00000152763.17	240.126	2.30236	0.823043	2.79738	0.00515196	0.037455	Upregulated	protein_coding
ENSG00000152894.15	215.759	8.25823	1.60097	5.15827	2.49243e-07	2.27962e-05	Upregulated	protein_coding
ENSG00000152939.17	29.8537	6.57872	2.0008	3.28805	0.00100885	0.0119973	Upregulated	protein_coding
ENSG00000152942.19	987.474	6.9298	1.51931	4.56116	5.08715e-06	0.000226559	Upregulated	protein_coding
ENSG00000153002.12	200.776	6.34642	1.57363	4.03297	5.50752e-05	0.0013495	Upregulated	protein_coding
ENSG00000153046.18	7352.6	2.20223	0.799382	2.75492	0.00587067	0.0410885	Upregulated	protein_coding
ENSG00000153094.25	1378.22	-1.74456	0.62479	-2.79223	0.00523457	0.0378835	Downregulated	protein_coding
ENSG00000153283.13	1824.91	1.96612	0.58669	3.35121	0.000804599	0.0102036	Upregulated	protein_coding
ENSG00000153347.10	20.1508	4.13725	1.49255	2.77193	0.00557249	0.0396328	Upregulated	protein_coding
ENSG00000153395.10	987.685	3.44704	0.737179	4.67599	2.92535e-06	0.000150052	Upregulated	protein_coding
ENSG00000153406.14	242.61	9.50823	2.01701	4.71401	2.42887e-06	0.000130688	Upregulated	protein_coding
ENSG00000153443.13	623.071	-3.67789	1.10739	-3.32121	0.000896265	0.0110539	Downregulated	protein_coding
ENSG00000153485.6	46.8831	8.72791	1.92149	4.54227	5.56524e-06	0.000244546	Upregulated	protein_coding
ENSG00000153558.17	71.9446	5.56226	1.36403	4.07781	4.54613e-05	0.00117739	Upregulated	protein_coding
ENSG00000153802.12	16.2103	7.58532	2.47516	3.06458	0.00217979	0.0207398	Upregulated	protein_coding
ENSG00000153975.10	1092.26	1.70441	0.620294	2.74774	0.00600075	0.0416342	Upregulated	protein_coding
ENSG00000154027.19	317.669	3.10715	0.605054	5.13532	2.81661e-07	2.46711e-05	Upregulated	protein_coding
ENSG00000154118.13	20.9214	7.11936	2.39589	2.97149	0.00296355	0.0258465	Upregulated	protein_coding
ENSG00000154133.15	9.63595	-4.56878	1.51285	-3.01998	0.00252795	0.0231181	Downregulated	protein_coding
ENSG00000154146.13	494.753	-5.09506	1.58553	-3.21348	0.00131139	0.0144604	Downregulated	protein_coding
ENSG00000154175.19	44.7233	5.716	1.28584	4.44536	8.77465e-06	0.000349691	Upregulated	protein_coding
ENSG00000154265.16	1100.93	1.61607	0.492225	3.28318	0.00102643	0.0121462	Upregulated	protein_coding
ENSG00000154274.15	71.7243	8.85936	2.05282	4.3157	1.59095e-05	0.000539837	Upregulated	protein_coding
ENSG00000154328.16	243.327	4.70362	0.902642	5.21095	1.87875e-07	1.86918e-05	Upregulated	protein_coding
ENSG00000154359.13	563.302	5.16441	1.27681	4.04479	5.23692e-05	0.00129402	Upregulated	protein_coding
ENSG00000154370.16	789.77	-1.6228	0.607798	-2.66996	0.00758608	0.048628	Downregulated	protein_coding
ENSG00000154451.15	2462.34	2.29351	0.665746	3.44502	0.00057102	0.00795716	Upregulated	protein_coding
ENSG00000154589.7	126.188	2.44311	0.875946	2.78911	0.00528537	0.0381256	Upregulated	protein_coding
ENSG00000154760.14	1319.54	-1.08215	0.302324	-3.57943	0.000344341	0.00544604	Downregulated	protein_coding
ENSG00000154814.14	2794.6	2.48639	0.540212	4.60262	4.17218e-06	0.000194447	Upregulated	protein_coding
ENSG00000154822.18	10229.6	13.1173	1.78887	7.33275	2.25472e-13	1.48614e-09	Upregulated	protein_coding
ENSG00000154839.10	331.237	6.95157	1.72502	4.02986	5.58112e-05	0.00136121	Upregulated	protein_coding
ENSG00000154917.11	717.119	-2.5249	0.7739	-3.26256	0.0011041	0.0128486	Downregulated	protein_coding
ENSG00000154930.15	1485.46	-1.39761	0.487546	-2.86663	0.00414864	0.0323702	Downregulated	protein_coding
ENSG00000155008.16	374.573	-1.06861	0.363117	-2.94289	0.00325166	0.0274989	Downregulated	protein_coding
ENSG00000155189.12	680.409	9.11566	1.77019	5.14955	2.6111e-07	2.34955e-05	Upregulated	protein_coding
ENSG00000155368.18	572.773	2.423	0.784068	3.09029	0.00199962	0.0195549	Upregulated	protein_coding
ENSG00000155380.13	2509.23	9.42648	1.60672	5.86692	4.4396e-09	1.67214e-06	Upregulated	protein_coding
ENSG00000155754.15	58.8675	4.57892	1.35858	3.37038	0.000750654	0.00970622	Upregulated	protein_coding
ENSG00000155827.12	1364.4	1.10113	0.354452	3.10659	0.00189261	0.0187589	Upregulated	protein_coding
ENSG00000155974.14	76.5389	2.51942	0.813827	3.09577	0.00196303	0.0193132	Upregulated	protein_coding
ENSG00000156253.7	70.7986	8.00618	1.97267	4.05855	4.9379e-05	0.00124463	Upregulated	protein_coding
ENSG00000156256.15	1801.51	13.6068	2.58275	5.26834	1.37664e-07	1.52843e-05	Upregulated	protein_coding
ENSG00000156261.13	2444.51	12.4642	2.12859	5.85561	4.7527e-09	1.76486e-06	Upregulated	protein_coding
ENSG00000156265.17	472.654	12.768	2.08958	6.1103	9.94461e-10	6.88234e-07	Upregulated	protein_coding
ENSG00000156304.15	1626.96	-2.01177	0.726587	-2.7688	0.00562633	0.0398145	Downregulated	protein_coding
ENSG00000156467.10	5268.53	2.95163	0.837877	3.52274	0.000427103	0.00646416	Upregulated	protein_coding
ENSG00000156510.13	38.7285	2.39689	0.854492	2.80504	0.00503096	0.0368243	Upregulated	protein_coding
ENSG00000156650.14	1359.35	9.61472	1.57564	6.10212	1.04673e-09	6.88234e-07	Upregulated	protein_coding
ENSG00000156787.17	3546.64	1.99731	0.657119	3.0395	0.00236973	0.0219992	Upregulated	protein_coding
ENSG00000157017.16	83.0165	1.77715	0.579651	3.0659	0.00217017	0.0206781	Upregulated	protein_coding
ENSG00000157045.9	2818.78	9.49544	1.55881	6.09146	1.11883e-09	6.88234e-07	Upregulated	protein_coding
ENSG00000157191.20	982.989	7.93836	1.22219	6.49519	8.29292e-11	1.17853e-07	Upregulated	protein_coding
ENSG00000157216.17	1875.28	-2.42679	0.861395	-2.81728	0.00484322	0.0360303	Downregulated	protein_coding
ENSG00000157326.19	69.9669	6.07317	1.58323	3.83593	0.000125093	0.00251761	Upregulated	protein_coding
ENSG00000157379.14	188.727	7.24058	1.53504	4.71686	2.39518e-06	0.000129404	Upregulated	protein_coding
ENSG00000157551.19	651.666	2.99839	1.03634	2.89324	0.00381289	0.030546	Upregulated	protein_coding
ENSG00000157766.19	18.35	3.57842	1.22762	2.91491	0.00355788	0.029195	Upregulated	protein_coding
ENSG00000157870.17	66.058	6.37272	1.60979	3.95872	7.5352e-05	0.00172303	Upregulated	protein_coding
ENSG00000157873.18	749.693	4.83272	1.25685	3.8451	0.000120501	0.00244198	Upregulated	protein_coding
ENSG00000157881.16	323.529	4.84683	1.19113	4.0691	4.71944e-05	0.00121106	Upregulated	protein_coding
ENSG00000157890.19	113.716	2.96415	1.05129	2.81954	0.00480927	0.0358689	Upregulated	protein_coding
ENSG00000157999.6	168.979	5.52676	1.53555	3.59921	0.00031918	0.00513433	Upregulated	protein_coding
ENSG00000158411.11	598.23	1.91339	0.68346	2.79956	0.00511725	0.0372674	Upregulated	protein_coding
ENSG00000158555.15	1030.07	-2.74363	0.901895	-3.04207	0.00234953	0.021858	Downregulated	protein_coding
ENSG00000158865.13	9.19825	6.98071	2.44722	2.85251	0.0043376	0.0335271	Upregulated	protein_coding
ENSG00000158874.11	13.2269	6.28045	2.31251	2.71585	0.00661052	0.0444722	Upregulated	protein_coding
ENSG00000158941.17	1323.49	-1.54281	0.552755	-2.79114	0.0052523	0.0379389	Downregulated	protein_coding
ENSG00000159128.16	773.477	2.84683	0.803496	3.54305	0.00039553	0.00609564	Upregulated	protein_coding
ENSG00000159164.10	58.3442	-2.11494	0.75545	-2.79958	0.00511688	0.0372674	Downregulated	protein_coding
ENSG00000159256.13	38351.4	2.98516	0.871302	3.42609	0.000612336	0.00837356	Upregulated	protein_coding
ENSG00000159259.8	202.342	-1.63983	0.566377	-2.8953	0.003788	0.0304298	Downregulated	protein_coding
ENSG00000159314.13	801.412	4.24761	0.891284	4.76572	1.88184e-06	0.000107624	Upregulated	protein_coding
ENSG00000159335.19	983.154	-2.78994	1.0406	-2.68109	0.00733819	0.0474819	Downregulated	protein_coding
ENSG00000159339.13	1912.95	4.48067	1.28893	3.47628	0.000508429	0.007333	Upregulated	protein_coding
ENSG00000159363.19	135.929	4.46763	1.41912	3.14817	0.00164296	0.0169205	Upregulated	protein_coding
ENSG00000159388.6	2968.04	-2.26888	0.675556	-3.35854	0.000783558	0.0100187	Downregulated	protein_coding
ENSG00000159403.18	33.0493	6.54297	2.07767	3.14919	0.00163722	0.016906	Upregulated	protein_coding
ENSG00000159445.13	476.767	1.71504	0.582287	2.94536	0.00322582	0.0273847	Upregulated	protein_coding
ENSG00000159840.16	494.79	4.94204	0.735686	6.71759	1.84759e-11	4.05932e-08	Upregulated	protein_coding
ENSG00000159842.16	853.553	2.65647	0.705613	3.76477	0.000166705	0.00310056	Upregulated	protein_coding
ENSG00000159915.13	63.076	3.20782	0.931273	3.44455	0.000572001	0.00796661	Upregulated	protein_coding
ENSG00000159958.7	642.449	-2.90757	1.0249	-2.83693	0.004555	0.0346388	Downregulated	protein_coding
ENSG00000160117.16	1015	-3.19155	1.04776	-3.04607	0.00231855	0.0216691	Downregulated	protein_coding
ENSG00000160201.12	520.646	-1.70929	0.626879	-2.72666	0.00639786	0.043416	Downregulated	protein_coding
ENSG00000160229.13	334.484	1.76881	0.562143	3.14655	0.00165207	0.0169812	Upregulated	protein_coding
ENSG00000160298.18	654.46	-3.08103	0.899197	-3.42642	0.000611586	0.00836765	Downregulated	protein_coding
ENSG00000160307.10	75.049	3.77328	0.798277	4.72678	2.28111e-06	0.000124968	Upregulated	protein_coding
ENSG00000160321.16	63.5645	3.00384	0.965644	3.11071	0.00186636	0.0185685	Upregulated	protein_coding
ENSG00000160323.19	20.9955	7.67916	2.21334	3.46949	0.00052144	0.00747568	Upregulated	protein_coding
ENSG00000160325.15	60.4904	8.60104	2.11837	4.06022	4.90258e-05	0.00123721	Upregulated	protein_coding
ENSG00000160326.14	166.883	10.5527	2.11754	4.98348	6.24509e-07	4.41862e-05	Upregulated	protein_coding
ENSG00000160404.18	168.326	-1.8673	0.641292	-2.91178	0.00359375	0.0294252	Downregulated	protein_coding
ENSG00000160408.16	232.996	-2.54681	0.826218	-3.08249	0.00205278	0.0198976	Downregulated	protein_coding
ENSG00000160439.16	134.092	9.9387	2.09059	4.75401	1.9942e-06	0.000112536	Upregulated	protein_coding
ENSG00000160446.19	175.113	-2.79548	0.744765	-3.75351	0.000174374	0.00321045	Downregulated	protein_coding
ENSG00000160588.10	497.35	1.97495	0.613246	3.22048	0.00127976	0.0142247	Upregulated	protein_coding
ENSG00000160695.16	1079.49	6.06665	1.35913	4.46363	8.05808e-06	0.000327849	Upregulated	protein_coding
ENSG00000160716.6	47.6618	5.73196	1.47166	3.8949	9.82381e-05	0.00208036	Upregulated	protein_coding
ENSG00000160767.23	27.3073	8.09125	2.18453	3.70389	0.000212322	0.00376566	Upregulated	protein_coding
ENSG00000160813.7	170.581	-2.05541	0.76087	-2.70139	0.00690498	0.0456834	Downregulated	protein_coding
ENSG00000160932.11	147.079	4.97315	1.44032	3.45281	0.000554773	0.00782171	Upregulated	protein_coding
ENSG00000160948.14	922.801	4.33593	0.99093	4.37562	1.21087e-05	0.000444633	Upregulated	protein_coding
ENSG00000160957.15	505.717	-2.71528	0.990323	-2.74182	0.00611004	0.0421815	Downregulated	protein_coding
ENSG00000160972.10	149.473	-2.78635	1.03614	-2.68917	0.00716295	0.0466991	Downregulated	protein_coding
ENSG00000161010.16	333.34	6.02035	1.25988	4.77853	1.76582e-06	0.000101565	Upregulated	protein_coding
ENSG00000161011.20	2355.07	6.17252	1.19451	5.1674	2.37368e-07	2.21138e-05	Upregulated	protein_coding
ENSG00000161013.17	661.168	10.692	2.04247	5.23485	1.65115e-07	1.72749e-05	Upregulated	protein_coding
ENSG00000161021.13	540.215	8.09864	1.07558	7.52954	5.09179e-14	6.71225e-10	Upregulated	protein_coding
ENSG00000161040.19	296.65	2.78954	0.695589	4.01033	6.06337e-05	0.00145593	Upregulated	protein_coding
ENSG00000161048.12	489.981	3.87334	0.99267	3.90194	9.54251e-05	0.00204046	Upregulated	protein_coding
ENSG00000161202.20	890.486	-2.22977	0.823267	-2.70843	0.00676016	0.0451442	Downregulated	protein_coding
ENSG00000161267.12	155.856	4.53869	1.10981	4.08961	4.32108e-05	0.00112909	Upregulated	protein_coding
ENSG00000161551.15	496.741	1.47228	0.445889	3.30191	0.000960305	0.0116283	Upregulated	protein_coding
ENSG00000161664.7	21.6439	3.81508	1.33999	2.84709	0.00441207	0.0338545	Upregulated	protein_coding
ENSG00000161847.15	505.229	-2.39942	0.828681	-2.89547	0.00378593	0.0304298	Downregulated	protein_coding
ENSG00000161905.13	271.549	-3.35583	0.711082	-4.71933	2.36622e-06	0.000128629	Downregulated	protein_coding
ENSG00000161970.15	5471.85	2.73521	0.848882	3.22213	0.00127241	0.0141729	Upregulated	protein_coding
ENSG00000161996.19	483.146	-2.79476	0.850173	-3.28729	0.00101158	0.0120075	Downregulated	protein_coding
ENSG00000161999.13	251.134	-3.05925	1.00514	-3.04359	0.0023377	0.0217786	Downregulated	protein_coding
ENSG00000162032.16	341.087	-6.87655	1.56603	-4.39107	1.12796e-05	0.000419445	Downregulated	protein_coding
ENSG00000162065.14	270.387	-2.49084	0.785026	-3.17293	0.00150907	0.0159147	Downregulated	protein_coding
ENSG00000162073.14	142.317	-3.71642	0.969222	-3.83444	0.000125852	0.00252881	Downregulated	protein_coding
ENSG00000162078.12	16.4372	6.67767	2.247	2.97181	0.00296047	0.0258282	Upregulated	protein_coding
ENSG00000162144.10	784.888	-1.98878	0.630868	-3.15245	0.00161907	0.0167531	Downregulated	protein_coding
ENSG00000162267.14	15.1436	4.87146	1.5019	3.24353	0.00118059	0.0134979	Upregulated	protein_coding
ENSG00000162298.19	1360.9	-3.27974	0.753666	-4.35172	1.35073e-05	0.000480595	Downregulated	protein_coding
ENSG00000162398.12	25.1854	3.8347	1.33343	2.87582	0.00402983	0.0317438	Upregulated	protein_coding
ENSG00000162413.17	941.399	-1.40787	0.519967	-2.70762	0.00677674	0.0451442	Downregulated	protein_coding
ENSG00000162521.19	3214.75	-1.2973	0.44517	-2.91417	0.00356631	0.029246	Downregulated	protein_coding
ENSG00000162551.14	372.086	2.58164	0.709196	3.64024	0.000272388	0.00455679	Upregulated	protein_coding
ENSG00000162552.15	50.7555	9.3451	1.90468	4.90639	9.27681e-07	6.05403e-05	Upregulated	protein_coding
ENSG00000162594.17	37.0124	4.45801	1.21636	3.66503	0.000247306	0.00425047	Upregulated	protein_coding
ENSG00000162600.12	1470.5	1.74674	0.584561	2.98812	0.00280702	0.0249098	Upregulated	protein_coding
ENSG00000162630.6	153.227	6.40541	1.30786	4.89761	9.70101e-07	6.23822e-05	Upregulated	protein_coding
ENSG00000162643.13	8.36092	6.15696	2.28819	2.69075	0.00712915	0.04658	Upregulated	protein_coding
ENSG00000162645.13	2273.86	2.15378	0.62763	3.4316	0.000600028	0.00826528	Upregulated	protein_coding
ENSG00000162687.19	11.5441	6.9174	2.20247	3.14075	0.00168514	0.0172205	Upregulated	protein_coding
ENSG00000162714.13	236.574	10.8593	2.14808	5.05534	4.29619e-07	3.35116e-05	Upregulated	protein_coding
ENSG00000162747.13	1985.24	4.26531	1.16407	3.66415	0.000248165	0.00425415	Upregulated	protein_coding
ENSG00000162849.16	32.483	5.33655	1.27076	4.19951	2.67489e-05	0.000788671	Upregulated	protein_coding
ENSG00000162885.14	260.261	8.30166	1.79356	4.6286	3.68146e-06	0.000178422	Upregulated	protein_coding
ENSG00000162892.16	95.2032	7.33413	1.8006	4.07316	4.63799e-05	0.00119648	Upregulated	protein_coding
ENSG00000162931.12	28.6246	7.93225	2.15156	3.68675	0.000227136	0.00398673	Upregulated	protein_coding
ENSG00000163001.12	414.686	2.12568	0.568801	3.73712	0.000186137	0.0033775	Upregulated	protein_coding
ENSG00000163002.13	485.047	1.06909	0.402499	2.65612	0.00790448	0.0499764	Upregulated	protein_coding
ENSG00000163072.16	62.0889	3.96388	1.43048	2.77101	0.00558831	0.0397025	Upregulated	protein_coding
ENSG00000163082.10	73.6118	2.66309	0.760108	3.50357	0.000459068	0.00683032	Upregulated	protein_coding
ENSG00000163145.13	18.7788	7.29623	2.27326	3.20959	0.00132926	0.0146146	Upregulated	protein_coding
ENSG00000163220.11	33189.8	2.48273	0.908088	2.73402	0.00625666	0.0428348	Upregulated	protein_coding
ENSG00000163221.9	3406.79	3.19851	1.14578	2.79155	0.0052456	0.0379223	Upregulated	protein_coding
ENSG00000163380.16	20.0772	8.02229	2.44041	3.28727	0.00101163	0.0120075	Upregulated	protein_coding
ENSG00000163382.13	202.532	10.6777	2.10416	5.07457	3.88366e-07	3.11224e-05	Upregulated	protein_coding
ENSG00000163399.16	2474.94	-1.39182	0.489938	-2.84082	0.00449983	0.0343282	Downregulated	protein_coding
ENSG00000163464.8	314.435	2.22121	0.708013	3.13724	0.00170546	0.0173754	Upregulated	protein_coding
ENSG00000163472.19	67.4895	-2.08068	0.702971	-2.95984	0.00307804	0.0265291	Downregulated	protein_coding
ENSG00000163491.18	40.2557	1.79674	0.590558	3.04245	0.00234662	0.0218385	Upregulated	protein_coding
ENSG00000163519.14	753.052	2.46392	0.833082	2.95759	0.00310055	0.0266534	Upregulated	protein_coding
ENSG00000163568.16	146.905	2.32134	0.714717	3.24792	0.00116252	0.0133613	Upregulated	protein_coding
ENSG00000163596.17	388.853	2.57759	0.649642	3.96772	7.25644e-05	0.00167224	Upregulated	protein_coding
ENSG00000163600.13	388.363	1.94705	0.516272	3.77137	0.000162355	0.00304661	Upregulated	protein_coding
ENSG00000163602.12	1032.31	6.30979	1.17008	5.39262	6.94381e-08	9.77605e-06	Upregulated	protein_coding
ENSG00000163629.13	184.156	2.27393	0.617098	3.68487	0.000228817	0.00400582	Upregulated	protein_coding
ENSG00000163632.15	11.3395	6.8699	2.10937	3.25686	0.00112654	0.0130497	Upregulated	protein_coding
ENSG00000163634.12	2152.99	1.97079	0.737324	2.6729	0.00751986	0.0483247	Upregulated	protein_coding
ENSG00000163682.17	16590.7	2.53474	0.81992	3.09145	0.00199184	0.0195077	Upregulated	protein_coding
ENSG00000163807.6	663.679	5.13071	1.15693	4.43477	9.2169e-06	0.000362692	Upregulated	protein_coding
ENSG00000163808.17	2088.59	4.87864	1.12272	4.34537	1.39041e-05	0.000492717	Upregulated	protein_coding
ENSG00000163810.13	32.4488	8.45272	1.94994	4.33486	1.45856e-05	0.00051069	Upregulated	protein_coding
ENSG00000163833.8	28.0411	7.20242	2.21778	3.24758	0.0011639	0.013365	Upregulated	protein_coding
ENSG00000163879.11	20.1855	4.24907	1.24296	3.41851	0.000629653	0.00852197	Upregulated	protein_coding
ENSG00000163930.10	2438.89	-1.27742	0.46762	-2.73174	0.00630009	0.042995	Downregulated	protein_coding
ENSG00000163947.12	1456.52	1.67941	0.551315	3.04618	0.00231768	0.0216691	Upregulated	protein_coding
ENSG00000163993.7	342.804	2.68723	0.996284	2.69725	0.00699151	0.0460482	Upregulated	protein_coding
ENSG00000164010.15	4237.36	-2.07978	0.779233	-2.66901	0.00760741	0.0486855	Downregulated	protein_coding
ENSG00000164040.18	936.243	-1.55908	0.499977	-3.11831	0.0018189	0.0182687	Downregulated	protein_coding
ENSG00000164050.13	131.142	-2.53325	0.780342	-3.24633	0.00116901	0.0134121	Downregulated	protein_coding
ENSG00000164106.8	25.9137	8.26714	2.48747	3.32351	0.000888918	0.0109875	Upregulated	protein_coding
ENSG00000164161.10	26.5284	-5.57912	2.01638	-2.76689	0.00565932	0.03997	Downregulated	protein_coding
ENSG00000164176.13	237.666	3.7105	1.28268	2.89276	0.00381876	0.0305651	Upregulated	protein_coding
ENSG00000164182.12	206.672	2.13884	0.618729	3.45684	0.000546555	0.0077348	Upregulated	protein_coding
ENSG00000164220.7	71.6309	7.72981	2.02013	3.82639	0.000130039	0.00258948	Upregulated	protein_coding
ENSG00000164236.12	431.115	-2.38877	0.780077	-3.06223	0.00219697	0.0208877	Downregulated	protein_coding
ENSG00000164270.19	23.6699	5.89072	2.08615	2.82373	0.00474679	0.0356449	Upregulated	protein_coding
ENSG00000164306.11	536.703	1.68632	0.522635	3.22656	0.00125287	0.0140441	Upregulated	protein_coding
ENSG00000164346.10	1487.33	1.64424	0.59355	2.77018	0.00560253	0.0397485	Upregulated	protein_coding
ENSG00000164411.12	24.1757	7.89031	1.86542	4.22978	2.33918e-05	0.000723006	Upregulated	protein_coding
ENSG00000164440.15	40.9511	2.03814	0.643532	3.16712	0.00153956	0.0161329	Upregulated	protein_coding
ENSG00000164483.17	685.495	2.03208	0.717993	2.83022	0.00465162	0.0351706	Upregulated	protein_coding
ENSG00000164597.15	1393.84	5.64005	1.10895	5.08595	3.65784e-07	2.99477e-05	Upregulated	protein_coding
ENSG00000164626.9	109.072	-2.46515	0.892075	-2.76339	0.00572047	0.0402509	Downregulated	protein_coding
ENSG00000164707.16	82.9992	6.36927	1.86078	3.4229	0.000619578	0.0084482	Upregulated	protein_coding
ENSG00000164733.23	18808	2.0225	0.759824	2.66179	0.00777253	0.0494624	Upregulated	protein_coding
ENSG00000164742.16	29.8301	3.35784	1.24269	2.70206	0.00689109	0.0456262	Upregulated	protein_coding
ENSG00000164818.16	313.811	-1.96218	0.634513	-3.09242	0.00198531	0.0194728	Downregulated	protein_coding
ENSG00000164849.10	613.403	-4.87076	1.25546	-3.87967	0.0001046	0.00219045	Downregulated	protein_coding
ENSG00000164877.19	463.969	-2.73081	0.922279	-2.96094	0.00306702	0.0264861	Downregulated	protein_coding
ENSG00000164932.13	19.1014	4.20957	1.34633	3.1267	0.00176781	0.0178918	Upregulated	protein_coding
ENSG00000164938.14	2553.3	-1.35256	0.451422	-2.99622	0.00273353	0.0244117	Downregulated	protein_coding
ENSG00000165113.13	420.147	1.93774	0.592559	3.27012	0.00107503	0.012569	Upregulated	protein_coding
ENSG00000165181.17	159.783	8.20718	1.61543	5.0805	3.76439e-07	3.04442e-05	Upregulated	protein_coding
ENSG00000165272.16	569.642	-2.06271	0.759748	-2.71499	0.00662779	0.0445542	Downregulated	protein_coding
ENSG00000165322.18	1341.92	1.37936	0.407338	3.38629	0.000708451	0.00931466	Upregulated	protein_coding
ENSG00000165323.16	137.67	4.15766	1.07794	3.85705	0.000114765	0.00234921	Upregulated	protein_coding
ENSG00000165383.12	83.8532	9.32356	2.32341	4.01287	5.99845e-05	0.0014456	Upregulated	protein_coding
ENSG00000165406.16	68140	3.01395	0.873377	3.45091	0.000558692	0.00786015	Upregulated	protein_coding
ENSG00000165502.7	2777.53	2.89215	0.869149	3.32756	0.000876086	0.0108833	Upregulated	protein_coding
ENSG00000165525.18	3726.92	1.36259	0.478827	2.84569	0.00443155	0.0339349	Upregulated	protein_coding
ENSG00000165527.8	3023.96	-1.01443	0.348726	-2.90896	0.00362638	0.0295639	Downregulated	protein_coding
ENSG00000165682.15	172.033	3.01081	1.07763	2.79391	0.00520748	0.0377392	Upregulated	protein_coding
ENSG00000165702.15	1415.21	-3.06016	0.922554	-3.31705	0.000909731	0.0111766	Downregulated	protein_coding
ENSG00000165714.11	457.669	11.3688	2.04469	5.56017	2.69509e-08	5.14899e-06	Upregulated	protein_coding
ENSG00000165716.11	191.26	-3.24149	1.01473	-3.19444	0.00140102	0.0151447	Downregulated	protein_coding
ENSG00000165733.8	1089.27	1.18985	0.447533	2.65869	0.00784461	0.049741	Upregulated	protein_coding
ENSG00000165782.11	563.896	7.03086	1.35336	5.19512	2.04588e-07	2.00519e-05	Upregulated	protein_coding
ENSG00000165804.16	96.3944	-1.90009	0.698618	-2.71978	0.00653246	0.0440933	Downregulated	protein_coding
ENSG00000165923.17	50.8489	8.87246	1.89243	4.6884	2.75347e-06	0.000143186	Upregulated	protein_coding
ENSG00000165929.13	2603.31	5.41616	0.938098	5.77355	7.76199e-09	2.37959e-06	Upregulated	protein_coding
ENSG00000165943.5	1072.43	8.31046	1.58471	5.24413	1.57017e-07	1.66824e-05	Upregulated	protein_coding
ENSG00000165948.11	102.017	6.87827	1.57483	4.36763	1.25604e-05	0.000456764	Upregulated	protein_coding
ENSG00000165949.13	9137.12	9.1056	1.67338	5.44146	5.28459e-08	8.14785e-06	Upregulated	protein_coding
ENSG00000165972.13	18.3913	7.26976	2.02873	3.5834	0.000339149	0.0053963	Upregulated	protein_coding
ENSG00000165995.24	145.162	5.49896	1.19075	4.61807	3.87333e-06	0.000184	Upregulated	protein_coding
ENSG00000166171.13	1209.93	2.64957	0.877791	3.01845	0.00254072	0.0231399	Upregulated	protein_coding
ENSG00000166262.16	91.234	1.97355	0.66557	2.96521	0.00302477	0.0262329	Upregulated	protein_coding
ENSG00000166278.16	42.906	8.28289	1.99319	4.15559	3.24453e-05	0.000911962	Upregulated	protein_coding
ENSG00000166323.13	160.017	4.01634	0.911304	4.40725	1.04691e-05	0.000397719	Upregulated	protein_coding
ENSG00000166333.14	333.232	-5.23333	1.37456	-3.80729	0.000140501	0.00272977	Downregulated	protein_coding
ENSG00000166340.18	1581.48	-2.14766	0.700136	-3.06749	0.00215864	0.0205888	Downregulated	protein_coding
ENSG00000166359.11	32.996	7.6875	2.02643	3.79362	0.000148469	0.00283857	Upregulated	protein_coding
ENSG00000166405.16	278.544	1.91115	0.602996	3.16943	0.00152741	0.0160311	Upregulated	protein_coding
ENSG00000166441.13	12895.3	1.95877	0.648412	3.02087	0.0025205	0.023066	Upregulated	protein_coding
ENSG00000166451.14	337.169	7.29193	1.64647	4.42882	9.47515e-06	0.000371061	Upregulated	protein_coding
ENSG00000166454.10	1256.8	13.3507	2.54612	5.24355	1.57513e-07	1.66824e-05	Upregulated	protein_coding
ENSG00000166477.13	379.673	1.79066	0.616048	2.90668	0.00365284	0.0297153	Upregulated	protein_coding
ENSG00000166483.12	904.528	-1.91216	0.674352	-2.83554	0.00457476	0.0347389	Downregulated	protein_coding
ENSG00000166546.15	50.4303	7.01275	1.99483	3.51546	0.000438998	0.00659122	Upregulated	protein_coding
ENSG00000166562.9	446.876	1.5889	0.484272	3.281	0.0010344	0.0122131	Upregulated	protein_coding
ENSG00000166669.14	2948.37	2.13758	0.736824	2.90107	0.00371893	0.0300858	Upregulated	protein_coding
ENSG00000166676.17	50.4193	3.89117	1.31442	2.96038	0.0030726	0.0265084	Upregulated	protein_coding
ENSG00000166710.23	62567.2	4.45881	1.05968	4.2077	2.57978e-05	0.000773786	Upregulated	protein_coding
ENSG00000166780.11	75.1032	8.88664	1.98986	4.46597	7.97056e-06	0.000327133	Upregulated	protein_coding
ENSG00000166783.22	6090.45	7.13007	1.27913	5.57417	2.48719e-08	4.93043e-06	Upregulated	protein_coding
ENSG00000166793.13	1679.43	-3.15695	0.749145	-4.21407	2.50807e-05	0.000760561	Downregulated	protein_coding
ENSG00000166819.12	24.5902	2.78452	0.923165	3.01628	0.00255899	0.0232488	Upregulated	protein_coding
ENSG00000166831.9	20.5369	-5.03933	1.58614	-3.17711	0.00148752	0.0157188	Downregulated	protein_coding
ENSG00000166851.15	414.622	-4.08404	1.00647	-4.0578	4.95362e-05	0.00124739	Downregulated	protein_coding
ENSG00000166896.9	257.811	4.58383	1.41545	3.23842	0.00120193	0.0136651	Upregulated	protein_coding
ENSG00000166912.17	1803.3	2.971	0.705109	4.21353	2.51408e-05	0.000760561	Upregulated	protein_coding
ENSG00000166925.9	1471.54	-2.49087	0.907297	-2.74538	0.00604412	0.0418469	Downregulated	protein_coding
ENSG00000166965.13	423.369	-2.27757	0.824888	-2.76106	0.00576135	0.040463	Downregulated	protein_coding
ENSG00000166971.17	789.912	2.37822	0.656429	3.62297	0.000291235	0.00479302	Upregulated	protein_coding
ENSG00000166987.15	764.086	-3.23216	0.965145	-3.34888	0.000811379	0.0102649	Downregulated	protein_coding
ENSG00000167094.16	172.609	2.57623	0.937214	2.74882	0.00598111	0.0415416	Upregulated	protein_coding
ENSG00000167118.11	359.404	-2.15763	0.777471	-2.77519	0.00551687	0.0393859	Downregulated	protein_coding
ENSG00000167136.7	51.0056	-3.47386	1.24506	-2.79012	0.00526888	0.0380378	Downregulated	protein_coding
ENSG00000167182.16	484.217	-3.35226	1.18652	-2.82529	0.00472375	0.0355427	Downregulated	protein_coding
ENSG00000167193.8	700.623	2.81355	0.708687	3.97009	7.18462e-05	0.00166045	Upregulated	protein_coding
ENSG00000167216.19	143.639	1.99552	0.726586	2.74643	0.00602471	0.0417784	Upregulated	protein_coding
ENSG00000167286.11	983.773	2.90244	0.775503	3.74266	0.000182083	0.00331993	Upregulated	protein_coding
ENSG00000167306.21	92.1729	2.76659	0.871382	3.17494	0.00149865	0.0158238	Upregulated	protein_coding
ENSG00000167378.10	636.688	-1.30561	0.450759	-2.89646	0.003774	0.0303636	Downregulated	protein_coding
ENSG00000167461.12	887.983	-1.95684	0.59017	-3.31572	0.000914069	0.011209	Downregulated	protein_coding
ENSG00000167513.9	635.977	-3.32569	1.06462	-3.12382	0.00178517	0.018026	Downregulated	protein_coding
ENSG00000167536.14	781.888	-2.74813	0.849494	-3.23503	0.00121631	0.0137823	Downregulated	protein_coding
ENSG00000167553.17	1137.62	-2.71624	0.847286	-3.20582	0.0013468	0.0147327	Downregulated	protein_coding
ENSG00000167565.13	221.337	-1.7731	0.659318	-2.68929	0.00716046	0.0466944	Downregulated	protein_coding
ENSG00000167604.15	653.541	-1.94765	0.727201	-2.67828	0.00740004	0.047716	Downregulated	protein_coding
ENSG00000167608.12	21.6417	7.2572	2.20487	3.29145	0.000996736	0.0118855	Upregulated	protein_coding
ENSG00000167613.16	929.444	3.59649	1.17051	3.07257	0.00212222	0.0203549	Upregulated	protein_coding
ENSG00000167614.14	15.2161	7.37939	2.45417	3.00688	0.00263944	0.0237505	Upregulated	protein_coding
ENSG00000167625.12	233.619	-2.39012	0.69895	-3.41959	0.000627163	0.00850423	Downregulated	protein_coding
ENSG00000167633.18	18.8612	7.32151	2.54568	2.87605	0.00402684	0.0317297	Upregulated	protein_coding
ENSG00000167634.12	14.6769	6.5409	2.30037	2.84341	0.00446339	0.0340896	Upregulated	protein_coding
ENSG00000167670.16	792.18	-1.81329	0.658698	-2.75283	0.00590823	0.0412079	Downregulated	protein_coding
ENSG00000167680.17	73.4169	-2.86592	0.988882	-2.89814	0.00375382	0.0302659	Downregulated	protein_coding
ENSG00000167703.15	559.609	4.38143	1.06919	4.09791	4.16902e-05	0.00110136	Upregulated	protein_coding
ENSG00000167705.12	1527.2	13.7627	2.63119	5.23059	1.68969e-07	1.74688e-05	Upregulated	protein_coding
ENSG00000167775.11	114.41	-2.02835	0.678396	-2.98992	0.0027905	0.024805	Downregulated	protein_coding
ENSG00000167785.9	330.688	11.4197	2.07653	5.49942	3.81036e-08	6.39873e-06	Upregulated	protein_coding
ENSG00000167797.8	186.149	-2.16891	0.791232	-2.74119	0.00612177	0.0422403	Downregulated	protein_coding
ENSG00000167850.4	63.3683	9.28744	2.06803	4.49096	7.0903e-06	0.000295785	Upregulated	protein_coding
ENSG00000167851.15	533.657	12.0692	2.21011	5.46088	4.73773e-08	7.43514e-06	Upregulated	protein_coding
ENSG00000167962.15	224.255	10.7166	2.13511	5.01921	5.18842e-07	3.84249e-05	Upregulated	protein_coding
ENSG00000167964.13	24.2238	4.45553	1.28285	3.47316	0.000514373	0.0073985	Upregulated	protein_coding
ENSG00000167987.11	210.075	-2.03374	0.72784	-2.79421	0.00520265	0.0377146	Downregulated	protein_coding
ENSG00000167996.16	9906.04	-4.38393	1.03146	-4.25022	2.13561e-05	0.000675936	Downregulated	protein_coding
ENSG00000168032.10	14.6443	4.89909	1.80858	2.7088	0.00675273	0.0451294	Upregulated	protein_coding
ENSG00000168038.11	690.108	1.2221	0.383839	3.1839	0.00145307	0.0155165	Upregulated	protein_coding
ENSG00000168140.5	125.35	9.4034	2.18319	4.30718	1.65347e-05	0.000553923	Upregulated	protein_coding
ENSG00000168159.15	1070.75	5.56428	1.36718	4.06991	4.70315e-05	0.00120856	Upregulated	protein_coding
ENSG00000168175.16	1669.36	-1.514	0.513906	-2.94607	0.00321839	0.0273454	Downregulated	protein_coding
ENSG00000168264.11	3930.59	-1.36254	0.508326	-2.68043	0.00735267	0.047548	Downregulated	protein_coding
ENSG00000168268.11	155.568	-3.37171	0.854207	-3.94718	7.90758e-05	0.00178343	Downregulated	protein_coding
ENSG00000168280.18	159.575	4.7447	0.946155	5.01472	5.31113e-07	3.92235e-05	Upregulated	protein_coding
ENSG00000168282.6	134.289	-6.13874	1.46318	-4.19548	2.723e-05	0.000798574	Downregulated	protein_coding
ENSG00000168300.14	15106.8	1.98059	0.69577	2.84661	0.00441868	0.0338757	Upregulated	protein_coding
ENSG00000168350.8	62.3744	3.60659	1.22713	2.93904	0.00329227	0.0277053	Upregulated	protein_coding
ENSG00000168386.19	253.799	4.64672	1.22201	3.80254	0.000143223	0.00276028	Upregulated	protein_coding
ENSG00000168394.13	1138.08	9.86715	1.81412	5.43908	5.35556e-08	8.20927e-06	Upregulated	protein_coding
ENSG00000168397.17	1011.9	-1.24291	0.457203	-2.71851	0.00655774	0.0442186	Downregulated	protein_coding
ENSG00000168476.12	388.583	-3.42665	0.94762	-3.61606	0.000299118	0.00489829	Downregulated	protein_coding
ENSG00000168488.19	2505.78	-2.61646	0.846496	-3.09092	0.00199535	0.0195307	Downregulated	protein_coding
ENSG00000168542.17	88.1493	8.97632	2.19424	4.09085	4.29786e-05	0.00112637	Upregulated	protein_coding
ENSG00000168653.11	814.536	2.56603	0.879626	2.91718	0.00353213	0.0290742	Upregulated	protein_coding
ENSG00000168679.18	97.6941	2.94721	0.941779	3.12941	0.00175157	0.0177616	Upregulated	protein_coding
ENSG00000168685.15	9153.11	2.50494	0.839507	2.98382	0.0028467	0.0251519	Upregulated	protein_coding
ENSG00000168702.18	41.3834	3.55727	0.876776	4.05721	4.96615e-05	0.00124913	Upregulated	protein_coding
ENSG00000168754.15	120.329	-5.02899	1.30028	-3.86762	0.000109904	0.0022699	Downregulated	protein_coding
ENSG00000168824.15	66.4116	3.30537	0.740212	4.46545	7.99025e-06	0.000327133	Upregulated	protein_coding
ENSG00000168918.14	3812.32	11.7753	1.90627	6.17715	6.52671e-10	5.55086e-07	Upregulated	protein_coding
ENSG00000168924.15	1010.35	-1.41312	0.487666	-2.89772	0.00375884	0.030276	Downregulated	protein_coding
ENSG00000168961.17	623.596	-3.41123	0.830653	-4.10669	4.01374e-05	0.00106999	Downregulated	protein_coding
ENSG00000169031.21	83.6544	2.54996	0.806701	3.16097	0.00157245	0.0163994	Upregulated	protein_coding
ENSG00000169045.19	13741	3.63727	0.897598	4.05223	5.07327e-05	0.00127024	Upregulated	protein_coding
ENSG00000169084.15	5.50202	5.85218	2.11442	2.76775	0.00564445	0.0399184	Upregulated	protein_coding
ENSG00000169136.13	189.09	-4.30344	1.13111	-3.8046	0.000142032	0.00274738	Downregulated	protein_coding
ENSG00000169188.5	279.345	-2.16277	0.674018	-3.20877	0.00133306	0.0146504	Downregulated	protein_coding
ENSG00000169230.10	425.308	-1.43036	0.427301	-3.34743	0.000815654	0.0103053	Downregulated	protein_coding
ENSG00000169249.14	378.47	1.64499	0.493024	3.33653	0.000848302	0.0105897	Upregulated	protein_coding
ENSG00000169282.18	110.66	3.81469	1.09787	3.47465	0.000511528	0.00736159	Upregulated	protein_coding
ENSG00000169564.7	2921.87	-4.62286	1.30535	-3.54147	0.000397901	0.00612505	Downregulated	protein_coding
ENSG00000169621.11	1552.05	2.21018	0.723882	3.05323	0.0022639	0.0213552	Upregulated	protein_coding
ENSG00000169758.13	29.1185	5.39133	1.66596	3.23618	0.00121143	0.0137492	Upregulated	protein_coding
ENSG00000169918.10	43.7331	4.76358	1.54701	3.07921	0.00207552	0.0200369	Upregulated	protein_coding
ENSG00000169925.17	816.36	-2.69014	0.818219	-3.2878	0.00100973	0.0119973	Downregulated	protein_coding
ENSG00000169926.11	4089.41	3.15041	0.913806	3.44757	0.000565663	0.0079286	Upregulated	protein_coding
ENSG00000169964.8	96.2586	9.66626	1.9754	4.8933	9.91566e-07	6.36074e-05	Upregulated	protein_coding
ENSG00000169981.11	98.3109	6.579	1.78249	3.6909	0.000223465	0.00393302	Upregulated	protein_coding
ENSG00000169992.10	12.4997	7.04192	2.51927	2.79522	0.0051864	0.0376382	Upregulated	protein_coding
ENSG00000170011.14	41.6475	3.96076	1.06542	3.71755	0.000201167	0.00360801	Upregulated	protein_coding
ENSG00000170037.14	497.906	-1.74936	0.52362	-3.3409	0.000835079	0.0105042	Downregulated	protein_coding
ENSG00000170043.12	336.453	-1.92702	0.603045	-3.19549	0.00139593	0.0151021	Downregulated	protein_coding
ENSG00000170074.21	215.328	2.32919	0.860203	2.70772	0.00677466	0.0451442	Upregulated	protein_coding
ENSG00000170092.15	20.5816	5.87194	2.07554	2.82911	0.00466771	0.0352549	Upregulated	protein_coding
ENSG00000170113.16	249.985	3.22499	0.923133	3.49353	0.00047668	0.00701712	Upregulated	protein_coding
ENSG00000170144.22	3726.06	-2.12039	0.724418	-2.92703	0.00342221	0.028391	Downregulated	protein_coding
ENSG00000170175.11	108.193	9.8607	2.07434	4.75367	1.99761e-06	0.000112536	Upregulated	protein_coding
ENSG00000170236.16	126.864	3.56731	0.971892	3.67048	0.000242098	0.00418827	Upregulated	protein_coding
ENSG00000170270.5	107.02	6.41581	1.57119	4.08341	4.43794e-05	0.00115391	Upregulated	protein_coding
ENSG00000170291.16	156.034	6.50434	1.45301	4.47646	7.58894e-06	0.000313118	Upregulated	protein_coding
ENSG00000170296.10	536.111	-3.36844	0.810541	-4.15579	3.24159e-05	0.000911962	Downregulated	protein_coding
ENSG00000170310.15	468.316	1.33737	0.457116	2.92567	0.00343719	0.0284794	Upregulated	protein_coding
ENSG00000170365.10	339.117	-3.21314	0.927648	-3.46374	0.000532716	0.00757238	Downregulated	protein_coding
ENSG00000170379.21	74.9363	3.92991	1.45095	2.70851	0.00675869	0.0451442	Upregulated	protein_coding
ENSG00000170381.15	7.2319	6.69816	2.39535	2.79632	0.00516878	0.0375413	Upregulated	protein_coding
ENSG00000170382.12	245.908	-2.08271	0.650534	-3.20153	0.00136699	0.0148929	Downregulated	protein_coding
ENSG00000170464.10	78.3085	5.99708	1.45662	4.11711	3.83648e-05	0.00103849	Upregulated	protein_coding
ENSG00000170476.16	544.385	-2.37041	0.791438	-2.99507	0.00274386	0.0244811	Downregulated	protein_coding
ENSG00000170779.11	623.58	-2.42272	0.813694	-2.97743	0.00290676	0.0255031	Downregulated	protein_coding
ENSG00000170807.12	19.8588	6.5387	2.44796	2.67109	0.00756062	0.0485189	Upregulated	protein_coding
ENSG00000170881.5	1423.2	8.90963	1.64136	5.42821	5.69223e-08	8.47885e-06	Upregulated	protein_coding
ENSG00000170889.14	5854.37	12.2104	1.78643	6.83507	8.19662e-12	2.16104e-08	Upregulated	protein_coding
ENSG00000170892.13	290.51	11.0367	2.08439	5.29493	1.19059e-07	1.39473e-05	Upregulated	protein_coding
ENSG00000170906.16	402.235	9.98857	2.02734	4.92694	8.35263e-07	5.56104e-05	Upregulated	protein_coding
ENSG00000170909.14	201.888	3.36051	0.977186	3.43896	0.000583949	0.00810306	Upregulated	protein_coding
ENSG00000171067.11	174.908	-1.18532	0.396829	-2.98697	0.00281759	0.0249868	Downregulated	protein_coding
ENSG00000171094.18	27.7902	8.45662	2.07723	4.07111	4.67891e-05	0.00120351	Upregulated	protein_coding
ENSG00000171155.8	179.331	10.6621	2.11066	5.05156	4.38225e-07	3.40162e-05	Upregulated	protein_coding
ENSG00000171161.13	760.175	-1.67729	0.478448	-3.50568	0.000455437	0.00678779	Downregulated	protein_coding
ENSG00000171189.18	79.1067	9.42379	2.02145	4.6619	3.13299e-06	0.000156122	Upregulated	protein_coding
ENSG00000171217.5	32.96	6.61682	1.84983	3.57698	0.000347586	0.00548749	Upregulated	protein_coding
ENSG00000171298.14	453.803	10.7881	2.09797	5.14219	2.71561e-07	2.41068e-05	Upregulated	protein_coding
ENSG00000171443.7	135.895	-1.69728	0.579907	-2.92681	0.0034246	0.0284018	Downregulated	protein_coding
ENSG00000171444.19	215.191	2.36968	0.475153	4.98719	6.1265e-07	4.36554e-05	Upregulated	protein_coding
ENSG00000171451.15	68.7974	9.96693	2.13798	4.66184	3.13398e-06	0.000156122	Upregulated	protein_coding
ENSG00000171462.15	18.969	3.98682	1.39927	2.84922	0.00438271	0.0337155	Upregulated	protein_coding
ENSG00000171657.6	93.159	4.07974	1.2122	3.36556	0.000763872	0.00983346	Upregulated	protein_coding
ENSG00000171747.9	7.85221	6.5647	2.10708	3.11555	0.00183604	0.0183638	Upregulated	protein_coding
ENSG00000171791.14	2881.87	1.47973	0.538076	2.75005	0.0059587	0.0414515	Upregulated	protein_coding
ENSG00000171819.5	30.1279	7.9815	2.01669	3.95773	7.56667e-05	0.00172873	Upregulated	protein_coding
ENSG00000171843.17	1938.56	1.45692	0.454657	3.20444	0.00135325	0.0147798	Upregulated	protein_coding
ENSG00000171862.15	7443.63	8.96651	1.46218	6.13229	8.66234e-10	6.34396e-07	Upregulated	protein_coding
ENSG00000171877.21	91.4223	7.99382	1.97379	4.05	5.12187e-05	0.00127877	Upregulated	protein_coding
ENSG00000171916.17	16.9779	7.20133	2.133	3.37615	0.000735076	0.00957051	Upregulated	protein_coding
ENSG00000171960.12	384.634	-1.04915	0.354974	-2.95557	0.00312096	0.0267765	Downregulated	protein_coding
ENSG00000172062.17	52.7725	2.78014	0.996745	2.78922	0.00528354	0.0381228	Upregulated	protein_coding
ENSG00000172116.23	998.09	3.07982	0.655361	4.69943	2.60893e-06	0.000137391	Upregulated	protein_coding
ENSG00000172164.15	968.705	-1.19071	0.410154	-2.90308	0.00369507	0.0299571	Downregulated	protein_coding
ENSG00000172209.6	121.905	9.93706	2.05707	4.83069	1.36062e-06	8.26564e-05	Upregulated	protein_coding
ENSG00000172215.6	246.196	3.56617	0.715701	4.98277	6.26803e-07	4.41862e-05	Upregulated	protein_coding
ENSG00000172232.10	467.184	11.32	2.82421	4.00819	6.11868e-05	0.00146654	Upregulated	protein_coding
ENSG00000172269.20	162.468	-1.9345	0.704592	-2.74557	0.00604063	0.0418448	Downregulated	protein_coding
ENSG00000172340.15	1196.27	1.50218	0.507839	2.95799	0.00309657	0.0266357	Upregulated	protein_coding
ENSG00000172345.14	224.227	-2.29515	0.848271	-2.70568	0.00681647	0.0452914	Downregulated	protein_coding
ENSG00000172432.19	2020.65	-2.56446	0.648854	-3.95229	7.74065e-05	0.00175667	Downregulated	protein_coding
ENSG00000172456.18	339.533	1.79838	0.521382	3.44925	0.00056214	0.00789182	Upregulated	protein_coding
ENSG00000172534.14	4313.41	-2.8951	0.936484	-3.09146	0.00199175	0.0195077	Downregulated	protein_coding
ENSG00000172640.4	10.3139	6.08184	2.28713	2.65916	0.00783348	0.0497183	Upregulated	protein_coding
ENSG00000172673.12	967.041	12.0397	2.06984	5.81677	5.99971e-09	1.97728e-06	Upregulated	protein_coding
ENSG00000172757.13	3495.43	-2.06233	0.645428	-3.19529	0.00139688	0.0151062	Downregulated	protein_coding
ENSG00000172803.18	132.077	3.49913	1.00696	3.47494	0.000510967	0.00735753	Upregulated	protein_coding
ENSG00000172809.13	8223.46	2.5718	0.783541	3.28228	0.00102971	0.0121742	Upregulated	protein_coding
ENSG00000172878.14	78.0279	8.07305	1.95181	4.13618	3.53137e-05	0.00097085	Upregulated	protein_coding
ENSG00000172977.13	537.276	-1.7049	0.596317	-2.85904	0.00424923	0.0329836	Downregulated	protein_coding
ENSG00000173080.6	68.0498	5.93369	1.48991	3.98257	6.81727e-05	0.00159459	Upregulated	protein_coding
ENSG00000173124.15	13.4217	7.29758	2.09605	3.48158	0.000498463	0.00723279	Upregulated	protein_coding
ENSG00000173137.12	96.6201	9.51788	2.03696	4.67258	2.97433e-06	0.000151386	Upregulated	protein_coding
ENSG00000173208.4	480.764	3.25644	0.77458	4.20413	2.62083e-05	0.000780769	Upregulated	protein_coding
ENSG00000173250.3	10.7933	6.94298	2.3043	3.01305	0.00258639	0.023417	Upregulated	protein_coding
ENSG00000173258.13	313.347	2.14244	0.73562	2.91242	0.00358637	0.0293739	Upregulated	protein_coding
ENSG00000173272.16	758.538	1.51119	0.501251	3.01484	0.00257119	0.0233191	Upregulated	protein_coding
ENSG00000173273.17	1297.44	4.08053	0.977379	4.17497	2.98024e-05	0.000854064	Upregulated	protein_coding
ENSG00000173281.5	313.228	5.13591	0.995757	5.15779	2.49881e-07	2.27962e-05	Upregulated	protein_coding
ENSG00000173349.6	41.2947	-24.145	4.7853	-5.04567	4.51944e-07	3.48407e-05	Downregulated	protein_coding
ENSG00000173402.13	311.753	-2.25314	0.788085	-2.859	0.00424978	0.0329836	Downregulated	protein_coding
ENSG00000173421.17	16.3269	4.9754	1.32104	3.76627	0.000165706	0.00309447	Upregulated	protein_coding
ENSG00000173442.13	5722.33	-1.37498	0.510472	-2.69355	0.00706947	0.0463879	Downregulated	protein_coding
ENSG00000173456.5	492.34	-3.64591	1.07363	-3.39588	0.000684084	0.00907238	Downregulated	protein_coding
ENSG00000173530.6	190.777	2.08751	0.752392	2.77449	0.00552881	0.0394391	Upregulated	protein_coding
ENSG00000173585.18	104.891	2.34102	0.753199	3.10811	0.0018829	0.0186837	Upregulated	protein_coding
ENSG00000173621.9	98.9584	-3.60958	1.00968	-3.57496	0.000350285	0.00551688	Downregulated	protein_coding
ENSG00000173638.19	248.414	5.0055	1.11338	4.49575	6.9324e-06	0.000292905	Upregulated	protein_coding
ENSG00000173660.12	2959.16	2.17101	0.713178	3.04413	0.00233353	0.0217571	Upregulated	protein_coding
ENSG00000173662.21	12.3389	7.14273	1.96839	3.62871	0.000284837	0.00470534	Upregulated	protein_coding
ENSG00000173698.18	19.2705	7.75137	2.04148	3.79694	0.000146495	0.00280694	Upregulated	protein_coding
ENSG00000173728.11	7.84504	6.501	2.38334	2.72769	0.00637803	0.0433237	Upregulated	protein_coding
ENSG00000173801.17	297.716	-2.83487	0.762895	-3.71593	0.000202456	0.00362865	Downregulated	protein_coding
ENSG00000173898.15	212.696	-2.19676	0.789059	-2.78403	0.00536884	0.0385588	Downregulated	protein_coding
ENSG00000174038.13	37.323	7.97481	2.0462	3.89738	9.7238e-05	0.00206582	Upregulated	protein_coding
ENSG00000174059.17	82.0449	-4.10339	1.16389	-3.52559	0.000422543	0.00642841	Downregulated	protein_coding
ENSG00000174197.19	4947.43	1.00745	0.375084	2.68593	0.00723288	0.0470229	Upregulated	protein_coding
ENSG00000174225.15	19.0616	7.8417	2.15025	3.64687	0.000265454	0.00447596	Upregulated	protein_coding
ENSG00000174231.18	4902.51	12.8314	1.92575	6.66309	2.68121e-11	5.12651e-08	Upregulated	protein_coding
ENSG00000174282.12	564.847	12.1313	2.20975	5.48991	4.02136e-08	6.61706e-06	Upregulated	protein_coding
ENSG00000174292.13	44.3034	8.6995	2.26281	3.84455	0.000120774	0.00244562	Upregulated	protein_coding
ENSG00000174373.17	2390.2	1.21771	0.420162	2.8982	0.00375307	0.0302659	Upregulated	protein_coding
ENSG00000174482.11	64.7323	3.21418	1.0198	3.15177	0.00162284	0.0167723	Upregulated	protein_coding
ENSG00000174500.13	197.958	10.9472	2.17936	5.02313	5.08352e-07	3.78608e-05	Upregulated	protein_coding
ENSG00000174501.15	2690.02	1.22832	0.403529	3.04394	0.00233505	0.0217616	Upregulated	protein_coding
ENSG00000174514.13	70.0875	3.02998	0.831853	3.64244	0.000270065	0.00452944	Upregulated	protein_coding
ENSG00000174527.11	14.275	6.58454	2.20745	2.98287	0.00285561	0.0251716	Upregulated	protein_coding
ENSG00000174611.12	90.1688	4.39907	1.17477	3.74462	0.000180666	0.00330148	Upregulated	protein_coding
ENSG00000174672.16	29.2922	7.99191	2.09907	3.80735	0.000140463	0.00272977	Upregulated	protein_coding
ENSG00000174775.18	52.5586	4.69516	1.44974	3.23862	0.0012011	0.0136651	Upregulated	protein_coding
ENSG00000174903.16	974.668	-2.95149	0.910962	-3.23997	0.00119541	0.0136143	Downregulated	protein_coding
ENSG00000174946.7	267.851	2.99005	1.02115	2.92813	0.00341007	0.0283259	Upregulated	protein_coding
ENSG00000174951.12	152.845	-4.37038	1.0951	-3.99084	6.58389e-05	0.00155541	Downregulated	protein_coding
ENSG00000174953.14	1972.6	1.1283	0.405756	2.78073	0.00542369	0.0388902	Upregulated	protein_coding
ENSG00000175048.17	332.983	-2.09601	0.707279	-2.96349	0.00304176	0.0263213	Downregulated	protein_coding
ENSG00000175130.7	340.405	-3.01859	1.02373	-2.94861	0.00319209	0.0271482	Downregulated	protein_coding
ENSG00000175224.17	1928.09	-1.84387	0.559401	-3.29616	0.000980172	0.0117732	Downregulated	protein_coding
ENSG00000175265.19	684.053	3.85306	0.900022	4.28108	1.8599e-05	0.000604639	Upregulated	protein_coding
ENSG00000175334.8	151.278	-3.76131	0.745115	-5.04797	4.46539e-07	3.4525e-05	Downregulated	protein_coding
ENSG00000175426.11	13.2634	6.89358	1.9951	3.45525	0.000549777	0.00777204	Upregulated	protein_coding
ENSG00000175573.7	179.683	-2.93913	0.905527	-3.24577	0.00117132	0.0134328	Downregulated	protein_coding
ENSG00000175582.20	12601.3	1.63693	0.583812	2.80386	0.00504946	0.0369187	Upregulated	protein_coding
ENSG00000175591.12	211.486	-2.30596	0.756408	-3.04857	0.00229934	0.0215737	Downregulated	protein_coding
ENSG00000175806.15	211.425	5.86584	1.17903	4.97515	6.51955e-07	4.57148e-05	Upregulated	protein_coding
ENSG00000175970.11	488.084	-1.8193	0.658119	-2.76439	0.00570294	0.0401704	Downregulated	protein_coding
ENSG00000176092.17	45.7253	2.44509	0.642928	3.80306	0.000142918	0.00275866	Upregulated	protein_coding
ENSG00000176153.13	64.1682	6.95312	1.58146	4.39663	1.09942e-05	0.000411737	Upregulated	protein_coding
ENSG00000176171.12	263.309	1.39402	0.503161	2.77053	0.00559659	0.0397185	Upregulated	protein_coding
ENSG00000176358.16	27.7716	8.02505	2.03343	3.94656	7.92824e-05	0.00178657	Upregulated	protein_coding
ENSG00000176371.14	119.919	7.09178	1.50561	4.71023	2.47437e-06	0.000132865	Upregulated	protein_coding
ENSG00000176383.9	49.2282	3.67394	1.0787	3.4059	0.000659454	0.00883012	Upregulated	protein_coding
ENSG00000176387.7	17.3408	7.33267	2.10085	3.49033	0.00048242	0.00707948	Upregulated	protein_coding
ENSG00000176444.19	559.376	12.1797	2.11301	5.76413	8.20824e-09	2.44503e-06	Upregulated	protein_coding
ENSG00000176454.15	99.2182	5.19901	1.19733	4.34216	1.41089e-05	0.000497635	Upregulated	protein_coding
ENSG00000176510.5	7.80054	6.66355	2.36783	2.8142	0.00488985	0.0361401	Upregulated	protein_coding
ENSG00000176563.10	29.3974	7.8409	2.26194	3.46645	0.000527389	0.00752288	Upregulated	protein_coding
ENSG00000176595.4	560.012	11.893	2.5908	4.59046	4.42275e-06	0.000204572	Upregulated	protein_coding
ENSG00000176601.14	9.06814	6.60668	2.31781	2.8504	0.00436639	0.0336707	Upregulated	protein_coding
ENSG00000176619.13	968.603	-2.22319	0.735652	-3.02207	0.0025105	0.0229965	Downregulated	protein_coding
ENSG00000176641.11	448.048	-3.82196	1.24476	-3.07044	0.00213744	0.0204609	Downregulated	protein_coding
ENSG00000176681.15	73.6556	2.04225	0.735189	2.77785	0.00547198	0.0391928	Upregulated	protein_coding
ENSG00000176783.15	1131.92	6.45625	1.14614	5.63303	1.77069e-08	3.79547e-06	Upregulated	protein_coding
ENSG00000176845.13	1014.98	3.18795	1.01454	3.14227	0.00167645	0.0171515	Upregulated	protein_coding
ENSG00000176928.7	380.707	2.25787	0.799127	2.82542	0.00472188	0.0355427	Upregulated	protein_coding
ENSG00000176945.18	10.396	6.76775	2.33858	2.89396	0.00380418	0.0305037	Upregulated	protein_coding
ENSG00000176974.21	187.539	4.04663	1.20567	3.35634	0.000789812	0.0100742	Upregulated	protein_coding
ENSG00000176986.16	1589.73	-2.20518	0.780457	-2.8255	0.00472063	0.0355427	Downregulated	protein_coding
ENSG00000176994.11	1101.62	7.91432	1.32278	5.98308	2.18952e-09	1.14202e-06	Upregulated	protein_coding
ENSG00000177082.13	162.141	6.31637	1.35993	4.64462	3.40705e-06	0.000167276	Upregulated	protein_coding
ENSG00000177169.10	2727.15	-3.48382	0.956793	-3.64115	0.000271427	0.0045436	Downregulated	protein_coding
ENSG00000177225.17	467.661	-2.00903	0.698846	-2.87478	0.00404306	0.0318195	Downregulated	protein_coding
ENSG00000177302.15	662.223	4.93567	1.1682	4.22503	2.38913e-05	0.000732434	Upregulated	protein_coding
ENSG00000177311.12	1230.7	1.81917	0.64823	2.80636	0.00501046	0.0367145	Upregulated	protein_coding
ENSG00000177370.5	199.087	10.4788	2.10811	4.97073	6.67008e-07	4.62781e-05	Upregulated	protein_coding
ENSG00000177427.13	87.4781	9.24051	1.98067	4.66535	3.08099e-06	0.000155316	Upregulated	protein_coding
ENSG00000177494.6	43.4752	6.15623	1.85391	3.32068	0.000897994	0.0110634	Upregulated	protein_coding
ENSG00000177535.10	20.3683	7.72095	2.30077	3.35582	0.000791306	0.0100835	Upregulated	protein_coding
ENSG00000177628.16	143.804	5.68702	1.49203	3.8116	0.000138069	0.00269878	Upregulated	protein_coding
ENSG00000177669.4	23.2958	7.83117	2.1137	3.70496	0.000211422	0.00376123	Upregulated	protein_coding
ENSG00000177692.13	20.3504	7.48773	1.94344	3.85282	0.000116764	0.00238089	Upregulated	protein_coding
ENSG00000177697.19	337.123	-1.86214	0.574004	-3.24412	0.00117816	0.013487	Downregulated	protein_coding
ENSG00000177706.9	68.3034	9.23959	2.10179	4.39606	1.10233e-05	0.000412242	Upregulated	protein_coding
ENSG00000177731.16	1869.61	5.04902	1.40136	3.60293	0.000314647	0.00508624	Upregulated	protein_coding
ENSG00000177733.7	1421.95	-1.68683	0.55938	-3.01553	0.00256529	0.0232739	Downregulated	protein_coding
ENSG00000177954.14	23008.6	3.48696	0.877153	3.97531	7.02871e-05	0.00162997	Upregulated	protein_coding
ENSG00000178115.12	14.0523	7.52593	1.99516	3.7721	0.00016188	0.00304264	Upregulated	protein_coding
ENSG00000178234.13	1032.26	1.42402	0.535288	2.6603	0.00780721	0.0495913	Upregulated	protein_coding
ENSG00000178301.4	34.1345	3.76042	1.13226	3.32118	0.00089639	0.0110539	Upregulated	protein_coding
ENSG00000178307.10	289.881	-1.97698	0.6884	-2.87185	0.00408075	0.0320396	Downregulated	protein_coding
ENSG00000178752.16	1047.03	-3.3333	0.772194	-4.31666	1.58409e-05	0.000539198	Downregulated	protein_coding
ENSG00000178789.9	146.621	10.5487	2.10867	5.00255	5.6576e-07	4.10917e-05	Upregulated	protein_coding
ENSG00000178917.18	204.883	8.41336	1.58206	5.31796	1.04935e-07	1.28084e-05	Upregulated	protein_coding
ENSG00000178921.14	579.138	-2.06083	0.649942	-3.17079	0.00152024	0.0159818	Downregulated	protein_coding
ENSG00000178935.5	268.341	1.2732	0.465326	2.73615	0.00621633	0.0426584	Upregulated	protein_coding
ENSG00000178951.9	1871.61	-3.11534	0.908975	-3.42731	0.000609589	0.00835333	Downregulated	protein_coding
ENSG00000178982.10	2537.62	12.9554	1.87768	6.89968	5.2121e-12	1.52686e-08	Upregulated	protein_coding
ENSG00000178999.13	331.323	-4.23526	1.34273	-3.15422	0.00160926	0.0166646	Downregulated	protein_coding
ENSG00000179051.14	1361.19	4.15386	1.05223	3.94766	7.89201e-05	0.00178145	Upregulated	protein_coding
ENSG00000179094.16	3964.75	-3.94974	1.19288	-3.31111	0.000929271	0.0113532	Downregulated	protein_coding
ENSG00000179115.11	585.223	-1.35974	0.463562	-2.93324	0.00335446	0.0280318	Downregulated	protein_coding
ENSG00000179144.5	874.695	3.52857	0.971231	3.63309	0.00028005	0.00464408	Upregulated	protein_coding
ENSG00000179218.15	4738.98	-1.39314	0.468512	-2.97353	0.00294391	0.0257574	Downregulated	protein_coding
ENSG00000179455.10	8.82747	6.82402	2.20332	3.09715	0.00195388	0.0192432	Upregulated	protein_coding
ENSG00000179588.9	908.934	-3.51021	1.15225	-3.04639	0.00231604	0.0216691	Downregulated	protein_coding
ENSG00000179604.10	363.768	-2.94558	0.962209	-3.06126	0.00220406	0.020933	Downregulated	protein_coding
ENSG00000179639.11	125.711	6.68786	1.56819	4.2647	2.00169e-05	0.000642025	Upregulated	protein_coding
ENSG00000179820.16	1176.15	-2.40964	0.898647	-2.68141	0.0073313	0.047468	Downregulated	protein_coding
ENSG00000179833.4	2070.94	-1.9138	0.551971	-3.46722	0.000525874	0.00750659	Downregulated	protein_coding
ENSG00000179841.8	192.487	2.62023	0.832134	3.14881	0.00163936	0.016906	Upregulated	protein_coding
ENSG00000179886.6	71.2295	5.99233	1.5231	3.93431	8.34361e-05	0.00184701	Upregulated	protein_coding
ENSG00000179889.20	1126.07	4.37906	0.926499	4.72646	2.28464e-06	0.000124968	Upregulated	protein_coding
ENSG00000179914.5	1751.09	3.83138	0.925442	4.14006	3.47216e-05	0.000961593	Upregulated	protein_coding
ENSG00000179950.15	848.591	4.90413	1.09104	4.49491	6.96006e-06	0.000293603	Upregulated	protein_coding
ENSG00000179988.15	172.074	1.23651	0.450291	2.74602	0.00603227	0.0418089	Upregulated	protein_coding
ENSG00000180089.6	279.969	-3.8586	1.17262	-3.29058	0.000999801	0.0119143	Downregulated	protein_coding
ENSG00000180113.16	23.5443	5.14235	1.91354	2.68735	0.0072021	0.0468616	Upregulated	protein_coding
ENSG00000180138.7	79.2186	7.97227	2.24715	3.54773	0.000388573	0.00600863	Upregulated	protein_coding
ENSG00000180332.7	52.447	8.91575	2.01596	4.42258	9.7527e-06	0.000378689	Upregulated	protein_coding
ENSG00000180336.18	35.7738	4.63984	1.62785	2.85029	0.00436792	0.0336726	Upregulated	protein_coding
ENSG00000180376.17	2809.32	2.08054	0.68091	3.05552	0.00224669	0.0212384	Upregulated	protein_coding
ENSG00000180543.5	127.113	-1.95127	0.717774	-2.71851	0.00655773	0.0442186	Downregulated	protein_coding
ENSG00000180574.4	40.8007	-6.06024	1.68103	-3.60508	0.000312056	0.00505987	Downregulated	protein_coding
ENSG00000180596.9	1791.41	-6.9588	1.46172	-4.76071	1.92914e-06	0.000109616	Downregulated	protein_coding
ENSG00000180767.11	19.1222	-2.73633	0.911178	-3.00306	0.00267276	0.0239848	Downregulated	protein_coding
ENSG00000180871.8	337.458	2.07125	0.731244	2.83251	0.00461848	0.0349602	Upregulated	protein_coding
ENSG00000180878.3	8.08098	6.11228	2.21564	2.7587	0.00580313	0.040713	Upregulated	protein_coding
ENSG00000180900.20	354.292	3.75322	0.983838	3.81488	0.000136249	0.00266879	Upregulated	protein_coding
ENSG00000180917.18	636.45	4.49363	1.08719	4.13325	3.57664e-05	0.000979213	Upregulated	protein_coding
ENSG00000181031.16	33.1935	3.16092	1.11015	2.8473	0.00440922	0.0338468	Upregulated	protein_coding
ENSG00000181035.14	479.451	-1.85576	0.622694	-2.98021	0.00288049	0.0253316	Downregulated	protein_coding
ENSG00000181135.16	162.392	5.66379	1.25018	4.53036	5.88822e-06	0.000255681	Upregulated	protein_coding
ENSG00000181143.16	10.6474	7.32855	2.72146	2.69287	0.00708394	0.046402	Upregulated	protein_coding
ENSG00000181218.6	370.315	8.29457	1.84991	4.48376	7.33385e-06	0.000304021	Upregulated	protein_coding
ENSG00000181220.18	1279.31	-1.74238	0.501139	-3.47684	0.000507364	0.00732165	Downregulated	protein_coding
ENSG00000181222.19	1846.23	9.0529	1.5795	5.7315	9.95438e-09	2.67417e-06	Upregulated	protein_coding
ENSG00000181284.3	49.4103	8.74398	1.99503	4.38287	1.17125e-05	0.0004331	Upregulated	protein_coding
ENSG00000181322.15	58.6026	4.12022	1.15689	3.56148	0.000368777	0.0057529	Upregulated	protein_coding
ENSG00000181418.8	39.445	-3.08293	0.880766	-3.50028	0.000464767	0.00689178	Downregulated	protein_coding
ENSG00000181481.14	161.293	7.61086	1.64082	4.63844	3.51043e-06	0.000171393	Upregulated	protein_coding
ENSG00000181541.6	24.3751	6.28726	1.78364	3.52496	0.00042354	0.0064287	Upregulated	protein_coding
ENSG00000181588.17	83.8438	-2.17158	0.749656	-2.89677	0.00377023	0.0303425	Downregulated	protein_coding
ENSG00000181649.8	10.3213	7.1335	2.43474	2.92988	0.0033909	0.0282557	Upregulated	protein_coding
ENSG00000181804.15	485.305	1.32304	0.468652	2.82307	0.0047566	0.0356725	Upregulated	protein_coding
ENSG00000181847.12	303.259	2.52807	0.732419	3.45168	0.000557114	0.00784633	Upregulated	protein_coding
ENSG00000181885.18	12.3049	6.40039	1.96039	3.26486	0.0010952	0.0127709	Upregulated	protein_coding
ENSG00000182117.7	723.732	7.29709	1.48161	4.9251	8.43189e-07	5.5867e-05	Upregulated	protein_coding
ENSG00000182158.16	1019.91	-1.69359	0.561568	-3.01583	0.00256277	0.023267	Downregulated	protein_coding
ENSG00000182162.11	14.1998	5.76039	1.97625	2.91481	0.003559	0.0291951	Upregulated	protein_coding
ENSG00000182208.15	648.177	8.72306	1.43797	6.06625	1.30935e-09	7.84566e-07	Upregulated	protein_coding
ENSG00000182307.14	286.342	8.30701	1.71747	4.83678	1.31961e-06	8.05356e-05	Upregulated	protein_coding
ENSG00000182325.11	61.6701	8.99503	2.15189	4.18007	2.91424e-05	0.000840633	Upregulated	protein_coding
ENSG00000182362.14	223.861	2.23561	0.568313	3.93377	8.36226e-05	0.00184804	Upregulated	protein_coding
ENSG00000182372.10	516.355	7.6569	1.47459	5.19257	2.07416e-07	2.02464e-05	Upregulated	protein_coding
ENSG00000182518.14	843.902	2.52195	0.890252	2.83285	0.0046135	0.0349582	Upregulated	protein_coding
ENSG00000182551.14	514.366	1.38897	0.513086	2.7071	0.00678736	0.0451688	Upregulated	protein_coding
ENSG00000182732.18	1071.3	3.25868	0.704411	4.6261	3.72615e-06	0.000179757	Upregulated	protein_coding
ENSG00000182774.13	153.457	9.96925	2.03274	4.90433	9.3745e-07	6.10268e-05	Upregulated	protein_coding
ENSG00000182866.18	2362.46	2.3808	0.594726	4.00319	6.24941e-05	0.00148784	Upregulated	protein_coding
ENSG00000182871.16	487.998	6.59894	1.23381	5.34843	8.87228e-08	1.1814e-05	Upregulated	protein_coding
ENSG00000182902.14	20.4574	4.95928	1.85195	2.67786	0.00740938	0.0477507	Upregulated	protein_coding
ENSG00000182952.5	854.464	12.8542	2.24157	5.73447	9.78206e-09	2.67417e-06	Upregulated	protein_coding
ENSG00000182973.20	1045.32	5.56392	1.36927	4.06341	4.83609e-05	0.00122688	Upregulated	protein_coding
ENSG00000182993.5	106.986	3.42514	0.975195	3.51226	0.000444313	0.00666194	Upregulated	protein_coding
ENSG00000183020.15	764.292	3.37004	0.940607	3.58283	0.000339889	0.00540481	Upregulated	protein_coding
ENSG00000183091.21	323.46	2.27513	0.457504	4.97291	6.59569e-07	4.60814e-05	Upregulated	protein_coding
ENSG00000183172.9	192.797	10.5346	2.10234	5.01089	5.41802e-07	3.97281e-05	Upregulated	protein_coding
ENSG00000183309.12	314.193	4.28643	1.05851	4.04948	5.13305e-05	0.00128035	Upregulated	protein_coding
ENSG00000183323.13	782.237	6.40094	1.52598	4.19464	2.73303e-05	0.000799862	Upregulated	protein_coding
ENSG00000183337.18	1287.94	-1.55203	0.541541	-2.86596	0.00415751	0.0324298	Downregulated	protein_coding
ENSG00000183426.17	27.469	3.94401	1.24014	3.18029	0.00147127	0.0156329	Upregulated	protein_coding
ENSG00000183474.16	145.005	2.71049	0.997979	2.71598	0.00660792	0.044466	Upregulated	protein_coding
ENSG00000183682.8	64.4261	4.49573	1.09722	4.09737	4.17874e-05	0.00110173	Upregulated	protein_coding
ENSG00000183688.4	1706.07	8.33238	1.45255	5.73636	9.67315e-09	2.67417e-06	Upregulated	protein_coding
ENSG00000183741.12	1071.96	-2.14513	0.665374	-3.22395	0.00126437	0.0141251	Downregulated	protein_coding
ENSG00000183751.16	172.057	10.2813	2.14831	4.78575	1.70349e-06	9.88278e-05	Upregulated	protein_coding
ENSG00000183762.13	587.883	-2.65764	0.738559	-3.59842	0.000320161	0.00514385	Downregulated	protein_coding
ENSG00000183763.9	103.912	-2.18218	0.736532	-2.96278	0.00304875	0.0263542	Downregulated	protein_coding
ENSG00000183801.8	18.4082	4.02662	1.47093	2.73746	0.00619157	0.042555	Upregulated	protein_coding
ENSG00000183856.11	253.266	9.09733	2.23664	4.06742	4.75366e-05	0.00121559	Upregulated	protein_coding
ENSG00000183864.5	474.541	-2.44339	0.827585	-2.95244	0.00315277	0.0269355	Downregulated	protein_coding
ENSG00000183921.8	28.8788	7.54226	2.20828	3.41544	0.000636782	0.0085964	Upregulated	protein_coding
ENSG00000183977.14	78.266	7.7727	1.88159	4.13091	3.61324e-05	0.000986161	Upregulated	protein_coding
ENSG00000184009.13	10189.4	8.44362	1.19425	7.07025	1.54655e-12	5.82498e-09	Upregulated	protein_coding
ENSG00000184060.11	103.074	4.93832	1.1773	4.19461	2.73346e-05	0.000799862	Upregulated	protein_coding
ENSG00000184110.15	100.11	-3.03388	0.757889	-4.00307	6.25269e-05	0.00148784	Downregulated	protein_coding
ENSG00000184194.6	17.8891	-4.86037	1.42086	-3.42072	0.000624546	0.00849209	Downregulated	protein_coding
ENSG00000184350.11	18.1284	-8.42768	1.95016	-4.32153	1.54953e-05	0.000532998	Downregulated	protein_coding
ENSG00000184371.14	150.031	-3.104	1.15399	-2.68981	0.0071493	0.0466644	Downregulated	protein_coding
ENSG00000184434.8	23.696	7.73202	2.09088	3.69797	0.000217329	0.00384556	Upregulated	protein_coding
ENSG00000184489.13	75.9216	5.60649	1.57707	3.555	0.000377983	0.00585863	Upregulated	protein_coding
ENSG00000184584.14	251.384	11.0399	2.02363	5.45549	4.88379e-08	7.619e-06	Upregulated	protein_coding
ENSG00000184611.14	34.7955	8.45583	2.26586	3.73184	0.000190085	0.00343496	Upregulated	protein_coding
ENSG00000184613.11	1970.75	3.03807	0.582066	5.21946	1.79448e-07	1.8267e-05	Upregulated	protein_coding
ENSG00000184752.14	558.458	1.41419	0.530235	2.66709	0.00765104	0.0488662	Upregulated	protein_coding
ENSG00000184786.6	99.2902	9.40796	2.07827	4.52683	5.98752e-06	0.000258365	Upregulated	protein_coding
ENSG00000184897.7	1664.16	-3.49115	0.66754	-5.22988	1.69619e-07	1.74688e-05	Downregulated	protein_coding
ENSG00000184900.16	1025.45	-1.6469	0.440109	-3.74202	0.000182549	0.00332612	Downregulated	protein_coding
ENSG00000184956.16	56.9328	8.86829	2.131	4.16157	3.16069e-05	0.000896038	Upregulated	protein_coding
ENSG00000184967.7	86.7521	7.83811	1.92507	4.0716	4.66905e-05	0.00120332	Upregulated	protein_coding
ENSG00000184983.11	921.901	12.6366	2.25291	5.60899	2.03506e-08	4.25829e-06	Upregulated	protein_coding
ENSG00000184984.10	28.2827	8.21132	2.10291	3.90475	9.43246e-05	0.00202349	Upregulated	protein_coding
ENSG00000185000.12	344.387	9.88309	2.07674	4.75894	1.94609e-06	0.000110341	Upregulated	protein_coding
ENSG00000185013.17	11.5087	6.78942	2.43737	2.78556	0.0053436	0.0384719	Upregulated	protein_coding
ENSG00000185115.6	502.495	8.14218	1.54266	5.278	1.306e-07	1.4778e-05	Upregulated	protein_coding
ENSG00000185122.11	298.033	11.2493	2.03295	5.53348	3.13937e-08	5.63058e-06	Upregulated	protein_coding
ENSG00000185163.10	221.682	9.2678	1.89976	4.87839	1.06954e-06	6.69799e-05	Upregulated	protein_coding
ENSG00000185271.9	15.4708	7.7408	1.91852	4.03477	5.46552e-05	0.00134045	Upregulated	protein_coding
ENSG00000185272.14	32.5081	3.21755	1.09243	2.94533	0.00322612	0.0273847	Upregulated	protein_coding
ENSG00000185340.16	209.909	-4.15219	1.10631	-3.7532	0.000174594	0.00321227	Downregulated	protein_coding
ENSG00000185418.16	504.74	1.33452	0.495473	2.69343	0.0070722	0.0463943	Upregulated	protein_coding
ENSG00000185475.11	180.369	-2.45364	0.831014	-2.95259	0.00315123	0.026931	Downregulated	protein_coding
ENSG00000185499.17	57.9874	-3.13376	1.12896	-2.7758	0.00550661	0.0393372	Downregulated	protein_coding
ENSG00000185507.21	340.232	2.67631	1.00274	2.66899	0.00760798	0.0486855	Upregulated	protein_coding
ENSG00000185561.10	30.3385	5.34035	1.89971	2.81114	0.00493658	0.036346	Upregulated	protein_coding
ENSG00000185567.7	102.796	5.97596	1.46986	4.06567	4.78939e-05	0.00121884	Upregulated	protein_coding
ENSG00000185658.14	8381.7	1.01934	0.376463	2.70768	0.00677547	0.0451442	Upregulated	protein_coding
ENSG00000185662.11	13.0469	7.30682	2.27803	3.20752	0.00133884	0.0146833	Upregulated	protein_coding
ENSG00000185664.15	111.326	5.19908	1.08627	4.78617	1.69997e-06	9.88278e-05	Upregulated	protein_coding
ENSG00000185716.12	134.737	5.68344	1.2814	4.43533	9.19322e-06	0.000362692	Upregulated	protein_coding
ENSG00000185803.12	106.609	9.37652	2.04996	4.57399	4.78517e-06	0.000216428	Upregulated	protein_coding
ENSG00000185829.19	155.869	3.94527	1.17	3.37204	0.000746139	0.00967157	Upregulated	protein_coding
ENSG00000185862.7	597.478	12.5125	2.21	5.66177	1.49815e-08	3.40507e-06	Upregulated	protein_coding
ENSG00000185864.19	200.715	2.884	0.951072	3.03237	0.0024264	0.0224113	Upregulated	protein_coding
ENSG00000185880.13	313.766	6.62867	1.34245	4.93774	7.90335e-07	5.30208e-05	Upregulated	protein_coding
ENSG00000185883.12	541.578	-5.86335	1.42058	-4.12743	3.66836e-05	0.000997076	Downregulated	protein_coding
ENSG00000185899.1	12.9314	7.0974	2.18461	3.24882	0.00115885	0.0133477	Upregulated	protein_coding
ENSG00000185950.9	2765.13	-2.14901	0.731956	-2.93598	0.00332492	0.0278733	Downregulated	protein_coding
ENSG00000185989.11	2370.26	6.41569	1.11488	5.75462	8.68347e-09	2.51582e-06	Upregulated	protein_coding
ENSG00000186010.19	141.856	-3.4898	1.08054	-3.22967	0.00123934	0.0139383	Downregulated	protein_coding
ENSG00000186104.11	453.844	1.31727	0.462546	2.84788	0.00440116	0.0338102	Upregulated	protein_coding
ENSG00000186166.9	631.839	12.2239	2.0329	6.01303	1.82085e-09	1.01924e-06	Upregulated	protein_coding
ENSG00000186185.14	531.68	-4.88585	1.13049	-4.32188	1.54706e-05	0.000532998	Downregulated	protein_coding
ENSG00000186187.12	276.346	-2.13942	0.648039	-3.30137	0.000962126	0.0116413	Downregulated	protein_coding
ENSG00000186395.9	99.2748	-1.75215	0.467644	-3.74676	0.000179133	0.00328202	Downregulated	protein_coding
ENSG00000186399.11	20.9005	6.22294	1.88909	3.29415	0.000987181	0.0118305	Upregulated	protein_coding
ENSG00000186416.18	188.326	7.22367	1.38523	5.21477	1.84045e-07	1.8502e-05	Upregulated	protein_coding
ENSG00000186431.19	956.85	12.6334	2.16126	5.84539	5.05371e-09	1.85057e-06	Upregulated	protein_coding
ENSG00000186446.12	33.5076	8.45562	2.27756	3.71258	0.000205157	0.00366709	Upregulated	protein_coding
ENSG00000186448.15	480.508	8.3901	1.60454	5.22898	1.70444e-07	1.74854e-05	Upregulated	protein_coding
ENSG00000186496.12	31.5772	2.21832	0.6842	3.24221	0.00118605	0.0135311	Upregulated	protein_coding
ENSG00000186575.19	936.673	-1.17837	0.41735	-2.82345	0.00475102	0.0356665	Downregulated	protein_coding
ENSG00000186628.12	17.2787	7.17386	2.36656	3.03134	0.00243468	0.0224396	Upregulated	protein_coding
ENSG00000186648.15	35.6271	7.81285	1.94069	4.02581	5.67787e-05	0.0013797	Upregulated	protein_coding
ENSG00000186654.21	1053.17	-2.59048	0.94529	-2.74041	0.00613627	0.0422851	Downregulated	protein_coding
ENSG00000186767.7	304.894	-3.00038	0.792781	-3.78463	0.00015394	0.00292021	Downregulated	protein_coding
ENSG00000186818.13	86.8799	8.37211	1.82482	4.58792	4.47686e-06	0.000205902	Upregulated	protein_coding
ENSG00000186854.11	1477.34	2.09644	0.627382	3.34156	0.000833081	0.0104891	Upregulated	protein_coding
ENSG00000186868.18	37.5251	8.62751	2.0245	4.26155	2.0301e-05	0.000647202	Upregulated	protein_coding
ENSG00000186951.17	652.113	-1.42499	0.500926	-2.84471	0.00444518	0.0340055	Downregulated	protein_coding
ENSG00000186998.16	135.58	-2.54012	0.942574	-2.69487	0.00704153	0.0462819	Downregulated	protein_coding
ENSG00000187017.18	633.218	-4.12799	0.954139	-4.3264	1.51565e-05	0.00052579	Downregulated	protein_coding
ENSG00000187024.15	23.6707	-6.10033	2.14999	-2.83737	0.00454868	0.0346171	Downregulated	protein_coding
ENSG00000187105.9	35.16	7.95197	1.99526	3.98543	6.73588e-05	0.00157859	Upregulated	protein_coding
ENSG00000187116.14	714.825	7.19964	1.69876	4.23817	2.25347e-05	0.000699797	Upregulated	protein_coding
ENSG00000187144.11	36.0624	8.21597	2.28078	3.60226	0.000315463	0.00509107	Upregulated	protein_coding
ENSG00000187187.14	199.015	10.9175	2.05565	5.31098	1.09035e-07	1.31867e-05	Upregulated	protein_coding
ENSG00000187266.14	1131.19	-3.73444	0.75521	-4.9449	7.61814e-07	5.12378e-05	Downregulated	protein_coding
ENSG00000187605.16	4406.19	-2.11008	0.618709	-3.41046	0.00064854	0.00871052	Downregulated	protein_coding
ENSG00000187627.18	25.9304	4.34689	1.35388	3.21069	0.00132416	0.0145707	Upregulated	protein_coding
ENSG00000187630.18	66.2403	7.71034	1.78623	4.31654	1.58497e-05	0.000539198	Upregulated	protein_coding
ENSG00000187650.4	101.066	5.15969	1.15595	4.46359	8.05975e-06	0.000327849	Upregulated	protein_coding
ENSG00000187726.9	53.8169	5.94922	1.41582	4.20196	2.64612e-05	0.000783051	Upregulated	protein_coding
ENSG00000187741.16	770.512	-2.24434	0.71947	-3.11944	0.00181197	0.0182199	Downregulated	protein_coding
ENSG00000187775.17	195.74	4.59103	0.992491	4.62577	3.73214e-06	0.000179757	Upregulated	protein_coding
ENSG00000187800.14	186.992	-3.73652	1.05996	-3.52515	0.000423242	0.00642841	Downregulated	protein_coding
ENSG00000187840.5	147.257	-1.96255	0.684877	-2.86555	0.00416283	0.0324521	Downregulated	protein_coding
ENSG00000187848.15	6.75138	6.29882	2.02468	3.11101	0.00186448	0.0185568	Upregulated	protein_coding
ENSG00000187862.13	104.06	9.4489	2.00812	4.70536	2.53421e-06	0.000134707	Upregulated	protein_coding
ENSG00000187994.14	275.83	9.76231	1.91773	5.09055	3.57035e-07	2.96947e-05	Upregulated	protein_coding
ENSG00000188056.12	64.0969	6.36273	1.63276	3.8969	9.74302e-05	0.00206823	Upregulated	protein_coding
ENSG00000188070.9	178.368	-1.59218	0.5855	-2.71935	0.00654113	0.0441405	Downregulated	protein_coding
ENSG00000188107.15	62.8776	5.55179	1.46587	3.78736	0.000152259	0.00289632	Upregulated	protein_coding
ENSG00000188152.13	55.169	6.77044	1.9387	3.49225	0.000478966	0.00703899	Upregulated	protein_coding
ENSG00000188157.15	277.044	-2.74112	0.91729	-2.98828	0.00280551	0.0249048	Downregulated	protein_coding
ENSG00000188163.8	190.595	4.39991	1.15321	3.81535	0.000135988	0.00266765	Upregulated	protein_coding
ENSG00000188312.15	206.805	8.20437	1.71259	4.79063	1.66262e-06	9.71643e-05	Upregulated	protein_coding
ENSG00000188389.11	52.3253	6.18311	2.03086	3.04457	0.00233013	0.0217443	Upregulated	protein_coding
ENSG00000188452.15	79.7281	5.90576	1.46472	4.032	5.53031e-05	0.00135141	Upregulated	protein_coding
ENSG00000188493.15	107.032	-3.40472	0.856316	-3.976	7.00831e-05	0.00162797	Downregulated	protein_coding
ENSG00000188501.12	7.12729	6.451	2.42631	2.65878	0.00784253	0.049741	Upregulated	protein_coding
ENSG00000188566.15	487.525	-3.07239	0.858175	-3.58014	0.000343408	0.00544434	Downregulated	protein_coding
ENSG00000188626.7	19.0385	7.51738	2.22098	3.38471	0.000712525	0.00935544	Upregulated	protein_coding
ENSG00000188649.16	73.8057	2.12305	0.772247	2.74919	0.00597436	0.0415166	Upregulated	protein_coding
ENSG00000188677.15	511.999	-2.15878	0.777842	-2.77535	0.00551423	0.0393778	Downregulated	protein_coding
ENSG00000188735.13	464.637	-2.65878	0.682057	-3.89818	9.69182e-05	0.0020625	Downregulated	protein_coding
ENSG00000188738.16	49.3872	3.64533	1.2582	2.89725	0.00376445	0.0303052	Upregulated	protein_coding
ENSG00000188807.13	183.272	-3.74176	1.3026	-2.87252	0.00407208	0.0319906	Downregulated	protein_coding
ENSG00000188827.12	405.246	-2.25999	0.731811	-3.08822	0.00201361	0.0196334	Downregulated	protein_coding
ENSG00000188869.13	21.4345	7.97017	1.91051	4.17174	3.02277e-05	0.000862504	Upregulated	protein_coding
ENSG00000188931.4	47.6079	7.35049	1.91321	3.84196	0.000122057	0.00246558	Upregulated	protein_coding
ENSG00000189042.14	387.996	1.389	0.465099	2.98646	0.00282229	0.0250201	Upregulated	protein_coding
ENSG00000189060.6	5204.26	-3.71061	0.941936	-3.93935	8.1704e-05	0.00182036	Downregulated	protein_coding
ENSG00000189068.11	105.106	8.86624	2.03255	4.36213	1.28803e-05	0.000464833	Upregulated	protein_coding
ENSG00000189129.14	33.1236	5.10866	1.29044	3.95884	7.53143e-05	0.00172303	Upregulated	protein_coding
ENSG00000189195.15	160.669	1.64368	0.48489	3.3898	0.000699431	0.00922025	Upregulated	protein_coding
ENSG00000189292.17	27.5887	3.44004	1.13474	3.03156	0.00243296	0.0224396	Upregulated	protein_coding
ENSG00000189306.11	822.751	-1.57605	0.495163	-3.1829	0.0014581	0.0155487	Downregulated	protein_coding
ENSG00000189430.13	101.983	8.98875	2.03355	4.42023	9.85944e-06	0.000380824	Upregulated	protein_coding
ENSG00000196074.13	226.555	1.73734	0.646845	2.68587	0.00723402	0.0470229	Upregulated	protein_coding
ENSG00000196092.14	2218.83	-3.18917	1.18828	-2.68385	0.00727808	0.0472294	Downregulated	protein_coding
ENSG00000196118.12	70.8714	-3.10948	1.08085	-2.87689	0.00401615	0.0316644	Downregulated	protein_coding
ENSG00000196132.14	22.8717	4.7962	1.62881	2.94461	0.00323365	0.0274309	Upregulated	protein_coding
ENSG00000196152.10	828.16	1.99384	0.700267	2.84726	0.00440978	0.0338468	Upregulated	protein_coding
ENSG00000196199.14	1459.79	1.14014	0.40839	2.7918	0.0052416	0.0379135	Upregulated	protein_coding
ENSG00000196230.14	5020.79	11.1614	1.82681	6.10978	9.97683e-10	6.88234e-07	Upregulated	protein_coding
ENSG00000196305.19	3251.84	5.43893	1.16335	4.67524	2.93605e-06	0.000150074	Upregulated	protein_coding
ENSG00000196345.13	64.632	6.34693	1.77929	3.5671	0.000360948	0.00565106	Upregulated	protein_coding
ENSG00000196363.10	537.626	-1.3391	0.462875	-2.89301	0.00381569	0.0305591	Downregulated	protein_coding
ENSG00000196428.13	1715.57	-1.72886	0.571934	-3.02282	0.00250428	0.0229494	Downregulated	protein_coding
ENSG00000196497.17	12.0568	6.4815	2.19482	2.95309	0.00314615	0.0269138	Upregulated	protein_coding
ENSG00000196511.15	409.607	2.8552	0.601595	4.74605	2.0743e-06	0.000116112	Upregulated	protein_coding
ENSG00000196517.13	1809.98	-3.44296	0.927785	-3.71094	0.000206489	0.00368341	Downregulated	protein_coding
ENSG00000196531.14	12065.9	1.80739	0.64078	2.82061	0.00479329	0.035793	Upregulated	protein_coding
ENSG00000196553.15	29.0853	8.30593	1.96634	4.22406	2.39942e-05	0.000734735	Upregulated	protein_coding
ENSG00000196565.15	6892.41	9.73231	1.62907	5.97417	2.31267e-09	1.14561e-06	Upregulated	protein_coding
ENSG00000196616.15	41.4572	3.50818	1.15526	3.03671	0.00239179	0.0221417	Upregulated	protein_coding
ENSG00000196642.19	1224.38	-2.43541	0.748336	-3.25443	0.0011362	0.0131386	Downregulated	protein_coding
ENSG00000196653.12	75.5096	5.1629	1.53946	3.35371	0.000797369	0.0101433	Upregulated	protein_coding
ENSG00000196655.12	396.868	8.51349	1.77656	4.79212	1.65025e-06	9.66863e-05	Upregulated	protein_coding
ENSG00000196683.12	1850.61	2.62877	0.806017	3.26143	0.00110851	0.0128796	Upregulated	protein_coding
ENSG00000196712.20	1613.89	5.53451	0.992866	5.57428	2.48557e-08	4.93043e-06	Upregulated	protein_coding
ENSG00000196781.16	549.071	-2.66729	0.745952	-3.57568	0.000349313	0.00550816	Downregulated	protein_coding
ENSG00000196890.5	1524.37	9.71693	1.70696	5.69255	1.25157e-08	3.02731e-06	Upregulated	protein_coding
ENSG00000196911.12	1260.08	1.6432	0.57617	2.85194	0.00434535	0.0335673	Upregulated	protein_coding
ENSG00000196912.13	1131.79	9.24876	1.50109	6.16134	7.21312e-10	5.67708e-07	Upregulated	protein_coding
ENSG00000196923.14	616.745	-2.17548	0.726096	-2.99614	0.00273422	0.0244117	Downregulated	protein_coding
ENSG00000196943.14	548.861	6.8247	1.33879	5.09767	3.43854e-07	2.88143e-05	Upregulated	protein_coding
ENSG00000196954.14	1522.04	5.39093	1.16559	4.62508	3.74462e-06	0.000179757	Upregulated	protein_coding
ENSG00000196998.19	2276.4	11.4223	1.95902	5.83062	5.52216e-09	1.86836e-06	Upregulated	protein_coding
ENSG00000197006.15	7717.56	5.72726	1.30907	4.37504	1.21409e-05	0.000445195	Upregulated	protein_coding
ENSG00000197020.12	504.372	5.87629	1.27521	4.6081	4.06356e-06	0.00019045	Upregulated	protein_coding
ENSG00000197057.10	298.145	2.35204	0.735878	3.19624	0.00139232	0.015084	Upregulated	protein_coding
ENSG00000197063.11	855.059	-2.74023	0.874903	-3.13204	0.00173596	0.0176304	Downregulated	protein_coding
ENSG00000197140.15	33.9413	4.70186	1.43728	3.27136	0.00107031	0.0125244	Upregulated	protein_coding
ENSG00000197226.13	841.555	3.93603	0.911225	4.31949	1.5639e-05	0.000535482	Upregulated	protein_coding
ENSG00000197249.14	943.115	2.811	0.880966	3.19081	0.00141874	0.015277	Upregulated	protein_coding
ENSG00000197265.9	541.771	1.21393	0.414557	2.92826	0.00340866	0.0283231	Upregulated	protein_coding
ENSG00000197283.18	188.657	2.5628	0.909808	2.81685	0.00484967	0.0360446	Upregulated	protein_coding
ENSG00000197471.12	2810.61	-1.7708	0.582357	-3.04075	0.00235991	0.021939	Downregulated	protein_coding
ENSG00000197561.7	667.872	5.91583	1.7721	3.33832	0.000842869	0.0105519	Upregulated	protein_coding
ENSG00000197565.17	12.4687	6.98474	2.52402	2.76731	0.00565217	0.0399514	Upregulated	protein_coding
ENSG00000197635.11	701.855	2.70103	0.684798	3.94428	8.00415e-05	0.00179906	Upregulated	protein_coding
ENSG00000197696.10	17.458	7.16802	2.0498	3.49694	0.000470629	0.00696695	Upregulated	protein_coding
ENSG00000197728.11	2278.83	3.59286	1.05184	3.41579	0.000635982	0.00858999	Upregulated	protein_coding
ENSG00000197753.11	102.227	7.16985	1.6847	4.25587	2.08242e-05	0.000662281	Upregulated	protein_coding
ENSG00000197766.9	339.048	5.30416	1.464	3.62305	0.000291146	0.00479302	Upregulated	protein_coding
ENSG00000197776.8	176.107	1.44957	0.538028	2.69422	0.00705535	0.0463414	Upregulated	protein_coding
ENSG00000197782.15	435.767	10.4456	1.92639	5.42237	5.88126e-08	8.7112e-06	Upregulated	protein_coding
ENSG00000197857.16	823.831	1.54523	0.457456	3.37788	0.000730475	0.00953414	Upregulated	protein_coding
ENSG00000197858.12	404.305	-2.38505	0.73251	-3.25599	0.00112997	0.0130779	Downregulated	protein_coding
ENSG00000197863.9	315.475	2.08853	0.567122	3.68268	0.000230794	0.00402972	Upregulated	protein_coding
ENSG00000197885.11	187.788	1.87684	0.594171	3.15875	0.00158445	0.0164725	Upregulated	protein_coding
ENSG00000197933.13	92.1901	1.93973	0.582301	3.33115	0.000864885	0.0107661	Upregulated	protein_coding
ENSG00000197935.7	18.6246	7.59285	2.28887	3.3173	0.000908933	0.0111766	Upregulated	protein_coding
ENSG00000197958.13	12538.1	2.18293	0.68422	3.19039	0.00142079	0.015277	Upregulated	protein_coding
ENSG00000197976.12	5.93572	5.58902	1.93291	2.89151	0.00383401	0.0306314	Upregulated	protein_coding
ENSG00000197978.10	71.3949	4.01699	0.970238	4.14021	3.46982e-05	0.000961593	Upregulated	protein_coding
ENSG00000197993.9	1789.68	3.2667	1.19012	2.74486	0.00605363	0.041869	Upregulated	protein_coding
ENSG00000198000.12	1310.66	6.88982	1.27522	5.40286	6.55849e-08	9.39753e-06	Upregulated	protein_coding
ENSG00000198162.12	7312.64	2.20603	0.666533	3.3097	0.000933945	0.0113945	Upregulated	protein_coding
ENSG00000198169.9	201.233	7.85482	1.68462	4.66266	3.12146e-06	0.000156122	Upregulated	protein_coding
ENSG00000198258.11	2676.02	2.19501	0.77859	2.81922	0.00481411	0.0358846	Upregulated	protein_coding
ENSG00000198420.10	112.723	2.93576	0.837695	3.50457	0.000457352	0.00681247	Upregulated	protein_coding
ENSG00000198435.4	90.7937	-2.71908	0.874002	-3.11107	0.00186411	0.0185568	Downregulated	protein_coding
ENSG00000198523.6	78.7112	9.51152	2.05243	4.63427	3.58197e-06	0.000174563	Upregulated	protein_coding
ENSG00000198563.14	741.201	8.22813	1.38275	5.95055	2.6724e-09	1.15505e-06	Upregulated	protein_coding
ENSG00000198682.13	135.919	2.35607	0.690769	3.41079	0.000647738	0.00870418	Upregulated	protein_coding
ENSG00000198690.10	840.43	5.9591	1.13025	5.27236	1.34678e-07	1.51097e-05	Upregulated	protein_coding
ENSG00000198707.17	1169.69	1.19725	0.41017	2.91892	0.00351252	0.0289489	Upregulated	protein_coding
ENSG00000198712.1	13063.1	-3.98796	1.15758	-3.4451	0.000570847	0.00795716	Downregulated	protein_coding
ENSG00000198715.13	103.12	-1.97691	0.735721	-2.68703	0.00720894	0.046883	Downregulated	protein_coding
ENSG00000198719.9	24.1592	6.93307	2.56133	2.70682	0.00679303	0.0451926	Upregulated	protein_coding
ENSG00000198727.2	12016.7	-4.33972	1.26912	-3.41946	0.000627451	0.00850423	Downregulated	protein_coding
ENSG00000198728.11	2657.85	-1.8473	0.583583	-3.16544	0.00154847	0.0162005	Downregulated	protein_coding
ENSG00000198736.13	381.454	11.5379	2.23503	5.1623	2.43928e-07	2.24866e-05	Upregulated	protein_coding
ENSG00000198768.11	10.1188	6.71489	2.1774	3.0839	0.00204307	0.01984	Upregulated	protein_coding
ENSG00000198785.7	82.7246	3.99594	1.07612	3.71328	0.000204592	0.00365947	Upregulated	protein_coding
ENSG00000198786.2	9840.93	-4.23175	1.38075	-3.06482	0.00217802	0.0207305	Downregulated	protein_coding
ENSG00000198804.2	78832.1	-3.35504	0.86344	-3.88567	0.000102049	0.00214897	Downregulated	protein_coding
ENSG00000198805.13	11429.6	3.75179	1.30135	2.88299	0.0039392	0.0312717	Upregulated	protein_coding
ENSG00000198824.8	406.196	-2.69621	0.760499	-3.54532	0.000392131	0.00604946	Downregulated	protein_coding
ENSG00000198826.11	461.085	10.2058	2.15739	4.7306	2.23862e-06	0.000123962	Upregulated	protein_coding
ENSG00000198836.11	16722.4	1.80524	0.586287	3.0791	0.00207627	0.0200369	Upregulated	protein_coding
ENSG00000198840.2	1528.67	-4.25208	1.02116	-4.16398	3.12742e-05	0.000889477	Downregulated	protein_coding
ENSG00000198848.13	122.863	3.85498	1.43321	2.68975	0.00715055	0.0466644	Upregulated	protein_coding
ENSG00000198862.14	1845.65	13.8241	2.57901	5.36023	8.31167e-08	1.12378e-05	Upregulated	protein_coding
ENSG00000198870.8	37.8391	8.28032	2.01368	4.11203	3.92198e-05	0.00105621	Upregulated	protein_coding
ENSG00000198888.2	11589.6	-5.5584	1.56129	-3.56013	0.000370677	0.00577253	Downregulated	protein_coding
ENSG00000198899.2	6314.42	-5.42417	1.62481	-3.33834	0.00084282	0.0105519	Downregulated	protein_coding
ENSG00000198925.12	1576.8	-1.99949	0.74707	-2.67645	0.00744076	0.0479178	Downregulated	protein_coding
ENSG00000198932.13	747.016	1.49817	0.550476	2.72159	0.00649677	0.0439086	Upregulated	protein_coding
ENSG00000198938.2	26235.9	-2.4485	0.713438	-3.43198	0.0005992	0.00825819	Downregulated	protein_coding
ENSG00000198967.5	540.033	5.9278	1.62476	3.64843	0.000263853	0.00445923	Upregulated	protein_coding
ENSG00000203734.13	55.0014	4.38498	1.22348	3.58403	0.000338333	0.00538683	Upregulated	protein_coding
ENSG00000203772.8	13.335	6.39455	2.34541	2.72641	0.00640268	0.0434285	Upregulated	protein_coding
ENSG00000203880.13	4822.95	3.13092	0.757324	4.13419	3.56208e-05	0.000977256	Upregulated	protein_coding
ENSG00000203950.7	46.7145	-4.81241	1.63871	-2.93671	0.00331716	0.0278437	Downregulated	protein_coding
ENSG00000204186.10	440.656	9.0064	1.69005	5.32908	9.87107e-08	1.25725e-05	Upregulated	protein_coding
ENSG00000204209.13	122.115	4.8156	1.32145	3.64417	0.000268254	0.00451629	Upregulated	protein_coding
ENSG00000204219.11	70.8618	9.70467	2.06958	4.6892	2.74277e-06	0.000142911	Upregulated	protein_coding
ENSG00000204220.12	204.016	10.2726	2.13153	4.81936	1.44016e-06	8.7087e-05	Upregulated	protein_coding
ENSG00000204227.5	298.781	11.1022	2.13895	5.19047	2.09761e-07	2.02577e-05	Upregulated	protein_coding
ENSG00000204228.4	56.5808	8.419	2.02845	4.15046	3.31812e-05	0.000928686	Upregulated	protein_coding
ENSG00000204231.11	275.724	11.0987	2.06693	5.36968	7.88758e-08	1.07194e-05	Upregulated	protein_coding
ENSG00000204248.12	18.1063	7.36714	2.49964	2.94728	0.00320585	0.0272564	Upregulated	protein_coding
ENSG00000204252.14	600.992	9.98281	1.97369	5.05794	4.23805e-07	3.31562e-05	Upregulated	protein_coding
ENSG00000204256.14	2353.05	4.07226	1.02264	3.98209	6.83133e-05	0.00159529	Upregulated	protein_coding
ENSG00000204257.15	693.168	4.00843	1.1371	3.52513	0.000423278	0.00642841	Upregulated	protein_coding
ENSG00000204264.12	1021.12	12.9983	2.24076	5.80084	6.59847e-09	2.14776e-06	Upregulated	protein_coding
ENSG00000204267.19	775.326	9.32864	1.54936	6.02098	1.73368e-09	9.9366e-07	Upregulated	protein_coding
ENSG00000204287.14	5399.1	15.288	2.55582	5.98163	2.20911e-09	1.14202e-06	Upregulated	protein_coding
ENSG00000204291.11	36.9456	-2.43381	0.834647	-2.91598	0.00354575	0.0291136	Downregulated	protein_coding
ENSG00000204301.6	53.0918	8.93711	2.10349	4.24871	2.15006e-05	0.000677256	Upregulated	protein_coding
ENSG00000204304.12	921.729	8.71315	1.45561	5.98593	2.15154e-09	1.14202e-06	Upregulated	protein_coding
ENSG00000204305.16	184.247	9.29908	1.99032	4.67216	2.98048e-06	0.000151407	Upregulated	protein_coding
ENSG00000204308.8	668.323	9.13259	1.77519	5.14457	2.6814e-07	2.39099e-05	Upregulated	protein_coding
ENSG00000204315.4	66.4275	8.75685	2.03742	4.29802	1.72334e-05	0.000569372	Upregulated	protein_coding
ENSG00000204344.16	99.5399	9.38239	2.34173	4.00661	6.15968e-05	0.00147502	Upregulated	protein_coding
ENSG00000204348.10	111.737	9.67128	2.06013	4.69451	2.67247e-06	0.000139524	Upregulated	protein_coding
ENSG00000204351.13	702.869	10.7975	2.13428	5.05909	4.21272e-07	3.31548e-05	Upregulated	protein_coding
ENSG00000204356.14	626.551	10.7351	2.13531	5.02742	4.97127e-07	3.71296e-05	Upregulated	protein_coding
ENSG00000204366.4	10.9919	6.62989	2.42018	2.73942	0.0061548	0.0423796	Upregulated	protein_coding
ENSG00000204371.12	288.389	11.2797	2.15972	5.22278	1.76258e-07	1.80118e-05	Upregulated	protein_coding
ENSG00000204386.12	393.155	10.1623	2.07728	4.89213	9.97498e-07	6.38326e-05	Upregulated	protein_coding
ENSG00000204388.7	100.496	9.47105	2.09871	4.5128	6.3977e-06	0.000273824	Upregulated	protein_coding
ENSG00000204389.10	597.929	11.9888	2.58916	4.63039	3.64971e-06	0.000177209	Upregulated	protein_coding
ENSG00000204390.10	63.44	9.11275	2.11015	4.31853	1.57073e-05	0.000537126	Upregulated	protein_coding
ENSG00000204392.11	31.5567	7.31428	2.18963	3.34042	0.00083653	0.0105175	Upregulated	protein_coding
ENSG00000204394.13	495.463	11.7521	2.20073	5.3401	9.28936e-08	1.20647e-05	Upregulated	protein_coding
ENSG00000204410.16	31.6715	7.88101	2.06765	3.81157	0.000138087	0.00269878	Upregulated	protein_coding
ENSG00000204420.10	37.1865	8.69826	2.20273	3.94885	7.8529e-05	0.00177871	Upregulated	protein_coding
ENSG00000204427.12	109.461	9.5405	2.08117	4.58419	4.55749e-06	0.000208246	Upregulated	protein_coding
ENSG00000204428.12	18.3669	7.86098	2.12196	3.70459	0.000211734	0.00376424	Upregulated	protein_coding
ENSG00000204435.15	115.054	7.13277	1.68135	4.2423	2.21245e-05	0.000691129	Upregulated	protein_coding
ENSG00000204438.11	238.369	10.8254	2.12898	5.08479	3.68028e-07	2.99477e-05	Upregulated	protein_coding
ENSG00000204439.4	236.776	9.35124	1.9774	4.72905	2.25574e-06	0.000124064	Upregulated	protein_coding
ENSG00000204444.11	75.2303	7.22652	1.98779	3.63545	0.000277494	0.00461586	Upregulated	protein_coding
ENSG00000204463.14	3268.13	12.0458	1.74028	6.9218	4.45936e-12	1.46964e-08	Upregulated	protein_coding
ENSG00000204469.13	1012.46	7.91928	1.44303	5.48797	4.06586e-08	6.61706e-06	Upregulated	protein_coding
ENSG00000204472.13	841.563	12.9045	2.25141	5.73173	9.94093e-09	2.67417e-06	Upregulated	protein_coding
ENSG00000204475.10	52.8591	8.01501	2.16201	3.70721	0.000209557	0.00373562	Upregulated	protein_coding
ENSG00000204482.11	968.491	12.8527	2.62196	4.90196	9.48866e-07	6.16179e-05	Upregulated	protein_coding
ENSG00000204498.11	50.8251	8.67068	2.0269	4.27781	1.88745e-05	0.000611335	Upregulated	protein_coding
ENSG00000204516.10	244.063	8.72352	1.8688	4.66798	3.04174e-06	0.000154044	Upregulated	protein_coding
ENSG00000204520.14	165.748	7.13976	1.42942	4.99486	5.88783e-07	4.23135e-05	Upregulated	protein_coding
ENSG00000204525.18	5742.86	6.29692	1.21917	5.16492	2.40548e-07	2.23311e-05	Upregulated	protein_coding
ENSG00000204531.21	12.7744	6.38603	2.21837	2.8787	0.00399315	0.0315839	Upregulated	protein_coding
ENSG00000204536.15	211.806	5.14644	1.08472	4.7445	2.09024e-06	0.000116757	Upregulated	protein_coding
ENSG00000204560.10	674.045	10.0009	1.87665	5.32913	9.86828e-08	1.25725e-05	Upregulated	protein_coding
ENSG00000204564.12	87.3731	9.3649	2.04517	4.57903	4.67131e-06	0.000212343	Upregulated	protein_coding
ENSG00000204568.12	279.941	10.9556	2.15442	5.08516	3.67325e-07	2.99477e-05	Upregulated	protein_coding
ENSG00000204569.10	916.014	12.9054	2.24223	5.75562	8.63223e-09	2.51582e-06	Upregulated	protein_coding
ENSG00000204574.14	791.508	11.0149	2.12154	5.19194	2.08109e-07	2.02464e-05	Upregulated	protein_coding
ENSG00000204576.12	125.271	10.1184	2.05726	4.91837	8.72668e-07	5.73763e-05	Upregulated	protein_coding
ENSG00000204577.12	593.97	9.19835	1.45768	6.31029	2.78521e-10	3.33782e-07	Upregulated	protein_coding
ENSG00000204580.14	40.2213	8.65041	2.2815	3.79154	0.000149717	0.00285621	Upregulated	protein_coding
ENSG00000204590.13	749.653	12.1351	2.2342	5.43151	5.58801e-08	8.41873e-06	Upregulated	protein_coding
ENSG00000204592.9	16625.3	10.9275	1.51183	7.22802	4.9007e-13	2.15345e-09	Upregulated	protein_coding
ENSG00000204599.16	251.632	10.658	2.07126	5.14563	2.66622e-07	2.39098e-05	Upregulated	protein_coding
ENSG00000204610.14	61.2639	8.87201	3.14443	2.8215	0.00477998	0.035757	Upregulated	protein_coding
ENSG00000204613.11	3794.01	12.4004	2.50729	4.94573	7.58589e-07	5.12378e-05	Upregulated	protein_coding
ENSG00000204618.10	16.5735	6.92751	1.99291	3.47608	0.000508798	0.00733431	Upregulated	protein_coding
ENSG00000204619.8	182.761	7.53644	1.6462	4.5781	4.69228e-06	0.000212929	Upregulated	protein_coding
ENSG00000204642.14	1540.53	8.1429	1.49818	5.43518	5.47401e-08	8.29438e-06	Upregulated	protein_coding
ENSG00000204644.10	45.8477	21.2516	4.28065	4.96458	6.88483e-07	4.73939e-05	Upregulated	protein_coding
ENSG00000204673.11	774.205	-2.73005	0.963214	-2.83431	0.00459242	0.0348329	Downregulated	protein_coding
ENSG00000204681.11	388.15	10.6152	2.08706	5.08619	3.65335e-07	2.99477e-05	Upregulated	protein_coding
ENSG00000204713.11	524.758	12.2778	2.17941	5.63353	1.76557e-08	3.79547e-06	Upregulated	protein_coding
ENSG00000204767.4	576.128	7.62679	1.37987	5.52718	3.25418e-08	5.75815e-06	Upregulated	protein_coding
ENSG00000204839.9	45.1862	2.78886	1.04245	2.6753	0.00746634	0.0480357	Upregulated	protein_coding
ENSG00000204856.12	196.41	1.43867	0.530884	2.70995	0.00672941	0.0450536	Upregulated	protein_coding
ENSG00000205045.12	2226.35	1.99266	0.710074	2.80628	0.00501177	0.0367145	Upregulated	protein_coding
ENSG00000205238.12	22.0793	7.50162	2.26943	3.3055	0.000948068	0.0115241	Upregulated	protein_coding
ENSG00000205476.9	441.716	2.76899	0.715994	3.86734	0.00011003	0.0022699	Upregulated	protein_coding
ENSG00000205482.11	57.3998	2.19459	0.671279	3.26927	0.00107827	0.0125957	Upregulated	protein_coding
ENSG00000205531.14	9333	6.67697	1.21739	5.48468	4.14219e-08	6.69992e-06	Upregulated	protein_coding
ENSG00000205544.4	82.529	9.01974	2.08743	4.32099	1.55333e-05	0.000532998	Upregulated	protein_coding
ENSG00000205571.15	69.0735	7.32945	1.91088	3.83564	0.000125238	0.00251861	Upregulated	protein_coding
ENSG00000205572.11	10.4347	6.27705	2.04809	3.06483	0.00217794	0.0207305	Upregulated	protein_coding
ENSG00000205609.13	50.1351	-3.29455	1.03625	-3.17929	0.00147637	0.0156329	Downregulated	protein_coding
ENSG00000205683.12	437.269	-1.9775	0.642578	-3.07746	0.00208776	0.0201253	Downregulated	protein_coding
ENSG00000205702.12	39.2529	6.98862	2.04393	3.41922	0.00062802	0.00850423	Upregulated	protein_coding
ENSG00000205809.11	75.5936	2.98164	1.0837	2.75136	0.00593477	0.0413329	Upregulated	protein_coding
ENSG00000205929.11	10.5546	6.67162	2.29871	2.90233	0.00370402	0.0299928	Upregulated	protein_coding
ENSG00000206052.11	155.424	4.32274	1.35966	3.17928	0.00147642	0.0156329	Upregulated	protein_coding
ENSG00000206127.11	38.67	3.06248	1.00162	3.05752	0.00223175	0.0211503	Upregulated	protein_coding
ENSG00000206503.14	8055.99	3.81426	1.24923	3.0533	0.00226338	0.0213552	Upregulated	protein_coding
ENSG00000206530.11	314.694	1.22971	0.450111	2.73201	0.00629495	0.042995	Upregulated	protein_coding
ENSG00000206557.6	21.0419	7.56133	2.31848	3.26133	0.00110892	0.0128796	Upregulated	protein_coding
ENSG00000212124.2	32.6462	8.25563	1.98462	4.1598	3.18522e-05	0.000900088	Upregulated	protein_coding
ENSG00000212126.3	17.0563	7.46336	2.27225	3.28457	0.00102139	0.0121029	Upregulated	protein_coding
ENSG00000212127.6	47.3844	6.79202	1.92401	3.53014	0.000415336	0.00634434	Upregulated	protein_coding
ENSG00000212128.2	20.8137	7.92324	2.37232	3.33987	0.00083819	0.0105333	Upregulated	protein_coding
ENSG00000212657.2	11.3848	6.50396	2.20355	2.95158	0.00316153	0.0269841	Upregulated	protein_coding
ENSG00000212807.3	28.1012	6.52513	1.74495	3.73944	0.000184433	0.00335351	Upregulated	protein_coding
ENSG00000212864.4	18.6368	-7.28276	1.99542	-3.64974	0.000262503	0.00444501	Downregulated	protein_coding
ENSG00000212907.2	3623.73	-6.13023	1.45982	-4.19931	2.67726e-05	0.000788671	Downregulated	protein_coding
ENSG00000213024.13	784.874	-1.66029	0.560042	-2.96458	0.00303093	0.026269	Downregulated	protein_coding
ENSG00000213186.8	821.172	-1.78989	0.671978	-2.66362	0.00773052	0.0492307	Downregulated	protein_coding
ENSG00000213203.3	389.87	2.39582	0.768393	3.11797	0.00182104	0.0182832	Upregulated	protein_coding
ENSG00000213246.7	58.856	-2.03699	0.656073	-3.10482	0.00190396	0.0188501	Downregulated	protein_coding
ENSG00000213316.10	21.952	6.12399	2.22391	2.7537	0.0058926	0.0412079	Upregulated	protein_coding
ENSG00000213347.11	649.7	-1.96583	0.736726	-2.66833	0.00762297	0.0487416	Downregulated	protein_coding
ENSG00000213398.8	93.4286	-1.61083	0.583138	-2.76235	0.00573865	0.0403551	Downregulated	protein_coding
ENSG00000213588.6	65.1264	9.53656	2.06765	4.61228	3.98278e-06	0.000187846	Upregulated	protein_coding
ENSG00000213619.11	418.935	11.386	2.1115	5.39236	6.95368e-08	9.77605e-06	Upregulated	protein_coding
ENSG00000213625.9	1220.17	-1.27478	0.441363	-2.88827	0.00387369	0.0308338	Downregulated	protein_coding
ENSG00000213654.10	394.33	8.77141	1.65214	5.30912	1.10156e-07	1.32012e-05	Upregulated	protein_coding
ENSG00000213676.13	332.747	8.03904	1.51142	5.31885	1.04424e-07	1.28084e-05	Upregulated	protein_coding
ENSG00000213719.8	2514.44	14.1101	2.65094	5.32268	1.02248e-07	1.27257e-05	Upregulated	protein_coding
ENSG00000213722.10	189.658	10.3316	2.12167	4.86955	1.11854e-06	6.95527e-05	Upregulated	protein_coding
ENSG00000213760.11	7.97773	6.51902	2.07495	3.14177	0.00167932	0.0171743	Upregulated	protein_coding
ENSG00000213859.8	27.5776	7.6958	2.24882	3.42215	0.000621284	0.00845209	Upregulated	protein_coding
ENSG00000213889.11	30.911	2.48487	0.890178	2.79143	0.00524755	0.0379223	Upregulated	protein_coding
ENSG00000213903.9	433.955	7.08247	1.36893	5.17371	2.29489e-07	2.16089e-05	Upregulated	protein_coding
ENSG00000213906.10	58.5837	8.68677	1.81057	4.7978	1.6042e-06	9.41974e-05	Upregulated	protein_coding
ENSG00000213923.13	531.294	-2.26901	0.841058	-2.6978	0.00697987	0.0459897	Downregulated	protein_coding
ENSG00000213928.10	422.024	5.60873	1.15164	4.87021	1.11477e-06	6.94822e-05	Upregulated	protein_coding
ENSG00000213934.9	855.1	4.73477	1.28648	3.68041	0.00023286	0.00405506	Upregulated	protein_coding
ENSG00000213977.8	28.4085	-5.17507	1.53858	-3.36353	0.000769518	0.00987722	Downregulated	protein_coding
ENSG00000214022.12	1035.9	-2.77192	0.830601	-3.33724	0.000846138	0.0105827	Downregulated	protein_coding
ENSG00000214026.11	400.826	11.4423	2.18485	5.2371	1.63121e-07	1.71342e-05	Upregulated	protein_coding
ENSG00000214290.9	7.45106	6.19812	2.23776	2.76978	0.00560939	0.0397665	Upregulated	protein_coding
ENSG00000214376.6	18.1676	6.45658	2.31829	2.78506	0.00535182	0.0385012	Upregulated	protein_coding
ENSG00000214517.10	2206.76	-2.27457	0.747206	-3.0441	0.00233374	0.0217571	Downregulated	protein_coding
ENSG00000214655.11	1772.69	-1.57353	0.538218	-2.92358	0.0034603	0.0286349	Downregulated	protein_coding
ENSG00000214872.9	29.3057	7.23397	2.00729	3.60384	0.000313546	0.00507637	Upregulated	protein_coding
ENSG00000214941.8	191.449	1.45619	0.444787	3.27391	0.00106072	0.0124348	Upregulated	protein_coding
ENSG00000214954.9	67.8699	1.47501	0.547227	2.69544	0.00702965	0.0462417	Upregulated	protein_coding
ENSG00000214967.6	12.4141	-3.88018	1.3131	-2.95497	0.00312699	0.0268108	Downregulated	protein_coding
ENSG00000215041.10	302.306	11.1606	2.06988	5.39192	6.97098e-08	9.77605e-06	Upregulated	protein_coding
ENSG00000215817.9	41.8687	-3.25875	0.917438	-3.55201	0.000382296	0.00591852	Downregulated	protein_coding
ENSG00000215912.13	22.7627	4.18595	1.54247	2.71379	0.00665183	0.0446589	Upregulated	protein_coding
ENSG00000216937.14	1790.39	2.21906	0.571593	3.88224	0.000103498	0.00217256	Upregulated	protein_coding
ENSG00000217930.8	69.7811	4.48556	1.21103	3.70391	0.000212301	0.00376566	Upregulated	protein_coding
ENSG00000219481.11	360.455	4.63906	1.01423	4.57396	4.7858e-06	0.000216428	Upregulated	protein_coding
ENSG00000220205.10	630.032	-2.49138	0.773334	-3.22161	0.00127474	0.0141928	Downregulated	protein_coding
ENSG00000221843.6	22.1141	7.53381	2.53829	2.96807	0.00299678	0.0260845	Upregulated	protein_coding
ENSG00000221970.4	27.8293	8.38843	2.20122	3.81081	0.000138511	0.00270506	Upregulated	protein_coding
ENSG00000223501.9	585.3	12.1788	2.18703	5.56864	2.5673e-08	5.01384e-06	Upregulated	protein_coding
ENSG00000223609.11	482.639	-3.03239	1.05659	-2.86999	0.00410491	0.0321432	Downregulated	protein_coding
ENSG00000224051.7	149.736	-2.82101	0.964527	-2.92476	0.00344719	0.0285527	Downregulated	protein_coding
ENSG00000224383.8	32.0031	3.92417	0.983946	3.9882	6.65766e-05	0.00156165	Upregulated	protein_coding
ENSG00000224578.5	168.403	-5.34986	1.3506	-3.96111	7.46022e-05	0.00171332	Downregulated	protein_coding
ENSG00000225190.12	823.449	6.35997	1.18273	5.37738	7.55782e-08	1.03782e-05	Upregulated	protein_coding
ENSG00000225526.6	37.7343	5.17181	1.80037	2.87263	0.00407065	0.0319889	Upregulated	protein_coding
ENSG00000225663.8	179.914	10.151	2.11264	4.8049	1.54828e-06	9.19379e-05	Upregulated	protein_coding
ENSG00000225828.2	303.519	-4.81925	1.18151	-4.07889	4.5252e-05	0.00117313	Downregulated	protein_coding
ENSG00000226650.6	6.58145	-5.22862	1.75993	-2.97092	0.00296911	0.0258608	Downregulated	protein_coding
ENSG00000226761.3	23.0656	7.55037	2.47497	3.0507	0.0022831	0.0214824	Upregulated	protein_coding
ENSG00000226979.9	13.3984	7.05367	2.14372	3.29039	0.0010005	0.0119143	Upregulated	protein_coding
ENSG00000227057.10	507.598	12.0319	2.17165	5.54043	3.0173e-08	5.52438e-06	Upregulated	protein_coding
ENSG00000227345.9	1523.14	1.53319	0.544439	2.8161	0.0048611	0.0360602	Upregulated	protein_coding
ENSG00000227500.11	244.226	-3.00557	1.0167	-2.95621	0.0031144	0.0267445	Downregulated	protein_coding
ENSG00000227507.3	869.806	13.0771	2.2381	5.84295	5.1284e-09	1.8522e-06	Upregulated	protein_coding
ENSG00000228278.5	92.0365	5.32208	1.45196	3.66545	0.000246909	0.00424998	Upregulated	protein_coding
ENSG00000228486.11	73.5767	9.01007	2.04054	4.41553	1.00761e-05	0.000387818	Upregulated	protein_coding
ENSG00000229117.9	17743.8	6.12259	1.20009	5.10179	3.36453e-07	2.86148e-05	Upregulated	protein_coding
ENSG00000229894.5	63.038	5.17171	1.48984	3.47133	0.000517893	0.00743291	Upregulated	protein_coding
ENSG00000231389.8	1906.65	13.2682	2.2496	5.89805	3.67821e-09	1.42612e-06	Upregulated	protein_coding
ENSG00000231500.7	16049.6	15.2725	2.66173	5.73781	9.59091e-09	2.67417e-06	Upregulated	protein_coding
ENSG00000231887.9	351.254	2.92046	0.727313	4.01541	5.93421e-05	0.00143274	Upregulated	protein_coding
ENSG00000231925.14	1058.64	8.34603	1.44183	5.78849	7.1023e-09	2.23283e-06	Upregulated	protein_coding
ENSG00000232119.8	422.288	9.18876	1.79815	5.11011	3.21975e-07	2.74721e-05	Upregulated	protein_coding
ENSG00000232629.9	11.5185	6.97139	2.39073	2.91601	0.00354537	0.0291136	Upregulated	protein_coding
ENSG00000232653.9	93.2527	5.52901	1.53244	3.60798	0.000308593	0.00501916	Upregulated	protein_coding
ENSG00000232810.5	64.3225	9.12289	2.05786	4.43319	9.28482e-06	0.000364277	Upregulated	protein_coding
ENSG00000233024.7	64.6231	-3.57096	1.20489	-2.96371	0.00303952	0.0263213	Downregulated	protein_coding
ENSG00000233056.4	42.0117	3.47984	1.27472	2.72989	0.00633562	0.0431284	Upregulated	protein_coding
ENSG00000233436.8	66.2686	8.87449	2.0701	4.28699	1.8111e-05	0.000592429	Upregulated	protein_coding
ENSG00000234127.9	297.044	11.1392	2.10935	5.28089	1.28559e-07	1.46097e-05	Upregulated	protein_coding
ENSG00000234284.7	153.692	1.56196	0.512636	3.04692	0.002312	0.0216463	Upregulated	protein_coding
ENSG00000234289.6	23.6445	-4.12307	1.14931	-3.58744	0.000333941	0.00533921	Downregulated	protein_coding
ENSG00000234511.11	139.925	10.5473	1.99225	5.29417	1.19556e-07	1.39473e-05	Upregulated	protein_coding
ENSG00000234545.8	1036.55	1.40232	0.440904	3.18055	0.00146994	0.0156329	Upregulated	protein_coding
ENSG00000234745.14	11717.6	5.93913	1.12392	5.28431	1.26183e-07	1.44018e-05	Upregulated	protein_coding
ENSG00000235863.4	159.556	10.559	2.13528	4.94501	7.61399e-07	5.12378e-05	Upregulated	protein_coding
ENSG00000236104.3	194.334	10.6599	2.13301	4.99759	5.80499e-07	4.19311e-05	Upregulated	protein_coding
ENSG00000236383.9	39.1331	4.70492	1.66756	2.82144	0.00478092	0.035757	Upregulated	protein_coding
ENSG00000237441.10	684.062	12.5729	2.20501	5.70197	1.18433e-08	2.89119e-06	Upregulated	protein_coding
ENSG00000237541.4	114.855	8.51743	1.97705	4.30815	1.64628e-05	0.000552953	Upregulated	protein_coding
ENSG00000237649.8	334.925	7.48748	1.90447	3.93152	8.44106e-05	0.00186233	Upregulated	protein_coding
ENSG00000238083.10	410.69	2.17653	0.720996	3.01879	0.00253788	0.0231399	Upregulated	protein_coding
ENSG00000238269.9	1211.42	4.18281	0.968886	4.31713	1.58068e-05	0.000539128	Upregulated	protein_coding
ENSG00000239264.9	119.031	-1.72642	0.641088	-2.69296	0.00708216	0.046402	Downregulated	protein_coding
ENSG00000239388.9	70.8959	7.68331	1.89382	4.05703	4.96998e-05	0.00124913	Upregulated	protein_coding
ENSG00000239789.6	75.3544	-2.05089	0.615617	-3.33143	0.000863996	0.0107602	Downregulated	protein_coding
ENSG00000239857.7	163.11	-3.8459	1.05873	-3.63257	0.000280612	0.0046445	Downregulated	protein_coding
ENSG00000239998.7	338.547	7.97335	1.36582	5.83777	5.29043e-09	1.85976e-06	Upregulated	protein_coding
ENSG00000240038.8	427.011	1.77861	0.531353	3.34731	0.000815991	0.0103053	Upregulated	protein_coding
ENSG00000240053.9	48.3906	8.38028	2.04178	4.10441	4.05356e-05	0.00107795	Upregulated	protein_coding
ENSG00000240065.8	636.928	12.3278	2.15545	5.71935	1.06933e-08	2.71085e-06	Upregulated	protein_coding
ENSG00000240694.9	32.8545	7.473	1.89294	3.94782	7.88653e-05	0.00178145	Upregulated	protein_coding
ENSG00000241106.8	111.086	9.54725	2.16297	4.41396	1.01496e-05	0.00039008	Upregulated	protein_coding
ENSG00000241370.6	22.6394	7.28344	2.48514	2.9308	0.00338087	0.02819	Upregulated	protein_coding
ENSG00000241945.8	43.6963	-3.80883	1.32432	-2.87606	0.00402672	0.0317297	Downregulated	protein_coding
ENSG00000242028.8	190.198	-2.25919	0.6784	-3.33018	0.000867902	0.0107986	Downregulated	protein_coding
ENSG00000242574.9	1090.09	7.38351	1.32045	5.59168	2.24886e-08	4.56085e-06	Upregulated	protein_coding
ENSG00000242612.7	59.8289	5.30737	1.67605	3.1666	0.00154233	0.0161555	Upregulated	protein_coding
ENSG00000242950.7	32.6948	6.60916	1.84575	3.58075	0.000342608	0.00543494	Upregulated	protein_coding
ENSG00000243147.8	364.586	1.965	0.737254	2.66529	0.0076921	0.0490809	Upregulated	protein_coding
ENSG00000243649.10	23.2717	7.35544	2.2681	3.243	0.00118279	0.0135084	Upregulated	protein_coding
ENSG00000243678.12	32.0691	-2.86441	1.05962	-2.70324	0.00686678	0.0455339	Downregulated	protein_coding
ENSG00000243896.4	8.30393	6.58103	2.34535	2.80599	0.00501618	0.0367263	Upregulated	protein_coding
ENSG00000244476.3	64.3937	3.54082	1.30023	2.72324	0.0064646	0.0437291	Upregulated	protein_coding
ENSG00000244482.10	207.976	4.68378	1.12039	4.18051	2.90859e-05	0.000839922	Upregulated	protein_coding
ENSG00000244734.4	5245.08	-2.28504	0.847878	-2.69501	0.00703876	0.0462785	Downregulated	protein_coding
ENSG00000247315.4	430.396	-1.31281	0.428631	-3.06281	0.0021927	0.0208552	Downregulated	protein_coding
ENSG00000249115.9	381.226	-1.89474	0.592803	-3.19625	0.00139227	0.015084	Downregulated	protein_coding
ENSG00000249437.8	377.281	4.30889	1.19411	3.60846	0.000308014	0.00501284	Upregulated	protein_coding
ENSG00000250479.9	50.7051	7.02375	2.16273	3.24763	0.00116369	0.013365	Upregulated	protein_coding
ENSG00000251287.9	30.6883	-2.06384	0.776993	-2.65619	0.0079028	0.0499764	Downregulated	protein_coding
ENSG00000253293.6	20.2008	-3.41596	1.03959	-3.28588	0.00101663	0.0120574	Downregulated	protein_coding
ENSG00000253309.7	21.9111	6.38152	1.88617	3.38333	0.000716119	0.00938394	Upregulated	protein_coding
ENSG00000253457.4	20.3538	7.22629	2.00195	3.60962	0.000306649	0.00499678	Upregulated	protein_coding
ENSG00000253649.6	19.9828	6.41845	2.04	3.1463	0.00165348	0.0169891	Upregulated	protein_coding
ENSG00000254093.9	103.042	3.27135	0.83331	3.92573	8.64667e-05	0.00189343	Upregulated	protein_coding
ENSG00000254402.7	18.1022	-22.2405	4.78741	-4.64562	3.39057e-06	0.000167089	Downregulated	protein_coding
ENSG00000254505.11	76.076	7.00779	1.48515	4.71856	2.37516e-06	0.00012885	Upregulated	protein_coding
ENSG00000254598.3	50.3814	-8.80487	2.83065	-3.11055	0.00186741	0.0185719	Downregulated	protein_coding
ENSG00000255274.10	55.9056	3.90177	1.0204	3.82375	0.000131438	0.00260946	Upregulated	protein_coding
ENSG00000255374.3	23.9517	7.60262	2.21848	3.42695	0.000610405	0.00836017	Upregulated	protein_coding
ENSG00000255582.1	13.4936	6.71812	2.2249	3.01952	0.00253177	0.0231291	Upregulated	protein_coding
ENSG00000255837.2	50.0138	7.43188	1.88513	3.94237	8.068e-05	0.0018082	Upregulated	protein_coding
ENSG00000256043.5	310.43	11.42	2.15888	5.28979	1.22454e-07	1.41601e-05	Upregulated	protein_coding
ENSG00000256188.3	136.712	10.2516	1.94628	5.26727	1.38469e-07	1.52843e-05	Upregulated	protein_coding
ENSG00000256269.11	6786.82	-2.44441	0.869039	-2.81277	0.00491166	0.0362429	Downregulated	protein_coding
ENSG00000256436.1	52.6852	9.19622	2.00204	4.59342	4.36045e-06	0.0002024	Upregulated	protein_coding
ENSG00000256537.5	419.74	9.7084	1.78152	5.4495	5.05121e-08	7.83383e-06	Upregulated	protein_coding
ENSG00000256574.8	27.0735	5.81986	1.79805	3.23676	0.00120894	0.0137268	Upregulated	protein_coding
ENSG00000257093.7	1573.8	9.54323	1.53023	6.23647	4.47545e-10	4.53828e-07	Upregulated	protein_coding
ENSG00000257103.9	3336.47	5.25511	1.04297	5.03859	4.68973e-07	3.544e-05	Upregulated	protein_coding
ENSG00000257315.4	87.4035	-4.17946	1.26487	-3.30426	0.000952285	0.0115594	Downregulated	protein_coding
ENSG00000257335.8	2427.04	3.10619	0.980323	3.16854	0.00153205	0.016067	Upregulated	protein_coding
ENSG00000257704.4	83.8287	-3.04393	0.978299	-3.11145	0.00186171	0.0185433	Downregulated	protein_coding
ENSG00000257743.9	63.7449	9.61742	2.05177	4.68738	2.76728e-06	0.000143465	Upregulated	protein_coding
ENSG00000259417.3	11.9079	6.16273	2.04999	3.00622	0.00264521	0.0237781	Upregulated	protein_coding
ENSG00000259823.6	29.2542	6.28629	1.9155	3.28179	0.00103149	0.0121898	Upregulated	protein_coding
ENSG00000260007.3	194.377	2.23655	0.729043	3.06779	0.00215649	0.0205888	Upregulated	protein_coding
ENSG00000260097.3	25.8178	7.57607	2.01241	3.76469	0.000166759	0.00310056	Upregulated	protein_coding
[truncated: 82 more rows]

## Sheet: sTable 5
Supplementary Table 5. Differentially expressed mRNAs in u-BMF compared with Ctrl.
EnsemblID	baseMean	log2FoldChange	lfcSE	stat	pvalue	padj	significance	gene_type
ENSG00000003987.14	68.1519	8.61097	1.88619	4.56528	4.98831e-06	0.000234851	Upregulated	protein_coding
ENSG00000005700.15	1407.1	5.79641	1.22744	4.72236	2.33119e-06	0.000124844	Upregulated	protein_coding
ENSG00000005961.19	728.578	-2.73068	0.819275	-3.33304	0.000859018	0.0122422	Downregulated	protein_coding
ENSG00000006118.15	66.8678	3.87668	1.00377	3.86214	0.000112399	0.00255246	Upregulated	protein_coding
ENSG00000006453.14	57.5487	3.21913	0.865141	3.72093	0.000198494	0.00397667	Upregulated	protein_coding
ENSG00000006530.18	639.642	1.8691	0.497738	3.75519	0.00017321	0.00358733	Upregulated	protein_coding
ENSG00000006831.10	1404.72	7.05641	1.18767	5.94139	2.82623e-09	9.80442e-07	Upregulated	protein_coding
ENSG00000007129.18	198.245	5.61626	1.29823	4.3261	1.51769e-05	0.000553787	Upregulated	protein_coding
ENSG00000007402.12	206.873	3.03346	1.01991	2.97425	0.00293701	0.0305461	Upregulated	protein_coding
ENSG00000007968.7	7846.13	7.91403	1.35221	5.85266	4.83766e-09	1.43309e-06	Upregulated	protein_coding
ENSG00000008226.20	174.624	2.53739	0.560607	4.52614	6.00706e-06	0.000271192	Upregulated	protein_coding
ENSG00000008277.15	196.715	1.42624	0.496188	2.87439	0.00404811	0.0390232	Upregulated	protein_coding
ENSG00000008323.16	45.5826	4.03142	1.16056	3.4737	0.000513341	0.00833388	Upregulated	protein_coding
ENSG00000009724.18	175.745	6.7781	1.40598	4.82092	1.42897e-06	8.70608e-05	Upregulated	protein_coding
ENSG00000011114.15	828.473	5.36025	1.05221	5.0943	3.50036e-07	2.85335e-05	Upregulated	protein_coding
ENSG00000012779.12	2533.7	6.34957	1.33862	4.74337	2.10193e-06	0.000115706	Upregulated	protein_coding
ENSG00000012963.15	509.573	7.66207	1.46079	5.24515	1.56151e-07	1.50803e-05	Upregulated	protein_coding
ENSG00000013275.8	886.097	9.0032	1.43829	6.25964	3.85866e-10	2.65858e-07	Upregulated	protein_coding
ENSG00000013583.10	676.425	-2.32339	0.796783	-2.91597	0.00354586	0.0353447	Downregulated	protein_coding
ENSG00000022556.16	114.934	9.46665	2.01803	4.69103	2.71831e-06	0.000141357	Upregulated	protein_coding
ENSG00000023191.17	1146.67	4.78792	1.34395	3.56257	0.00036724	0.00648078	Upregulated	protein_coding
ENSG00000023228.14	2173.62	5.01419	1.03227	4.85744	1.18912e-06	7.59901e-05	Upregulated	protein_coding
ENSG00000027075.17	4064.16	1.77227	0.582589	3.04206	0.00234968	0.0258122	Upregulated	protein_coding
ENSG00000030066.14	1501.14	3.49653	0.812887	4.30138	1.69741e-05	0.000599897	Upregulated	protein_coding
ENSG00000033122.21	77.0799	3.45305	0.725014	4.76273	1.90988e-06	0.000108288	Upregulated	protein_coding
ENSG00000034053.15	749.673	6.66812	0.961333	6.93633	4.02429e-12	1.00817e-08	Upregulated	protein_coding
ENSG00000034533.12	369.788	1.2041	0.431357	2.79142	0.00524766	0.0475609	Upregulated	protein_coding
ENSG00000036448.10	247.977	6.90588	1.63596	4.22131	2.42891e-05	0.00078671	Upregulated	protein_coding
ENSG00000037637.11	591.896	10.3733	1.95531	5.30521	1.12541e-07	1.18686e-05	Upregulated	protein_coding
ENSG00000041515.16	15.9333	5.40883	1.82355	2.96609	0.00301611	0.0311821	Upregulated	protein_coding
ENSG00000042445.14	187.239	6.5908	1.2272	5.37059	7.84797e-08	9.15539e-06	Upregulated	protein_coding
ENSG00000047365.13	4589.49	1.36818	0.411137	3.32779	0.000875374	0.0123749	Upregulated	protein_coding
ENSG00000048342.18	405.73	5.60474	1.12857	4.96624	6.82629e-07	4.82507e-05	Upregulated	protein_coding
ENSG00000049656.14	1630.83	2.15142	0.703868	3.05657	0.00223888	0.0249986	Upregulated	protein_coding
ENSG00000050327.15	35.5106	3.18273	1.04919	3.03351	0.00241725	0.0263346	Upregulated	protein_coding
ENSG00000053328.9	42.2129	2.64879	0.760154	3.48455	0.000492971	0.00810298	Upregulated	protein_coding
ENSG00000053702.15	81.0848	8.76736	1.86751	4.69467	2.67034e-06	0.000139689	Upregulated	protein_coding
ENSG00000054282.16	684.147	6.04988	1.10448	5.47757	4.31201e-08	6.17859e-06	Upregulated	protein_coding
ENSG00000054392.13	55.1953	7.15771	1.75918	4.06878	4.7259e-05	0.00129117	Upregulated	protein_coding
ENSG00000054654.20	16387.5	1.68223	0.529069	3.17961	0.00147473	0.0183195	Upregulated	protein_coding
ENSG00000055070.17	594.869	4.99131	1.42362	3.50606	0.000454787	0.00761783	Upregulated	protein_coding
ENSG00000055332.19	2244.64	-1.29017	0.331461	-3.89237	9.92715e-05	0.00230396	Downregulated	protein_coding
ENSG00000056736.10	36.4757	4.12899	1.11654	3.69801	0.000217298	0.00426269	Upregulated	protein_coding
ENSG00000057704.13	580.829	1.85967	0.47582	3.90834	9.29316e-05	0.00219566	Upregulated	protein_coding
ENSG00000058453.17	327.483	6.20079	1.10383	5.61754	1.93692e-08	3.81097e-06	Upregulated	protein_coding
ENSG00000058600.16	1395.46	6.30506	1.01134	6.23434	4.53688e-10	2.91744e-07	Upregulated	protein_coding
ENSG00000059804.17	5293.68	1.40675	0.427228	3.29273	0.000992195	0.0135681	Upregulated	protein_coding
ENSG00000060069.18	1342.64	1.52222	0.502673	3.02825	0.00245974	0.0266001	Upregulated	protein_coding
ENSG00000063015.21	53.1499	7.1923	1.80393	3.98702	6.69087e-05	0.00169783	Upregulated	protein_coding
ENSG00000064601.21	892.743	-1.72525	0.534177	-3.22972	0.00123909	0.0160692	Downregulated	protein_coding
ENSG00000064932.16	981.111	1.8541	0.642668	2.885	0.00391415	0.038108	Upregulated	protein_coding
ENSG00000065675.16	1317.66	1.6674	0.531906	3.13477	0.00171989	0.0205519	Upregulated	protein_coding
ENSG00000066379.15	235.517	10.5006	2.01635	5.20771	1.91186e-07	1.75631e-05	Upregulated	protein_coding
ENSG00000066405.13	18.7341	6.77346	2.42232	2.79627	0.00516961	0.0470151	Upregulated	protein_coding
ENSG00000068308.15	1033.05	10.1031	1.80226	5.60579	2.0731e-08	3.96067e-06	Upregulated	protein_coding
ENSG00000068323.17	599.664	11.4539	2.10098	5.45169	4.9894e-08	6.67992e-06	Upregulated	protein_coding
ENSG00000068394.11	470.603	11.4747	2.08064	5.51497	3.48838e-08	5.44208e-06	Upregulated	protein_coding
ENSG00000068400.14	854.651	8.07016	1.40518	5.74314	9.2938e-09	2.20749e-06	Upregulated	protein_coding
ENSG00000068903.21	351.179	10.9806	1.99336	5.50862	3.61661e-08	5.51168e-06	Upregulated	protein_coding
ENSG00000069702.11	1104.6	2.68494	0.820995	3.27035	0.00107415	0.0144563	Upregulated	protein_coding
ENSG00000070018.9	172.54	8.0908	1.83977	4.39773	1.09391e-05	0.00044032	Upregulated	protein_coding
ENSG00000070047.13	896.932	4.65599	0.898605	5.18136	2.20278e-07	1.96869e-05	Upregulated	protein_coding
ENSG00000070087.15	71.9857	1.93794	0.592329	3.27173	0.00106892	0.014408	Upregulated	protein_coding
ENSG00000071082.11	16150.1	2.18495	0.689404	3.16934	0.00152788	0.0188148	Upregulated	protein_coding
ENSG00000071894.17	487.21	10.0492	1.95931	5.12896	2.91351e-07	2.43856e-05	Upregulated	protein_coding
ENSG00000072062.16	257.125	3.15841	1.12034	2.81916	0.00481491	0.0446048	Upregulated	protein_coding
ENSG00000072071.17	163.083	5.40471	1.18329	4.56753	4.93516e-06	0.000232765	Upregulated	protein_coding
ENSG00000072315.4	71.3847	8.72603	2.19943	3.9674	7.26613e-05	0.00181757	Upregulated	protein_coding
ENSG00000072818.12	1838.27	9.90557	1.5965	6.20454	5.48572e-10	3.44359e-07	Upregulated	protein_coding
ENSG00000072864.16	1145.26	8.24479	1.31513	6.26918	3.62962e-10	2.65819e-07	Upregulated	protein_coding
ENSG00000073969.19	651.578	5.36161	1.15074	4.65926	3.1735e-06	0.000160594	Upregulated	protein_coding
ENSG00000074621.14	465.644	2.33717	0.734687	3.18118	0.00146676	0.0182669	Upregulated	protein_coding
ENSG00000074660.17	174.791	8.01873	1.69814	4.72208	2.33447e-06	0.000124844	Upregulated	protein_coding
ENSG00000075568.17	1824.43	6.37452	1.50887	4.22471	2.39249e-05	0.000779703	Upregulated	protein_coding
ENSG00000075790.12	29.5154	4.2438	1.308	3.2445	0.00117655	0.0154405	Upregulated	protein_coding
ENSG00000075884.14	4151.37	1.24673	0.41512	3.00331	0.0026706	0.0283	Upregulated	protein_coding
ENSG00000075886.11	9.54208	6.23728	2.13665	2.91918	0.00350955	0.0350502	Upregulated	protein_coding
ENSG00000077092.20	82.147	5.199	1.24821	4.16515	3.11154e-05	0.000950587	Upregulated	protein_coding
ENSG00000077380.16	867.599	8.29206	1.41439	5.86265	4.55529e-09	1.36478e-06	Upregulated	protein_coding
ENSG00000077616.11	40.646	7.84046	1.96214	3.99588	6.44542e-05	0.00165466	Upregulated	protein_coding
ENSG00000077721.17	597.351	6.39843	1.20114	5.32696	9.98723e-08	1.09259e-05	Upregulated	protein_coding
ENSG00000078795.17	60.0355	6.24246	1.67701	3.72236	0.000197366	0.00396198	Upregulated	protein_coding
ENSG00000078902.16	251.008	6.97034	1.30401	5.3453	9.02676e-08	1.01992e-05	Upregulated	protein_coding
ENSG00000079459.14	1905.9	3.38428	1.05846	3.19736	0.00138693	0.0173878	Upregulated	protein_coding
ENSG00000080561.14	71.8161	3.50007	1.19085	2.93912	0.00329141	0.0333727	Upregulated	protein_coding
ENSG00000081052.14	154.991	2.54067	0.657729	3.86279	0.000112102	0.00254871	Upregulated	protein_coding
ENSG00000081181.8	293.128	-3.82264	0.971981	-3.93284	8.39494e-05	0.00202315	Downregulated	protein_coding
ENSG00000081237.21	26329.5	1.93707	0.571015	3.39232	0.000693044	0.010439	Upregulated	protein_coding
ENSG00000081923.15	177.604	4.23002	1.21443	3.48313	0.000495588	0.00812573	Upregulated	protein_coding
ENSG00000083896.13	2444.07	4.70398	1.13436	4.14682	3.37122e-05	0.00101117	Upregulated	protein_coding
ENSG00000084674.15	11.4832	6.23546	2.2491	2.77243	0.00556399	0.049559	Upregulated	protein_coding
ENSG00000085231.14	141.642	9.85477	2.01732	4.88509	1.03383e-06	6.76348e-05	Upregulated	protein_coding
ENSG00000085491.17	577.116	4.23851	1.2662	3.34743	0.000815655	0.0117899	Upregulated	protein_coding
ENSG00000085563.15	536.985	2.43674	0.665917	3.65923	0.000252973	0.00479484	Upregulated	protein_coding
ENSG00000085721.13	806.157	4.82189	0.908794	5.30581	1.12173e-07	1.18686e-05	Upregulated	protein_coding
ENSG00000085733.16	460.706	3.71141	1.22875	3.02047	0.00252379	0.027148	Upregulated	protein_coding
ENSG00000085978.22	1225.01	13.0101	2.39601	5.4299	5.63857e-08	7.2873e-06	Upregulated	protein_coding
ENSG00000086570.13	51.7793	7.03903	1.86274	3.77886	0.00015755	0.00334176	Upregulated	protein_coding
ENSG00000088053.11	60.9087	8.54968	2.01585	4.24123	2.22298e-05	0.000737218	Upregulated	protein_coding
ENSG00000088280.20	77.771	8.74992	1.98217	4.41431	1.01332e-05	0.000416141	Upregulated	protein_coding
ENSG00000088387.22	1584.76	1.41338	0.463349	3.05036	0.00228569	0.0253523	Upregulated	protein_coding
ENSG00000088538.13	59.908	3.75699	1.02536	3.66407	0.000248241	0.00472213	Upregulated	protein_coding
ENSG00000088827.14	291.932	-3.40859	1.04279	-3.26871	0.00108041	0.0145183	Downregulated	protein_coding
ENSG00000089723.10	106.188	7.93489	1.9119	4.15027	3.32087e-05	0.000998343	Upregulated	protein_coding
ENSG00000089737.19	2781.56	7.988	1.21327	6.58385	4.58429e-11	5.98673e-08	Upregulated	protein_coding
ENSG00000090104.12	1073.38	1.38963	0.45871	3.02943	0.00245018	0.0265076	Upregulated	protein_coding
ENSG00000090565.17	304.818	2.36901	0.640186	3.70051	0.000215168	0.00423757	Upregulated	protein_coding
ENSG00000090905.19	1668.77	4.15304	0.844417	4.91823	8.73311e-07	5.88871e-05	Upregulated	protein_coding
ENSG00000091136.15	384.942	2.76308	0.829849	3.32961	0.000869663	0.0123411	Upregulated	protein_coding
ENSG00000091262.17	53.9693	5.07076	1.36371	3.71834	0.000200533	0.00400231	Upregulated	protein_coding
ENSG00000091831.25	169.011	2.04434	0.616701	3.31496	0.00091657	0.0128062	Upregulated	protein_coding
ENSG00000091844.8	29.0062	3.83996	1.34381	2.85753	0.00426959	0.040649	Upregulated	protein_coding
ENSG00000091879.14	95.6651	4.38084	1.20779	3.62715	0.000286566	0.00532063	Upregulated	protein_coding
ENSG00000092010.15	3134.89	8.28416	1.34202	6.17288	6.70552e-10	3.76151e-07	Upregulated	protein_coding
ENSG00000092094.11	653.29	5.65484	1.02996	5.49036	4.01111e-08	5.90798e-06	Upregulated	protein_coding
ENSG00000092098.18	47.2496	5.90194	1.68219	3.50849	0.000450654	0.00755821	Upregulated	protein_coding
ENSG00000092200.13	60.0105	2.39876	0.603632	3.97387	7.0713e-05	0.00177557	Upregulated	protein_coding
ENSG00000092330.19	996.501	6.60102	1.07014	6.16834	6.90112e-10	3.79059e-07	Upregulated	protein_coding
ENSG00000094914.14	236.51	4.70958	1.17029	4.02429	5.71474e-05	0.00150368	Upregulated	protein_coding
ENSG00000095110.9	46.978	7.98078	1.92869	4.13793	3.50459e-05	0.00103125	Upregulated	protein_coding
ENSG00000095303.17	611.499	-1.83334	0.550618	-3.3296	0.000869704	0.0123411	Downregulated	protein_coding
ENSG00000095464.10	13.9553	6.23217	2.04524	3.04716	0.00231011	0.0255265	Upregulated	protein_coding
ENSG00000095794.21	682.516	1.92161	0.60008	3.20226	0.00136356	0.0171878	Upregulated	protein_coding
ENSG00000099834.19	76.9308	9.02812	1.92716	4.68469	2.80386e-06	0.000144665	Upregulated	protein_coding
ENSG00000099849.15	155.733	2.90728	0.802168	3.62427	0.000289775	0.00536135	Upregulated	protein_coding
ENSG00000099937.11	53.41	8.57178	1.96339	4.3658	1.26656e-05	0.000490349	Upregulated	protein_coding
ENSG00000099953.10	23.9363	7.03287	2.11302	3.32835	0.00087361	0.0123566	Upregulated	protein_coding
ENSG00000099956.20	409.499	11.4319	2.00839	5.69209	1.2549e-08	2.69899e-06	Upregulated	protein_coding
ENSG00000099977.16	24.3184	7.10548	1.98376	3.58182	0.000341203	0.00612794	Upregulated	protein_coding
ENSG00000100038.20	147.259	-3.18576	0.990295	-3.21699	0.00129545	0.016596	Downregulated	protein_coding
ENSG00000100196.11	178.084	7.21967	1.44092	5.01046	5.42998e-07	3.98778e-05	Upregulated	protein_coding
ENSG00000100197.23	49.3414	5.97581	1.66927	3.5799	0.000343724	0.00615226	Upregulated	protein_coding
ENSG00000100207.21	1640.65	3.96755	0.766312	5.17746	2.24926e-07	1.97811e-05	Upregulated	protein_coding
ENSG00000100304.13	795.391	-1.7643	0.629075	-2.80459	0.00503812	0.0460987	Downregulated	protein_coding
ENSG00000100320.24	45.1628	4.59653	1.46329	3.14123	0.00168241	0.0201805	Upregulated	protein_coding
ENSG00000100330.16	2534.83	-2.46583	0.744526	-3.31195	0.000926486	0.0128921	Downregulated	protein_coding
ENSG00000100450.13	493.828	3.10096	1.11891	2.77142	0.00558122	0.0496957	Upregulated	protein_coding
ENSG00000100604.13	20.536	6.72566	2.18886	3.07268	0.00212149	0.0241091	Upregulated	protein_coding
ENSG00000100605.17	576.14	2.68661	0.931794	2.88327	0.00393571	0.0382473	Upregulated	protein_coding
ENSG00000100628.12	20.1428	5.50247	1.96507	2.80014	0.00510808	0.0465679	Upregulated	protein_coding
ENSG00000100652.5	212.324	6.96231	1.68319	4.13639	3.52819e-05	0.00103702	Upregulated	protein_coding
ENSG00000100814.19	261.818	8.18678	1.52845	5.35626	8.49616e-08	9.73918e-06	Upregulated	protein_coding
ENSG00000100823.12	656.975	6.53718	1.22636	5.33054	9.79209e-08	1.0757e-05	Upregulated	protein_coding
ENSG00000100897.18	6945.71	6.72114	1.14481	5.87099	4.3321e-09	1.31283e-06	Upregulated	protein_coding
ENSG00000100908.14	62.4762	4.29357	1.27883	3.35743	0.000786712	0.0114395	Upregulated	protein_coding
ENSG00000100918.14	266.803	2.49854	0.73496	3.39957	0.000674928	0.0102267	Upregulated	protein_coding
ENSG00000100926.15	32.6856	7.74142	1.82512	4.2416	2.21936e-05	0.000737218	Upregulated	protein_coding
ENSG00000100938.19	373.911	4.66597	1.08699	4.29255	1.76635e-05	0.00061682	Upregulated	protein_coding
ENSG00000101162.4	1589.52	-2.41047	0.767543	-3.1405	0.00168662	0.0202155	Downregulated	protein_coding
ENSG00000101236.17	1018.61	-1.22043	0.397576	-3.06967	0.00214296	0.0242589	Downregulated	protein_coding
ENSG00000101247.18	364.5	2.30266	0.602971	3.81885	0.000134073	0.00293591	Upregulated	protein_coding
ENSG00000101311.17	22.5342	-4.51677	1.13181	-3.99074	6.58683e-05	0.00168277	Downregulated	protein_coding
ENSG00000101342.10	67.7715	3.61245	1.29731	2.78457	0.0053598	0.0481797	Upregulated	protein_coding
ENSG00000101353.16	28.8745	7.23831	1.88561	3.83872	0.000123677	0.00274829	Upregulated	protein_coding
ENSG00000101363.13	54.1164	5.799	1.65936	3.49472	0.000474555	0.00786401	Upregulated	protein_coding
ENSG00000101405.3	13.5915	6.13964	1.93992	3.16489	0.00155143	0.0190337	Upregulated	protein_coding
ENSG00000101577.11	9703.43	-1.27761	0.448426	-2.84909	0.00438448	0.0414325	Downregulated	protein_coding
ENSG00000101842.14	97.5217	2.33819	0.729226	3.2064	0.00134407	0.0169958	Upregulated	protein_coding
ENSG00000101977.22	36.6711	2.60391	0.819049	3.17919	0.00147685	0.0183317	Upregulated	protein_coding
ENSG00000102057.10	25.4489	6.73665	1.92677	3.49635	0.000471672	0.00782607	Upregulated	protein_coding
ENSG00000102096.10	692.407	11.9427	2.10971	5.66084	1.50635e-08	3.05499e-06	Upregulated	protein_coding
ENSG00000102100.16	114.138	9.38199	1.97321	4.75469	1.98755e-06	0.00011102	Upregulated	protein_coding
ENSG00000102103.18	347.799	11.1272	1.99553	5.57607	2.46018e-08	4.32418e-06	Upregulated	protein_coding
ENSG00000102805.16	756.836	1.83086	0.533146	3.43406	0.000594604	0.00928166	Upregulated	protein_coding
ENSG00000102934.10	52.9768	2.23471	0.731798	3.05373	0.00226013	0.0251428	Upregulated	protein_coding
ENSG00000103067.14	93.8149	5.60498	1.4646	3.82698	0.000129727	0.00285021	Upregulated	protein_coding
ENSG00000103121.9	316.009	8.63345	1.72274	5.01147	5.40153e-07	3.97797e-05	Upregulated	protein_coding
ENSG00000103222.20	780.22	2.0463	0.650399	3.14623	0.00165391	0.0199658	Upregulated	protein_coding
ENSG00000103226.19	88.3074	5.37785	1.25007	4.30203	1.6924e-05	0.000598928	Upregulated	protein_coding
ENSG00000103316.12	23.8572	6.50515	2.00209	3.24918	0.00115739	0.015242	Upregulated	protein_coding
ENSG00000103319.12	348.05	4.05374	0.937401	4.32445	1.52913e-05	0.000554548	Upregulated	protein_coding
ENSG00000103415.12	344.598	10.832	1.9745	5.48593	4.11297e-08	5.96699e-06	Upregulated	protein_coding
ENSG00000103423.14	502.352	11.6583	2.00028	5.82831	5.59926e-09	1.61381e-06	Upregulated	protein_coding
ENSG00000103429.11	395.741	7.46891	1.2311	6.06684	1.30452e-09	5.73227e-07	Upregulated	protein_coding
ENSG00000103489.12	618.326	5.08471	1.12384	4.5244	6.05684e-06	0.000272972	Upregulated	protein_coding
ENSG00000103495.15	2130.97	-3.34568	1.06203	-3.15027	0.0016312	0.0197914	Downregulated	protein_coding
ENSG00000103512.16	242.068	2.64688	0.89822	2.94681	0.00321072	0.0327342	Upregulated	protein_coding
ENSG00000104059.5	21.7107	6.71162	2.10098	3.19451	0.00140066	0.0175213	Upregulated	protein_coding
ENSG00000104067.17	28.6573	7.57914	2.0248	3.74316	0.000181724	0.00373142	Upregulated	protein_coding
ENSG00000104324.16	681.647	1.30113	0.404747	3.21466	0.00130598	0.0167065	Upregulated	protein_coding
ENSG00000104327.7	51.3461	7.20563	2.22469	3.23894	0.00119976	0.0156903	Upregulated	protein_coding
ENSG00000104368.19	33.7538	2.82157	0.947903	2.97664	0.00291425	0.0303333	Upregulated	protein_coding
ENSG00000104518.11	952.265	8.04717	1.25695	6.40215	1.53206e-10	1.39285e-07	Upregulated	protein_coding
ENSG00000104522.16	3889.23	6.8275	1.30787	5.22031	1.78627e-07	1.67004e-05	Upregulated	protein_coding
ENSG00000104524.14	55.1144	6.11633	1.60456	3.81183	0.00013794	0.00300314	Upregulated	protein_coding
ENSG00000104529.19	2028.13	3.67369	1.15559	3.17906	0.00147752	0.0183317	Upregulated	protein_coding
ENSG00000104626.15	687.011	3.80897	1.17187	3.25033	0.00115273	0.0151958	Upregulated	protein_coding
ENSG00000104643.10	508.927	4.90003	1.06068	4.61971	3.8427e-06	0.000187964	Upregulated	protein_coding
ENSG00000104728.16	12.413	6.16169	2.16991	2.83961	0.00451694	0.042456	Upregulated	protein_coding
ENSG00000104823.9	228.296	10.346	2.05149	5.04319	4.57834e-07	3.49878e-05	Upregulated	protein_coding
ENSG00000104824.18	2004.11	11.0253	2.13956	5.15307	2.56263e-07	2.18653e-05	Upregulated	protein_coding
ENSG00000104825.17	192.841	7.34764	1.52984	4.80288	1.56399e-06	9.30806e-05	Upregulated	protein_coding
ENSG00000104835.15	43.4832	8.10701	1.94882	4.15996	3.18307e-05	0.000968122	Upregulated	protein_coding
ENSG00000104972.16	214.231	2.94185	0.945632	3.11098	0.00186465	0.0218204	Upregulated	protein_coding
ENSG00000104974.12	155.174	7.99983	1.90693	4.19512	2.72722e-05	0.000858034	Upregulated	protein_coding
ENSG00000104998.4	422.187	9.68707	1.99988	4.84382	1.27367e-06	7.93864e-05	Upregulated	protein_coding
ENSG00000105011.9	90.2152	5.21479	1.12433	4.63813	3.51578e-06	0.000175224	Upregulated	protein_coding
ENSG00000105185.12	392.787	1.68314	0.593528	2.83583	0.00457071	0.0428545	Upregulated	protein_coding
ENSG00000105202.9	558.476	9.55461	1.67401	5.70763	1.14562e-08	2.55969e-06	Upregulated	protein_coding
ENSG00000105251.11	10.6086	-3.16477	1.12871	-2.80388	0.0050491	0.0461604	Downregulated	protein_coding
ENSG00000105289.15	47.2674	3.95095	0.971879	4.06527	4.79772e-05	0.0013027	Upregulated	protein_coding
ENSG00000105327.18	257.735	-1.50446	0.519061	-2.89843	0.00375033	0.0369359	Downregulated	protein_coding
ENSG00000105617.4	98.3932	7.74177	1.89646	4.08221	4.46089e-05	0.00123932	Upregulated	protein_coding
ENSG00000105618.14	315.825	4.74468	0.924432	5.13253	2.85867e-07	2.40795e-05	Upregulated	protein_coding
ENSG00000105619.14	76.4873	7.41846	1.74836	4.24311	2.20448e-05	0.000733853	Upregulated	protein_coding
ENSG00000105750.15	140.867	9.70778	1.93424	5.01892	5.19632e-07	3.87008e-05	Upregulated	protein_coding
ENSG00000105784.16	31.2754	4.92336	1.40803	3.49664	0.000471164	0.00782256	Upregulated	protein_coding
ENSG00000105856.14	2840.38	4.92652	1.12983	4.3604	1.29827e-05	0.000500423	Upregulated	protein_coding
ENSG00000105865.11	59.9634	5.75501	1.49091	3.86006	0.00011336	0.00256869	Upregulated	protein_coding
ENSG00000106028.11	1078.37	4.22926	0.867721	4.87399	1.09368e-06	7.09768e-05	Upregulated	protein_coding
ENSG00000106070.20	487.854	-1.75647	0.587408	-2.99021	0.00278785	0.0293069	Downregulated	protein_coding
ENSG00000106123.12	162.373	2.21033	0.66909	3.30349	0.000954886	0.0132099	Upregulated	protein_coding
ENSG00000106211.10	201.496	-3.30179	1.025	-3.22126	0.00127626	0.016422	Downregulated	protein_coding
ENSG00000106624.11	516.109	-3.05885	0.995703	-3.07205	0.00212593	0.0241492	Downregulated	protein_coding
ENSG00000106714.18	65.0738	3.84179	0.929141	4.13477	3.55308e-05	0.00104064	Upregulated	protein_coding
ENSG00000106809.11	70.9444	8.86539	2.02495	4.37807	1.19735e-05	0.000470465	Upregulated	protein_coding
ENSG00000106819.13	48.1004	8.06477	1.93098	4.17652	2.96007e-05	0.000917066	Upregulated	protein_coding
ENSG00000106823.13	71.7299	8.87288	2.04621	4.33625	1.44935e-05	0.000538956	Upregulated	protein_coding
ENSG00000107779.15	106.084	2.57735	0.646067	3.98929	6.62724e-05	0.00169139	Upregulated	protein_coding
ENSG00000108244.17	86.573	8.28553	2.01698	4.10789	3.99292e-05	0.00113484	Upregulated	protein_coding
ENSG00000108255.8	25.2277	7.15223	2.09268	3.41773	0.000631451	0.00968734	Upregulated	protein_coding
ENSG00000108370.17	261.681	2.11878	0.72737	2.91294	0.00358044	0.0355952	Upregulated	protein_coding
ENSG00000108379.11	12.8669	6.27424	2.15646	2.90951	0.00361994	0.0358654	Upregulated	protein_coding
ENSG00000108950.12	96.0556	2.65005	0.777127	3.41007	0.000649472	0.00989788	Upregulated	protein_coding
ENSG00000109163.7	41.6636	7.70891	1.99137	3.87116	0.000108319	0.00247044	Upregulated	protein_coding
ENSG00000109452.13	1847.89	2.07463	0.521545	3.97785	6.95424e-05	0.00174951	Upregulated	protein_coding
ENSG00000109536.12	765.605	4.63395	1.3841	3.34799	0.000814008	0.011779	Upregulated	protein_coding
ENSG00000109686.20	126.139	9.93017	2.02382	4.90665	9.26446e-07	6.19943e-05	Upregulated	protein_coding
ENSG00000109771.16	145.965	1.8359	0.545041	3.36836	0.000756168	0.0111439	Upregulated	protein_coding
ENSG00000109919.10	700.26	3.58491	1.18418	3.02733	0.00246723	0.0266483	Upregulated	protein_coding
ENSG00000109920.13	2081.9	4.65888	1.15749	4.02498	5.69792e-05	0.00150076	Upregulated	protein_coding
ENSG00000110172.12	1121.06	5.37838	0.983308	5.46968	4.50854e-08	6.32275e-06	Upregulated	protein_coding
ENSG00000110400.11	394.916	-2.99426	0.538739	-5.55791	2.73016e-08	4.57876e-06	Downregulated	protein_coding
ENSG00000110436.13	75.717	4.41049	1.3793	3.19762	0.00138567	0.0173801	Upregulated	protein_coding
ENSG00000110619.18	772.449	3.52081	1.01303	3.47552	0.000509872	0.00829801	Upregulated	protein_coding
ENSG00000110756.18	728.261	7.16807	1.2193	5.87884	4.13155e-09	1.29677e-06	Upregulated	protein_coding
ENSG00000110768.12	854.303	6.16606	1.12423	5.4847	4.1417e-08	5.96699e-06	Upregulated	protein_coding
ENSG00000111087.10	105.745	3.35883	0.910118	3.69054	0.000223778	0.00437354	Upregulated	protein_coding
ENSG00000111206.13	497.584	-3.14502	0.697724	-4.50754	6.55823e-06	0.000291581	Downregulated	protein_coding
ENSG00000111261.14	118.525	9.41141	1.94608	4.83608	1.32423e-06	8.19598e-05	Upregulated	protein_coding
ENSG00000111266.9	503.924	11.7064	2.09661	5.58348	2.35756e-08	4.23589e-06	Upregulated	protein_coding
ENSG00000111331.14	1069.21	-2.08562	0.596294	-3.49763	0.000469408	0.00779833	Downregulated	protein_coding
ENSG00000111335.14	1152.12	-1.31878	0.46746	-2.82116	0.004785	0.0444213	Downregulated	protein_coding
ENSG00000111644.8	129.455	-2.039	0.562716	-3.6235	0.000290642	0.00537362	Downregulated	protein_coding
ENSG00000111684.11	452.502	-2.68602	0.532027	-5.04864	4.44957e-07	3.41026e-05	Downregulated	protein_coding
ENSG00000111796.4	681.547	3.44168	0.761879	4.51736	6.26146e-06	0.000280288	Upregulated	protein_coding
ENSG00000111843.14	1952.05	8.12852	1.45097	5.60214	2.11719e-08	3.98881e-06	Upregulated	protein_coding
ENSG00000111845.5	314.545	8.49803	1.7641	4.8172	1.45589e-06	8.80379e-05	Upregulated	protein_coding
ENSG00000111846.20	946.095	9.36169	1.6626	5.63077	1.79411e-08	3.58345e-06	Upregulated	protein_coding
ENSG00000112290.13	205.211	-3.3063	0.869379	-3.80306	0.000142919	0.0030911	Downregulated	protein_coding
ENSG00000112309.11	43.0269	5.35728	1.61488	3.31745	0.000908425	0.0127465	Upregulated	protein_coding
ENSG00000112473.19	389.735	11.2986	2.07256	5.45151	4.99441e-08	6.67992e-06	Upregulated	protein_coding
ENSG00000112511.18	564.31	8.07862	1.23018	6.567	5.13384e-11	6.15244e-08	Upregulated	protein_coding
ENSG00000112514.18	272.139	6.26904	1.17444	5.33792	9.40179e-08	1.0415e-05	Upregulated	protein_coding
ENSG00000112584.14	928.687	8.35784	1.33583	6.25668	3.93267e-10	2.65858e-07	Upregulated	protein_coding
ENSG00000112759.19	721.962	-3.37667	0.689168	-4.89963	9.60187e-07	6.39276e-05	Downregulated	protein_coding
ENSG00000112763.17	378.595	6.22787	1.13815	5.47193	4.45153e-08	6.3197e-06	Upregulated	protein_coding
ENSG00000113319.13	710.54	1.98741	0.640205	3.10434	0.00190703	0.0221688	Upregulated	protein_coding
ENSG00000113763.12	79.8985	5.77514	1.47471	3.91611	8.99904e-05	0.00214133	Upregulated	protein_coding
ENSG00000114107.9	835.946	1.55445	0.557709	2.78721	0.00531634	0.047969	Upregulated	protein_coding
ENSG00000114446.5	710.394	1.44369	0.511772	2.82096	0.00478809	0.0444344	Upregulated	protein_coding
ENSG00000114656.13	144.341	2.42369	0.648361	3.73818	0.000185356	0.00378244	Upregulated	protein_coding
ENSG00000114757.19	15.6727	6.15509	2.00772	3.06571	0.00217155	0.0244682	Upregulated	protein_coding
ENSG00000114790.13	27.1176	6.74193	2.09338	3.2206	0.00127925	0.0164524	Upregulated	protein_coding
ENSG00000114933.16	1948.8	5.97234	1.02233	5.84188	5.16142e-09	1.51201e-06	Upregulated	protein_coding
ENSG00000114942.14	7594.63	8.17049	1.16069	7.03932	1.93183e-12	6.3666e-09	Upregulated	protein_coding
ENSG00000115042.10	206.736	3.64447	1.25081	2.9137	0.00357175	0.0355222	Upregulated	protein_coding
ENSG00000115073.8	537.603	11.6864	2.09245	5.58503	2.33667e-08	4.23589e-06	Upregulated	protein_coding
ENSG00000115085.15	2260.16	12.2685	1.8442	6.65246	2.88226e-11	4.74943e-08	Upregulated	protein_coding
ENSG00000115353.11	24.4032	3.45445	1.15055	3.00244	0.00267822	0.0283465	Upregulated	protein_coding
ENSG00000115474.7	83.5198	8.90487	1.98021	4.49694	6.8938e-06	0.000304447	Upregulated	protein_coding
ENSG00000115816.15	1357.98	1.09988	0.384937	2.8573	0.00427267	0.0406528	Upregulated	protein_coding
ENSG00000115840.14	379.038	11.0881	1.88007	5.89767	3.6866e-09	1.18533e-06	Upregulated	protein_coding
ENSG00000116127.20	3894.2	14.4289	2.37537	6.07438	1.24465e-09	5.5619e-07	Upregulated	protein_coding
ENSG00000116194.13	220.969	6.91663	1.53916	4.49377	6.99743e-06	0.000307758	Upregulated	protein_coding
ENSG00000116521.11	192.059	10.1819	2.00595	5.07587	3.8573e-07	3.06318e-05	Upregulated	protein_coding
ENSG00000116574.6	291.494	10.8345	2.08258	5.20247	1.96659e-07	1.79409e-05	Upregulated	protein_coding
ENSG00000116604.19	693.908	12.141	1.97065	6.1609	7.23322e-10	3.81408e-07	Upregulated	protein_coding
ENSG00000117020.19	1250.02	6.3478	1.15166	5.51189	3.5501e-08	5.45841e-06	Upregulated	protein_coding
ENSG00000117115.13	625.214	5.38072	1.16696	4.6109	4.00937e-06	0.000195031	Upregulated	protein_coding
ENSG00000117118.11	1351.31	8.48102	1.524	5.56496	2.62208e-08	4.48904e-06	Upregulated	protein_coding
ENSG00000117143.14	662.005	1.5708	0.506144	3.10345	0.00191275	0.0222255	Upregulated	protein_coding
ENSG00000117318.9	49.2809	6.74247	2.09516	3.21812	0.00129034	0.0165547	Upregulated	protein_coding
ENSG00000117400.18	44.1863	-4.0271	0.672409	-5.98906	2.11053e-09	8.06438e-07	Downregulated	protein_coding
ENSG00000117477.13	15.965	3.79373	1.35616	2.7974	0.00515155	0.0468832	Upregulated	protein_coding
ENSG00000117676.14	1674.73	11.9944	2.08564	5.75093	8.8756e-09	2.16672e-06	Upregulated	protein_coding
ENSG00000117983.17	62.9414	8.79122	1.95646	4.49344	7.00804e-06	0.000307758	Upregulated	protein_coding
ENSG00000118181.11	12752.3	14.5934	2.47765	5.89003	3.86118e-09	1.22651e-06	Upregulated	protein_coding
ENSG00000118298.12	46.6741	6.83928	2.11985	3.2263	0.001254	0.0161909	Upregulated	protein_coding
ENSG00000118412.13	2253.89	7.78185	1.2353	6.29956	2.98493e-10	2.38478e-07	Upregulated	protein_coding
ENSG00000118620.13	800.499	1.40958	0.492681	2.86105	0.0042224	0.0403347	Upregulated	protein_coding
ENSG00000118705.18	1878.44	7.08619	1.21759	5.81985	5.89021e-09	1.63469e-06	Upregulated	protein_coding
ENSG00000118785.15	416.846	3.38694	1.00287	3.37723	0.000732187	0.0108633	Upregulated	protein_coding
ENSG00000118898.16	83.8173	4.9268	1.34267	3.66939	0.000243128	0.00465172	Upregulated	protein_coding
ENSG00000119608.15	51.9876	4.58015	1.38885	3.2978	0.000974438	0.0134157	Upregulated	protein_coding
ENSG00000119632.4	122.341	5.42096	1.33062	4.07399	4.62136e-05	0.00127051	Upregulated	protein_coding
ENSG00000119714.11	96.321	2.69475	0.790551	3.4087	0.000652736	0.00993041	Upregulated	protein_coding
ENSG00000119771.15	144	3.16626	0.751681	4.21224	2.52847e-05	0.000808038	Upregulated	protein_coding
ENSG00000120071.15	3260.64	5.64467	1.01478	5.56244	2.66032e-08	4.49611e-06	Upregulated	protein_coding
ENSG00000120210.8	50.4029	8.42305	1.95254	4.31389	1.60408e-05	0.000574615	Upregulated	protein_coding
ENSG00000120215.10	100.446	9.12387	1.90384	4.79235	1.64836e-06	9.67909e-05	Upregulated	protein_coding
ENSG00000120729.10	9.20297	5.85699	2.11511	2.76912	0.0056208	0.0499132	Upregulated	protein_coding
ENSG00000120738.8	1066.59	-2.89043	1.0125	-2.85475	0.00430706	0.0408915	Downregulated	protein_coding
ENSG00000120885.22	280.151	-2.43691	0.802916	-3.03507	0.00240476	0.0262451	Downregulated	protein_coding
ENSG00000121060.19	1655.33	-1.06959	0.336776	-3.17596	0.00149343	0.0184856	Downregulated	protein_coding
ENSG00000121454.6	74.8867	6.37861	1.53521	4.15487	3.25467e-05	0.000982924	Upregulated	protein_coding
ENSG00000121742.19	142.3	3.77733	0.863183	4.37605	1.20848e-05	0.000473702	Upregulated	protein_coding
ENSG00000121764.12	39.662	3.93697	1.39285	2.82656	0.0047051	0.0439165	Upregulated	protein_coding
ENSG00000122026.11	36356.2	4.278	0.963396	4.44054	8.97333e-06	0.000377216	Upregulated	protein_coding
ENSG00000123130.17	780.904	1.23406	0.444977	2.77332	0.00554882	0.0494882	Upregulated	protein_coding
ENSG00000123349.15	115.117	4.32729	0.998767	4.33263	1.47339e-05	0.000544825	Upregulated	protein_coding
ENSG00000123444.14	123.517	6.74818	1.48821	4.53443	5.77599e-06	0.000263467	Upregulated	protein_coding
ENSG00000123500.10	97.3412	3.68386	1.07594	3.42384	0.000617429	0.00956435	Upregulated	protein_coding
ENSG00000123612.16	49.8812	3.61037	1.18675	3.04223	0.00234834	0.0258083	Upregulated	protein_coding
ENSG00000123643.14	1659.12	-1.60158	0.573402	-2.79311	0.00522041	0.047428	Downregulated	protein_coding
ENSG00000124091.10	103.264	9.29373	1.96701	4.7248	2.30346e-06	0.000123688	Upregulated	protein_coding
ENSG00000124134.9	157.55	4.6845	1.50787	3.1067	0.00189191	0.0220514	Upregulated	protein_coding
ENSG00000124251.11	47.0431	8.24857	1.94484	4.24126	2.2227e-05	0.000737218	Upregulated	protein_coding
ENSG00000125084.13	25.8021	4.39588	1.30216	3.37583	0.000735934	0.0109066	Upregulated	protein_coding
ENSG00000125354.24	1723.84	2.76648	0.788445	3.50879	0.000450155	0.00755464	Upregulated	protein_coding
ENSG00000125505.17	254.713	4.8482	1.03292	4.69369	2.68326e-06	0.000139811	Upregulated	protein_coding
ENSG00000125633.11	1751.56	1.10243	0.341302	3.23006	0.00123766	0.0160586	Upregulated	protein_coding
ENSG00000125898.13	191.807	-2.52946	0.659151	-3.83746	0.000124315	0.00275425	Downregulated	protein_coding
ENSG00000125944.21	2352.95	9.0759	1.3719	6.61559	3.70085e-11	5.33033e-08	Upregulated	protein_coding
ENSG00000125945.15	152.397	9.67825	1.99243	4.85751	1.18869e-06	7.59901e-05	Upregulated	protein_coding
ENSG00000125966.10	70.9318	4.77702	1.23112	3.88023	0.000104358	0.00240059	Upregulated	protein_coding
ENSG00000126249.8	33.7808	7.46177	2.1098	3.53671	0.000405142	0.00699736	Upregulated	protein_coding
ENSG00000126261.13	2541.31	7.73448	1.35452	5.71013	1.12888e-08	2.55969e-06	Upregulated	protein_coding
ENSG00000126583.12	29.5552	-4.68379	1.36845	-3.42269	0.000620047	0.00957116	Downregulated	protein_coding
ENSG00000126709.16	308.93	-2.63908	0.526085	-5.01646	5.26334e-07	3.90896e-05	Downregulated	protein_coding
ENSG00000126768.13	411.192	11.286	2.07981	5.42646	5.74834e-08	7.32781e-06	Upregulated	protein_coding
ENSG00000126821.8	334.162	9.66758	1.99093	4.8558	1.19901e-06	7.59901e-05	Upregulated	protein_coding
ENSG00000126838.10	906.423	12.8065	2.00698	6.38096	1.75982e-10	1.54659e-07	Upregulated	protein_coding
ENSG00000126860.12	818.055	4.08307	0.900124	4.53612	5.72989e-06	0.000261817	Upregulated	protein_coding
ENSG00000126861.5	70.0098	8.67901	1.9963	4.34754	1.37673e-05	0.000521515	Upregulated	protein_coding
ENSG00000126895.16	72.5931	6.19276	1.58977	3.89539	9.80407e-05	0.00228142	Upregulated	protein_coding
ENSG00000127022.16	7108.54	6.68155	1.33429	5.00757	5.51216e-07	4.02571e-05	Upregulated	protein_coding
ENSG00000127083.8	69.0004	8.73539	1.89631	4.60653	4.09453e-06	0.000198442	Upregulated	protein_coding
ENSG00000127554.13	31.8485	7.26473	2.03782	3.56495	0.000363926	0.00643954	Upregulated	protein_coding
ENSG00000127561.16	14.4371	6.73416	2.16716	3.10736	0.00188765	0.0220212	Upregulated	protein_coding
ENSG00000127564.17	298.881	-3.34953	0.778188	-4.30428	1.67533e-05	0.000596087	Downregulated	protein_coding
ENSG00000127838.15	484.846	-1.8281	0.521791	-3.50352	0.000459155	0.00766663	Downregulated	protein_coding
ENSG00000128000.17	619.87	6.57169	1.32914	4.94433	7.64059e-07	5.2734e-05	Upregulated	protein_coding
ENSG00000128011.5	44.9331	4.39138	1.19481	3.67536	0.00023751	0.00456743	Upregulated	protein_coding
ENSG00000128218.8	131.665	-3.5478	1.10873	-3.19989	0.0013748	0.0172768	Downregulated	protein_coding
ENSG00000128284.20	1586.61	1.10025	0.346017	3.17976	0.00147395	0.0183195	Upregulated	protein_coding
ENSG00000128626.12	130.435	9.65146	2.0057	4.81202	1.49413e-06	8.99377e-05	Upregulated	protein_coding
ENSG00000128708.13	1374.66	8.03064	1.28591	6.24512	4.23463e-10	2.79115e-07	Upregulated	protein_coding
ENSG00000128731.18	1893.72	3.13176	0.772821	4.05238	5.06999e-05	0.00136398	Upregulated	protein_coding
ENSG00000128918.15	82.0208	4.09012	1.36661	2.99289	0.00276345	0.0291084	Upregulated	protein_coding
ENSG00000129159.9	39.8823	7.89834	2.10228	3.75704	0.000171936	0.00356375	Upregulated	protein_coding
ENSG00000129244.9	513.62	-3.62475	1.12049	-3.23497	0.00121655	0.0158392	Downregulated	protein_coding
ENSG00000129465.16	123.286	6.58199	1.49365	4.40666	1.04975e-05	0.000425845	Upregulated	protein_coding
ENSG00000129467.14	80.7758	5.84592	1.25202	4.66918	3.02403e-06	0.000154214	Upregulated	protein_coding
ENSG00000129484.14	229.726	4.02982	1.08145	3.72629	0.000194319	0.00391683	Upregulated	protein_coding
ENSG00000129559.13	558.439	7.53667	1.30302	5.784	7.2947e-09	1.81438e-06	Upregulated	protein_coding
ENSG00000129566.13	1549.19	5.66206	1.01518	5.5774	2.44145e-08	4.32006e-06	Upregulated	protein_coding
ENSG00000129993.15	386.922	-2.54891	0.871976	-2.92315	0.00346514	0.0346975	Downregulated	protein_coding
ENSG00000130023.16	498.645	4.51899	1.10065	4.10576	4.02996e-05	0.00114247	Upregulated	protein_coding
ENSG00000130167.14	30.2509	6.34174	1.8836	3.36683	0.000760389	0.0111748	Upregulated	protein_coding
ENSG00000130402.14	1844.92	10.0587	1.60227	6.27776	3.43484e-10	2.65819e-07	Upregulated	protein_coding
ENSG00000130592.17	2451.45	12.4188	2.02148	6.14339	8.07771e-10	4.06335e-07	Upregulated	protein_coding
ENSG00000130595.20	83.9723	9.04406	1.65657	5.45952	4.77431e-08	6.49247e-06	Upregulated	protein_coding
ENSG00000130598.17	42.9172	7.95033	2.00796	3.95941	7.51345e-05	0.00186352	Upregulated	protein_coding
ENSG00000130702.15	345.82	-2.76375	0.90944	-3.03895	0.00237403	0.0260254	Downregulated	protein_coding
ENSG00000130755.13	1757.76	7.47702	0.964316	7.7537	8.925e-15	1.17654e-10	Upregulated	protein_coding
ENSG00000130766.5	155.256	10.0458	2.0277	4.95428	7.25982e-07	5.06363e-05	Upregulated	protein_coding
ENSG00000130770.18	596.047	12.045	2.12035	5.68066	1.34173e-08	2.83852e-06	Upregulated	protein_coding
ENSG00000130772.14	78.4378	7.59402	1.87527	4.04957	5.13122e-05	0.00137764	Upregulated	protein_coding
ENSG00000130956.14	190.166	2.16051	0.600578	3.59739	0.000321431	0.00583644	Upregulated	protein_coding
ENSG00000131018.25	18762.6	1.63449	0.507801	3.21876	0.00128745	0.0165336	Upregulated	protein_coding
ENSG00000131469.15	5621.69	2.56692	0.764208	3.35892	0.000782466	0.0113976	Upregulated	protein_coding
ENSG00000131626.19	770.912	6.65431	1.00669	6.61007	3.84131e-11	5.33033e-08	Upregulated	protein_coding
ENSG00000131686.15	80.1498	5.32866	1.26162	4.22365	2.40376e-05	0.000782411	Upregulated	protein_coding
ENSG00000131969.15	91.4955	4.20272	1.48023	2.83925	0.00452204	0.0424888	Upregulated	protein_coding
ENSG00000132003.10	23.5211	7.13695	2.13476	3.34321	0.000828142	0.0119051	Upregulated	protein_coding
ENSG00000132005.9	107.697	7.77692	1.93188	4.02557	5.68385e-05	0.00149855	Upregulated	protein_coding
ENSG00000132016.12	18.3786	7.24048	2.35801	3.07058	0.00213641	0.0242265	Upregulated	protein_coding
ENSG00000132017.11	245.336	9.19423	1.80457	5.09496	3.48808e-07	2.85335e-05	Upregulated	protein_coding
ENSG00000132024.18	127.902	8.1258	1.92906	4.21231	2.52774e-05	0.000808038	Upregulated	protein_coding
ENSG00000132394.11	92.6138	5.75501	1.1477	5.01437	5.32087e-07	3.94058e-05	Upregulated	protein_coding
ENSG00000132464.13	26.8415	5.85904	1.94676	3.00964	0.00261558	0.0279189	Upregulated	protein_coding
ENSG00000132507.18	1831.06	9.90218	1.70736	5.79972	6.64267e-09	1.74325e-06	Upregulated	protein_coding
ENSG00000132522.16	67.0915	8.80646	1.94947	4.51735	6.26171e-06	0.000280288	Upregulated	protein_coding
ENSG00000132530.17	898.135	-2.063	0.552797	-3.73193	0.000190018	0.00385076	Downregulated	protein_coding
ENSG00000132561.14	68.2703	3.22916	1.11958	2.88426	0.00392332	0.0381832	Upregulated	protein_coding
ENSG00000132849.22	1210.97	1.43596	0.480599	2.98785	0.00280945	0.0294869	Upregulated	protein_coding
ENSG00000132855.5	14.142	6.28275	2.08896	3.00759	0.00263329	0.0280286	Upregulated	protein_coding
ENSG00000132881.12	21.7138	7.01583	2.10456	3.33363	0.000857203	0.0122295	Upregulated	protein_coding
ENSG00000133069.17	22900.4	-2.06285	0.700543	-2.94464	0.00323326	0.0329131	Downregulated	protein_coding
ENSG00000133392.18	162.738	9.77272	2.02099	4.83561	1.3274e-06	8.19598e-05	Upregulated	protein_coding
ENSG00000133393.13	926.37	4.95001	1.16946	4.23272	2.30883e-05	0.000759953	Upregulated	protein_coding
ENSG00000133398.4	203.137	10.4715	2.03708	5.14046	2.74069e-07	2.32342e-05	Upregulated	protein_coding
ENSG00000133460.20	74.221	8.55727	1.97851	4.32511	1.52459e-05	0.000554325	Upregulated	protein_coding
ENSG00000133962.8	48.5058	8.36054	1.90664	4.38496	1.16007e-05	0.000459928	Upregulated	protein_coding
ENSG00000134030.14	73.4656	4.994	1.47197	3.39273	0.000691992	0.0104313	Upregulated	protein_coding
ENSG00000134056.12	327.938	4.33834	0.997409	4.34961	1.3638e-05	0.000518107	Upregulated	protein_coding
ENSG00000134058.12	388.58	5.54919	1.095	5.06774	4.02569e-07	3.15885e-05	Upregulated	protein_coding
ENSG00000134183.13	75.7754	5.85774	1.37357	4.26459	2.00266e-05	0.000683054	Upregulated	protein_coding
ENSG00000134202.12	106.92	2.47153	0.728476	3.39274	0.000691977	0.0104313	Upregulated	protein_coding
ENSG00000134333.15	2894.83	14.2931	2.37653	6.01425	1.80716e-09	7.30916e-07	Upregulated	protein_coding
ENSG00000134551.13	34.7827	7.61672	1.94554	3.91496	9.04204e-05	0.00214769	Upregulated	protein_coding
ENSG00000134765.10	145.428	4.30248	1.03927	4.1399	3.47461e-05	0.00102662	Upregulated	protein_coding
ENSG00000134962.7	106.525	9.22258	1.92441	4.79242	1.64783e-06	9.67909e-05	Upregulated	protein_coding
ENSG00000134986.14	302.455	-3.52704	0.947106	-3.72402	0.000196079	0.00394326	Downregulated	protein_coding
ENSG00000135069.14	103.988	-2.54634	0.824722	-3.08752	0.00201837	0.0231972	Downregulated	protein_coding
ENSG00000135144.8	537.079	-3.38099	1.05161	-3.21505	0.00130421	0.0167001	Downregulated	protein_coding
ENSG00000135638.14	15.1873	6.50869	2.09643	3.10465	0.00190501	0.0221649	Upregulated	protein_coding
ENSG00000135845.10	5703.54	4.41223	1.37122	3.21774	0.00129205	0.0165685	Upregulated	protein_coding
ENSG00000135914.6	44.4288	6.00992	1.74037	3.45323	0.000553914	0.00881698	Upregulated	protein_coding
ENSG00000135940.7	968.918	12.681	2.39076	5.30417	1.13186e-07	1.18891e-05	Upregulated	protein_coding
ENSG00000135976.21	2063.7	7.3074	1.25993	5.79986	6.63723e-09	1.74325e-06	Upregulated	protein_coding
ENSG00000136111.14	1219.49	1.45653	0.45345	3.21211	0.00131762	0.0167925	Upregulated	protein_coding
ENSG00000136206.5	28.3271	7.02536	1.91746	3.66388	0.000248422	0.00472217	Upregulated	protein_coding
ENSG00000136231.14	269.893	-3.27288	0.901859	-3.62904	0.000284478	0.00529305	Downregulated	protein_coding
ENSG00000136319.12	309.025	6.08341	1.02499	5.93507	2.93719e-09	1.0057e-06	Upregulated	protein_coding
ENSG00000136514.3	52.6101	8.17193	1.93086	4.23226	2.3135e-05	0.000760542	Upregulated	protein_coding
ENSG00000136541.15	424.334	2.07737	0.658847	3.15304	0.00161577	0.0196222	Upregulated	protein_coding
ENSG00000136699.20	492.486	6.271	1.33423	4.70008	2.6006e-06	0.000136312	Upregulated	protein_coding
ENSG00000136932.15	770.935	1.31584	0.398505	3.30195	0.000960158	0.0132676	Upregulated	protein_coding
ENSG00000136997.22	975.029	-1.39453	0.460023	-3.03144	0.00243392	0.0263967	Downregulated	protein_coding
ENSG00000137309.21	1648.2	-3.32571	0.685583	-4.85091	1.22894e-06	7.75143e-05	Downregulated	protein_coding
ENSG00000137310.13	398.952	7.72082	1.15823	6.66604	2.62792e-11	4.619e-08	Upregulated	protein_coding
ENSG00000137312.15	688.339	10.6741	2.02602	5.2685	1.37544e-07	1.37992e-05	Upregulated	protein_coding
ENSG00000137331.12	37.6078	5.66009	1.71815	3.29429	0.000986697	0.0135139	Upregulated	protein_coding
ENSG00000137337.16	313.263	8.36757	1.73882	4.81222	1.49264e-06	8.99377e-05	Upregulated	protein_coding
ENSG00000137343.18	53.513	8.30248	1.92225	4.31915	1.56633e-05	0.00056262	Upregulated	protein_coding
ENSG00000137404.15	43.6408	8.02566	1.95376	4.1078	3.99443e-05	0.00113484	Upregulated	protein_coding
ENSG00000137460.10	4326.85	-2.20386	0.792999	-2.77914	0.00545024	0.0488097	Downregulated	protein_coding
ENSG00000137501.18	1333.01	2.51564	0.748116	3.36263	0.000772032	0.0113062	Upregulated	protein_coding
ENSG00000137642.13	16036.5	1.32718	0.437948	3.03045	0.0024419	0.0264506	Upregulated	protein_coding
ENSG00000137700.19	247.019	5.72988	1.41171	4.05882	4.93223e-05	0.00133373	Upregulated	protein_coding
ENSG00000137760.15	326.282	1.22988	0.41109	2.99176	0.00277378	0.0291939	Upregulated	protein_coding
ENSG00000137809.17	28.205	3.00741	1.08578	2.76982	0.00560877	0.0498399	Upregulated	protein_coding
ENSG00000137857.18	57.1027	5.18148	1.56138	3.31853	0.000904933	0.0127246	Upregulated	protein_coding
ENSG00000138079.14	26.9697	3.85013	1.0683	3.60398	0.000313387	0.00571795	Upregulated	protein_coding
ENSG00000138193.17	155.394	3.85209	0.978668	3.93606	8.28306e-05	0.00200535	Upregulated	protein_coding
ENSG00000138326.21	25019	1.97107	0.698909	2.82021	0.00479921	0.0445218	Upregulated	protein_coding
ENSG00000138378.19	1721.47	3.03716	0.566474	5.36152	8.25256e-08	9.58497e-06	Upregulated	protein_coding
ENSG00000138623.10	289.452	11.0294	2.12068	5.20091	1.9832e-07	1.803e-05	Upregulated	protein_coding
ENSG00000138629.16	1114.1	11.0322	2.07175	5.32505	1.00924e-07	1.09916e-05	Upregulated	protein_coding
ENSG00000139116.19	221.128	3.14258	0.804845	3.90457	9.4392e-05	0.00221607	Upregulated	protein_coding
ENSG00000139146.14	763.5	6.46006	1.12558	5.73931	9.50658e-09	2.23787e-06	Upregulated	protein_coding
ENSG00000139178.12	295.179	6.85452	1.31723	5.20372	1.95337e-07	1.78822e-05	Upregulated	protein_coding
ENSG00000139182.15	290.564	5.02545	1.13922	4.4113	1.0275e-05	0.000421309	Upregulated	protein_coding
ENSG00000139187.10	488.01	2.1037	0.615015	3.42057	0.000624912	0.00962337	Upregulated	protein_coding
ENSG00000139194.8	32.6935	7.60123	1.92408	3.95058	7.7962e-05	0.001921	Upregulated	protein_coding
ENSG00000139197.11	275.654	5.53139	1.18791	4.65641	3.21771e-06	0.000162519	Upregulated	protein_coding
ENSG00000139351.15	53.7133	4.18263	0.920833	4.54222	5.56639e-06	0.000256017	Upregulated	protein_coding
ENSG00000139537.11	91.7719	4.2613	0.951224	4.4798	7.47114e-06	0.000322912	Upregulated	protein_coding
ENSG00000139625.13	390.424	1.66218	0.574044	2.89557	0.00378473	0.0371914	Upregulated	protein_coding
ENSG00000139714.12	68.0737	3.03374	0.887309	3.41904	0.000628434	0.00966327	Upregulated	protein_coding
ENSG00000139780.8	16.1438	6.2837	2.24199	2.80274	0.00506706	0.0462975	Upregulated	protein_coding
ENSG00000139908.15	111.416	9.52391	1.98777	4.79126	1.65734e-06	9.71015e-05	Upregulated	protein_coding
ENSG00000139914.7	50.1078	6.83276	1.85339	3.68663	0.000227243	0.00442812	Upregulated	protein_coding
ENSG00000139988.10	13.6394	6.42343	2.15015	2.98743	0.00281337	0.0295164	Upregulated	protein_coding
ENSG00000140157.16	613.025	3.30602	0.909389	3.63543	0.000277516	0.00519652	Upregulated	protein_coding
ENSG00000140263.15	251.933	-1.40016	0.494058	-2.834	0.00459695	0.0430393	Downregulated	protein_coding
ENSG00000140522.12	29.3254	7.68599	1.85664	4.13972	3.47724e-05	0.00102662	Upregulated	protein_coding
ENSG00000140694.18	2335.77	9.63971	1.23309	7.81755	5.3863e-15	1.17654e-10	Upregulated	protein_coding
ENSG00000140740.11	2670.08	3.81434	1.08706	3.50887	0.000450016	0.00755464	Upregulated	protein_coding
ENSG00000140743.8	744.677	7.82456	1.34933	5.79883	6.67811e-09	1.74325e-06	Upregulated	protein_coding
ENSG00000140749.9	675.429	6.17258	1.30887	4.71595	2.40587e-06	0.000127628	Upregulated	protein_coding
ENSG00000140750.17	637.299	2.94682	0.988865	2.98	0.00288248	0.0300382	Upregulated	protein_coding
ENSG00000140832.11	15.0441	6.74603	2.10226	3.20893	0.00133228	0.0169074	Upregulated	protein_coding
ENSG00000140905.11	14.2851	6.63376	1.95699	3.38978	0.000699483	0.0104962	Upregulated	protein_coding
ENSG00000140988.16	15828.4	7.88022	1.28308	6.14162	8.1683e-10	4.06335e-07	Upregulated	protein_coding
ENSG00000140990.15	478.438	11.6473	2.09272	5.56564	2.61195e-08	4.48904e-06	Upregulated	protein_coding
ENSG00000141179.14	8859.27	2.7175	0.795625	3.41555	0.000636528	0.00974569	Upregulated	protein_coding
ENSG00000141252.21	1155.02	4.61429	1.04293	4.42437	9.67246e-06	0.000399709	Upregulated	protein_coding
ENSG00000141404.17	73.7771	2.29407	0.5707	4.01975	5.82594e-05	0.00152641	Upregulated	protein_coding
ENSG00000141449.16	116.939	6.69553	1.59383	4.20091	2.65847e-05	0.000840413	Upregulated	protein_coding
ENSG00000141527.19	31.7837	7.61369	1.95507	3.89432	9.84729e-05	0.00228945	Upregulated	protein_coding
ENSG00000141543.12	1140.3	11.4473	2.08603	5.48759	4.07443e-08	5.96699e-06	Upregulated	protein_coding
ENSG00000141579.7	29.5711	7.58222	2.12528	3.56764	0.000360208	0.00639953	Upregulated	protein_coding
ENSG00000141698.17	124.924	1.65774	0.549655	3.01597	0.00256162	0.0274946	Upregulated	protein_coding
ENSG00000141854.10	13.2337	6.03601	2.03719	2.9629	0.00304751	0.0313858	Upregulated	protein_coding
ENSG00000141858.12	120.85	4.93226	1.41326	3.48998	0.000483052	0.00797974	Upregulated	protein_coding
ENSG00000142188.17	630.023	6.46731	1.15314	5.60842	2.04176e-08	3.94729e-06	Upregulated	protein_coding
ENSG00000142513.6	15.3094	6.86245	2.27792	3.01259	0.00259028	0.0277275	Upregulated	protein_coding
ENSG00000142544.7	59.1835	-1.48979	0.514792	-2.89397	0.00380408	0.0373259	Downregulated	protein_coding
ENSG00000142632.17	36.1636	7.70837	1.9876	3.87824	0.000105216	0.0024164	Upregulated	protein_coding
ENSG00000142676.14	20097.6	2.11268	0.708944	2.98003	0.00288216	0.0300382	Upregulated	protein_coding
ENSG00000143365.20	72.159	3.81029	1.18135	3.22536	0.00125812	0.0162361	Upregulated	protein_coding
ENSG00000143412.10	60.6396	3.79965	1.08345	3.50698	0.000453225	0.00759649	Upregulated	protein_coding
ENSG00000143418.20	1327.52	-1.23108	0.436104	-2.82291	0.00475897	0.0442732	Downregulated	protein_coding
ENSG00000143552.10	173.392	3.46336	0.963175	3.59577	0.00032343	0.00585662	Upregulated	protein_coding
ENSG00000143554.14	162.526	5.67216	1.36352	4.15993	3.18346e-05	0.000968122	Upregulated	protein_coding
ENSG00000143614.11	850.423	1.61585	0.534397	3.02368	0.00249716	0.0269055	Upregulated	protein_coding
ENSG00000143624.14	722.176	3.58453	1.15696	3.09823	0.0019468	0.0225417	Upregulated	protein_coding
ENSG00000143627.19	101.985	8.32352	2.21766	3.75329	0.000174529	0.00361182	Upregulated	protein_coding
ENSG00000143702.16	1251.09	6.82577	1.22357	5.57859	2.42482e-08	4.31963e-06	Upregulated	protein_coding
ENSG00000143858.12	44.6378	3.99713	1.2443	3.21236	0.00131649	0.0167925	Upregulated	protein_coding
ENSG00000143869.7	69.5605	2.1659	0.766924	2.82414	0.0047407	0.0441344	Upregulated	protein_coding
ENSG00000143891.17	245.977	1.75031	0.527878	3.31575	0.000913966	0.0127862	Upregulated	protein_coding
ENSG00000143921.9	20.9914	6.80147	1.724	3.94518	7.97398e-05	0.00194842	Upregulated	protein_coding
ENSG00000143924.19	4486.42	1.37777	0.403001	3.41877	0.000629039	0.00966469	Upregulated	protein_coding
ENSG00000143947.15	13440.8	2.49417	0.745453	3.34585	0.000820319	0.0118249	Upregulated	protein_coding
ENSG00000144034.16	323.461	11.0889	1.95387	5.67533	1.38422e-08	2.89642e-06	Upregulated	protein_coding
ENSG00000144048.11	439.438	9.89884	1.8977	5.21624	1.82592e-07	1.69508e-05	Upregulated	protein_coding
ENSG00000144199.12	70.1738	7.46892	1.86272	4.00969	6.07973e-05	0.00158047	Upregulated	protein_coding
ENSG00000144290.17	185.23	4.24452	0.766122	5.54027	3.02011e-08	4.82576e-06	Upregulated	protein_coding
ENSG00000144668.12	228.359	7.15322	1.65573	4.3203	1.5582e-05	0.000561227	Upregulated	protein_coding
ENSG00000144741.19	570.944	5.33621	1.01237	5.271	1.35685e-07	1.37992e-05	Upregulated	protein_coding
ENSG00000144792.9	48.252	8.41145	1.97348	4.26223	2.02395e-05	0.000689424	Upregulated	protein_coding
ENSG00000144891.19	197.534	6.03228	1.38322	4.36103	1.29454e-05	0.000499715	Upregulated	protein_coding
ENSG00000145425.10	19538.4	9.13614	1.34261	6.80475	1.01225e-11	2.05292e-08	Upregulated	protein_coding
ENSG00000145592.14	12125.1	2.36588	0.733287	3.22641	0.00125355	0.0161909	Upregulated	protein_coding
ENSG00000145649.8	465.936	3.0224	0.914918	3.30347	0.000954978	0.0132099	Upregulated	protein_coding
ENSG00000145721.12	68.5997	8.43065	2.23442	3.77308	0.000161246	0.00340099	Upregulated	protein_coding
ENSG00000145730.21	616.057	1.94199	0.492669	3.94178	8.08795e-05	0.00196748	Upregulated	protein_coding
ENSG00000145734.20	3210.6	14.1455	2.13215	6.63436	3.2592e-11	5.05463e-08	Upregulated	protein_coding
ENSG00000145757.16	67.0957	3.83721	1.02756	3.7343	0.000188242	0.00382676	Upregulated	protein_coding
ENSG00000145819.18	3688.66	1.03602	0.318061	3.25729	0.00112482	0.0149024	Upregulated	protein_coding
ENSG00000145975.15	51.9369	6.91066	1.93327	3.5746	0.00035076	0.006247	Upregulated	protein_coding
ENSG00000146006.8	46.6357	2.78625	0.914908	3.04538	0.00232383	0.0256029	Upregulated	protein_coding
ENSG00000146109.5	370.724	4.20565	1.08627	3.87164	0.000108106	0.00247036	Upregulated	protein_coding
ENSG00000146112.12	560.037	11.6432	2.08141	5.59389	2.22036e-08	4.14806e-06	Upregulated	protein_coding
ENSG00000146197.9	74.4521	4.18525	1.05975	3.9493	7.83792e-05	0.00192767	Upregulated	protein_coding
ENSG00000146707.15	49.9176	8.43766	1.88817	4.46869	7.86997e-06	0.000336837	Upregulated	protein_coding
ENSG00000146904.9	131.487	7.71386	1.84817	4.17378	2.99587e-05	0.000925981	Upregulated	protein_coding
ENSG00000147144.13	42.9758	8.1923	1.94107	4.22052	2.43741e-05	0.000788496	Upregulated	protein_coding
ENSG00000147316.15	913.989	2.97146	0.861091	3.45081	0.000558913	0.00886094	Upregulated	protein_coding
ENSG00000147383.11	91.9426	4.14013	1.28975	3.21003	0.00132719	0.0168634	Upregulated	protein_coding
ENSG00000147394.20	198.756	4.97056	1.09546	4.53744	5.69423e-06	0.000260639	Upregulated	protein_coding
ENSG00000147400.10	852.24	10.811	2.05199	5.26852	1.37524e-07	1.37992e-05	Upregulated	protein_coding
ENSG00000147509.14	24.6805	7.30847	2.19977	3.32238	0.000892536	0.0125771	Upregulated	protein_coding
ENSG00000147604.14	24674.6	2.27013	0.700626	3.24014	0.00119471	0.0156397	Upregulated	protein_coding
ENSG00000147684.10	952.281	4.29163	1.30451	3.28983	0.00100249	0.0136804	Upregulated	protein_coding
ENSG00000147687.19	262.557	5.86776	1.13696	5.1609	2.45763e-07	2.14041e-05	Upregulated	protein_coding
ENSG00000147896.4	25.437	6.94127	2.01212	3.44973	0.000561149	0.00889103	Upregulated	protein_coding
ENSG00000148057.16	123.935	1.42889	0.510585	2.79852	0.00513367	0.0467527	Upregulated	protein_coding
ENSG00000148248.14	1324.99	10.9739	1.91366	5.73454	9.77768e-09	2.28131e-06	Upregulated	protein_coding
ENSG00000148290.10	251.44	10.6522	2.03539	5.23351	1.66321e-07	1.58305e-05	Upregulated	protein_coding
ENSG00000148291.10	97.5035	9.29054	1.98754	4.67438	2.94838e-06	0.000150647	Upregulated	protein_coding
ENSG00000148296.7	278.015	7.43132	1.3742	5.40773	6.38301e-08	7.90085e-06	Upregulated	protein_coding
ENSG00000148297.16	325.715	9.54808	1.96584	4.857	1.19176e-06	7.59901e-05	Upregulated	protein_coding
ENSG00000148300.12	234.355	10.5023	2.03564	5.1592	2.48013e-07	2.14867e-05	Upregulated	protein_coding
ENSG00000148303.17	13159.3	4.3827	1.18498	3.69855	0.000216838	0.00426	Upregulated	protein_coding
ENSG00000148826.9	10.0426	5.97054	1.91419	3.1191	0.00181404	0.0213514	Upregulated	protein_coding
ENSG00000148848.15	89.5657	3.87504	0.936986	4.13565	3.53952e-05	0.00103804	Upregulated	protein_coding
ENSG00000149292.17	305.384	1.38076	0.38719	3.5661	0.000362327	0.00641986	Upregulated	protein_coding
ENSG00000149428.21	744.375	7.74438	1.3982	5.53883	3.04504e-08	4.8363e-06	Upregulated	protein_coding
ENSG00000149527.18	239.929	3.76039	0.941176	3.99541	6.4582e-05	0.00165633	Upregulated	protein_coding
ENSG00000149564.12	67.2579	-2.22173	0.684668	-3.24497	0.00117464	0.0154384	Downregulated	protein_coding
ENSG00000149735.7	8.42654	6.27015	1.98536	3.15819	0.0015875	0.0193771	Upregulated	protein_coding
ENSG00000150687.12	190.346	3.20468	0.982528	3.26167	0.00110759	0.014726	Upregulated	protein_coding
ENSG00000151062.15	105.31	5.14675	1.17078	4.39601	1.10257e-05	0.00044111	Upregulated	protein_coding
ENSG00000151065.14	219.696	5.78848	1.10005	5.26201	1.42489e-07	1.40442e-05	Upregulated	protein_coding
ENSG00000151067.23	62.1767	8.30995	1.96469	4.22965	2.34053e-05	0.000768469	Upregulated	protein_coding
ENSG00000151150.22	777.524	1.65465	0.539926	3.06459	0.00217966	0.0245165	Upregulated	protein_coding
ENSG00000151327.14	770.745	1.41266	0.453099	3.11777	0.00182224	0.0214024	Upregulated	protein_coding
ENSG00000151623.15	455.347	2.17879	0.590333	3.69077	0.000223572	0.00437276	Upregulated	protein_coding
ENSG00000151655.19	16.1073	6.55723	2.10803	3.11059	0.00186713	0.0218398	Upregulated	protein_coding
ENSG00000151704.16	54.0042	8.05091	1.89578	4.24674	2.16902e-05	0.000724997	Upregulated	protein_coding
ENSG00000151715.8	40.0934	2.81852	0.929499	3.0323	0.00242695	0.0263644	Upregulated	protein_coding
ENSG00000152082.15	895.823	10.6031	1.99678	5.3101	1.09562e-07	1.16476e-05	Upregulated	protein_coding
ENSG00000152284.5	26.2755	7.50359	2.1195	3.54026	0.000399726	0.00693797	Upregulated	protein_coding
ENSG00000152291.15	3324.32	4.18378	0.896507	4.66676	3.05987e-06	0.00015574	Upregulated	protein_coding
ENSG00000152404.16	1290.23	1.44854	0.471736	3.07065	0.00213596	0.0242265	Upregulated	protein_coding
ENSG00000152894.15	215.759	7.27903	1.50711	4.8298	1.36669e-06	8.41885e-05	Upregulated	protein_coding
ENSG00000152939.17	29.8537	6.06672	1.90982	3.17659	0.0014902	0.0184629	Upregulated	protein_coding
ENSG00000152942.19	987.474	6.34054	1.39193	4.55522	5.23301e-06	0.000244192	Upregulated	protein_coding
ENSG00000152969.21	43.0195	3.6128	1.17914	3.06394	0.00218444	0.0245598	Upregulated	protein_coding
ENSG00000153002.12	200.776	6.18169	1.45507	4.24839	2.15311e-05	0.000721305	Upregulated	protein_coding
ENSG00000153283.13	1824.91	1.76343	0.53579	3.29127	0.000997353	0.0136245	Upregulated	protein_coding
ENSG00000153395.10	987.685	3.33672	0.674	4.95062	7.39766e-07	5.14616e-05	Upregulated	protein_coding
ENSG00000153406.14	242.61	8.89031	1.92007	4.6302	3.65321e-06	0.000180369	Upregulated	protein_coding
ENSG00000153485.6	46.8831	8.01255	1.85027	4.33049	1.48781e-05	0.000547851	Upregulated	protein_coding
ENSG00000153558.17	71.9446	4.74351	1.27189	3.7295	0.000191863	0.00387919	Upregulated	protein_coding
ENSG00000153898.13	255.881	1.96767	0.584387	3.36706	0.000759746	0.0111716	Upregulated	protein_coding
ENSG00000154027.19	317.669	1.83702	0.554861	3.31077	0.000930397	0.0129377	Upregulated	protein_coding
ENSG00000154118.13	20.9214	7.13103	2.26338	3.15061	0.00162932	0.0197777	Upregulated	protein_coding
ENSG00000154146.13	494.753	-4.82392	1.44648	-3.33494	0.000853165	0.0121851	Downregulated	protein_coding
ENSG00000154175.19	44.7233	4.38688	1.21666	3.60567	0.000311353	0.00568478	Upregulated	protein_coding
ENSG00000154265.16	1100.93	1.52964	0.44965	3.40184	0.000669342	0.0101537	Upregulated	protein_coding
ENSG00000154274.15	71.7243	8.92798	1.96373	4.54644	5.45605e-06	0.000251484	Upregulated	protein_coding
ENSG00000154328.16	243.327	3.92602	0.830815	4.72551	2.29543e-06	0.000123508	Upregulated	protein_coding
ENSG00000154359.13	563.302	5.06932	1.16926	4.33549	1.45436e-05	0.000539301	Upregulated	protein_coding
ENSG00000154451.15	2462.34	2.27419	0.607932	3.74086	0.000183389	0.00375684	Upregulated	protein_coding
ENSG00000154814.14	2794.6	1.66362	0.493367	3.37197	0.00074632	0.0110357	Upregulated	protein_coding
ENSG00000154822.18	10229.6	12.238	1.65934	7.37523	1.64063e-13	7.20919e-10	Upregulated	protein_coding
ENSG00000154839.10	331.237	7.5511	1.59718	4.72777	2.27004e-06	0.000122392	Upregulated	protein_coding
ENSG00000155189.12	680.409	8.89193	1.64822	5.39487	6.85719e-08	8.3699e-06	Upregulated	protein_coding
ENSG00000155368.18	572.773	2.11317	0.716499	2.9493	0.0031849	0.0325591	Upregulated	protein_coding
ENSG00000155380.13	2509.23	9.14658	1.47858	6.18605	6.16897e-10	3.72353e-07	Upregulated	protein_coding
ENSG00000156253.7	70.7986	7.16871	1.88572	3.80157	0.000143782	0.00310543	Upregulated	protein_coding
ENSG00000156256.15	1801.51	13.529	2.43015	5.56714	2.58955e-08	4.48904e-06	Upregulated	protein_coding
ENSG00000156261.13	2444.51	12.4335	2.01764	6.1624	7.16494e-10	3.81408e-07	Upregulated	protein_coding
ENSG00000156265.17	472.654	10.2889	1.99659	5.15327	2.55986e-07	2.18653e-05	Upregulated	protein_coding
ENSG00000156467.10	5268.53	2.40783	0.764982	3.14756	0.00164637	0.0199112	Upregulated	protein_coding
ENSG00000156475.19	217.083	3.67386	0.90263	4.07017	4.69782e-05	0.00128617	Upregulated	protein_coding
ENSG00000156650.14	1359.35	9.30551	1.46317	6.35984	2.01962e-10	1.66398e-07	Upregulated	protein_coding
ENSG00000157045.9	2818.78	8.18196	1.43082	5.71836	1.07559e-08	2.48753e-06	Upregulated	protein_coding
ENSG00000157191.20	982.989	7.28522	1.12784	6.45944	1.05088e-10	1.05207e-07	Upregulated	protein_coding
ENSG00000157326.19	69.9669	5.80916	1.48636	3.90832	9.29399e-05	0.00219566	Upregulated	protein_coding
ENSG00000157379.14	188.727	7.15969	1.43974	4.97291	6.59546e-07	4.68705e-05	Upregulated	protein_coding
ENSG00000157870.17	66.058	6.3267	1.52669	4.14407	3.41198e-05	0.00101761	Upregulated	protein_coding
ENSG00000157873.18	749.693	4.24374	1.1492	3.69276	0.000221833	0.00434519	Upregulated	protein_coding
ENSG00000157881.16	323.529	4.37411	1.09211	4.00518	6.19704e-05	0.00160181	Upregulated	protein_coding
ENSG00000157999.6	168.979	5.73584	1.41676	4.04855	5.15364e-05	0.00138226	Upregulated	protein_coding
ENSG00000158874.11	13.2269	6.54746	2.18786	2.99263	0.00276584	0.029122	Upregulated	protein_coding
ENSG00000159128.16	773.477	2.35806	0.734207	3.21172	0.00131945	0.0168055	Upregulated	protein_coding
ENSG00000159314.13	801.412	3.50709	0.815191	4.30217	1.69131e-05	0.000598928	Upregulated	protein_coding
ENSG00000159339.13	1912.95	4.05326	1.17721	3.4431	0.000575092	0.00905753	Upregulated	protein_coding
ENSG00000159363.19	135.929	4.06216	1.30293	3.11772	0.00182257	0.0214024	Upregulated	protein_coding
ENSG00000159403.18	33.0493	6.33568	1.97671	3.20517	0.00134982	0.0170441	Upregulated	protein_coding
ENSG00000159445.13	476.767	1.50616	0.532229	2.82991	0.00465614	0.0435317	Upregulated	protein_coding
ENSG00000159840.16	494.79	4.41084	0.676845	6.51676	7.18406e-11	8.23512e-08	Upregulated	protein_coding
ENSG00000159842.16	853.553	2.12367	0.644777	3.29365	0.000988948	0.0135377	Upregulated	protein_coding
ENSG00000159915.13	63.076	2.91353	0.860289	3.38668	0.000707428	0.0105739	Upregulated	protein_coding
ENSG00000160307.10	75.049	2.85755	0.741416	3.85417	0.000116122	0.00261118	Upregulated	protein_coding
ENSG00000160321.16	63.5645	3.6713	0.892937	4.11149	3.93113e-05	0.00112413	Upregulated	protein_coding
ENSG00000160323.19	20.9955	6.75337	2.10495	3.20832	0.00133512	0.0169233	Upregulated	protein_coding
ENSG00000160325.15	60.4904	8.68847	2.02078	4.29956	1.71136e-05	0.000602404	Upregulated	protein_coding
ENSG00000160326.14	166.883	9.84842	2.02076	4.87363	1.09568e-06	7.09768e-05	Upregulated	protein_coding
ENSG00000160439.16	134.092	9.73767	1.99705	4.87603	1.08243e-06	7.0465e-05	Upregulated	protein_coding
ENSG00000160588.10	497.35	1.55219	0.560586	2.76887	0.00562506	0.0499147	Upregulated	protein_coding
ENSG00000160695.16	1079.49	5.95802	1.24412	4.78895	1.67653e-06	9.77915e-05	Upregulated	protein_coding
ENSG00000160716.6	47.6618	4.55204	1.38078	3.29671	0.000978254	0.0134404	Upregulated	protein_coding
ENSG00000160767.23	27.3073	7.10249	2.07974	3.41508	0.000637627	0.00974608	Upregulated	protein_coding
ENSG00000160932.11	147.079	4.68733	1.32493	3.5378	0.000403471	0.00697762	Upregulated	protein_coding
ENSG00000160948.14	922.801	3.73091	0.905943	4.11826	3.81745e-05	0.00109997	Upregulated	protein_coding
ENSG00000161010.16	333.34	5.47433	1.1597	4.72049	2.35281e-06	0.000125359	Upregulated	protein_coding
ENSG00000161011.20	2355.07	5.68857	1.09208	5.20893	1.89933e-07	1.75091e-05	Upregulated	protein_coding
ENSG00000161013.17	661.168	10.5043	1.94227	5.40828	6.36339e-08	7.90085e-06	Upregulated	protein_coding
ENSG00000161021.13	540.215	7.71262	1.01227	7.61912	2.5541e-14	2.15612e-10	Upregulated	protein_coding
ENSG00000161040.19	296.65	2.18058	0.637017	3.42311	0.000619101	0.00956826	Upregulated	protein_coding
ENSG00000161048.12	489.981	3.19497	0.907985	3.51874	0.000433594	0.00735051	Upregulated	protein_coding
ENSG00000161267.12	155.856	3.85507	1.02107	3.77553	0.000159665	0.00337305	Upregulated	protein_coding
ENSG00000161509.14	37.2401	5.65977	1.90337	2.97356	0.00294369	0.0305663	Upregulated	protein_coding
ENSG00000161905.13	271.549	-2.99051	0.647554	-4.61817	3.87134e-06	0.000189015	Downregulated	protein_coding
ENSG00000161911.12	97.3902	-3.03768	1.02192	-2.97251	0.00295376	0.0306116	Downregulated	protein_coding
ENSG00000161970.15	5471.85	2.63154	0.775015	3.39547	0.000685099	0.010357	Upregulated	protein_coding
ENSG00000162032.16	341.087	-4.33412	1.42126	-3.04949	0.00229228	0.0253931	Downregulated	protein_coding
ENSG00000162073.14	142.317	-3.15771	0.881763	-3.58113	0.000342113	0.00613592	Downregulated	protein_coding
ENSG00000162078.12	16.4372	6.83499	2.13138	3.20684	0.00134202	0.0169781	Upregulated	protein_coding
ENSG00000162298.19	1360.9	-2.36569	0.687578	-3.44061	0.000580401	0.00910308	Downregulated	protein_coding
ENSG00000162365.13	9.14947	6.29029	2.26281	2.77985	0.00543832	0.0487194	Upregulated	protein_coding
ENSG00000162383.13	12.4039	6.58855	2.34772	2.80636	0.00501051	0.0459325	Upregulated	protein_coding
ENSG00000162398.12	25.1854	3.53616	1.24492	2.84048	0.00450456	0.0423548	Upregulated	protein_coding
ENSG00000162415.7	65.726	2.29203	0.776109	2.95323	0.0031447	0.0322231	Upregulated	protein_coding
ENSG00000162552.15	50.7555	7.52042	1.83694	4.09399	4.24012e-05	0.00119053	Upregulated	protein_coding
ENSG00000162594.17	37.0124	3.91011	1.13979	3.43055	0.000602364	0.00938104	Upregulated	protein_coding
ENSG00000162630.6	153.227	6.76491	1.23174	5.49216	3.97053e-08	5.88107e-06	Upregulated	protein_coding
ENSG00000162645.13	2273.86	1.69924	0.573135	2.96481	0.00302865	0.0312526	Upregulated	protein_coding
ENSG00000162714.13	236.574	10.4948	2.04738	5.12597	2.96005e-07	2.46967e-05	Upregulated	protein_coding
ENSG00000162747.13	1985.24	3.00646	1.06308	2.82808	0.00468285	0.0437503	Upregulated	protein_coding
ENSG00000162849.16	32.483	4.4059	1.21111	3.63791	0.00027486	0.00515757	Upregulated	protein_coding
ENSG00000162885.14	260.261	7.78135	1.67883	4.63499	3.5696e-06	0.000177236	Upregulated	protein_coding
ENSG00000162892.16	95.2032	6.12408	1.68901	3.62583	0.000288032	0.00533658	Upregulated	protein_coding
ENSG00000162931.12	28.6246	7.36683	2.05019	3.59325	0.000326578	0.00590552	Upregulated	protein_coding
ENSG00000163001.12	414.686	1.59155	0.52036	3.05856	0.002224	0.024915	Upregulated	protein_coding
ENSG00000163072.16	62.0889	4.64402	1.32316	3.5098	0.000448437	0.00754984	Upregulated	protein_coding
ENSG00000163082.10	73.6118	2.70677	0.701504	3.85852	0.000114077	0.00257523	Upregulated	protein_coding
ENSG00000163145.13	18.7788	6.77796	2.15659	3.14291	0.00167276	0.0201197	Upregulated	protein_coding
ENSG00000163382.13	202.532	10.2428	2.00902	5.09841	3.42519e-07	2.81324e-05	Upregulated	protein_coding
ENSG00000163472.19	67.4895	-1.87347	0.638583	-2.93379	0.00334854	0.0338078	Downregulated	protein_coding
ENSG00000163568.16	146.905	2.06408	0.655391	3.14938	0.00163617	0.0198239	Upregulated	protein_coding
ENSG00000163596.17	388.853	2.06811	0.594487	3.47882	0.000503632	0.00822693	Upregulated	protein_coding
ENSG00000163600.13	388.363	1.7137	0.472432	3.62739	0.000286301	0.00531947	Upregulated	protein_coding
ENSG00000163602.12	1032.31	5.76856	1.07224	5.37991	7.45225e-08	8.89043e-06	Upregulated	protein_coding
ENSG00000163629.13	184.156	2.43323	0.566114	4.29813	1.72248e-05	0.000604701	Upregulated	protein_coding
ENSG00000163632.15	11.3395	5.79379	2.01498	2.87536	0.00403564	0.0389457	Upregulated	protein_coding
ENSG00000163659.13	1465.49	1.12725	0.359768	3.13328	0.00172863	0.020613	Upregulated	protein_coding
ENSG00000163682.17	16590.7	2.42079	0.748509	3.23415	0.00122006	0.0158729	Upregulated	protein_coding
ENSG00000163807.6	663.679	4.83972	1.05925	4.56898	4.90095e-06	0.000231565	Upregulated	protein_coding
ENSG00000163808.17	2088.59	4.3797	1.0257	4.26998	1.95489e-05	0.000673735	Upregulated	protein_coding
ENSG00000163810.13	32.4488	7.23313	1.87569	3.85626	0.000115136	0.0025945	Upregulated	protein_coding
ENSG00000164106.8	25.9137	6.72658	2.34715	2.86585	0.00415891	0.0398436	Upregulated	protein_coding
ENSG00000164182.12	206.672	2.10021	0.566952	3.70439	0.000211898	0.00418166	Upregulated	protein_coding
ENSG00000164220.7	71.6309	7.40819	1.92684	3.84473	0.000120687	0.00269653	Upregulated	protein_coding
ENSG00000164342.14	50.6653	2.06111	0.681425	3.02471	0.00248873	0.0268314	Upregulated	protein_coding
ENSG00000164362.21	38.645	-3.22779	1.06278	-3.03713	0.00238845	0.0261293	Downregulated	protein_coding
ENSG00000164411.12	24.1757	6.95624	1.80225	3.85975	0.000113504	0.00256869	Upregulated	protein_coding
ENSG00000164597.15	1393.84	5.16155	1.01439	5.08831	3.61271e-07	2.91282e-05	Upregulated	protein_coding
ENSG00000164674.17	1046.68	2.55758	0.638208	4.00744	6.13792e-05	0.00158965	Upregulated	protein_coding
ENSG00000164707.16	82.9992	5.42418	1.7272	3.14045	0.00168686	0.0202155	Upregulated	protein_coding
ENSG00000165181.17	159.783	6.33746	1.52039	4.16831	3.0686e-05	0.000942933	Upregulated	protein_coding
ENSG00000165322.18	1341.92	1.18079	0.372098	3.17334	0.00150696	0.0186181	Upregulated	protein_coding
ENSG00000165323.16	137.67	4.07346	0.992703	4.10341	4.07107e-05	0.00115287	Upregulated	protein_coding
ENSG00000165383.12	83.8532	9.0239	2.20099	4.09993	4.13272e-05	0.00116534	Upregulated	protein_coding
ENSG00000165502.7	2777.53	2.73288	0.793626	3.44354	0.000574152	0.00904812	Upregulated	protein_coding
ENSG00000165714.11	457.669	11.6732	1.95713	5.96445	2.45465e-09	9.11506e-07	Upregulated	protein_coding
ENSG00000165716.11	191.26	-3.00002	0.924988	-3.2433	0.00118153	0.0154981	Downregulated	protein_coding
ENSG00000165782.11	563.896	7.28691	1.25047	5.82735	5.63136e-09	1.61381e-06	Upregulated	protein_coding
ENSG00000165923.17	50.8489	8.10881	1.82519	4.44272	8.88289e-06	0.000374294	Upregulated	protein_coding
ENSG00000165929.13	2603.31	4.70294	0.857395	5.48515	4.13126e-08	5.96699e-06	Upregulated	protein_coding
ENSG00000165943.5	1072.43	8.34379	1.4615	5.70907	1.13595e-08	2.55969e-06	Upregulated	protein_coding
ENSG00000165948.11	102.017	7.01574	1.49611	4.68933	2.74106e-06	0.00014226	Upregulated	protein_coding
ENSG00000165949.13	9137.12	9.09445	1.53042	5.94246	2.80784e-09	9.80442e-07	Upregulated	protein_coding
ENSG00000165972.13	18.3913	6.75128	1.94273	3.47515	0.000510565	0.00829905	Upregulated	protein_coding
ENSG00000165995.24	145.162	4.78912	1.10219	4.34509	1.39221e-05	0.000525115	Upregulated	protein_coding
ENSG00000166278.16	42.906	8.10086	1.91178	4.23734	2.26183e-05	0.000748221	Upregulated	protein_coding
ENSG00000166289.6	259.333	2.74111	0.976029	2.80843	0.00497839	0.0457634	Upregulated	protein_coding
ENSG00000166323.13	160.017	2.88893	0.837853	3.44802	0.000564723	0.00894229	Upregulated	protein_coding
ENSG00000166333.14	333.232	-3.56125	1.2516	-2.84536	0.00443609	0.0418453	Downregulated	protein_coding
ENSG00000166359.11	32.996	7.83411	1.93989	4.03843	5.38105e-05	0.00142584	Upregulated	protein_coding
ENSG00000166405.16	278.544	1.74423	0.551781	3.16108	0.00157183	0.0192393	Upregulated	protein_coding
ENSG00000166441.13	12895.3	1.88231	0.591944	3.17987	0.00147342	0.0183195	Upregulated	protein_coding
ENSG00000166451.14	337.169	7.62223	1.52856	4.98655	6.14681e-07	4.38128e-05	Upregulated	protein_coding
ENSG00000166454.10	1256.8	12.8484	2.39773	5.35859	8.3873e-08	9.69873e-06	Upregulated	protein_coding
ENSG00000166546.15	50.4303	7.01716	1.90421	3.68507	0.000228639	0.00444876	Upregulated	protein_coding
ENSG00000166562.9	446.876	1.51863	0.442835	3.42933	0.000605064	0.0094115	Upregulated	protein_coding
ENSG00000166676.17	50.4193	4.40276	1.22007	3.60862	0.000307829	0.00563605	Upregulated	protein_coding
ENSG00000166710.23	62567.2	3.97343	0.967371	4.10745	4.00047e-05	0.00113533	Upregulated	protein_coding
ENSG00000166743.10	102.929	2.99152	0.947937	3.15582	0.00160048	0.0194903	Upregulated	protein_coding
ENSG00000166780.11	75.1032	9.01098	1.90894	4.72042	2.3536e-06	0.000125359	Upregulated	protein_coding
ENSG00000166783.22	6090.45	6.14997	1.16864	5.26249	1.42121e-07	1.40442e-05	Upregulated	protein_coding
ENSG00000166793.13	1679.43	-2.13456	0.683522	-3.12289	0.00179088	0.0211638	Downregulated	protein_coding
ENSG00000166819.12	24.5902	2.39869	0.861316	2.78492	0.00535415	0.0481508	Upregulated	protein_coding
ENSG00000166851.15	414.622	-3.69652	0.917717	-4.02796	5.62639e-05	0.00148637	Downregulated	protein_coding
ENSG00000166896.9	257.811	3.9309	1.29608	3.03292	0.00242199	0.0263541	Upregulated	protein_coding
ENSG00000166912.17	1803.3	2.50241	0.644059	3.88537	0.000102174	0.00236093	Upregulated	protein_coding
ENSG00000166971.17	789.912	1.92631	0.59985	3.21133	0.00132122	0.0168199	Upregulated	protein_coding
ENSG00000167037.19	63.5671	5.18111	1.42699	3.63081	0.000282537	0.00526809	Upregulated	protein_coding
ENSG00000167094.16	172.609	2.46886	0.857966	2.87757	0.0040075	0.0387735	Upregulated	protein_coding
ENSG00000167193.8	700.623	2.2899	0.647812	3.53482	0.000408052	0.00704077	Upregulated	protein_coding
ENSG00000167281.20	21.3486	4.31475	1.36596	3.15877	0.00158434	0.019362	Upregulated	protein_coding
ENSG00000167286.11	983.773	2.37036	0.708539	3.34542	0.000821581	0.0118366	Upregulated	protein_coding
ENSG00000167608.12	21.6417	7.13625	2.09575	3.40511	0.000661385	0.0100446	Upregulated	protein_coding
ENSG00000167613.16	929.444	3.18951	1.06925	2.98295	0.00285481	0.0298324	Upregulated	protein_coding
ENSG00000167633.18	18.8612	6.77072	2.39691	2.82477	0.00473148	0.0440791	Upregulated	protein_coding
ENSG00000167634.12	14.6769	6.65163	2.17815	3.0538	0.00225964	0.0251428	Upregulated	protein_coding
ENSG00000167676.5	160.534	1.70353	0.555747	3.0653	0.00217452	0.0244857	Upregulated	protein_coding
ENSG00000167703.15	559.609	3.59996	0.978051	3.68074	0.000232556	0.00450833	Upregulated	protein_coding
ENSG00000167705.12	1527.2	13.0291	2.47309	5.26835	1.37652e-07	1.37992e-05	Upregulated	protein_coding
ENSG00000167785.9	330.688	10.9259	1.98496	5.50435	3.7053e-08	5.61438e-06	Upregulated	protein_coding
ENSG00000167850.4	63.3683	8.33565	1.97774	4.21475	2.50058e-05	0.000802043	Upregulated	protein_coding
ENSG00000167851.15	533.657	11.6444	2.10173	5.5404	3.01789e-08	4.82576e-06	Upregulated	protein_coding
ENSG00000167962.15	224.255	10.4583	2.03602	5.13663	2.79706e-07	2.36361e-05	Upregulated	protein_coding
ENSG00000167964.13	24.2238	4.31504	1.21919	3.53927	0.000401236	0.00695045	Upregulated	protein_coding
ENSG00000167996.16	9906.04	-3.35432	0.941517	-3.56267	0.000367098	0.00648078	Downregulated	protein_coding
ENSG00000168038.11	690.108	1.03352	0.350836	2.94588	0.00322039	0.0328104	Upregulated	protein_coding
ENSG00000168140.5	125.35	9.84265	2.07767	4.73736	2.16523e-06	0.000118436	Upregulated	protein_coding
ENSG00000168159.15	1070.75	4.35703	1.24969	3.48647	0.000489436	0.00806498	Upregulated	protein_coding
ENSG00000168280.18	159.575	4.42957	0.875555	5.05916	4.21113e-07	3.28481e-05	Upregulated	protein_coding
ENSG00000168386.19	253.799	4.76103	1.12198	4.2434	2.20162e-05	0.000733826	Upregulated	protein_coding
ENSG00000168394.13	1138.08	9.44083	1.68524	5.60207	2.11809e-08	3.98881e-06	Upregulated	protein_coding
ENSG00000168542.17	88.1493	9.30357	2.08721	4.45741	8.29551e-06	0.00035276	Upregulated	protein_coding
ENSG00000168653.11	814.536	2.52983	0.803535	3.14837	0.00164183	0.0198655	Upregulated	protein_coding
ENSG00000168679.18	97.6941	2.77353	0.865267	3.2054	0.00134874	0.0170408	Upregulated	protein_coding
ENSG00000168754.15	120.329	-3.39698	1.17866	-2.88207	0.00395067	0.0383182	Downregulated	protein_coding
ENSG00000168824.15	66.4116	3.26259	0.689641	4.73086	2.23572e-06	0.000121036	Upregulated	protein_coding
ENSG00000168918.14	3812.32	11.2855	1.77051	6.37415	1.83977e-10	1.56469e-07	Upregulated	protein_coding
ENSG00000168961.17	623.596	-2.83347	0.75757	-3.7402	0.000183871	0.0037638	Downregulated	protein_coding
ENSG00000169031.21	83.6544	3.57562	0.744357	4.80363	1.55814e-06	9.29421e-05	Upregulated	protein_coding
ENSG00000169045.19	13741	3.58182	0.819464	4.37094	1.23714e-05	0.000482565	Upregulated	protein_coding
ENSG00000169136.13	189.09	-3.3951	1.0294	-3.29814	0.00097329	0.0134129	Downregulated	protein_coding
ENSG00000169230.10	425.308	-1.20257	0.38944	-3.08796	0.00201537	0.0231799	Downregulated	protein_coding
ENSG00000169282.18	110.66	3.55879	1.01	3.52355	0.0004258	0.00726893	Upregulated	protein_coding
ENSG00000169629.12	224.82	1.38926	0.450058	3.08684	0.00202293	0.0232395	Upregulated	protein_coding
ENSG00000169758.13	29.1185	5.30819	1.58254	3.35423	0.000795867	0.0115609	Upregulated	protein_coding
ENSG00000169918.10	43.7331	4.26128	1.43711	2.96518	0.00302502	0.0312274	Upregulated	protein_coding
ENSG00000169926.11	4089.41	3.11112	0.834355	3.72878	0.000192411	0.00388729	Upregulated	protein_coding
ENSG00000169964.8	96.2586	9.12699	1.89692	4.81148	1.49816e-06	8.99748e-05	Upregulated	protein_coding
ENSG00000169981.11	98.3109	7.04899	1.67881	4.19881	2.68324e-05	0.000846217	Upregulated	protein_coding
ENSG00000170011.14	41.6475	3.16421	0.992435	3.18833	0.00143095	0.0178547	Upregulated	protein_coding
ENSG00000170074.21	215.328	2.26356	0.786988	2.87624	0.00402449	0.038895	Upregulated	protein_coding
ENSG00000170092.15	20.5816	5.64702	1.97438	2.86015	0.00423439	0.0404199	Upregulated	protein_coding
ENSG00000170113.16	249.985	2.92485	0.84535	3.45993	0.000540311	0.00866502	Upregulated	protein_coding
ENSG00000170175.11	108.193	9.27642	1.983	4.67797	2.89733e-06	0.000148326	Upregulated	protein_coding
ENSG00000170236.16	126.864	3.51381	0.894061	3.93017	8.48859e-05	0.00203827	Upregulated	protein_coding
ENSG00000170270.5	107.02	5.53304	1.46184	3.78499	0.000153714	0.00327357	Upregulated	protein_coding
ENSG00000170291.16	156.034	6.51013	1.35709	4.79711	1.60971e-06	9.51569e-05	Upregulated	protein_coding
ENSG00000170296.10	536.111	-2.5702	0.738959	-3.47813	0.000504916	0.00824279	Downregulated	protein_coding
ENSG00000170310.15	468.316	1.22296	0.417885	2.92654	0.00342753	0.034373	Upregulated	protein_coding
ENSG00000170464.10	78.3085	5.29683	1.36188	3.88936	0.000100507	0.00232854	Upregulated	protein_coding
ENSG00000170624.14	38.2075	5.47879	1.8428	2.97308	0.00294832	0.0305764	Upregulated	protein_coding
ENSG00000170807.12	19.8588	7.25378	2.3072	3.14398	0.00166668	0.0200649	Upregulated	protein_coding
ENSG00000170881.5	1423.2	8.75716	1.51342	5.78633	7.19396e-09	1.81438e-06	Upregulated	protein_coding
ENSG00000170889.14	5854.37	12.0817	1.66391	7.26103	3.84148e-13	1.44686e-09	Upregulated	protein_coding
ENSG00000170892.13	290.51	10.8627	1.99175	5.45385	4.92913e-08	6.66444e-06	Upregulated	protein_coding
ENSG00000170906.16	402.235	9.78286	1.92903	5.07137	3.94953e-07	3.10834e-05	Upregulated	protein_coding
ENSG00000170909.14	201.888	2.52379	0.895072	2.81965	0.00480766	0.0445532	Upregulated	protein_coding
ENSG00000171044.11	61.4562	2.30298	0.696364	3.30715	0.000942518	0.0130718	Upregulated	protein_coding
ENSG00000171094.18	27.7902	6.69021	1.98745	3.36623	0.000762033	0.0111928	Upregulated	protein_coding
ENSG00000171155.8	179.331	9.94823	2.01475	4.93769	7.90532e-07	5.44188e-05	Upregulated	protein_coding
ENSG00000171189.18	79.1067	8.813	1.93694	4.54995	5.36575e-06	0.000249503	Upregulated	protein_coding
ENSG00000171217.5	32.96	6.06226	1.77457	3.41619	0.000635051	0.00972871	Upregulated	protein_coding
ENSG00000171298.14	453.803	9.76175	1.99539	4.89216	9.97369e-07	6.59038e-05	Upregulated	protein_coding
ENSG00000171444.19	215.191	1.72022	0.43679	3.93832	8.20526e-05	0.001992	Upregulated	protein_coding
ENSG00000171451.15	68.7974	7.56843	2.03996	3.71009	0.000207186	0.00410711	Upregulated	protein_coding
ENSG00000171617.16	976.032	2.24453	0.640749	3.50298	0.000460079	0.0076772	Upregulated	protein_coding
ENSG00000171817.17	183.582	2.07981	0.559924	3.71445	0.000203648	0.00405563	Upregulated	protein_coding
ENSG00000171819.5	30.1279	7.45848	1.93251	3.85948	0.000113627	0.00256927	Upregulated	protein_coding
ENSG00000171862.15	7443.63	8.0942	1.33733	6.0525	1.42611e-09	6.16385e-07	Upregulated	protein_coding
ENSG00000171877.21	91.4223	7.81	1.8863	4.14037	3.46746e-05	0.00102662	Upregulated	protein_coding
ENSG00000171916.17	16.9779	6.59336	2.03387	3.24178	0.00118784	0.0155653	Upregulated	protein_coding
ENSG00000171962.19	49.1086	2.61699	0.915437	2.85874	0.0042533	0.0405415	Upregulated	protein_coding
ENSG00000172116.23	998.09	2.39928	0.599038	4.00522	6.19601e-05	0.00160181	Upregulated	protein_coding
ENSG00000172139.15	24.0097	6.11819	2.10709	2.90363	0.0036887	0.0364378	Upregulated	protein_coding
ENSG00000172209.6	121.905	9.51602	1.9679	4.83562	1.32728e-06	8.19598e-05	Upregulated	protein_coding
ENSG00000172215.6	246.196	3.93353	0.658955	5.96935	2.38205e-09	8.97184e-07	Upregulated	protein_coding
ENSG00000172232.10	467.184	11.7334	2.64446	4.43699	9.1225e-06	0.00038221	Upregulated	protein_coding
ENSG00000172432.19	2020.65	-1.7415	0.592082	-2.94131	0.00326825	0.0332308	Downregulated	protein_coding
ENSG00000172640.4	10.3139	6.11733	2.16569	2.82466	0.00473309	0.0440791	Upregulated	protein_coding
ENSG00000172673.12	967.041	10.6676	1.97072	5.41307	6.19528e-08	7.77803e-06	Upregulated	protein_coding
ENSG00000172803.18	132.077	3.42376	0.925227	3.70045	0.000215213	0.00423757	Upregulated	protein_coding
ENSG00000172809.13	8223.46	2.3529	0.715331	3.28924	0.00100457	0.0136875	Upregulated	protein_coding
ENSG00000172878.14	78.0279	7.37009	1.86742	3.94667	7.92449e-05	0.00194172	Upregulated	protein_coding
ENSG00000173080.6	68.0498	4.96489	1.39183	3.56717	0.000360863	0.00640683	Upregulated	protein_coding
ENSG00000173124.15	13.4217	5.8116	2.00467	2.89903	0.0037432	0.0368933	Upregulated	protein_coding
ENSG00000173137.12	96.6201	9.23428	1.95028	4.73484	2.19225e-06	0.000119172	Upregulated	protein_coding
ENSG00000173208.4	480.764	2.07808	0.70853	2.93295	0.00335759	0.033839	Upregulated	protein_coding
ENSG00000173258.13	313.347	2.32311	0.672755	3.45312	0.000554133	0.00881698	Upregulated	protein_coding
ENSG00000173273.17	1297.44	3.73178	0.893106	4.17843	2.93533e-05	0.000911541	Upregulated	protein_coding
ENSG00000173281.5	313.228	4.29077	0.915335	4.68765	2.76362e-06	0.000142868	Upregulated	protein_coding
ENSG00000173482.17	320.547	1.90182	0.647292	2.93812	0.00330209	0.0334587	Upregulated	protein_coding
ENSG00000173585.18	104.891	2.02836	0.691518	2.9332	0.00335485	0.0338372	Upregulated	protein_coding
ENSG00000173638.19	248.414	4.67301	1.02415	4.5628	5.04751e-06	0.000236372	Upregulated	protein_coding
ENSG00000173662.21	12.3389	5.7409	1.89363	3.03169	0.00243185	0.0263964	Upregulated	protein_coding
ENSG00000173698.18	19.2705	6.42132	1.95593	3.28299	0.00102712	0.0139659	Upregulated	protein_coding
ENSG00000173801.17	297.716	-2.77469	0.695655	-3.9886	6.6465e-05	0.00169236	Downregulated	protein_coding
ENSG00000174038.13	37.323	7.9583	1.95753	4.06548	4.79346e-05	0.0013027	Upregulated	protein_coding
ENSG00000174059.17	82.0449	-3.4478	1.0569	-3.26217	0.00110563	0.0147073	Downregulated	protein_coding
ENSG00000174225.15	19.0616	6.25594	2.05146	3.0495	0.00229219	0.0253931	Upregulated	protein_coding
ENSG00000174231.18	4902.51	12.7407	1.81455	7.02142	2.19619e-12	6.43363e-09	Upregulated	protein_coding
ENSG00000174282.12	564.847	11.7395	2.10141	5.58647	2.31733e-08	4.23589e-06	Upregulated	protein_coding
ENSG00000174292.13	44.3034	7.88599	2.14804	3.67125	0.000241364	0.00462132	Upregulated	protein_coding
ENSG00000174373.17	2390.2	1.30415	0.383657	3.39927	0.000675656	0.0102319	Upregulated	protein_coding
ENSG00000174482.11	64.7323	2.82472	0.939852	3.0055	0.00265145	0.028165	Upregulated	protein_coding
ENSG00000174500.13	197.958	9.96248	2.07488	4.80148	1.57496e-06	9.33118e-05	Upregulated	protein_coding
ENSG00000174501.15	2690.02	1.03111	0.368479	2.79829	0.00513736	0.0467702	Upregulated	protein_coding
ENSG00000174514.13	70.0875	2.40414	0.767759	3.13138	0.00173989	0.0207192	Upregulated	protein_coding
ENSG00000174527.11	14.275	6.5712	2.09689	3.13378	0.00172573	0.020597	Upregulated	protein_coding
ENSG00000174611.12	90.1688	3.80995	1.08449	3.51313	0.000442861	0.0074655	Upregulated	protein_coding
ENSG00000174672.16	29.2922	7.37581	2.00443	3.67976	0.000233455	0.00451931	Upregulated	protein_coding
ENSG00000174775.18	52.5586	4.02811	1.34344	2.99835	0.00271441	0.0286836	Upregulated	protein_coding
ENSG00000174886.14	171.618	2.30727	0.749409	3.07879	0.00207844	0.0237427	Upregulated	protein_coding
ENSG00000175265.19	684.053	3.58415	0.823191	4.35397	1.33694e-05	0.000511588	Upregulated	protein_coding
ENSG00000175334.8	151.278	-3.03697	0.676006	-4.49251	7.03881e-06	0.000307758	Downregulated	protein_coding
ENSG00000175426.11	13.2634	6.19593	1.91392	3.23731	0.00120664	0.0157724	Upregulated	protein_coding
ENSG00000175806.15	211.425	5.3735	1.091	4.92529	8.42356e-07	5.7239e-05	Upregulated	protein_coding
ENSG00000175899.15	2067.46	3.56966	1.00521	3.55115	0.000383556	0.00672293	Upregulated	protein_coding
ENSG00000176153.13	64.1682	6.14678	1.50945	4.07219	4.65725e-05	0.00127905	Upregulated	protein_coding
ENSG00000176358.16	27.7716	7.21239	1.94756	3.7033	0.00021281	0.00419651	Upregulated	protein_coding
ENSG00000176371.14	119.919	6.42001	1.41787	4.52791	5.95691e-06	0.000269389	Upregulated	protein_coding
ENSG00000176383.9	49.2282	3.59828	1.00158	3.59261	0.000327384	0.00591603	Upregulated	protein_coding
ENSG00000176387.7	17.3408	6.54725	2.00629	3.26336	0.00110098	0.0146766	Upregulated	protein_coding
ENSG00000176444.19	559.376	11.683	2.0168	5.79286	6.9198e-09	1.77369e-06	Upregulated	protein_coding
ENSG00000176454.15	99.2182	4.45956	1.11075	4.0149	5.94718e-05	0.00155245	Upregulated	protein_coding
ENSG00000176563.10	29.3974	7.49461	2.14658	3.49142	0.000480458	0.00795184	Upregulated	protein_coding
ENSG00000176595.4	560.012	11.8581	2.43725	4.86536	1.14247e-06	7.3646e-05	Upregulated	protein_coding
ENSG00000176641.11	448.048	-3.76846	1.1358	-3.3179	0.000906975	0.0127329	Downregulated	protein_coding
ENSG00000176783.15	1131.92	5.8441	1.0504	5.56367	2.64157e-08	4.49322e-06	Upregulated	protein_coding
ENSG00000176845.13	1014.98	4.01932	0.927017	4.33576	1.4526e-05	0.000539301	Upregulated	protein_coding
ENSG00000176974.21	187.539	4.02044	1.10602	3.63504	0.000277934	0.00520066	Upregulated	protein_coding
ENSG00000176994.11	1101.62	7.64702	1.21905	6.27292	3.5433e-10	2.65819e-07	Upregulated	protein_coding
ENSG00000177082.13	162.141	6.01019	1.26574	4.74835	2.05086e-06	0.000113594	Upregulated	protein_coding
ENSG00000177302.15	662.223	4.59685	1.06908	4.29984	1.70923e-05	0.000602404	Upregulated	protein_coding
ENSG00000177311.12	1230.7	1.75873	0.592008	2.97079	0.00297038	0.0307596	Upregulated	protein_coding
ENSG00000177370.5	199.087	10.3247	2.01239	5.13058	2.88854e-07	2.42536e-05	Upregulated	protein_coding
ENSG00000177427.13	87.4781	9.16662	1.90119	4.82152	1.42467e-06	8.70608e-05	Upregulated	protein_coding
ENSG00000177494.6	43.4752	5.82512	1.75012	3.32841	0.000873433	0.0123566	Upregulated	protein_coding
ENSG00000177535.10	20.3683	6.62348	2.18206	3.03543	0.00240193	0.0262332	Upregulated	protein_coding
ENSG00000177628.16	143.804	5.27765	1.37764	3.83093	0.000127662	0.00281403	Upregulated	protein_coding
ENSG00000177669.4	23.2958	6.90749	2.01776	3.42334	0.000618563	0.00956826	Upregulated	protein_coding
ENSG00000177692.13	20.3504	6.84335	1.86904	3.66143	0.000250811	0.00476072	Upregulated	protein_coding
ENSG00000177706.9	68.3034	8.57957	2.00696	4.27491	1.91211e-05	0.000662456	Upregulated	protein_coding
ENSG00000177731.16	1869.61	4.4177	1.28003	3.45124	0.000558018	0.00885739	Upregulated	protein_coding
ENSG00000177954.14	23008.6	3.16323	0.800764	3.95026	7.80658e-05	0.00192176	Upregulated	protein_coding
ENSG00000178115.12	14.0523	5.62587	1.91853	2.93239	0.00336364	0.0338612	Upregulated	protein_coding
ENSG00000178234.13	1032.26	1.84059	0.488875	3.76495	0.000166585	0.00348295	Upregulated	protein_coding
ENSG00000178301.4	34.1345	2.94158	1.05343	2.79239	0.00523201	0.0475007	Upregulated	protein_coding
ENSG00000178752.16	1047.03	-2.28526	0.704323	-3.24463	0.00117605	0.0154405	Downregulated	protein_coding
ENSG00000178789.9	146.621	9.49393	2.01313	4.71601	2.40518e-06	0.000127628	Upregulated	protein_coding
ENSG00000178917.18	204.883	7.69775	1.50306	5.1214	3.03274e-07	2.51441e-05	Upregulated	protein_coding
ENSG00000178951.9	1871.61	-2.33229	0.829558	-2.81149	0.0049313	0.0454594	Downregulated	protein_coding
ENSG00000178982.10	2537.62	12.494	1.80286	6.93007	4.20627e-12	1.00817e-08	Upregulated	protein_coding
ENSG00000179051.14	1361.19	4.12001	0.96148	4.28507	1.82682e-05	0.000636251	Upregulated	protein_coding
ENSG00000179241.13	41.4533	-1.6805	0.570126	-2.9476	0.00320255	0.0326874	Downregulated	protein_coding
ENSG00000179639.11	125.711	5.4763	1.45713	3.75827	0.000171094	0.00355469	Upregulated	protein_coding
ENSG00000179833.4	2070.94	-1.41405	0.503711	-2.80725	0.00499658	0.0458527	Downregulated	protein_coding
ENSG00000179841.8	192.487	2.64726	0.762228	3.47305	0.000514574	0.00834877	Upregulated	protein_coding
ENSG00000179886.6	71.2295	6.11046	1.43686	4.25264	2.11264e-05	0.000712272	Upregulated	protein_coding
ENSG00000179889.20	1126.07	4.28995	0.847237	5.06346	4.11718e-07	3.22105e-05	Upregulated	protein_coding
ENSG00000179914.5	1751.09	2.93117	0.845309	3.46757	0.000525183	0.00845843	Upregulated	protein_coding
ENSG00000179950.15	848.591	5.01721	0.998593	5.02428	5.05334e-07	3.78498e-05	Upregulated	protein_coding
ENSG00000179988.15	172.074	1.49111	0.412324	3.61635	0.00029879	0.00550496	Upregulated	protein_coding
ENSG00000180116.15	8.41814	6.18126	2.19917	2.81073	0.00494295	0.045519	Upregulated	protein_coding
ENSG00000180138.7	79.2186	7.50227	2.12641	3.52814	0.000418488	0.00718323	Upregulated	protein_coding
ENSG00000180332.7	52.447	8.15328	1.93227	4.21954	2.44801e-05	0.000790954	Upregulated	protein_coding
ENSG00000180336.18	35.7738	4.25441	1.51357	2.81085	0.00494107	0.0455176	Upregulated	protein_coding
ENSG00000180479.15	180.634	1.79493	0.495585	3.62185	0.000292501	0.00539672	Upregulated	protein_coding
ENSG00000180596.9	1791.41	-4.56499	1.33263	-3.42556	0.000613532	0.00950957	Downregulated	protein_coding
ENSG00000180739.15	354.144	2.55539	0.908623	2.81238	0.00491769	0.0453973	Upregulated	protein_coding
ENSG00000180900.20	354.292	3.30231	0.90058	3.66687	0.000245538	0.00468762	Upregulated	protein_coding
ENSG00000180917.18	636.45	4.36077	0.994815	4.3835	1.16787e-05	0.00046094	Upregulated	protein_coding
ENSG00000180999.11	60.901	5.82349	1.77525	3.28037	0.0010367	0.0140698	Upregulated	protein_coding
ENSG00000181135.16	162.392	5.90142	1.16246	5.07667	3.84108e-07	3.06318e-05	Upregulated	protein_coding
ENSG00000181215.16	42.8519	4.0655	1.45075	2.80235	0.00507319	0.04633	Upregulated	protein_coding
ENSG00000181218.6	370.315	8.32127	1.72456	4.82514	1.39901e-06	8.57791e-05	Upregulated	protein_coding
ENSG00000181220.18	1279.31	-1.34225	0.457223	-2.93565	0.00332853	0.033649	Downregulated	protein_coding
ENSG00000181222.19	1846.23	8.92787	1.45539	6.13435	8.55108e-10	4.09908e-07	Upregulated	protein_coding
ENSG00000181284.3	49.4103	8.13636	1.91393	4.25114	2.12687e-05	0.000716154	Upregulated	protein_coding
ENSG00000181322.15	58.6026	3.70484	1.0724	3.4547	0.000550895	0.00878135	Upregulated	protein_coding
ENSG00000181481.14	161.293	7.34111	1.54766	4.74335	2.10215e-06	0.000115706	Upregulated	protein_coding
ENSG00000181541.6	24.3751	5.75806	1.72072	3.34631	0.000818945	0.0118115	Upregulated	protein_coding
ENSG00000181847.12	303.259	2.33885	0.670266	3.48943	0.000484059	0.0079885	Upregulated	protein_coding
ENSG00000181885.18	12.3049	6.33972	1.88097	3.37046	0.000750437	0.011078	Upregulated	protein_coding
ENSG00000182004.13	607.671	2.08811	0.746977	2.79541	0.00518338	0.0471241	Upregulated	protein_coding
ENSG00000182117.7	723.732	7.24968	1.36376	5.31594	1.06107e-07	1.14185e-05	Upregulated	protein_coding
ENSG00000182162.11	14.1998	6.85073	1.88887	3.62689	0.000286852	0.0053222	Upregulated	protein_coding
ENSG00000182208.15	648.177	8.29872	1.34177	6.1849	6.21413e-10	3.72353e-07	Upregulated	protein_coding
ENSG00000182307.14	286.342	8.52296	1.62197	5.25469	1.48277e-07	1.44255e-05	Upregulated	protein_coding
ENSG00000182325.11	61.6701	8.5057	2.05058	4.14794	3.35476e-05	0.00100738	Upregulated	protein_coding
ENSG00000182362.14	223.861	1.56926	0.521032	3.01183	0.00259678	0.0277632	Upregulated	protein_coding
ENSG00000182372.10	516.355	7.30712	1.36383	5.35778	8.42517e-08	9.69998e-06	Upregulated	protein_coding
ENSG00000182551.14	514.366	1.54219	0.468859	3.28925	0.00100455	0.0136875	Upregulated	protein_coding
ENSG00000182732.18	1071.3	1.7938	0.643738	2.78654	0.00532735	0.0480354	Upregulated	protein_coding
ENSG00000182774.13	153.457	10.0188	1.94658	5.14689	2.64843e-07	2.25245e-05	Upregulated	protein_coding
ENSG00000182866.18	2362.46	1.75808	0.543133	3.23693	0.00120824	0.0157784	Upregulated	protein_coding
ENSG00000182871.16	487.998	6.62663	1.13898	5.81806	5.95347e-09	1.63503e-06	Upregulated	protein_coding
ENSG00000182952.5	854.464	12.2478	2.12933	5.75193	8.82298e-09	2.16672e-06	Upregulated	protein_coding
ENSG00000182973.20	1045.32	5.24119	1.25222	4.18552	2.84516e-05	0.000889829	Upregulated	protein_coding
ENSG00000182993.5	106.986	2.91472	0.896599	3.25087	0.00115054	0.0151822	Upregulated	protein_coding
ENSG00000183020.15	764.292	3.01651	0.859587	3.50925	0.000449375	0.00755464	Upregulated	protein_coding
ENSG00000183054.13	45.7059	2.9363	0.835038	3.51636	0.0004375	0.00739081	Upregulated	protein_coding
ENSG00000183091.21	323.46	1.69704	0.419616	4.04426	5.24893e-05	0.00139364	Upregulated	protein_coding
ENSG00000183172.9	192.797	10.2182	2.0074	5.09026	3.57578e-07	2.89188e-05	Upregulated	protein_coding
ENSG00000183309.12	314.193	3.52246	0.969702	3.63251	0.000280675	0.00524078	Upregulated	protein_coding
ENSG00000183323.13	782.237	6.14571	1.39799	4.3961	1.10215e-05	0.00044111	Upregulated	protein_coding
ENSG00000183426.17	27.469	3.29136	1.15849	2.84107	0.00449628	0.0423127	Upregulated	protein_coding
ENSG00000183474.16	145.005	2.60515	0.914022	2.8502	0.00436914	0.0413552	Upregulated	protein_coding
ENSG00000183682.8	64.4261	4.30431	1.02357	4.2052	2.60852e-05	0.000829597	Upregulated	protein_coding
ENSG00000183688.4	1706.07	8.02054	1.33492	6.00827	1.8751e-09	7.30916e-07	Upregulated	protein_coding
ENSG00000183751.16	172.057	10.1071	2.04749	4.93633	7.9608e-07	5.4658e-05	Upregulated	protein_coding
ENSG00000183856.11	253.266	9.46562	2.11707	4.47109	7.78235e-06	0.000334172	Upregulated	protein_coding
ENSG00000183921.8	28.8788	7.6187	2.09873	3.63015	0.000283258	0.0052778	Upregulated	protein_coding
ENSG00000183977.14	78.266	7.57764	1.80587	4.19611	2.71536e-05	0.000855321	Upregulated	protein_coding
ENSG00000184009.13	10189.4	8.25557	1.09228	7.55813	4.08899e-14	2.15612e-10	Upregulated	protein_coding
ENSG00000184060.11	103.074	4.34641	1.09	3.98752	6.67679e-05	0.00169589	Upregulated	protein_coding
ENSG00000184110.15	100.11	-2.57849	0.688122	-3.74715	0.000178857	0.00368403	Downregulated	protein_coding
ENSG00000184194.6	17.8891	-4.26162	1.26689	-3.36385	0.000768624	0.0112707	Downregulated	protein_coding
ENSG00000184221.13	39.5904	-2.89425	0.687094	-4.21231	2.52773e-05	0.000808038	Downregulated	protein_coding
ENSG00000184350.11	18.1284	-4.25952	1.53356	-2.77754	0.00547725	0.0489683	Downregulated	protein_coding
ENSG00000184434.8	23.696	7.03558	1.99739	3.52239	0.000427674	0.00727929	Upregulated	protein_coding
ENSG00000184489.13	75.9216	4.99634	1.46403	3.41274	0.00064313	0.00981826	Upregulated	protein_coding
ENSG00000184545.11	41.1964	5.67951	1.73409	3.27521	0.00105583	0.0142975	Upregulated	protein_coding
ENSG00000184584.14	251.384	10.5193	1.93889	5.42544	5.78109e-08	7.32781e-06	Upregulated	protein_coding
ENSG00000184611.14	34.7955	7.43916	2.15099	3.45848	0.000543226	0.00868912	Upregulated	protein_coding
ENSG00000184613.11	1970.75	2.29123	0.531778	4.30863	1.64271e-05	0.00058527	Upregulated	protein_coding
ENSG00000184786.6	99.2902	9.3572	1.98614	4.71124	2.46211e-06	0.000130087	Upregulated	protein_coding
ENSG00000184897.7	1664.16	-2.73264	0.608992	-4.48716	7.21795e-06	0.000314548	Downregulated	protein_coding
ENSG00000184956.16	56.9328	8.39709	2.03229	4.13184	3.59878e-05	0.00105054	Upregulated	protein_coding
ENSG00000184967.7	86.7521	7.77459	1.84369	4.21687	2.47717e-05	0.000797443	Upregulated	protein_coding
ENSG00000184983.11	921.901	12.5645	2.13925	5.87333	4.27133e-09	1.30946e-06	Upregulated	protein_coding
ENSG00000184984.10	28.2827	7.08516	2.00863	3.52737	0.000419716	0.00719934	Upregulated	protein_coding
ENSG00000185000.12	344.387	9.74315	1.97665	4.92913	8.25961e-07	5.65622e-05	Upregulated	protein_coding
ENSG00000185115.6	502.495	7.71369	1.43175	5.38759	7.14076e-08	8.63606e-06	Upregulated	protein_coding
ENSG00000185122.11	298.033	10.7901	1.94699	5.54196	2.99098e-08	4.82576e-06	Upregulated	protein_coding
ENSG00000185163.10	221.682	9.0851	1.82194	4.98649	6.14858e-07	4.38128e-05	Upregulated	protein_coding
ENSG00000185245.9	78.7948	-1.77833	0.562332	-3.16242	0.00156466	0.0191781	Downregulated	protein_coding
ENSG00000185271.9	15.4708	5.59944	1.85291	3.02198	0.00251131	0.0270358	Upregulated	protein_coding
ENSG00000185272.14	32.5081	2.88159	1.01386	2.84218	0.00448056	0.0421893	Upregulated	protein_coding
ENSG00000185340.16	209.909	-3.90446	1.00816	-3.87287	0.000107562	0.00246327	Downregulated	protein_coding
ENSG00000185432.12	2360.6	-2.28823	0.606107	-3.77529	0.000159824	0.00337371	Downregulated	protein_coding
ENSG00000185477.5	2066.86	1.74422	0.553117	3.15344	0.00161358	0.0196047	Upregulated	protein_coding
ENSG00000185561.10	30.3385	5.12618	1.78249	2.87585	0.00402935	0.0389278	Upregulated	protein_coding
ENSG00000185567.7	102.796	5.33445	1.36643	3.90394	9.46389e-05	0.00221989	Upregulated	protein_coding
ENSG00000185664.15	111.326	3.35002	1.00506	3.33314	0.000858722	0.0122422	Upregulated	protein_coding
ENSG00000185697.17	1228.69	2.46623	0.715843	3.44522	0.000570599	0.00900289	Upregulated	protein_coding
ENSG00000185716.12	134.737	4.76379	1.18589	4.01706	5.89281e-05	0.00153978	Upregulated	protein_coding
ENSG00000185803.12	106.609	9.52538	1.96139	4.85644	1.19518e-06	7.59901e-05	Upregulated	protein_coding
ENSG00000185829.19	155.869	3.31541	1.07316	3.08939	0.00200567	0.0231015	Upregulated	protein_coding
ENSG00000185862.7	597.478	11.583	2.10167	5.51135	3.56096e-08	5.45841e-06	Upregulated	protein_coding
ENSG00000185880.13	313.766	5.90058	1.23907	4.7621	1.91586e-06	0.000108394	Upregulated	protein_coding
ENSG00000185899.1	12.9314	5.93769	2.08086	2.85348	0.0043243	0.0410256	Upregulated	protein_coding
ENSG00000185989.11	2370.26	6.07135	1.01993	5.95272	2.63718e-09	9.53749e-07	Upregulated	protein_coding
ENSG00000186166.9	631.839	11.9448	1.94696	6.13513	8.50894e-10	4.09908e-07	Upregulated	protein_coding
ENSG00000186185.14	531.68	-3.68473	1.03027	-3.57646	0.000348281	0.00621694	Downregulated	protein_coding
ENSG00000186187.12	276.346	-1.83462	0.590622	-3.10626	0.0018947	0.0220644	Downregulated	protein_coding
ENSG00000186399.11	20.9005	5.41794	1.81291	2.98854	0.00280318	0.0294563	Upregulated	protein_coding
ENSG00000186416.18	188.326	6.80232	1.30098	5.22863	1.70773e-07	1.60801e-05	Upregulated	protein_coding
ENSG00000186431.19	956.85	12.6473	2.05894	6.1426	8.118e-10	4.06335e-07	Upregulated	protein_coding
ENSG00000186446.12	33.5076	7.32918	2.16142	3.39091	0.000696609	0.0104666	Upregulated	protein_coding
ENSG00000186448.15	480.508	7.85701	1.49158	5.26757	1.38242e-07	1.38058e-05	Upregulated	protein_coding
ENSG00000186628.12	17.2787	6.65756	2.23861	2.97397	0.00293976	0.030555	Upregulated	protein_coding
ENSG00000186648.15	35.6271	7.9339	1.86556	4.25283	2.11086e-05	0.000712272	Upregulated	protein_coding
ENSG00000186818.13	86.8799	7.38454	1.75709	4.20272	2.63728e-05	0.000836726	Upregulated	protein_coding
ENSG00000186868.18	37.5251	7.47873	1.9402	3.85461	0.000115916	0.00260983	Upregulated	protein_coding
ENSG00000187017.18	633.218	-4.2179	0.870541	-4.84514	1.2652e-06	7.90448e-05	Downregulated	protein_coding
ENSG00000187091.14	315.758	1.43553	0.517638	2.77322	0.00555041	0.0494882	Upregulated	protein_coding
ENSG00000187105.9	35.16	7.84112	1.91331	4.0982	4.16373e-05	0.00117209	Upregulated	protein_coding
ENSG00000187116.14	714.825	6.77814	1.55869	4.34862	1.36997e-05	0.000519702	Upregulated	protein_coding
ENSG00000187144.11	36.0624	7.7342	2.16342	3.57499	0.000350242	0.00624349	Upregulated	protein_coding
ENSG00000187187.14	199.015	10.0061	1.96684	5.08742	3.62972e-07	2.91761e-05	Upregulated	protein_coding
ENSG00000187240.17	269.04	1.73854	0.480858	3.61548	0.000299787	0.00551563	Upregulated	protein_coding
ENSG00000187266.14	1131.19	-2.8504	0.688809	-4.13816	3.50105e-05	0.00103125	Downregulated	protein_coding
ENSG00000187627.18	25.9304	3.93044	1.27222	3.08944	0.00200534	0.0231015	Upregulated	protein_coding
ENSG00000187630.18	66.2403	7.02415	1.71996	4.08391	4.42834e-05	0.00123418	Upregulated	protein_coding
ENSG00000187650.4	101.066	4.4469	1.07294	4.14461	3.40397e-05	0.00101637	Upregulated	protein_coding
ENSG00000187726.9	53.8169	5.24796	1.33837	3.92115	8.81256e-05	0.00210456	Upregulated	protein_coding
ENSG00000187775.17	195.74	4.57234	0.915314	4.99538	5.87192e-07	4.24146e-05	Upregulated	protein_coding
ENSG00000187862.13	104.06	9.43916	1.92506	4.90331	9.42366e-07	6.29e-05	Upregulated	protein_coding
ENSG00000187994.14	275.83	9.28942	1.83768	5.05497	4.30468e-07	3.30883e-05	Upregulated	protein_coding
ENSG00000188056.12	64.0969	5.36059	1.53112	3.50108	0.000463374	0.00771297	Upregulated	protein_coding
ENSG00000188107.15	62.8776	4.977	1.36877	3.6361	0.000276795	0.00518671	Upregulated	protein_coding
ENSG00000188152.13	55.169	7.10394	1.85078	3.83836	0.00012386	0.0027488	Upregulated	protein_coding
ENSG00000188163.8	190.595	4.39389	1.05996	4.14533	3.39332e-05	0.00101434	Upregulated	protein_coding
ENSG00000188312.15	206.805	8.16404	1.6251	5.0237	5.06845e-07	3.78554e-05	Upregulated	protein_coding
ENSG00000188389.11	52.3253	7.36923	1.93397	3.81041	0.000138735	0.00300555	Upregulated	protein_coding
ENSG00000188452.15	79.7281	4.90459	1.36395	3.59586	0.000323318	0.00585662	Upregulated	protein_coding
ENSG00000188626.7	19.0385	6.64	2.11157	3.14458	0.00166326	0.0200511	Upregulated	protein_coding
ENSG00000188869.13	21.4345	6.49259	1.8426	3.5236	0.00042572	0.00726893	Upregulated	protein_coding
ENSG00000188931.4	47.6079	6.40423	1.83001	3.49956	0.000466023	0.00775186	Upregulated	protein_coding
ENSG00000189068.11	105.106	7.42531	1.93835	3.83074	0.00012776	0.00281403	Upregulated	protein_coding
ENSG00000189129.14	33.1236	3.93104	1.21794	3.2276	0.00124834	0.0161493	Upregulated	protein_coding
ENSG00000189221.11	108.526	-3.43876	1.09193	-3.14925	0.00163689	0.0198239	Downregulated	protein_coding
ENSG00000189292.17	27.5887	3.02204	1.05738	2.85805	0.00426251	0.0406001	Upregulated	protein_coding
ENSG00000189350.13	172.366	2.67822	0.792618	3.37895	0.000727623	0.01082	Upregulated	protein_coding
ENSG00000189430.13	101.983	9.58607	1.94678	4.92408	8.4759e-07	5.74466e-05	Upregulated	protein_coding
ENSG00000196132.14	22.8717	5.06612	1.54805	3.27258	0.00106569	0.0143718	Upregulated	protein_coding
ENSG00000196230.14	5020.79	11.5474	1.69114	6.82819	8.59945e-12	1.88937e-08	Upregulated	protein_coding
ENSG00000196305.19	3251.84	5.51455	1.06291	5.18816	2.12377e-07	1.91103e-05	Upregulated	protein_coding
ENSG00000196345.13	64.632	5.40459	1.66172	3.2524	0.00114435	0.0151232	Upregulated	protein_coding
ENSG00000196497.17	12.0568	6.25185	2.08629	2.99664	0.00272974	0.0288224	Upregulated	protein_coding
ENSG00000196511.15	409.607	2.15143	0.550939	3.90502	9.42157e-05	0.0022139	Upregulated	protein_coding
ENSG00000196553.15	29.0853	7.06253	1.89002	3.73674	0.000186422	0.00380124	Upregulated	protein_coding
ENSG00000196565.15	6892.41	7.68587	1.49012	5.15789	2.49746e-07	2.15181e-05	Upregulated	protein_coding
ENSG00000196616.15	41.4572	3.18978	1.06994	2.98127	0.00287053	0.0299491	Upregulated	protein_coding
ENSG00000196653.12	75.5096	4.77887	1.42541	3.35263	0.000800476	0.0116087	Upregulated	protein_coding
ENSG00000196655.12	396.868	8.61766	1.66355	5.18027	2.21561e-07	1.96986e-05	Upregulated	protein_coding
ENSG00000196683.12	1850.61	2.63516	0.736071	3.58004	0.000343537	0.00615226	Upregulated	protein_coding
ENSG00000196712.20	1613.89	5.04694	0.908207	5.55704	2.74395e-08	4.57876e-06	Upregulated	protein_coding
ENSG00000196890.5	1524.37	9.32286	1.57949	5.90247	3.58104e-09	1.18017e-06	Upregulated	protein_coding
ENSG00000196912.13	1131.79	8.93112	1.39448	6.40465	1.50716e-10	1.39285e-07	Upregulated	protein_coding
ENSG00000196943.14	548.861	6.90495	1.23461	5.59282	2.23412e-08	4.14806e-06	Upregulated	protein_coding
ENSG00000196954.14	1522.04	4.86361	1.06552	4.56454	5.00599e-06	0.000235264	Upregulated	protein_coding
ENSG00000196998.19	2276.4	10.6095	1.82241	5.82168	5.826e-09	1.63407e-06	Upregulated	protein_coding
ENSG00000197006.15	7717.56	5.59581	1.1954	4.68111	2.85332e-06	0.000146764	Upregulated	protein_coding
ENSG00000197020.12	504.372	5.89746	1.17127	5.03511	4.77575e-07	3.61818e-05	Upregulated	protein_coding
ENSG00000197057.10	298.145	2.87206	0.673465	4.26459	2.00266e-05	0.000683054	Upregulated	protein_coding
ENSG00000197140.15	33.9413	4.35048	1.34656	3.23082	0.00123438	0.0160238	Upregulated	protein_coding
ENSG00000197226.13	841.555	3.51758	0.833121	4.22218	2.41954e-05	0.00078464	Upregulated	protein_coding
ENSG00000197561.7	667.872	6.88112	1.62411	4.23684	2.26686e-05	0.000748946	Upregulated	protein_coding
ENSG00000197635.11	701.855	1.75034	0.625933	2.79637	0.00516807	0.0470151	Upregulated	protein_coding
ENSG00000197696.10	17.458	6.68519	1.96093	3.40919	0.00065155	0.00992382	Upregulated	protein_coding
ENSG00000197728.11	2278.83	3.85038	0.960603	4.0083	6.1158e-05	0.00158548	Upregulated	protein_coding
ENSG00000197753.11	102.227	6.51889	1.58637	4.10931	3.96851e-05	0.00113231	Upregulated	protein_coding
ENSG00000197766.9	339.048	4.42134	1.34088	3.29733	0.000976075	0.0134242	Upregulated	protein_coding
ENSG00000197782.15	435.767	9.68602	1.84123	5.26062	1.4357e-07	1.40442e-05	Upregulated	protein_coding
ENSG00000197885.11	187.788	1.78269	0.544328	3.27503	0.00105651	0.0142975	Upregulated	protein_coding
ENSG00000197935.7	18.6246	6.49969	2.17166	2.99295	0.00276293	0.0291084	Upregulated	protein_coding
ENSG00000197976.12	5.93572	5.14995	1.85743	2.77262	0.00556066	0.0495533	Upregulated	protein_coding
ENSG00000197978.10	71.3949	3.18568	0.898918	3.54391	0.000394245	0.00686543	Upregulated	protein_coding
ENSG00000198000.12	1310.66	6.17404	1.16827	5.28477	1.25862e-07	1.30643e-05	Upregulated	protein_coding
ENSG00000198169.9	201.233	7.69137	1.58618	4.84899	1.24092e-06	7.80829e-05	Upregulated	protein_coding
ENSG00000198420.10	112.723	2.56231	0.769819	3.32845	0.000873294	0.0123566	Upregulated	protein_coding
ENSG00000198435.4	90.7937	-3.10808	0.797007	-3.8997	9.63134e-05	0.00225116	Downregulated	protein_coding
ENSG00000198478.8	595.443	-1.69991	0.613563	-2.77056	0.00559597	0.0497765	Downregulated	protein_coding
ENSG00000198523.6	78.7112	8.72918	1.96401	4.44457	8.80697e-06	0.000372706	Upregulated	protein_coding
ENSG00000198563.14	741.201	7.91821	1.28212	6.17589	6.57921e-10	3.76151e-07	Upregulated	protein_coding
ENSG00000198682.13	135.919	1.97637	0.633919	3.11771	0.00182263	0.0214024	Upregulated	protein_coding
ENSG00000198690.10	840.43	5.49072	1.03598	5.30001	1.15797e-07	1.2115e-05	Upregulated	protein_coding
ENSG00000198719.9	24.1592	7.50144	2.40861	3.11443	0.00184303	0.0216058	Upregulated	protein_coding
ENSG00000198736.13	381.454	11.1907	2.12355	5.26982	1.36556e-07	1.37992e-05	Upregulated	protein_coding
ENSG00000198785.7	82.7246	3.40008	0.993196	3.42337	0.000618492	0.00956826	Upregulated	protein_coding
ENSG00000198804.2	78832.1	-2.69759	0.788204	-3.42245	0.000620587	0.00957389	Downregulated	protein_coding
ENSG00000198826.11	461.085	10.2196	2.04747	4.99134	5.99615e-07	4.29588e-05	Upregulated	protein_coding
ENSG00000198840.2	1528.67	-4.00428	0.931909	-4.29686	1.73236e-05	0.000607364	Downregulated	protein_coding
ENSG00000198862.14	1845.65	13.4575	2.42685	5.54528	2.9349e-08	4.77647e-06	Upregulated	protein_coding
ENSG00000198870.8	37.8391	7.80822	1.9299	4.04591	5.21195e-05	0.00138961	Upregulated	protein_coding
ENSG00000198932.13	747.016	1.70303	0.502862	3.38667	0.000707464	0.0105739	Upregulated	protein_coding
ENSG00000198938.2	26235.9	-2.31254	0.651268	-3.55083	0.000384022	0.00672293	Downregulated	protein_coding
ENSG00000198967.5	540.033	6.86049	1.49175	4.59896	4.24597e-06	0.000203536	Upregulated	protein_coding
ENSG00000203772.8	13.335	6.51949	2.21748	2.94004	0.00328168	0.0333031	Upregulated	protein_coding
ENSG00000203880.13	4822.95	2.09626	0.691477	3.03157	0.00243289	0.0263964	Upregulated	protein_coding
ENSG00000204099.12	14.6883	6.6748	2.32362	2.87258	0.00407132	0.0391844	Upregulated	protein_coding
ENSG00000204103.4	406.961	-2.53354	0.764357	-3.31461	0.000917725	0.0128103	Downregulated	protein_coding
ENSG00000204186.10	440.656	9.11203	1.59789	5.70254	1.18035e-08	2.61513e-06	Upregulated	protein_coding
ENSG00000204209.13	122.115	4.5046	1.21803	3.69826	0.000217085	0.0042617	Upregulated	protein_coding
ENSG00000204219.11	70.8618	8.19789	1.97946	4.14147	3.45081e-05	0.00102571	Upregulated	protein_coding
ENSG00000204220.12	204.016	10.4786	2.03275	5.1549	2.53769e-07	2.17935e-05	Upregulated	protein_coding
ENSG00000204227.5	298.781	10.8889	2.03939	5.33931	9.33006e-08	1.03792e-05	Upregulated	protein_coding
ENSG00000204228.4	56.5808	8.63066	1.94219	4.44378	8.83926e-06	0.000373473	Upregulated	protein_coding
ENSG00000204231.11	275.724	10.7037	1.97656	5.41532	6.1179e-08	7.71763e-06	Upregulated	protein_coding
ENSG00000204248.12	18.1063	6.62809	2.3566	2.81257	0.0049148	0.0453866	Upregulated	protein_coding
ENSG00000204252.14	600.992	9.61537	1.85721	5.17733	2.25084e-07	1.97811e-05	Upregulated	protein_coding
ENSG00000204256.14	2353.05	3.73648	0.934008	4.00048	6.32145e-05	0.00162918	Upregulated	protein_coding
ENSG00000204257.15	693.168	3.87183	1.03948	3.72477	0.000195491	0.00393445	Upregulated	protein_coding
ENSG00000204264.12	1021.12	12.5852	2.12862	5.91239	3.37176e-09	1.1397e-06	Upregulated	protein_coding
ENSG00000204267.19	775.326	8.81337	1.44742	6.08902	1.13602e-09	5.25458e-07	Upregulated	protein_coding
ENSG00000204287.14	5399.1	15.0582	2.40632	6.25775	3.90572e-10	2.65858e-07	Upregulated	protein_coding
ENSG00000204291.11	36.9456	-2.4128	0.757488	-3.18527	0.00144619	0.0180363	Downregulated	protein_coding
ENSG00000204301.6	53.0918	8.16564	2.00852	4.06549	4.79308e-05	0.0013027	Upregulated	protein_coding
ENSG00000204304.12	921.729	8.1316	1.34781	6.03319	1.60755e-09	6.83598e-07	Upregulated	protein_coding
ENSG00000204305.16	184.247	8.33775	1.89689	4.39549	1.10523e-05	0.000441506	Upregulated	protein_coding
ENSG00000204308.8	668.323	8.59757	1.6497	5.21158	1.87239e-07	1.73213e-05	Upregulated	protein_coding
ENSG00000204315.4	66.4275	8.8137	1.95028	4.51921	6.20714e-06	0.000279269	Upregulated	protein_coding
ENSG00000204344.16	99.5399	9.37593	2.217	4.22911	2.34618e-05	0.000769368	Upregulated	protein_coding
ENSG00000204348.10	111.737	9.47735	1.97044	4.80976	1.51114e-06	9.0548e-05	Upregulated	protein_coding
ENSG00000204351.13	702.869	10.8349	2.02718	5.34479	9.05219e-08	1.01992e-05	Upregulated	protein_coding
ENSG00000204356.14	626.551	10.6158	2.02809	5.23438	1.65544e-07	1.58136e-05	Upregulated	protein_coding
ENSG00000204371.12	288.389	10.6867	2.05761	5.19374	2.06112e-07	1.86101e-05	Upregulated	protein_coding
ENSG00000204386.12	393.155	9.60312	1.97271	4.86797	1.12748e-06	7.2858e-05	Upregulated	protein_coding
ENSG00000204388.7	100.496	9.35104	2.00402	4.66615	3.06902e-06	0.000155905	Upregulated	protein_coding
ENSG00000204389.10	597.929	11.9519	2.43579	4.90679	9.25809e-07	6.19943e-05	Upregulated	protein_coding
ENSG00000204390.10	63.44	8.49039	2.01422	4.21522	2.49537e-05	0.000801346	Upregulated	protein_coding
ENSG00000204392.11	31.5567	7.88877	2.08151	3.78993	0.00015069	0.00322741	Upregulated	protein_coding
ENSG00000204394.13	495.463	11.6628	2.09347	5.57102	2.53246e-08	4.42175e-06	Upregulated	protein_coding
ENSG00000204410.16	31.6715	7.64281	1.97644	3.86697	0.000110198	0.00250896	Upregulated	protein_coding
ENSG00000204420.10	37.1865	7.3702	2.096	3.51631	0.00043759	0.00739081	Upregulated	protein_coding
ENSG00000204427.12	109.461	9.5026	1.98871	4.77828	1.76802e-06	0.000101941	Upregulated	protein_coding
ENSG00000204428.12	18.3669	6.09245	2.02738	3.00509	0.00265502	0.028188	Upregulated	protein_coding
ENSG00000204435.15	115.054	7.14283	1.58992	4.49257	7.03679e-06	0.000307758	Upregulated	protein_coding
ENSG00000204438.11	238.369	10.5337	2.03067	5.18729	2.13371e-07	1.91345e-05	Upregulated	protein_coding
ENSG00000204439.4	236.776	9.19195	1.88966	4.86433	1.14845e-06	7.38511e-05	Upregulated	protein_coding
ENSG00000204444.11	75.2303	7.74552	1.89786	4.08118	4.48083e-05	0.0012421	Upregulated	protein_coding
ENSG00000204463.14	3268.13	10.5448	1.62144	6.50335	7.85516e-11	8.62922e-08	Upregulated	protein_coding
ENSG00000204469.13	1012.46	7.68742	1.32902	5.7843	7.28162e-09	1.81438e-06	Upregulated	protein_coding
ENSG00000204472.13	841.563	12.1683	2.13797	5.69152	1.25915e-08	2.69899e-06	Upregulated	protein_coding
ENSG00000204475.10	52.8591	8.64695	2.05817	4.20129	2.65401e-05	0.000840217	Upregulated	protein_coding
ENSG00000204482.11	968.491	12.5531	2.46489	5.09276	3.52894e-07	2.86278e-05	Upregulated	protein_coding
ENSG00000204498.11	50.8251	8.25874	1.94143	4.25394	2.10045e-05	0.00071089	Upregulated	protein_coding
ENSG00000204511.3	11.2806	6.72567	2.23596	3.00796	0.0026301	0.0280231	Upregulated	protein_coding
ENSG00000204516.10	244.063	8.26834	1.76385	4.68767	2.76327e-06	0.000142868	Upregulated	protein_coding
ENSG00000204520.14	165.748	6.71445	1.34267	5.00081	5.70901e-07	4.15796e-05	Upregulated	protein_coding
ENSG00000204525.18	5742.86	5.82663	1.11367	5.23191	1.67771e-07	1.58541e-05	Upregulated	protein_coding
ENSG00000204531.21	12.7744	6.42692	2.10594	3.0518	0.00227473	0.0252625	Upregulated	protein_coding
ENSG00000204536.15	211.806	4.85531	1.00067	4.85206	1.22186e-06	7.72527e-05	Upregulated	protein_coding
ENSG00000204560.10	674.045	9.49527	1.76301	5.38583	7.21109e-08	8.68129e-06	Upregulated	protein_coding
ENSG00000204564.12	87.3731	9.09392	1.95739	4.64594	3.38535e-06	0.000169364	Upregulated	protein_coding
ENSG00000204568.12	279.941	10.8247	2.05289	5.27289	1.34289e-07	1.3723e-05	Upregulated	protein_coding
ENSG00000204569.10	916.014	12.3843	2.12991	5.81451	6.08134e-09	1.65293e-06	Upregulated	protein_coding
ENSG00000204574.14	791.508	10.7082	2.01145	5.32362	1.01724e-07	1.09916e-05	Upregulated	protein_coding
ENSG00000204576.12	125.271	9.45173	1.96817	4.8023	1.56851e-06	9.31392e-05	Upregulated	protein_coding
ENSG00000204577.12	593.97	8.20793	1.36564	6.0103	1.8518e-09	7.30916e-07	Upregulated	protein_coding
ENSG00000204580.14	40.2213	7.66142	2.16465	3.53933	0.000401142	0.00695045	Upregulated	protein_coding
ENSG00000204590.13	749.653	12.3625	2.12281	5.82364	5.75797e-09	1.63235e-06	Upregulated	protein_coding
ENSG00000204592.9	16625.3	10.4713	1.38513	7.5598	4.03689e-14	2.15612e-10	Upregulated	protein_coding
ENSG00000204599.16	251.632	10.7438	1.98023	5.42555	5.77764e-08	7.32781e-06	Upregulated	protein_coding
ENSG00000204610.14	61.2639	8.5697	2.93001	2.9248	0.00344676	0.0345527	Upregulated	protein_coding
ENSG00000204613.11	3794.01	12.4745	2.33446	5.34361	9.11127e-08	1.02221e-05	Upregulated	protein_coding
ENSG00000204618.10	16.5735	6.7239	1.9105	3.51945	0.000432444	0.00734153	Upregulated	protein_coding
ENSG00000204619.8	182.761	6.87725	1.53875	4.46936	7.84531e-06	0.000336328	Upregulated	protein_coding
ENSG00000204642.14	1540.53	7.62992	1.37539	5.54746	2.89855e-08	4.7466e-06	Upregulated	protein_coding
ENSG00000204644.10	45.8477	19.6396	3.95228	4.96918	6.72354e-07	4.76522e-05	Upregulated	protein_coding
ENSG00000204681.11	388.15	9.48016	1.98583	4.7739	1.80694e-06	0.000103341	Upregulated	protein_coding
ENSG00000204713.11	524.758	11.4397	2.07487	5.51347	3.51834e-08	5.45654e-06	Upregulated	protein_coding
ENSG00000204767.4	576.128	7.21947	1.27588	5.65841	1.52778e-08	3.0748e-06	Upregulated	protein_coding
ENSG00000205045.12	2226.35	2.2314	0.648363	3.4416	0.000578292	0.00908892	Upregulated	protein_coding
ENSG00000205238.12	22.0793	7.03241	2.15321	3.26602	0.00109072	0.0146048	Upregulated	protein_coding
ENSG00000205476.9	441.716	3.11831	0.655249	4.75897	1.94581e-06	0.000109385	Upregulated	protein_coding
ENSG00000205531.14	9333	5.87492	1.11183	5.28401	1.26388e-07	1.30675e-05	Upregulated	protein_coding
ENSG00000205544.4	82.529	9.15011	1.99393	4.58898	4.45413e-06	0.000212356	Upregulated	protein_coding
ENSG00000205571.15	69.0735	7.5305	1.83096	4.11287	3.90779e-05	0.00111988	Upregulated	protein_coding
ENSG00000205572.11	10.4347	6.05018	1.95766	3.09051	0.00199812	0.0230347	Upregulated	protein_coding
ENSG00000205609.13	50.1351	-2.93694	0.940316	-3.12335	0.00178805	0.0211494	Downregulated	protein_coding
ENSG00000205683.12	437.269	-1.63491	0.585997	-2.78996	0.00527151	0.0476893	Downregulated	protein_coding
ENSG00000205702.12	39.2529	6.16264	1.94368	3.1706	0.00152123	0.0187504	Upregulated	protein_coding
ENSG00000205765.10	555.527	-1.2209	0.421635	-2.89562	0.00378407	0.0371914	Downregulated	protein_coding
ENSG00000205809.11	75.5936	2.97146	0.995961	2.98351	0.00284964	0.0298083	Upregulated	protein_coding
ENSG00000205810.9	96.1875	2.84291	0.936827	3.03461	0.00240844	0.0262608	Upregulated	protein_coding
ENSG00000206503.14	8055.99	3.60839	1.14048	3.16393	0.00155656	0.0190878	Upregulated	protein_coding
ENSG00000206557.6	21.0419	6.8691	2.19676	3.12692	0.00176648	0.0209412	Upregulated	protein_coding
ENSG00000212124.2	32.6462	7.44962	1.90511	3.91034	9.21676e-05	0.00218525	Upregulated	protein_coding
ENSG00000212126.3	17.0563	6.37741	2.15712	2.95644	0.00311213	0.0319266	Upregulated	protein_coding
ENSG00000212127.6	47.3844	6.78056	1.83829	3.68851	0.000225573	0.00439885	Upregulated	protein_coding
ENSG00000212128.2	20.8137	6.45134	2.24578	2.87265	0.00407048	0.0391844	Upregulated	protein_coding
ENSG00000212657.2	11.3848	6.10387	2.09455	2.91416	0.00356642	0.0354825	Upregulated	protein_coding
ENSG00000212807.3	28.1012	5.75294	1.68455	3.41511	0.000637559	0.00974608	Upregulated	protein_coding
ENSG00000212907.2	3623.73	-4.68091	1.3322	-3.51366	0.000441972	0.00745527	Downregulated	protein_coding
ENSG00000213588.6	65.1264	8.13996	1.97773	4.1158	3.85836e-05	0.00111054	Upregulated	protein_coding
ENSG00000213619.11	418.935	11.4827	2.01539	5.6975	1.21574e-08	2.67108e-06	Upregulated	protein_coding
ENSG00000213625.9	1220.17	-1.18225	0.402747	-2.93546	0.00333053	0.0336563	Downregulated	protein_coding
ENSG00000213654.10	394.33	8.1728	1.54811	5.27921	1.2974e-07	1.33097e-05	Upregulated	protein_coding
ENSG00000213676.13	332.747	7.63731	1.41349	5.40317	6.54739e-08	8.06645e-06	Upregulated	protein_coding
ENSG00000213719.8	2514.44	13.9981	2.4906	5.62039	1.9053e-08	3.77693e-06	Upregulated	protein_coding
ENSG00000213722.10	189.658	10.2959	2.02419	5.08643	3.64866e-07	2.92391e-05	Upregulated	protein_coding
ENSG00000213859.8	27.5776	7.43632	2.13487	3.48328	0.000495318	0.00812573	Upregulated	protein_coding
ENSG00000213903.9	433.955	7.00024	1.26674	5.5262	3.27247e-08	5.13564e-06	Upregulated	protein_coding
ENSG00000213906.10	58.5837	8.57695	1.75399	4.88997	1.00853e-06	6.6475e-05	Upregulated	protein_coding
ENSG00000213928.10	422.024	5.86341	1.06	5.5315	3.17504e-08	5.01257e-06	Upregulated	protein_coding
ENSG00000213934.9	855.1	3.6166	1.17567	3.07621	0.00209654	0.0239079	Upregulated	protein_coding
ENSG00000213949.10	248.084	1.81159	0.640679	2.82761	0.00468963	0.0437981	Upregulated	protein_coding
ENSG00000214026.11	400.826	11.3591	2.07955	5.46228	4.70067e-08	6.46507e-06	Upregulated	protein_coding
ENSG00000214872.9	29.3057	7.7752	1.92213	4.0451	5.23004e-05	0.00139283	Upregulated	protein_coding
ENSG00000215041.10	302.306	10.8812	1.97912	5.498	3.84133e-08	5.72185e-06	Upregulated	protein_coding
ENSG00000217930.8	69.7811	3.79379	1.12105	3.38415	0.000713997	0.0106534	Upregulated	protein_coding
ENSG00000219481.11	360.455	3.77388	0.929704	4.05923	4.92348e-05	0.00133373	Upregulated	protein_coding
ENSG00000221843.6	22.1141	7.00998	2.39038	2.93258	0.00336161	0.0338537	Upregulated	protein_coding
ENSG00000221970.4	27.8293	6.80549	2.09537	3.24788	0.0011627	0.0152967	Upregulated	protein_coding
ENSG00000223501.9	585.3	11.7933	2.08151	5.66575	1.46381e-08	2.99173e-06	Upregulated	protein_coding
ENSG00000224383.8	32.0031	3.77129	0.930601	4.05253	5.06659e-05	0.00136398	Upregulated	protein_coding
ENSG00000225190.12	823.449	5.97062	1.08527	5.50151	3.76543e-08	5.64066e-06	Upregulated	protein_coding
ENSG00000225526.6	37.7343	4.92419	1.67959	2.93179	0.0033702	0.0339142	Upregulated	protein_coding
ENSG00000225663.8	179.914	10.2707	2.01625	5.09397	3.50649e-07	2.85335e-05	Upregulated	protein_coding
ENSG00000226650.6	6.58145	-4.60894	1.52348	-3.02526	0.00248419	0.0267985	Downregulated	protein_coding
ENSG00000226761.3	23.0656	7.10475	2.33427	3.04367	0.00233709	0.0257168	Upregulated	protein_coding
ENSG00000226979.9	13.3984	6.07803	2.04442	2.97298	0.0029492	0.0305764	Upregulated	protein_coding
ENSG00000227057.10	507.598	11.5483	2.06805	5.58413	2.34867e-08	4.23589e-06	Upregulated	protein_coding
ENSG00000227507.3	869.806	12.1028	2.1263	5.69195	1.25596e-08	2.69899e-06	Upregulated	protein_coding
ENSG00000228278.5	92.0365	4.70751	1.34343	3.5041	0.000458154	0.00765963	Upregulated	protein_coding
ENSG00000228486.11	73.5767	8.90644	1.95318	4.55996	5.11639e-06	0.000239173	Upregulated	protein_coding
ENSG00000229117.9	17743.8	5.86027	1.09575	5.34816	8.88516e-08	1.0141e-05	Upregulated	protein_coding
ENSG00000229314.6	413.561	4.41581	1.4941	2.9555	0.00312161	0.0320114	Upregulated	protein_coding
ENSG00000229894.5	63.038	4.11678	1.3801	2.98297	0.00285466	0.0298324	Upregulated	protein_coding
ENSG00000231389.8	1906.65	13.7915	2.13635	6.45567	1.07741e-10	1.05207e-07	Upregulated	protein_coding
ENSG00000231500.7	16049.6	14.9977	2.48885	6.02595	1.68115e-09	7.03549e-07	Upregulated	protein_coding
ENSG00000231887.9	351.254	2.37277	0.665762	3.56399	0.000365259	0.00645693	Upregulated	protein_coding
ENSG00000231925.14	1058.64	7.70769	1.32897	5.79974	6.64159e-09	1.74325e-06	Upregulated	protein_coding
ENSG00000232119.8	422.288	8.55555	1.68656	5.07279	3.92025e-07	3.09454e-05	Upregulated	protein_coding
ENSG00000232653.9	93.2527	5.22325	1.42066	3.67664	0.000236326	0.00456002	Upregulated	protein_coding
ENSG00000232810.5	64.3225	8.51555	1.96861	4.32566	1.52074e-05	0.000553787	Upregulated	protein_coding
ENSG00000233436.8	66.2686	8.74823	1.9789	4.42075	9.83592e-06	0.000405194	Upregulated	protein_coding
ENSG00000234127.9	297.044	10.8535	2.01355	5.39025	7.03596e-08	8.54852e-06	Upregulated	protein_coding
ENSG00000234511.11	139.925	9.35443	1.91182	4.89295	9.93358e-07	6.58037e-05	Upregulated	protein_coding
ENSG00000234745.14	11717.6	5.60718	1.02631	5.46344	4.66989e-08	6.46507e-06	Upregulated	protein_coding
ENSG00000235863.4	159.556	9.72372	2.0363	4.77519	1.79534e-06	0.000103124	Upregulated	protein_coding
ENSG00000236104.3	194.334	10.1538	2.03423	4.99148	5.99196e-07	4.29588e-05	Upregulated	protein_coding
ENSG00000237441.10	684.062	11.896	2.09728	5.67209	1.41065e-08	2.92849e-06	Upregulated	protein_coding
ENSG00000237541.4	114.855	7.75058	1.88528	4.1111	3.93786e-05	0.00112483	Upregulated	protein_coding
ENSG00000237649.8	334.925	7.94058	1.76567	4.4972	6.88533e-06	0.000304447	Upregulated	protein_coding
ENSG00000238269.9	1211.42	2.97232	0.885285	3.35748	0.000786574	0.0114395	Upregulated	protein_coding
ENSG00000239388.9	70.8959	7.18501	1.81279	3.96352	7.38537e-05	0.00183867	Upregulated	protein_coding
ENSG00000239998.7	338.547	7.01809	1.27533	5.50294	3.73513e-08	5.62724e-06	Upregulated	protein_coding
ENSG00000240038.8	427.011	1.48113	0.485936	3.04799	0.00230376	0.0254777	Upregulated	protein_coding
ENSG00000240053.9	48.3906	8.31663	1.95398	4.25626	2.07875e-05	0.000705615	Upregulated	protein_coding
ENSG00000240065.8	636.928	11.8974	2.05388	5.79263	6.92927e-09	1.77369e-06	Upregulated	protein_coding
ENSG00000240403.5	21.8447	7.50598	2.53396	2.96216	0.00305491	0.0314251	Upregulated	protein_coding
ENSG00000240694.9	32.8545	7.90737	1.82343	4.33654	1.44741e-05	0.000538956	Upregulated	protein_coding
ENSG00000241106.8	111.086	9.53113	2.06015	4.62643	3.72018e-06	0.000182649	Upregulated	protein_coding
ENSG00000241370.6	22.6394	7.22231	2.34248	3.08318	0.002048	0.0234662	Upregulated	protein_coding
ENSG00000242574.9	1090.09	7.22168	1.21387	5.94932	2.69254e-09	9.5931e-07	Upregulated	protein_coding
ENSG00000242612.7	59.8289	5.83181	1.56788	3.71954	0.000199584	0.0039864	Upregulated	protein_coding
ENSG00000242950.7	32.6948	6.04824	1.77105	3.41507	0.000637663	0.00974608	Upregulated	protein_coding
ENSG00000243649.10	23.2717	7.24407	2.15132	3.36726	0.00075918	0.0111716	Upregulated	protein_coding
ENSG00000244482.10	207.976	3.56765	1.02857	3.46855	0.000523285	0.00844315	Upregulated	protein_coding
ENSG00000249437.8	377.281	3.67385	1.09273	3.36209	0.00077354	0.0113114	Upregulated	protein_coding
ENSG00000250479.9	50.7051	6.74812	2.04714	3.29636	0.000979461	0.0134404	Upregulated	protein_coding
ENSG00000253309.7	21.9111	5.3998	1.81079	2.98201	0.00286361	0.0298888	Upregulated	protein_coding
ENSG00000253457.4	20.3538	7.01735	1.9187	3.65735	0.000254833	0.00482317	Upregulated	protein_coding
ENSG00000254093.9	103.042	2.46518	0.76724	3.21305	0.00131333	0.016788	Upregulated	protein_coding
ENSG00000254505.11	76.076	6.25566	1.41827	4.41075	1.03012e-05	0.000421724	Upregulated	protein_coding
ENSG00000255274.10	55.9056	3.45059	0.947858	3.64041	0.000272203	0.0051225	Upregulated	protein_coding
ENSG00000255374.3	23.9517	7.16186	2.10848	3.39669	0.000682067	0.0103171	Upregulated	protein_coding
ENSG00000255582.1	13.4936	6.37808	2.11329	3.01808	0.00254385	0.0273396	Upregulated	protein_coding
ENSG00000255837.2	50.0138	6.72141	1.8093	3.71493	0.000203261	0.0040537	Upregulated	protein_coding
ENSG00000256043.5	310.43	10.7666	2.05689	5.23439	1.65533e-07	1.58136e-05	Upregulated	protein_coding
ENSG00000256188.3	136.712	9.57247	1.87175	5.11417	3.15118e-07	2.59627e-05	Upregulated	protein_coding
ENSG00000256436.1	52.6852	7.877	1.9207	4.1011	4.11192e-05	0.0011608	Upregulated	protein_coding
ENSG00000256537.5	419.74	8.87317	1.68643	5.26151	1.42876e-07	1.40442e-05	Upregulated	protein_coding
ENSG00000256574.8	27.0735	4.85097	1.70151	2.85098	0.00435848	0.0412756	Upregulated	protein_coding
ENSG00000257093.7	1573.8	9.17209	1.41743	6.47094	9.73924e-11	1.0271e-07	Upregulated	protein_coding
ENSG00000257103.9	3336.47	4.53769	0.952747	4.76274	1.90982e-06	0.000108288	Upregulated	protein_coding
ENSG00000257335.8	2427.04	2.48993	0.895129	2.78165	0.00540839	0.0485008	Upregulated	protein_coding
ENSG00000257743.9	63.7449	7.94672	1.96415	4.04588	5.21268e-05	0.00138961	Upregulated	protein_coding
ENSG00000259207.10	929.864	-2.54448	0.867537	-2.93299	0.00335715	0.033839	Downregulated	protein_coding
ENSG00000259417.3	11.9079	6.39199	1.95741	3.26553	0.00109259	0.0146149	Upregulated	protein_coding
ENSG00000259823.6	29.2542	5.97943	1.83096	3.26573	0.00109184	0.0146123	Upregulated	protein_coding
ENSG00000260007.3	194.377	1.93363	0.667559	2.89656	0.00377273	0.0371288	Upregulated	protein_coding
ENSG00000260097.3	25.8178	7.35279	1.92811	3.81348	0.000137024	0.00298565	Upregulated	protein_coding
ENSG00000262246.6	376.624	7.00913	1.28386	5.45941	4.77731e-08	6.49247e-06	Upregulated	protein_coding
ENSG00000266338.7	415.201	1.88532	0.600148	3.14142	0.00168132	0.0201766	Upregulated	protein_coding
ENSG00000267710.9	30.3482	7.55489	2.05644	3.67378	0.000238988	0.00458705	Upregulated	protein_coding
ENSG00000269313.6	34.9497	6.58725	2.00697	3.28218	0.00103007	0.0139989	Upregulated	protein_coding
ENSG00000270231.5	306.988	2.24108	0.698785	3.2071	0.00134079	0.0169707	Upregulated	protein_coding
ENSG00000270379.6	21.6767	7.13784	2.38409	2.99395	0.00275392	0.0290545	Upregulated	protein_coding
ENSG00000270647.7	1025.35	9.6031	1.42666	6.73116	1.6832e-11	3.16983e-08	Upregulated	protein_coding
ENSG00000271503.7	1582.9	8.52593	1.49225	5.71349	1.10685e-08	2.53758e-06	Upregulated	protein_coding
ENSG00000272325.2	260.051	-3.45699	0.784458	-4.40685	1.04886e-05	0.000425845	Downregulated	protein_coding
ENSG00000272442.2	10.8306	6.41037	2.10115	3.05088	0.00228168	0.0253291	Upregulated	protein_coding
ENSG00000272636.5	46.3648	5.26028	1.37786	3.81771	0.000134695	0.00294097	Upregulated	protein_coding
ENSG00000273136.8	732.791	1.64738	0.555682	2.96461	0.00303068	0.0312613	Upregulated	protein_coding
ENSG00000273559.5	636.871	8.35738	1.39015	6.01186	1.83408e-09	7.30916e-07	Upregulated	protein_coding
ENSG00000273611.5	340.991	10.9789	2.04358	5.37238	7.77058e-08	9.14604e-06	Upregulated	protein_coding
ENSG00000273749.5	471.839	6.49939	1.1641	5.58317	2.36175e-08	4.23589e-06	Upregulated	protein_coding
ENSG00000273841.6	804.981	6.65709	1.38161	4.81835	1.44747e-06	8.77302e-05	Upregulated	protein_coding
ENSG00000274070.2	1480.43	-2.42601	0.845328	-2.86991	0.00410591	0.0394505	Downregulated	protein_coding
ENSG00000274211.6	303.648	2.98288	0.715387	4.16961	3.05126e-05	0.0009387	Upregulated	protein_coding
ENSG00000275004.4	23.8959	6.76347	2.07489	3.25967	0.00111542	0.0148077	Upregulated	protein_coding
ENSG00000275023.5	1587.56	10.2937	1.56487	6.57799	4.7685e-11	5.98673e-08	Upregulated	protein_coding
ENSG00000275066.5	2278.24	4.62669	1.13065	4.09205	4.27574e-05	0.00119798	Upregulated	protein_coding
ENSG00000275183.2	26.4886	7.37072	1.88478	3.91066	9.20439e-05	0.00218428	Upregulated	protein_coding
ENSG00000275302.2	154.422	9.89239	1.99399	4.96111	7.00903e-07	4.92782e-05	Upregulated	protein_coding
ENSG00000275395.7	229.309	6.91557	1.23186	5.61393	1.97778e-08	3.86252e-06	Upregulated	protein_coding
ENSG00000275700.6	810.841	12.4183	2.11381	5.87483	4.23268e-09	1.30946e-06	Upregulated	protein_coding
ENSG00000275835.5	616.698	8.26812	1.38902	5.9525	2.64076e-09	9.53749e-07	Upregulated	protein_coding
ENSG00000276023.5	59.4225	8.13639	1.90758	4.2653	1.99632e-05	0.000683054	Upregulated	protein_coding
ENSG00000276045.4	194.172	8.70762	1.84041	4.73135	2.23032e-06	0.000120993	Upregulated	protein_coding
ENSG00000276070.5	28.9742	6.61875	2.10926	3.13795	0.00170136	0.0203707	Upregulated	protein_coding
ENSG00000276085.1	60.2665	8.71622	2.70734	3.21948	0.00128425	0.0165006	Upregulated	protein_coding
ENSG00000276231.5	196.734	-1.49387	0.499066	-2.99332	0.00275959	0.0291027	Downregulated	protein_coding
ENSG00000276234.5	468.295	5.34268	1.06226	5.02952	4.91711e-07	3.70399e-05	Upregulated	protein_coding
ENSG00000276293.5	776.187	10.7464	2.02215	5.31433	1.07049e-07	1.14729e-05	Upregulated	protein_coding
ENSG00000277161.2	92.2556	7.83239	1.86471	4.20033	2.66525e-05	0.000841548	Upregulated	protein_coding
ENSG00000277632.2	35.5154	7.92959	2.16386	3.66456	0.000247761	0.0047164	Upregulated	protein_coding
ENSG00000277791.5	910.212	11.2162	2.06304	5.4367	5.42751e-08	7.11922e-06	Upregulated	protein_coding
ENSG00000277972.2	62.5187	8.6827	1.94991	4.45288	8.4727e-06	0.000359715	Upregulated	protein_coding
ENSG00000278053.5	1142.94	2.86709	0.922722	3.10721	0.0018886	0.0220225	Upregulated	protein_coding
ENSG00000278259.5	761.898	10.8887	2.0387	5.34099	9.24382e-08	1.03268e-05	Upregulated	protein_coding
ENSG00000278311.5	1905.81	6.68932	1.13397	5.899	3.65705e-09	1.18533e-06	Upregulated	protein_coding
ENSG00000278535.5	62.8207	4.15595	1.26382	3.28841	0.00100754	0.013721	Upregulated	protein_coding
ENSG00000278540.5	598.552	4.73831	0.916635	5.16924	2.35046e-07	2.0588e-05	Upregulated	protein_coding
ENSG00000278619.5	57.6243	3.98184	1.15548	3.44605	0.000568854	0.00899151	Upregulated	protein_coding
ENSG00000278662.6	12.5688	6.56341	2.16391	3.03312	0.00242035	0.0263471	Upregulated	protein_coding
ENSG00000278845.5	148.348	4.69685	1.18803	3.95346	7.7028e-05	0.00190511	Upregulated	protein_coding
ENSG00000283199.3	120.673	7.77738	2.05965	3.77606	0.000159327	0.00337025	Upregulated	protein_coding
ENSG00000283208.2	179.189	10.2132	1.89771	5.38183	7.37328e-08	8.83621e-06	Upregulated	protein_coding
ENSG00000283361.3	29.0282	3.76335	1.21716	3.09193	0.00198863	0.0229453	Upregulated	protein_coding
ENSG00000283378.1	23.8575	6.97312	1.99785	3.49031	0.000482459	0.00797495	Upregulated	protein_coding
ENSG00000283526.2	22.7454	6.7173	2.0584	3.26336	0.00110101	0.0146766	Upregulated	protein_coding
ENSG00000283787.2	285.274	10.7991	2.04436	5.28237	1.27524e-07	1.31334e-05	Upregulated	protein_coding
ENSG00000284484.1	23.2803	7.02629	2.09662	3.35124	0.0008045	0.0116606	Upregulated	protein_coding
ENSG00000284690.3	17.6705	6.52393	2.35034	2.77573	0.00550772	0.0492074	Upregulated	protein_coding
ENSG00000284770.2	67.4804	4.51464	1.37916	3.27347	0.00106235	0.0143415	Upregulated	protein_coding
ENSG00000284862.3	33.3341	6.00701	1.83482	3.2739	0.00106073	0.0143411	Upregulated	protein_coding
ENSG00000284931.1	249.287	8.39587	2.57286	3.26324	0.00110146	0.0146766	Upregulated	protein_coding
ENSG00000285077.4	64.1618	7.33125	2.02653	3.61764	0.000297296	0.00548127	Upregulated	protein_coding
ENSG00000285868.1	103.891	4.11807	0.91443	4.50343	6.68651e-06	0.000296784	Upregulated	protein_coding
ENSG00000286106.3	41.3815	8.08975	1.95929	4.12891	3.64481e-05	0.00105836	Upregulated	protein_coding
ENSG00000289721.1	48.2345	5.78646	1.60343	3.6088	0.000307621	0.00563605	Upregulated	protein_coding
ENSG00000292277.1	29.8586	2.5974	0.920413	2.82199	0.00477268	0.0443695	Upregulated	protein_coding
Differential expression analysis was performed using DESeq2 with minimum read count filtering (<10 reads per gene excluded). Genes were considered significant at FDR < 0.05 and |log2FC| > 1.0.
Abbreviations: u-BMF, genetically undefined bone marrow failure; Ctrl, control; log2FC, log2 fold change; FDR, false discovery rate.

## Sheet: sTable 6
Supplementary Table 6. Integrated functional enrichment analysis of upregulated DE-mRNAs in g-BMF and u-BMF.
GO	Description	g-BMF_down	g-BMF_up	u-BMF_down	u-BMF_up
R-HSA-198933	Immunoregulatory interactions between a Lymphoid and a non-Lymphoid cell	0	-14.8223	0	-14.4922
GO:0001910	regulation of leukocyte mediated cytotoxicity	0	-10.5142	0	-11.1428
M5950	HALLMARK ALLOGRAFT REJECTION	0	-14.4479	0	-14.4019
GO:0050778	positive regulation of immune response	0	-10.2218	0	-11.8964
WP5287	17q12 copy number variation syndrome	0	-13.0214	0	-13.8672
hsa04612	Antigen processing and presentation	0	-14.7893	0	-16.4584
GO:0001775	cell activation	0	-8.01459	-5.71734	-7.92396
GO:0045088	regulation of innate immune response	-3.00957	-8.08064	-3.71355	-9.94479
GO:0045785	positive regulation of cell adhesion	-3.45343	-7.47996	-3.05454	-6.61588
R-HSA-1280215	Cytokine Signaling in Immune system	-4.62057	-6.40732	-5.71734	-6.17396
R-HSA-1280218	Adaptive Immune System	-3.05732	-14.7773	-2.02448	-14.3014
R-HSA-2262752	Cellular responses to stress	-14.1568	-6.41525	-4.23511	-5.6025
hsa05014	Amyotrophic lateral sclerosis	-7.91238	-4.76679	-2.48504	-4.46819
GO:0005819	spindle	-7.80557	-4.46562	-2.71506	-2.12007
GO:0003712	transcription coregulator activity	-10.679	-2.46193	-2.33013	-2.37501
R-HSA-1640170	Cell Cycle	-14.8832	-2.75745	-3.47604	-2.94173
GO:0016746	acyltransferase activity	-8.17254	-6.61333	0	-3.51395
GO:0006259	DNA metabolic process	-11.3503	-4.67873	0	-2.50821
R-HSA-8953854	Metabolism of RNA	-5.90617	-14.684	0	-12.1812
GO:0006338	chromatin remodeling	-13.2675	0	0	0
Pathway enrichment analysis was performed using Metascape based on upregulated DE-mRNAs in each comparison group. Enrichment significance is reported as P-values for each term.
Abbreviations: DE, differentially expressed; g-BMF, genetically defined bone marrow failure; u-BMF, genetically undefined bone marrow failure.

## Sheet: sTable 7
Supplementary Table 7. Differentially expressed lncRNAs in g-BMF compared with Ctrl.
EnsemblID	baseMean	log2FoldChange	lfcSE	stat	pvalue	padj	significance	gene_type
ENSG00000253628.2	4.48487	-6.25518	2.25196	-2.77766	0.00547521	0.0392053	Downregulated	lncRNA
ENSG00000260070.1	4.54718	5.76846	2.08205	2.77057	0.00559583	0.0397185	Upregulated	lncRNA
ENSG00000279261.2	4.67608	-6.48426	2.16693	-2.99237	0.00276822	0.0246568	Downregulated	lncRNA
ENSG00000231509.1	4.82232	6.07997	2.25052	2.70158	0.00690109	0.0456695	Upregulated	lncRNA
ENSG00000288780.1	4.84102	-6.69323	2.25633	-2.96642	0.00301284	0.0261639	Downregulated	lncRNA
ENSG00000261736.1	5.02114	-6.22555	2.23262	-2.78846	0.00529597	0.0381915	Downregulated	lncRNA
ENSG00000289367.2	5.05232	-5.88665	2.02731	-2.90367	0.00368815	0.0299194	Downregulated	lncRNA
ENSG00000254946.2	5.3229	6.63406	2.4099	2.75284	0.00590802	0.0412079	Upregulated	lncRNA
ENSG00000290121.1	5.53382	5.90374	2.195	2.68963	0.00715321	0.0466702	Upregulated	lncRNA
ENSG00000231840.2	5.5901	-5.36913	1.86559	-2.87798	0.00400235	0.0316313	Downregulated	lncRNA
ENSG00000287155.1	5.67746	6.38405	2.40288	2.65684	0.00788772	0.0499411	Upregulated	lncRNA
ENSG00000272030.1	5.86257	-6.34858	2.26364	-2.80459	0.00503805	0.0368557	Downregulated	lncRNA
ENSG00000239791.2	5.90437	-6.75214	2.41893	-2.79137	0.00524857	0.0379223	Downregulated	lncRNA
ENSG00000256250.1	5.9792	6.07976	2.19375	2.77139	0.00558167	0.0396767	Upregulated	lncRNA
ENSG00000272249.1	6.20378	6.09217	2.26225	2.69296	0.007082	0.046402	Upregulated	lncRNA
ENSG00000279467.1	6.36576	6.20512	2.30839	2.68807	0.0071866	0.0467954	Upregulated	lncRNA
ENSG00000226193.1	6.41522	6.83453	2.41921	2.8251	0.00472655	0.0355537	Upregulated	lncRNA
ENSG00000289182.1	6.77038	6.55205	2.26796	2.88896	0.00386515	0.0308148	Upregulated	lncRNA
ENSG00000244998.1	7.02209	6.4046	2.40636	2.66153	0.00777866	0.0494777	Upregulated	lncRNA
ENSG00000290199.1	7.14897	6.14883	2.30268	2.6703	0.00757846	0.048591	Upregulated	lncRNA
ENSG00000282996.1	7.17987	6.21215	2.08287	2.9825	0.00285908	0.0251937	Upregulated	lncRNA
ENSG00000253295.2	7.31018	6.12244	2.24711	2.72458	0.00643827	0.0436138	Upregulated	lncRNA
ENSG00000249175.1	7.33286	6.35216	2.09671	3.02959	0.00244888	0.02252	Upregulated	lncRNA
ENSG00000254812.3	7.43329	6.55081	2.28324	2.86909	0.00411657	0.0322092	Upregulated	lncRNA
ENSG00000290995.1	7.50492	6.75662	2.50408	2.69825	0.0069705	0.0459558	Upregulated	lncRNA
ENSG00000233077.2	7.67239	6.92232	2.59816	2.66431	0.00771454	0.0491765	Upregulated	lncRNA
ENSG00000254484.1	7.81718	6.44257	2.32969	2.76542	0.00568497	0.0400949	Upregulated	lncRNA
ENSG00000253302.1	7.93123	6.08169	2.20169	2.76228	0.00573987	0.0403551	Upregulated	lncRNA
ENSG00000249417.1	8.04847	5.76093	1.97156	2.92202	0.00347769	0.0287235	Upregulated	lncRNA
ENSG00000255153.1	8.09297	6.5946	2.03026	3.24815	0.00116159	0.0133613	Upregulated	lncRNA
ENSG00000250295.6	8.2484	6.45799	2.16656	2.98076	0.00287529	0.0253028	Upregulated	lncRNA
ENSG00000259499.1	8.286	5.94885	2.20356	2.69966	0.00694114	0.045831	Upregulated	lncRNA
ENSG00000253574.5	8.29544	6.32103	2.13958	2.95433	0.00313344	0.0268486	Upregulated	lncRNA
ENSG00000248192.1	8.30348	6.83202	2.28378	2.99154	0.00277575	0.0247072	Upregulated	lncRNA
ENSG00000287518.1	8.32396	6.38726	2.37603	2.6882	0.00718376	0.0467885	Upregulated	lncRNA
ENSG00000287514.2	8.34255	6.56894	2.22509	2.95221	0.00315509	0.0269465	Upregulated	lncRNA
ENSG00000241577.1	8.59339	6.68174	2.39443	2.79054	0.00526204	0.0379988	Upregulated	lncRNA
ENSG00000265739.1	8.61059	6.41178	2.22737	2.87864	0.00399396	0.0315839	Upregulated	lncRNA
ENSG00000275185.1	8.69925	-8.29934	2.29058	-3.62326	0.000290918	0.00479302	Downregulated	lncRNA
ENSG00000253573.2	8.70698	6.88465	2.59041	2.65775	0.00786646	0.0498556	Upregulated	lncRNA
ENSG00000234308.3	8.71056	6.3327	2.13525	2.96579	0.00301905	0.026192	Upregulated	lncRNA
ENSG00000235122.4	8.75034	7.08826	2.22472	3.18614	0.00144183	0.0154089	Upregulated	lncRNA
ENSG00000235731.3	8.75231	6.6723	2.34168	2.84937	0.00438064	0.0337155	Upregulated	lncRNA
ENSG00000277170.1	8.77528	6.28695	2.04004	3.08178	0.00205769	0.0199193	Upregulated	lncRNA
ENSG00000260350.1	8.78223	-6.36781	2.24302	-2.83895	0.00452623	0.0344697	Downregulated	lncRNA
ENSG00000249412.1	8.79645	5.90414	2.19293	2.69235	0.00709507	0.0464338	Upregulated	lncRNA
ENSG00000285763.1	8.8098	6.44636	2.13114	3.02483	0.00248769	0.0228132	Upregulated	lncRNA
ENSG00000291126.1	8.87554	6.63244	2.39841	2.76535	0.00568613	0.0400949	Upregulated	lncRNA
ENSG00000243055.1	8.90407	6.8132	2.45016	2.78071	0.00542396	0.0388902	Upregulated	lncRNA
ENSG00000281248.1	8.92787	6.73731	2.39375	2.81454	0.00488474	0.0361289	Upregulated	lncRNA
ENSG00000286686.1	8.9903	6.90052	2.23735	3.08424	0.00204071	0.0198317	Upregulated	lncRNA
ENSG00000272752.6	9.0165	-6.71774	1.73511	-3.87165	0.000108102	0.00225304	Downregulated	lncRNA
ENSG00000251330.3	9.04117	6.38635	2.3804	2.68289	0.00729887	0.0473045	Upregulated	lncRNA
ENSG00000267015.1	9.0659	6.63556	2.48277	2.67264	0.0075257	0.0483468	Upregulated	lncRNA
ENSG00000285813.1	9.12138	6.82673	2.23857	3.04959	0.00229154	0.0215311	Upregulated	lncRNA
ENSG00000283036.3	9.18802	6.91	2.17734	3.1736	0.00150562	0.0158846	Upregulated	lncRNA
ENSG00000268764.1	9.19265	6.64294	2.34245	2.8359	0.00456971	0.0347206	Upregulated	lncRNA
ENSG00000260519.2	9.21224	-4.3582	1.37055	-3.17989	0.0014733	0.0156329	Downregulated	lncRNA
ENSG00000229999.6	9.22187	3.89103	1.42076	2.73868	0.00616856	0.0424411	Upregulated	lncRNA
ENSG00000289488.1	9.33427	-2.98293	1.12129	-2.66027	0.00780783	0.0495913	Downregulated	lncRNA
ENSG00000258428.5	9.35735	6.52277	2.16247	3.01635	0.00255834	0.0232488	Upregulated	lncRNA
ENSG00000244491.1	9.36011	-7.8067	2.52653	-3.08989	0.00200234	0.0195628	Downregulated	lncRNA
ENSG00000236581.9	9.45328	6.8411	2.35251	2.908	0.0036375	0.0296215	Upregulated	lncRNA
ENSG00000255340.1	9.51262	6.52291	2.22335	2.93383	0.00334811	0.0279946	Upregulated	lncRNA
ENSG00000250910.8	9.56514	6.76369	2.28886	2.95504	0.00312625	0.0268108	Upregulated	lncRNA
ENSG00000288054.1	9.5722	6.93876	2.21858	3.12757	0.00176258	0.0178526	Upregulated	lncRNA
ENSG00000264031.1	9.58925	6.92373	2.34441	2.95329	0.00314403	0.0269043	Upregulated	lncRNA
ENSG00000240254.2	9.60456	6.74769	2.44034	2.76507	0.00569114	0.0401195	Upregulated	lncRNA
ENSG00000259364.1	9.69422	6.16885	2.27361	2.71324	0.00666297	0.0447223	Upregulated	lncRNA
ENSG00000240571.1	9.70145	5.13325	1.88158	2.72816	0.00636883	0.0432769	Upregulated	lncRNA
ENSG00000261394.1	9.7293	6.17908	2.19389	2.81649	0.00485513	0.0360579	Upregulated	lncRNA
ENSG00000261049.2	9.7647	6.71473	2.43145	2.76161	0.00575171	0.0404168	Upregulated	lncRNA
ENSG00000288935.1	9.77955	6.4963	2.41409	2.691	0.00712385	0.0465709	Upregulated	lncRNA
ENSG00000289975.1	9.8012	6.4351	2.22298	2.89481	0.00379383	0.0304673	Upregulated	lncRNA
ENSG00000267784.1	9.84179	6.15952	2.07177	2.97306	0.00294842	0.0257742	Upregulated	lncRNA
ENSG00000259321.1	9.88197	6.64003	2.0164	3.29302	0.000991181	0.0118495	Upregulated	lncRNA
ENSG00000253197.5	10.0712	5.61644	2.0729	2.70946	0.00673919	0.0450733	Upregulated	lncRNA
ENSG00000236861.6	10.0975	6.21206	2.20714	2.81453	0.00488485	0.0361289	Upregulated	lncRNA
ENSG00000291149.1	10.3201	6.42341	1.90109	3.3788	0.000728023	0.00951157	Upregulated	lncRNA
ENSG00000230046.1	10.3237	6.80782	2.53231	2.68838	0.00718002	0.0467872	Upregulated	lncRNA
ENSG00000258323.1	10.3511	6.19818	2.28145	2.71678	0.00659211	0.0443854	Upregulated	lncRNA
ENSG00000256452.1	10.3897	6.47233	2.3375	2.7689	0.00562452	0.0398145	Upregulated	lncRNA
ENSG00000256271.1	10.4071	7.12792	2.27047	3.1394	0.00169292	0.0172866	Upregulated	lncRNA
ENSG00000291168.1	10.422	6.63388	2.48838	2.66594	0.00767732	0.0490103	Upregulated	lncRNA
ENSG00000289100.1	10.423	5.8364	2.16746	2.69274	0.00708673	0.0464068	Upregulated	lncRNA
ENSG00000289020.1	10.5859	-6.02119	1.82273	-3.30339	0.000955224	0.0115897	Downregulated	lncRNA
ENSG00000287630.1	10.6065	6.23397	2.25567	2.76369	0.00571521	0.0402354	Upregulated	lncRNA
ENSG00000230612.3	10.65	6.21864	2.27665	2.73149	0.00630494	0.042995	Upregulated	lncRNA
ENSG00000274629.1	10.6733	6.93177	2.51747	2.75346	0.00589684	0.0412079	Upregulated	lncRNA
ENSG00000262815.1	10.7017	6.79578	2.40742	2.82285	0.00475994	0.0356725	Upregulated	lncRNA
ENSG00000253364.2	10.7213	6.76916	2.54601	2.65874	0.00784337	0.049741	Upregulated	lncRNA
ENSG00000259103.2	10.7247	6.68536	2.18935	3.05358	0.00226131	0.0213461	Upregulated	lncRNA
ENSG00000260664.4	10.7278	6.78502	2.08875	3.24836	0.00116071	0.0133575	Upregulated	lncRNA
ENSG00000291254.1	10.8021	6.06497	2.26218	2.68102	0.00733978	0.0474819	Upregulated	lncRNA
ENSG00000287713.1	10.9007	6.96757	2.33982	2.97783	0.00290301	0.0254872	Upregulated	lncRNA
ENSG00000243795.1	10.9486	7.02524	2.50593	2.80345	0.00505597	0.0369357	Upregulated	lncRNA
ENSG00000287106.1	10.9586	7.16496	2.36393	3.03095	0.00243787	0.0224422	Upregulated	lncRNA
ENSG00000259351.1	10.9943	6.87142	2.1148	3.2492	0.0011573	0.0133357	Upregulated	lncRNA
ENSG00000282917.4	10.9971	7.20886	2.20976	3.26228	0.0011052	0.0128534	Upregulated	lncRNA
ENSG00000229981.8	11.0256	7.36861	2.4579	2.99793	0.00271819	0.0243097	Upregulated	lncRNA
ENSG00000229111.1	11.0294	6.1813	2.15905	2.86297	0.00419694	0.0326703	Upregulated	lncRNA
ENSG00000237126.8	11.0602	7.01774	2.40188	2.92177	0.00348053	0.0287302	Upregulated	lncRNA
ENSG00000182586.9	11.1832	5.47472	1.80552	3.03221	0.00242771	0.0224113	Upregulated	lncRNA
ENSG00000284726.1	11.1952	6.79178	2.20102	3.08574	0.00203048	0.0197614	Upregulated	lncRNA
ENSG00000277299.1	11.2129	3.26512	1.03451	3.15618	0.0015985	0.0165858	Upregulated	lncRNA
ENSG00000286982.1	11.2901	7.14538	2.06286	3.46383	0.000532542	0.00757238	Upregulated	lncRNA
ENSG00000231609.7	11.3232	6.31582	2.21479	2.85165	0.00434925	0.0335875	Upregulated	lncRNA
ENSG00000275139.1	11.4813	6.67029	2.25386	2.95949	0.00308145	0.0265498	Upregulated	lncRNA
ENSG00000254254.7	11.4842	7.34714	2.29196	3.20562	0.00134772	0.0147327	Upregulated	lncRNA
ENSG00000229990.3	11.5545	6.70913	2.49957	2.68412	0.00727218	0.0472244	Upregulated	lncRNA
ENSG00000261170.2	11.5621	5.01545	1.78285	2.81316	0.00490569	0.0362165	Upregulated	lncRNA
ENSG00000238142.4	11.5828	6.02554	2.18831	2.75352	0.00589586	0.0412079	Upregulated	lncRNA
ENSG00000227945.1	11.6054	7.03598	2.50156	2.81264	0.00491373	0.0362481	Upregulated	lncRNA
ENSG00000230806.1	11.6116	6.67076	2.29397	2.90796	0.00363796	0.0296215	Upregulated	lncRNA
ENSG00000276863.1	11.619	7.23806	1.84639	3.9201	8.85112e-05	0.00192286	Upregulated	lncRNA
ENSG00000267122.1	11.6597	6.60631	2.30922	2.86084	0.00422514	0.0328504	Upregulated	lncRNA
ENSG00000289830.1	11.665	-4.53168	1.68165	-2.69478	0.00704348	0.0462819	Downregulated	lncRNA
ENSG00000290882.1	11.6876	-8.63544	2.01436	-4.28694	1.81152e-05	0.000592429	Downregulated	lncRNA
ENSG00000224157.1	11.7084	6.52809	1.96415	3.32362	0.000888567	0.0109875	Upregulated	lncRNA
ENSG00000229105.1	11.7165	7.12007	2.59794	2.74066	0.00613167	0.0422644	Upregulated	lncRNA
ENSG00000259463.1	11.7801	6.82234	2.17015	3.14372	0.00166815	0.0171131	Upregulated	lncRNA
ENSG00000265656.1	11.8079	6.58728	2.22104	2.96586	0.00301842	0.026192	Upregulated	lncRNA
ENSG00000288942.1	11.8246	-6.71813	1.93831	-3.46598	0.000528304	0.0075243	Downregulated	lncRNA
ENSG00000248935.1	11.866	6.06919	2.25454	2.69199	0.00710277	0.0464577	Upregulated	lncRNA
ENSG00000290851.1	11.9805	7.44541	2.30899	3.22453	0.00126178	0.0141081	Upregulated	lncRNA
ENSG00000250893.1	11.9885	7.21448	2.08621	3.45817	0.000543856	0.00770487	Upregulated	lncRNA
ENSG00000285692.1	12.056	6.4942	2.14898	3.02199	0.00251117	0.0229965	Upregulated	lncRNA
ENSG00000179447.2	12.1017	6.64555	2.34611	2.83258	0.00461735	0.0349602	Upregulated	lncRNA
ENSG00000288097.1	12.1216	7.12536	2.26718	3.14283	0.00167325	0.017141	Upregulated	lncRNA
ENSG00000231364.3	12.2095	7.4575	2.44465	3.05053	0.00228435	0.0214824	Upregulated	lncRNA
ENSG00000260621.1	12.2164	6.57017	2.24847	2.92206	0.00347722	0.0287235	Upregulated	lncRNA
ENSG00000235781.1	12.2322	6.87044	2.2253	3.08741	0.00201906	0.0196689	Upregulated	lncRNA
ENSG00000285761.1	12.2548	7.33323	2.38539	3.07423	0.00211048	0.020278	Upregulated	lncRNA
ENSG00000260647.1	12.2583	6.80748	2.19749	3.09784	0.00194939	0.0192138	Upregulated	lncRNA
ENSG00000223576.2	12.2824	6.23167	2.32391	2.68155	0.00732827	0.04746	Upregulated	lncRNA
ENSG00000254815.6	12.2928	4.86862	1.72979	2.81457	0.00488425	0.0361289	Upregulated	lncRNA
ENSG00000285619.1	12.3079	6.89963	2.41752	2.85401	0.00431716	0.0333984	Upregulated	lncRNA
ENSG00000287077.1	12.3303	6.517	2.24802	2.89899	0.00374367	0.0302211	Upregulated	lncRNA
ENSG00000230010.2	12.3504	6.84905	2.49252	2.74785	0.00599882	0.0416317	Upregulated	lncRNA
ENSG00000242767.1	12.3885	6.73641	2.26614	2.97264	0.00295254	0.0257905	Upregulated	lncRNA
ENSG00000247473.2	12.4167	6.98659	2.15981	3.23482	0.00121719	0.0137823	Upregulated	lncRNA
ENSG00000259792.1	12.451	6.641	2.15916	3.07574	0.00209981	0.020205	Upregulated	lncRNA
ENSG00000284902.1	12.5157	6.9913	2.12272	3.29356	0.000989259	0.0118452	Upregulated	lncRNA
ENSG00000265313.8	12.5244	6.84285	2.48537	2.75326	0.00590056	0.0412079	Upregulated	lncRNA
ENSG00000287649.1	12.5895	6.93116	2.56486	2.70235	0.00688503	0.0456147	Upregulated	lncRNA
ENSG00000230498.3	12.5955	7.30572	2.37074	3.08161	0.00205881	0.0199195	Upregulated	lncRNA
ENSG00000286899.1	12.677	7.03446	2.39362	2.93884	0.00329439	0.0277143	Upregulated	lncRNA
ENSG00000250015.1	12.8162	6.52757	2.44508	2.66968	0.00759243	0.048645	Upregulated	lncRNA
ENSG00000223842.1	12.8183	7.68597	2.2747	3.37889	0.000727778	0.00951157	Upregulated	lncRNA
ENSG00000286429.1	12.8841	7.29615	2.33091	3.13017	0.00174703	0.0177224	Upregulated	lncRNA
ENSG00000275120.3	12.895	6.45575	1.90474	3.38931	0.000700677	0.00923206	Upregulated	lncRNA
ENSG00000269155.2	12.9176	-7.44617	1.80212	-4.13189	3.59798e-05	0.000983014	Downregulated	lncRNA
ENSG00000288096.1	12.9234	5.98199	1.70481	3.50888	0.000449991	0.00672564	Upregulated	lncRNA
ENSG00000230894.2	12.9978	6.9074	2.4929	2.77083	0.00559135	0.0397027	Upregulated	lncRNA
ENSG00000234136.1	13.0507	6.52971	2.45565	2.65906	0.00783602	0.0497224	Upregulated	lncRNA
ENSG00000290816.1	13.1643	6.88339	2.33436	2.94872	0.0031909	0.0271469	Upregulated	lncRNA
ENSG00000254397.1	13.2194	6.76584	2.04627	3.30642	0.000944957	0.0114969	Upregulated	lncRNA
ENSG00000233044.1	13.2204	6.43171	2.31992	2.77239	0.00556471	0.0396194	Upregulated	lncRNA
ENSG00000255421.1	13.2258	6.76347	2.25711	2.99652	0.00273085	0.0244023	Upregulated	lncRNA
ENSG00000228369.2	13.2305	5.9849	2.25198	2.65762	0.00786947	0.0498564	Upregulated	lncRNA
ENSG00000287229.1	13.2709	6.79988	2.47003	2.75295	0.0059061	0.0412079	Upregulated	lncRNA
ENSG00000257746.2	13.4194	7.17786	2.55665	2.80752	0.00499242	0.0366236	Upregulated	lncRNA
ENSG00000267649.1	13.4316	5.83867	2.10211	2.77753	0.00547743	0.0392091	Upregulated	lncRNA
ENSG00000215374.6	13.4705	3.94028	1.3724	2.87108	0.00409073	0.0320893	Upregulated	lncRNA
ENSG00000233851.1	13.5176	6.77207	2.48677	2.72324	0.00646452	0.0437291	Upregulated	lncRNA
ENSG00000275178.1	13.5398	7.01417	2.44299	2.87114	0.00408997	0.0320893	Upregulated	lncRNA
ENSG00000288065.1	13.571	6.70861	2.05671	3.26181	0.00110702	0.0128689	Upregulated	lncRNA
ENSG00000259177.1	13.645	6.70032	2.22498	3.01141	0.00260042	0.0234955	Upregulated	lncRNA
ENSG00000287767.1	13.6547	7.05255	2.39659	2.94275	0.00325314	0.0274989	Upregulated	lncRNA
ENSG00000235772.1	13.6578	6.14893	2.25438	2.72755	0.00638066	0.0433237	Upregulated	lncRNA
ENSG00000267033.1	13.7009	7.37492	2.21856	3.3242	0.000886739	0.0109811	Upregulated	lncRNA
ENSG00000288585.1	13.7175	7.55574	2.43904	3.09783	0.00194943	0.0192138	Upregulated	lncRNA
ENSG00000290673.1	13.8359	6.86396	2.53324	2.70955	0.00673736	0.0450725	Upregulated	lncRNA
ENSG00000287690.1	13.8605	6.81383	2.19335	3.10659	0.0018926	0.0187589	Upregulated	lncRNA
ENSG00000224901.1	13.8917	6.25691	2.29071	2.73143	0.00630611	0.042995	Upregulated	lncRNA
ENSG00000250091.3	13.9094	5.16166	1.73503	2.97497	0.0029302	0.025666	Upregulated	lncRNA
ENSG00000236107.10	13.9753	5.81388	1.9773	2.94032	0.00327879	0.0276183	Upregulated	lncRNA
ENSG00000288751.1	14.0027	6.57625	2.37452	2.7695	0.00561417	0.0397897	Upregulated	lncRNA
ENSG00000228809.2	14.0641	6.16538	1.96001	3.14559	0.00165752	0.0170239	Upregulated	lncRNA
ENSG00000244676.5	14.0764	5.79197	2.06298	2.80757	0.00499161	0.0366236	Upregulated	lncRNA
ENSG00000289610.2	14.0835	6.20789	2.28892	2.71215	0.00668477	0.0448304	Upregulated	lncRNA
ENSG00000228352.2	14.2462	6.88765	2.516	2.73754	0.00619003	0.042555	Upregulated	lncRNA
ENSG00000285904.1	14.322	6.10284	2.10382	2.90084	0.00372166	0.0300922	Upregulated	lncRNA
ENSG00000269945.1	14.3338	7.26955	2.08462	3.48723	0.000488053	0.00711699	Upregulated	lncRNA
ENSG00000232978.2	14.3396	7.26077	2.72892	2.66067	0.00779852	0.049556	Upregulated	lncRNA
ENSG00000247624.6	14.4111	6.62014	2.05443	3.22238	0.00127131	0.0141665	Upregulated	lncRNA
ENSG00000285758.2	14.4239	6.88896	2.2662	3.03988	0.00236675	0.0219871	Upregulated	lncRNA
ENSG00000268324.2	14.491	5.84067	2.07624	2.8131	0.00490671	0.0362165	Upregulated	lncRNA
ENSG00000291258.1	14.7043	7.16828	2.21782	3.23213	0.0012287	0.0138676	Upregulated	lncRNA
ENSG00000232949.2	14.7393	6.05966	1.99625	3.03552	0.00240122	0.0222056	Upregulated	lncRNA
ENSG00000262728.6	14.7402	7.06191	2.55179	2.76744	0.00564985	0.0399459	Upregulated	lncRNA
ENSG00000240549.2	14.7451	6.9127	2.15577	3.2066	0.00134314	0.014718	Upregulated	lncRNA
ENSG00000285639.1	14.9338	7.54165	2.4159	3.12168	0.00179824	0.0181233	Upregulated	lncRNA
ENSG00000269836.1	14.9351	6.2454	2.05457	3.03976	0.00236769	0.0219881	Upregulated	lncRNA
ENSG00000269246.2	14.952	6.5036	2.40348	2.70591	0.00681175	0.0452714	Upregulated	lncRNA
ENSG00000237986.4	15.0032	7.39549	2.49836	2.96014	0.00307498	0.0265201	Upregulated	lncRNA
ENSG00000225408.1	15.0422	5.801	1.77478	3.26858	0.00108088	0.0126207	Upregulated	lncRNA
ENSG00000283538.3	15.0763	5.4846	2.05165	2.67326	0.00751177	0.0482925	Upregulated	lncRNA
ENSG00000237993.1	15.1313	7.02144	2.2299	3.14877	0.00163957	0.016906	Upregulated	lncRNA
ENSG00000253875.2	15.1385	6.90882	1.97885	3.49133	0.000480619	0.00705935	Upregulated	lncRNA
ENSG00000233930.4	15.195	6.54052	2.26872	2.88291	0.00394024	0.0312717	Upregulated	lncRNA
ENSG00000285603.1	15.2041	7.12506	2.15729	3.30278	0.0009573	0.0116072	Upregulated	lncRNA
ENSG00000266541.1	15.2393	7.46182	2.20752	3.38018	0.000724382	0.00947808	Upregulated	lncRNA
ENSG00000237851.1	15.3522	7.20819	2.18512	3.29876	0.000971128	0.0116966	Upregulated	lncRNA
ENSG00000270184.1	15.3896	7.2075	2.47104	2.91678	0.00353662	0.0290859	Upregulated	lncRNA
ENSG00000231050.3	15.4066	-4.08666	1.21421	-3.36568	0.000763555	0.00983346	Downregulated	lncRNA
ENSG00000287087.1	15.4163	6.78786	2.09988	3.23249	0.00122715	0.013856	Upregulated	lncRNA
ENSG00000263924.1	15.4604	7.18318	2.18775	3.28337	0.00102574	0.0121435	Upregulated	lncRNA
ENSG00000225602.5	15.4788	6.71351	2.08164	3.22511	0.00125924	0.014097	Upregulated	lncRNA
ENSG00000234393.1	15.5552	6.65699	2.32302	2.86567	0.00416134	0.0324501	Upregulated	lncRNA
ENSG00000290590.1	15.5699	6.96026	2.37124	2.93528	0.00333249	0.0279102	Upregulated	lncRNA
ENSG00000236003.1	15.5973	7.05471	2.50136	2.82034	0.00479722	0.0358094	Upregulated	lncRNA
ENSG00000228925.1	15.6058	7.30952	2.18543	3.34466	0.000823847	0.0103828	Upregulated	lncRNA
ENSG00000244701.1	15.614	7.01293	2.13916	3.27835	0.00104416	0.0122953	Upregulated	lncRNA
ENSG00000267501.1	15.6241	6.64206	2.29394	2.89548	0.00378585	0.0304298	Upregulated	lncRNA
ENSG00000287005.1	15.6523	5.46407	1.74111	3.13827	0.0016995	0.0173335	Upregulated	lncRNA
ENSG00000229487.1	15.7249	7.41113	2.18711	3.38856	0.000702611	0.00924829	Upregulated	lncRNA
ENSG00000260733.1	15.8498	6.93182	2.51822	2.75267	0.00591113	0.0412079	Upregulated	lncRNA
ENSG00000270110.2	15.8645	6.75891	2.25701	2.99462	0.00274785	0.0245085	Upregulated	lncRNA
ENSG00000227518.5	15.9041	6.61735	2.07628	3.18711	0.001437	0.0153885	Upregulated	lncRNA
ENSG00000263089.1	15.949	7.02858	2.46883	2.84693	0.00441432	0.033862	Upregulated	lncRNA
ENSG00000258837.1	15.954	6.51541	2.0152	3.23314	0.00122438	0.0138366	Upregulated	lncRNA
ENSG00000235837.1	16.0686	7.57828	2.50994	3.01931	0.00253354	0.0231291	Upregulated	lncRNA
ENSG00000266717.1	16.1082	7.22418	2.02165	3.5734	0.000352371	0.00554642	Upregulated	lncRNA
ENSG00000286302.1	16.16	6.11503	2.26372	2.70131	0.00690665	0.0456834	Upregulated	lncRNA
ENSG00000290100.1	16.1751	4.0981	1.34115	3.05566	0.00224565	0.0212384	Upregulated	lncRNA
ENSG00000205537.2	16.2175	7.00236	2.09715	3.33898	0.000840858	0.0105479	Upregulated	lncRNA
ENSG00000287691.1	16.2684	6.94222	2.07477	3.34602	0.00081981	0.0103467	Upregulated	lncRNA
ENSG00000266896.1	16.2842	7.16915	1.95458	3.66787	0.000244581	0.00422014	Upregulated	lncRNA
ENSG00000259474.1	16.3231	6.27094	2.29494	2.73251	0.0062854	0.0429757	Upregulated	lncRNA
ENSG00000225798.1	16.352	3.97338	1.43647	2.76608	0.00567354	0.0400383	Upregulated	lncRNA
ENSG00000266696.1	16.3821	6.80205	2.3388	2.90835	0.00363342	0.0296029	Upregulated	lncRNA
ENSG00000286608.1	16.4262	4.37358	1.60213	2.72986	0.0063362	0.0431284	Upregulated	lncRNA
ENSG00000234506.7	16.4795	3.25325	1.08295	3.00407	0.00266397	0.0239222	Upregulated	lncRNA
ENSG00000286559.1	16.4918	6.87601	2.3886	2.87868	0.00399343	0.0315839	Upregulated	lncRNA
ENSG00000230489.1	16.4978	2.72396	1.01706	2.67827	0.00740037	0.047716	Upregulated	lncRNA
ENSG00000273582.1	16.522	6.53336	2.32083	2.8151	0.00487623	0.0361129	Upregulated	lncRNA
ENSG00000261329.7	16.5295	5.34914	1.96761	2.7186	0.00655589	0.0442186	Upregulated	lncRNA
ENSG00000291105.1	16.5603	4.32385	1.55627	2.77834	0.00546374	0.0391444	Upregulated	lncRNA
ENSG00000241449.6	16.6581	6.95495	2.18685	3.18034	0.001471	0.0156329	Upregulated	lncRNA
ENSG00000269365.2	16.6994	7.11367	1.98931	3.57595	0.000348957	0.00550583	Upregulated	lncRNA
ENSG00000289644.1	16.8113	8.10286	2.26176	3.58254	0.000340266	0.00540755	Upregulated	lncRNA
ENSG00000289070.2	16.857	6.68259	2.2474	2.97347	0.00294454	0.0257574	Upregulated	lncRNA
ENSG00000265394.1	16.8586	6.97927	2.09026	3.33895	0.000840951	0.0105479	Upregulated	lncRNA
ENSG00000286478.1	16.8904	7.21741	2.26524	3.18616	0.00144175	0.0154089	Upregulated	lncRNA
ENSG00000256006.1	16.9348	7.69317	2.26091	3.40268	0.000667282	0.00890779	Upregulated	lncRNA
ENSG00000272077.1	16.9567	5.19167	1.92226	2.70082	0.00691678	0.0457045	Upregulated	lncRNA
ENSG00000287576.1	16.9939	7.17137	1.98137	3.6194	0.000295289	0.00484697	Upregulated	lncRNA
ENSG00000254649.1	17.0162	6.95347	2.25353	3.08558	0.00203152	0.0197642	Upregulated	lncRNA
ENSG00000268056.5	17.0221	5.19781	1.9473	2.66923	0.00760247	0.0486803	Upregulated	lncRNA
ENSG00000264520.1	17.1485	7.00019	2.12433	3.29525	0.000983339	0.0117992	Upregulated	lncRNA
ENSG00000291001.1	17.1957	7.52464	1.90989	3.93982	8.15416e-05	0.00182036	Upregulated	lncRNA
ENSG00000237387.1	17.2381	7.78469	2.15714	3.6088	0.000307618	0.00500948	Upregulated	lncRNA
ENSG00000289485.1	17.2458	7.28725	2.57246	2.8328	0.00461425	0.0349582	Upregulated	lncRNA
ENSG00000235820.1	17.259	7.48743	2.20787	3.39124	0.000695762	0.00919471	Upregulated	lncRNA
ENSG00000245685.9	17.2746	5.51399	1.95787	2.81632	0.0048577	0.0360602	Upregulated	lncRNA
ENSG00000259544.1	17.2783	4.24804	1.18527	3.58402	0.00033835	0.00538683	Upregulated	lncRNA
ENSG00000287945.1	17.308	7.20798	2.48222	2.90384	0.00368614	0.0299123	Upregulated	lncRNA
ENSG00000258851.1	17.4478	7.06546	1.8284	3.86429	0.000111413	0.00229128	Upregulated	lncRNA
ENSG00000243179.1	17.5024	3.99788	1.04688	3.81884	0.000134079	0.00264596	Upregulated	lncRNA
ENSG00000224563.1	17.5171	6.72422	2.29319	2.93225	0.00336516	0.0280925	Upregulated	lncRNA
ENSG00000262339.5	17.6171	7.29665	2.19515	3.32399	0.000887397	0.0109841	Upregulated	lncRNA
ENSG00000260306.1	17.619	6.03228	2.25091	2.67993	0.0073638	0.0475743	Upregulated	lncRNA
ENSG00000262999.1	17.6281	6.8715	2.09563	3.27896	0.00104191	0.0122865	Upregulated	lncRNA
ENSG00000246627.6	17.6441	7.67028	2.73107	2.80852	0.00497691	0.0365505	Upregulated	lncRNA
ENSG00000260536.1	17.772	6.95198	2.19117	3.17272	0.00151018	0.01592	Upregulated	lncRNA
ENSG00000275910.1	17.8593	6.95409	2.31028	3.01006	0.00261196	0.0235548	Upregulated	lncRNA
ENSG00000249870.1	17.896	7.07349	1.97978	3.57287	0.000353087	0.00555439	Upregulated	lncRNA
ENSG00000255121.2	17.9055	6.2105	2.00489	3.09768	0.00195044	0.0192165	Upregulated	lncRNA
ENSG00000254433.1	17.9066	7.52919	2.04521	3.68139	0.000231969	0.00404323	Upregulated	lncRNA
ENSG00000267924.1	17.9276	7.65417	2.23222	3.42895	0.000605912	0.00832458	Upregulated	lncRNA
ENSG00000224101.1	17.9609	7.28209	2.08978	3.48462	0.000492834	0.00716688	Upregulated	lncRNA
ENSG00000250365.7	17.9933	5.55602	1.88736	2.9438	0.00324209	0.0274495	Upregulated	lncRNA
ENSG00000234915.1	18.0452	3.93788	1.42435	2.76469	0.00569769	0.0401442	Upregulated	lncRNA
ENSG00000288742.2	18.0637	7.48529	2.40278	3.11527	0.00183778	0.0183743	Upregulated	lncRNA
ENSG00000285803.1	18.093	7.533	2.28085	3.30271	0.000957547	0.0116072	Upregulated	lncRNA
ENSG00000254756.1	18.1561	6.17775	1.9369	3.18951	0.00142516	0.0153054	Upregulated	lncRNA
ENSG00000287427.1	18.1774	7.84733	2.15903	3.63467	0.000278342	0.00462412	Upregulated	lncRNA
ENSG00000225632.2	18.2338	3.23836	1.18559	2.73142	0.00630615	0.042995	Upregulated	lncRNA
ENSG00000234185.2	18.2728	7.19041	2.34189	3.07035	0.00213806	0.0204609	Upregulated	lncRNA
ENSG00000225751.2	18.2745	7.52084	2.20241	3.41483	0.000638222	0.00861142	Upregulated	lncRNA
ENSG00000228037.1	18.3379	6.28137	2.06307	3.04467	0.00232935	0.0217443	Upregulated	lncRNA
ENSG00000287299.1	18.4713	6.53864	2.24436	2.91336	0.00357559	0.0293129	Upregulated	lncRNA
ENSG00000277701.5	18.5062	6.72565	2.09009	3.21787	0.00129145	0.0143183	Upregulated	lncRNA
ENSG00000225767.1	18.5932	6.87595	2.23362	3.07839	0.0020812	0.0200698	Upregulated	lncRNA
ENSG00000259294.1	18.644	7.2318	2.23002	3.24294	0.00118304	0.0135084	Upregulated	lncRNA
ENSG00000259863.1	18.6643	5.85479	1.63678	3.57701	0.000347552	0.00548749	Upregulated	lncRNA
ENSG00000280224.1	18.6681	7.18654	2.61075	2.75267	0.00591117	0.0412079	Upregulated	lncRNA
ENSG00000286831.1	18.6842	6.11088	2.04857	2.983	0.00285437	0.0251716	Upregulated	lncRNA
ENSG00000287957.1	18.6911	7.77557	2.11107	3.68323	0.000230296	0.00402369	Upregulated	lncRNA
ENSG00000291225.1	18.7205	-3.6839	1.29307	-2.84895	0.00438639	0.0337163	Downregulated	lncRNA
ENSG00000258380.1	18.7968	6.90054	2.22616	3.09976	0.0019368	0.0191107	Upregulated	lncRNA
ENSG00000228086.1	18.8188	6.16677	2.0177	3.05633	0.00224065	0.0212042	Upregulated	lncRNA
ENSG00000286974.1	18.8195	7.47496	2.47877	3.01559	0.00256482	0.0232739	Upregulated	lncRNA
ENSG00000228677.1	18.8474	5.08616	1.64742	3.08735	0.00201948	0.0196689	Upregulated	lncRNA
ENSG00000229666.2	18.8546	3.29477	1.14782	2.87046	0.00409878	0.0321114	Upregulated	lncRNA
ENSG00000289934.1	18.8634	4.3998	1.28508	3.42375	0.000617631	0.00843712	Upregulated	lncRNA
ENSG00000271730.1	18.8652	5.02046	1.49865	3.34998	0.000808187	0.0102343	Upregulated	lncRNA
ENSG00000261442.1	18.8886	7.4877	2.23396	3.35177	0.000802981	0.0101883	Upregulated	lncRNA
ENSG00000277978.1	18.8938	5.7455	1.96608	2.92231	0.00347442	0.0287157	Upregulated	lncRNA
ENSG00000253270.1	18.9427	7.2184	2.19109	3.29443	0.000986208	0.0118242	Upregulated	lncRNA
ENSG00000224490.5	18.9808	7.42115	2.12685	3.48927	0.000484336	0.00709116	Upregulated	lncRNA
ENSG00000267734.1	18.9965	7.43372	2.25233	3.30045	0.000965294	0.0116529	Upregulated	lncRNA
ENSG00000259202.1	19.0014	6.83238	2.39048	2.85816	0.00426103	0.0330612	Upregulated	lncRNA
ENSG00000287613.1	19.1475	7.79218	2.09129	3.72601	0.000194534	0.00350096	Upregulated	lncRNA
ENSG00000261105.6	19.1702	5.99251	2.0089	2.98298	0.00285461	0.0251716	Upregulated	lncRNA
ENSG00000286722.1	19.2267	7.41406	2.3314	3.18009	0.00147228	0.0156329	Upregulated	lncRNA
ENSG00000227508.6	19.2293	3.60555	1.26036	2.86072	0.00422674	0.0328532	Upregulated	lncRNA
ENSG00000290095.1	19.2601	7.51792	2.48357	3.02706	0.00246946	0.0226618	Upregulated	lncRNA
ENSG00000233613.5	19.2801	6.61548	2.36993	2.79143	0.00524759	0.0379223	Upregulated	lncRNA
ENSG00000287927.1	19.3132	6.45648	2.24375	2.87755	0.00400779	0.0316432	Upregulated	lncRNA
ENSG00000223646.2	19.3915	5.45463	1.78741	3.0517	0.00227552	0.0214417	Upregulated	lncRNA
ENSG00000235669.1	19.4239	7.47779	2.74544	2.72371	0.00645524	0.0436951	Upregulated	lncRNA
ENSG00000243368.2	19.5069	7.22982	1.89514	3.81492	0.000136224	0.00266879	Upregulated	lncRNA
ENSG00000249028.2	19.5475	7.29904	2.48493	2.93732	0.00331064	0.027819	Upregulated	lncRNA
ENSG00000287044.1	19.5619	5.34626	1.97521	2.70668	0.00679594	0.0452005	Upregulated	lncRNA
ENSG00000261924.1	19.5641	7.498	2.07435	3.61463	0.000300778	0.00491631	Upregulated	lncRNA
ENSG00000236498.1	19.5912	6.75864	2.19844	3.0743	0.00210999	0.020278	Upregulated	lncRNA
ENSG00000277589.1	19.637	7.36807	2.01575	3.65525	0.000256927	0.00436743	Upregulated	lncRNA
ENSG00000232342.7	19.8557	7.43792	2.11468	3.51728	0.000435991	0.00655354	Upregulated	lncRNA
ENSG00000286411.1	19.917	6.7064	2.22149	3.01887	0.00253716	0.0231399	Upregulated	lncRNA
ENSG00000260635.1	19.9464	7.57845	2.46432	3.07527	0.0021031	0.0202219	Upregulated	lncRNA
ENSG00000269985.2	20.0549	7.20824	2.05295	3.51116	0.000446158	0.00668076	Upregulated	lncRNA
ENSG00000287965.1	20.0747	7.4528	2.0333	3.66536	0.000246989	0.00424998	Upregulated	lncRNA
ENSG00000231393.1	20.1104	7.1912	1.97773	3.6361	0.000276801	0.00461191	Upregulated	lncRNA
ENSG00000253930.1	20.1334	7.61965	2.16228	3.52389	0.00042526	0.00645109	Upregulated	lncRNA
ENSG00000246889.3	20.1616	7.12878	2.02378	3.5225	0.000427495	0.00646638	Upregulated	lncRNA
ENSG00000251523.1	20.2333	7.01017	2.42508	2.8907	0.00384385	0.0306914	Upregulated	lncRNA
ENSG00000241169.1	20.2889	7.9111	2.38011	3.32384	0.000887883	0.010985	Upregulated	lncRNA
ENSG00000233993.1	20.3727	7.70538	2.51186	3.06761	0.00215781	0.0205888	Upregulated	lncRNA
ENSG00000254208.1	20.4549	4.7114	1.39166	3.38545	0.000710623	0.00933512	Upregulated	lncRNA
ENSG00000267571.1	20.52	7.99437	2.31643	3.45116	0.000558178	0.00785711	Upregulated	lncRNA
ENSG00000228554.1	20.5655	6.9492	2.23185	3.11365	0.00184788	0.0184473	Upregulated	lncRNA
ENSG00000240666.2	20.5726	7.37009	2.09907	3.51112	0.000446228	0.00668076	Upregulated	lncRNA
ENSG00000263624.1	20.5762	7.81994	2.12062	3.68757	0.000226403	0.00397941	Upregulated	lncRNA
ENSG00000268015.1	20.7256	6.76923	2.3167	2.92194	0.00347864	0.0287235	Upregulated	lncRNA
ENSG00000287884.1	20.7316	3.97416	1.44532	2.74969	0.00596524	0.0414861	Upregulated	lncRNA
ENSG00000267934.1	20.7801	8.10176	2.13212	3.79986	0.000144777	0.00278588	Upregulated	lncRNA
ENSG00000263370.1	20.7849	7.80639	2.27035	3.4384	0.000585159	0.00811558	Upregulated	lncRNA
ENSG00000253394.7	21.002	3.02827	0.921237	3.28718	0.00101197	0.0120075	Upregulated	lncRNA
ENSG00000236031.1	21.0122	7.18166	2.48655	2.8882	0.00387454	0.0308338	Upregulated	lncRNA
ENSG00000260051.1	21.0309	6.0037	2.11952	2.83257	0.00461755	0.0349602	Upregulated	lncRNA
ENSG00000232828.1	21.0443	-5.64917	1.73655	-3.25311	0.00114151	0.0131826	Downregulated	lncRNA
ENSG00000231201.1	21.0602	7.88745	2.40682	3.27713	0.0010487	0.0123378	Upregulated	lncRNA
ENSG00000278638.2	21.0962	7.17483	2.21772	3.23523	0.00121545	0.0137823	Upregulated	lncRNA
ENSG00000254231.3	21.1529	2.55869	0.844408	3.03016	0.00244425	0.0224885	Upregulated	lncRNA
ENSG00000291056.1	21.1794	7.65767	1.96209	3.90281	9.50815e-05	0.00203476	Upregulated	lncRNA
ENSG00000231704.7	21.1955	3.65179	1.35708	2.69091	0.00712573	0.0465716	Upregulated	lncRNA
ENSG00000226828.2	21.3303	6.49475	2.01171	3.22848	0.00124451	0.0139802	Upregulated	lncRNA
ENSG00000260744.1	21.3552	7.53523	2.23035	3.37849	0.000728845	0.00951759	Upregulated	lncRNA
ENSG00000255052.5	21.3559	4.28289	1.52962	2.79997	0.00511072	0.037253	Upregulated	lncRNA
ENSG00000264421.1	21.3676	6.65733	2.29443	2.90152	0.00371363	0.0300613	Upregulated	lncRNA
ENSG00000265204.1	21.3715	6.98974	2.36843	2.95121	0.0031653	0.0270075	Upregulated	lncRNA
ENSG00000229154.2	21.4091	6.34912	1.94562	3.26329	0.00110126	0.0128302	Upregulated	lncRNA
ENSG00000230366.9	21.4403	3.06958	1.04905	2.92606	0.00343283	0.0284523	Upregulated	lncRNA
ENSG00000291077.1	21.4869	8.02166	2.15178	3.72793	0.000193061	0.00347919	Upregulated	lncRNA
ENSG00000236234.1	21.5474	6.51573	2.35236	2.76987	0.00560792	0.0397665	Upregulated	lncRNA
ENSG00000203321.2	21.5547	3.23585	1.20568	2.68382	0.00727856	0.0472294	Upregulated	lncRNA
ENSG00000261064.1	21.63	5.97133	2.00112	2.984	0.00284508	0.0251519	Upregulated	lncRNA
ENSG00000287125.1	21.7313	6.23947	2.00518	3.11167	0.0018603	0.0185432	Upregulated	lncRNA
ENSG00000258843.1	21.7675	6.28644	1.89374	3.31959	0.000901497	0.0111013	Upregulated	lncRNA
ENSG00000287647.1	21.813	6.68823	1.99176	3.35794	0.000785258	0.010021	Upregulated	lncRNA
ENSG00000257494.1	21.8285	6.38322	2.33206	2.73716	0.00619717	0.0425712	Upregulated	lncRNA
ENSG00000287237.1	21.8977	5.33444	1.92999	2.76397	0.0057103	0.0402116	Upregulated	lncRNA
ENSG00000241860.7	21.9512	3.10835	1.14001	2.72659	0.00639919	0.043416	Upregulated	lncRNA
ENSG00000255435.7	21.9814	4.3672	1.19691	3.64873	0.000263543	0.00445691	Upregulated	lncRNA
ENSG00000258768.2	22.063	7.56257	2.08549	3.62628	0.00028753	0.00474685	Upregulated	lncRNA
ENSG00000272895.1	22.1729	6.32214	2.14108	2.95278	0.0031493	0.0269232	Upregulated	lncRNA
ENSG00000272449.3	22.2788	6.34694	2.07272	3.06213	0.0021977	0.0208877	Upregulated	lncRNA
ENSG00000287959.1	22.4319	7.14789	2.21253	3.23064	0.00123514	0.0139105	Upregulated	lncRNA
ENSG00000267565.1	22.4484	7.78764	2.12473	3.66523	0.000247116	0.00424998	Upregulated	lncRNA
ENSG00000231616.9	22.484	6.51386	1.93215	3.37131	0.000748112	0.00969074	Upregulated	lncRNA
ENSG00000270083.1	22.487	6.17821	2.24162	2.75613	0.0058489	0.0409469	Upregulated	lncRNA
ENSG00000287580.1	22.4957	7.49461	2.27652	3.29214	0.000994279	0.011867	Upregulated	lncRNA
ENSG00000223901.2	22.5146	6.68231	2.20749	3.02711	0.00246902	0.0226618	Upregulated	lncRNA
ENSG00000263466.1	22.5345	7.39059	2.23364	3.30877	0.000937075	0.0114274	Upregulated	lncRNA
ENSG00000239946.1	22.5703	7.62854	2.04162	3.73651	0.000186589	0.00338337	Upregulated	lncRNA
ENSG00000273369.1	22.5857	3.93985	1.24887	3.15474	0.00160641	0.0166482	Upregulated	lncRNA
ENSG00000226899.1	22.6031	7.33587	2.09107	3.50819	0.000451164	0.00673934	Upregulated	lncRNA
ENSG00000230262.9	22.6447	6.48573	2.1706	2.98799	0.00280816	0.0249116	Upregulated	lncRNA
ENSG00000264924.1	22.6884	7.77834	2.17839	3.57068	0.000356062	0.00558784	Upregulated	lncRNA
ENSG00000290817.1	22.7055	5.75682	2.14792	2.68019	0.00735811	0.0475646	Upregulated	lncRNA
ENSG00000254879.1	22.753	7.69778	2.45197	3.13942	0.00169282	0.0172866	Upregulated	lncRNA
ENSG00000253269.1	22.9121	7.42074	2.50078	2.96737	0.00300355	0.0261176	Upregulated	lncRNA
ENSG00000233665.8	22.9449	3.97054	1.32796	2.98995	0.00279023	0.024805	Upregulated	lncRNA
ENSG00000286849.1	23.0256	8.14972	2.16259	3.76851	0.000164228	0.00307082	Upregulated	lncRNA
ENSG00000289979.1	23.0341	6.74181	2.3083	2.92068	0.00349267	0.0288123	Upregulated	lncRNA
ENSG00000254162.1	23.1664	8.00259	1.85047	4.32462	1.52797e-05	0.000529368	Upregulated	lncRNA
ENSG00000223881.2	23.1666	6.50745	2.40313	2.70791	0.00677089	0.0451442	Upregulated	lncRNA
ENSG00000263477.1	23.1668	7.83506	2.17507	3.60221	0.000315524	0.00509107	Upregulated	lncRNA
ENSG00000253854.1	23.2498	5.76251	1.84516	3.12304	0.00178995	0.0180605	Upregulated	lncRNA
ENSG00000226533.1	23.3106	7.40547	2.51357	2.94619	0.0032171	0.0273432	Upregulated	lncRNA
ENSG00000287727.1	23.365	7.19824	2.08802	3.4474	0.000566014	0.0079293	Upregulated	lncRNA
ENSG00000285675.2	23.3901	7.60128	2.27672	3.33869	0.000841735	0.0105519	Upregulated	lncRNA
ENSG00000250027.1	23.4276	7.9675	2.1903	3.63764	0.000275151	0.00459428	Upregulated	lncRNA
ENSG00000182376.2	23.4456	3.96922	1.33256	2.97864	0.00289527	0.0254277	Upregulated	lncRNA
ENSG00000223946.1	23.5051	8.14356	2.06238	3.94863	7.85998e-05	0.00177878	Upregulated	lncRNA
ENSG00000285865.1	23.5094	5.97704	1.9182	3.11597	0.00183342	0.0183446	Upregulated	lncRNA
ENSG00000275846.1	23.6009	5.64068	1.70058	3.31691	0.000910193	0.0111771	Upregulated	lncRNA
ENSG00000227006.2	23.6204	7.07029	2.47954	2.85145	0.00435204	0.0335993	Upregulated	lncRNA
ENSG00000242440.2	23.6326	7.38075	2.5256	2.92238	0.00347369	0.0287157	Upregulated	lncRNA
ENSG00000246130.1	23.8452	6.60962	1.89637	3.48541	0.000491376	0.00714962	Upregulated	lncRNA
ENSG00000291027.1	23.8559	6.52686	2.19619	2.97191	0.00295957	0.0258282	Upregulated	lncRNA
ENSG00000237286.1	23.862	7.21331	2.10167	3.43217	0.000598767	0.00825653	Upregulated	lncRNA
ENSG00000234484.1	23.8643	6.9603	2.16362	3.21697	0.00129554	0.0143516	Upregulated	lncRNA
ENSG00000260616.6	23.9167	7.45135	2.50128	2.97902	0.00289174	0.0254136	Upregulated	lncRNA
ENSG00000284994.1	23.9301	7.70981	1.99208	3.87024	0.00010873	0.002259	Upregulated	lncRNA
ENSG00000227170.1	23.931	6.02763	2.00043	3.01317	0.00258531	0.0234152	Upregulated	lncRNA
ENSG00000256314.1	23.9987	6.25896	2.15483	2.90462	0.00367704	0.0298476	Upregulated	lncRNA
ENSG00000290047.1	24.0606	7.28912	2.13545	3.41338	0.000641614	0.00862629	Upregulated	lncRNA
ENSG00000249087.9	24.1425	8.05074	2.00193	4.0215	5.78295e-05	0.00140264	Upregulated	lncRNA
ENSG00000282021.1	24.1574	7.43709	2.26203	3.2878	0.00100975	0.0119973	Upregulated	lncRNA
ENSG00000259250.1	24.1695	7.47758	2.06865	3.61472	0.000300668	0.00491631	Upregulated	lncRNA
ENSG00000259475.1	24.2206	6.00229	1.75606	3.41805	0.000630717	0.00852762	Upregulated	lncRNA
ENSG00000286757.4	24.2552	7.40488	2.32899	3.17943	0.00147562	0.0156329	Upregulated	lncRNA
ENSG00000248896.3	24.2691	5.95059	2.14651	2.77221	0.00556774	0.0396203	Upregulated	lncRNA
ENSG00000291182.1	24.2895	5.91277	2.03337	2.90786	0.00363907	0.0296215	Upregulated	lncRNA
ENSG00000234281.5	24.307	7.1503	2.23695	3.19644	0.00139132	0.015084	Upregulated	lncRNA
ENSG00000273245.1	24.3155	7.74608	2.10119	3.68652	0.00022734	0.00398673	Upregulated	lncRNA
ENSG00000289704.1	24.3194	8.35702	2.14819	3.89026	0.000100136	0.00211208	Upregulated	lncRNA
ENSG00000232354.8	24.3386	4.08984	1.18921	3.43914	0.000583563	0.00810196	Upregulated	lncRNA
ENSG00000286907.1	24.4053	7.55681	2.32632	3.24839	0.00116059	0.0133575	Upregulated	lncRNA
ENSG00000264456.1	24.4655	5.86836	1.92485	3.04873	0.00229812	0.0215737	Upregulated	lncRNA
ENSG00000288398.1	24.5314	7.77464	1.95818	3.97034	7.1769e-05	0.00166045	Upregulated	lncRNA
ENSG00000251497.2	24.609	5.26098	1.54723	3.40025	0.000673232	0.00897213	Upregulated	lncRNA
ENSG00000253811.1	24.6333	7.36348	2.38754	3.08413	0.0020415	0.019832	Upregulated	lncRNA
ENSG00000248468.2	24.6871	7.65617	2.1961	3.48625	0.000489834	0.00713163	Upregulated	lncRNA
ENSG00000265908.1	24.6958	6.1147	2.26276	2.70231	0.00688589	0.0456147	Upregulated	lncRNA
ENSG00000262380.1	24.7523	7.82342	2.12337	3.68444	0.000229208	0.00401	Upregulated	lncRNA
ENSG00000279080.1	24.7846	3.59049	1.30426	2.7529	0.00590692	0.0412079	Upregulated	lncRNA
ENSG00000228852.6	24.7917	7.62878	2.23058	3.42009	0.000626004	0.00850314	Upregulated	lncRNA
ENSG00000224746.2	24.8792	7.99195	2.16481	3.69175	0.000222713	0.0039224	Upregulated	lncRNA
ENSG00000236426.5	24.9285	7.05518	2.5956	2.71814	0.00656508	0.0442568	Upregulated	lncRNA
ENSG00000232118.2	24.9341	7.69405	1.98948	3.86736	0.000110018	0.0022699	Upregulated	lncRNA
ENSG00000130600.22	25.0014	8.32859	2.33781	3.56256	0.000367255	0.00573279	Upregulated	lncRNA
ENSG00000286588.1	25.0496	6.90953	2.16782	3.18732	0.00143596	0.0153874	Upregulated	lncRNA
ENSG00000268087.1	25.0831	6.04246	2.1178	2.85318	0.00432841	0.0334658	Upregulated	lncRNA
ENSG00000272406.1	25.1329	7.62395	2.19691	3.4703	0.000519877	0.00745732	Upregulated	lncRNA
ENSG00000244161.1	25.1556	6.23499	2.16537	2.87942	0.00398413	0.031544	Upregulated	lncRNA
ENSG00000261460.1	25.1614	7.00063	2.26072	3.09664	0.00195726	0.0192693	Upregulated	lncRNA
ENSG00000244945.1	25.1807	6.61812	2.02544	3.26749	0.00108504	0.0126636	Upregulated	lncRNA
ENSG00000258515.1	25.2285	7.96237	2.17724	3.6571	0.000255083	0.00434729	Upregulated	lncRNA
ENSG00000276542.1	25.241	6.73057	2.36498	2.84593	0.00442817	0.0339188	Upregulated	lncRNA
ENSG00000257568.1	25.3746	7.7287	2.51947	3.06759	0.00215793	0.0205888	Upregulated	lncRNA
ENSG00000261158.1	25.3882	7.01457	1.86324	3.76472	0.000166733	0.00310056	Upregulated	lncRNA
ENSG00000261216.1	25.4079	7.03521	2.43233	2.89238	0.00382341	0.0305745	Upregulated	lncRNA
ENSG00000259883.2	25.471	7.24156	1.91239	3.78666	0.000152687	0.00290237	Upregulated	lncRNA
ENSG00000290705.1	25.4856	5.83003	2.17285	2.68313	0.00729361	0.0472937	Upregulated	lncRNA
ENSG00000286339.1	25.4883	7.68194	1.9994	3.84212	0.000121974	0.00246558	Upregulated	lncRNA
ENSG00000234650.6	25.5268	7.79011	2.2605	3.44618	0.00056857	0.0079491	Upregulated	lncRNA
ENSG00000231125.2	25.5607	8.38886	2.13452	3.93009	8.49156e-05	0.00187191	Upregulated	lncRNA
ENSG00000253227.2	25.5959	4.16522	1.47611	2.82175	0.0047763	0.035757	Upregulated	lncRNA
ENSG00000263657.1	25.6309	6.4038	1.97393	3.24419	0.00117783	0.013487	Upregulated	lncRNA
ENSG00000291173.1	25.6441	7.01599	2.39592	2.92831	0.00340805	0.0283231	Upregulated	lncRNA
ENSG00000273489.1	25.6948	7.47732	2.27265	3.29013	0.0010014	0.0119195	Upregulated	lncRNA
ENSG00000267006.1	25.7176	8.42167	2.08717	4.03498	5.46069e-05	0.00134045	Upregulated	lncRNA
ENSG00000232684.1	25.7334	7.95386	2.25839	3.52191	0.000428451	0.00647333	Upregulated	lncRNA
ENSG00000254653.1	25.7765	7.67869	2.01325	3.81408	0.00013669	0.00267545	Upregulated	lncRNA
ENSG00000272186.1	25.7814	6.15717	1.90677	3.22911	0.00124177	0.0139553	Upregulated	lncRNA
ENSG00000287191.2	25.8049	8.06502	2.2202	3.63256	0.000280625	0.0046445	Upregulated	lncRNA
ENSG00000287720.1	25.821	5.93679	1.71948	3.45267	0.000555075	0.00782179	Upregulated	lncRNA
ENSG00000234428.2	25.9731	8.00248	2.12889	3.75898	0.000170605	0.00315207	Upregulated	lncRNA
ENSG00000235586.1	26.0112	6.41283	1.95721	3.27651	0.00105097	0.0123551	Upregulated	lncRNA
ENSG00000267344.1	26.0274	7.83508	2.28574	3.42781	0.000608474	0.00834673	Upregulated	lncRNA
ENSG00000286993.1	26.0343	7.92436	1.9509	4.0619	4.86743e-05	0.00123275	Upregulated	lncRNA
ENSG00000286092.1	26.0695	5.62212	1.95145	2.881	0.00396415	0.0314425	Upregulated	lncRNA
ENSG00000214650.3	26.0998	7.24964	2.05879	3.52131	0.000429427	0.00647333	Upregulated	lncRNA
ENSG00000285830.1	26.1104	4.24923	1.44403	2.94262	0.00325449	0.0275015	Upregulated	lncRNA
ENSG00000285921.1	26.1228	5.88386	1.99889	2.94356	0.00324456	0.0274528	Upregulated	lncRNA
ENSG00000272849.1	26.235	6.29485	2.06303	3.05126	0.00227885	0.0214533	Upregulated	lncRNA
ENSG00000265342.1	26.2404	5.92858	2.07206	2.8612	0.00422046	0.0328312	Upregulated	lncRNA
ENSG00000232490.6	26.305	7.41232	2.57581	2.87767	0.00400627	0.0316432	Upregulated	lncRNA
ENSG00000291223.1	26.3314	7.85663	2.49516	3.14875	0.00163972	0.016906	Upregulated	lncRNA
ENSG00000285650.1	26.3454	7.90514	2.56286	3.08449	0.00203898	0.0198222	Upregulated	lncRNA
ENSG00000235138.1	26.4163	7.34046	2.30075	3.19047	0.00142044	0.015277	Upregulated	lncRNA
ENSG00000286894.1	26.4632	7.61715	2.06084	3.69614	0.000218899	0.00386814	Upregulated	lncRNA
ENSG00000267016.1	26.4701	8.05567	2.14253	3.75988	0.000169997	0.00314433	Upregulated	lncRNA
ENSG00000290870.1	26.5536	8.13343	2.22119	3.66174	0.000250507	0.00428038	Upregulated	lncRNA
ENSG00000232940.8	26.6366	7.63301	2.24237	3.40399	0.000664091	0.00887418	Upregulated	lncRNA
ENSG00000249806.1	26.6495	3.47097	1.27761	2.71676	0.00659248	0.0443854	Upregulated	lncRNA
ENSG00000256967.1	26.7397	6.20876	1.99911	3.10576	0.00189789	0.0187971	Upregulated	lncRNA
ENSG00000223374.1	27.0306	7.18209	2.08409	3.44615	0.000568633	0.0079491	Upregulated	lncRNA
ENSG00000231310.3	27.0972	6.20313	1.8167	3.41451	0.000638975	0.00861718	Upregulated	lncRNA
ENSG00000285095.2	27.1067	8.01961	2.02776	3.95491	7.65647e-05	0.0017417	Upregulated	lncRNA
ENSG00000287437.1	27.1898	7.93053	2.15261	3.68414	0.000229472	0.00401195	Upregulated	lncRNA
ENSG00000267638.1	27.3043	6.28084	1.90031	3.30516	0.000949216	0.0115328	Upregulated	lncRNA
ENSG00000251675.1	27.3298	5.85453	1.9272	3.03784	0.00238279	0.0220894	Upregulated	lncRNA
ENSG00000229463.2	27.4262	7.04596	2.28527	3.0832	0.00204786	0.0198718	Upregulated	lncRNA
ENSG00000175604.2	27.5266	8.49079	2.39389	3.54687	0.000389841	0.00602095	Upregulated	lncRNA
ENSG00000227253.3	27.6162	8.24014	2.25262	3.65802	0.000254166	0.00433448	Upregulated	lncRNA
ENSG00000225084.1	27.6715	8.18191	2.30675	3.54694	0.000389737	0.00602095	Upregulated	lncRNA
ENSG00000289237.2	27.6916	7.55611	2.44535	3.08999	0.00200162	0.0195628	Upregulated	lncRNA
ENSG00000236449.2	27.7539	7.74817	1.97658	3.91999	8.85524e-05	0.00192286	Upregulated	lncRNA
ENSG00000225303.2	27.7699	7.71147	2.36117	3.26595	0.00109098	0.0127273	Upregulated	lncRNA
ENSG00000272402.1	27.7849	6.12343	1.90507	3.21427	0.00130775	0.0144445	Upregulated	lncRNA
ENSG00000290099.1	27.8661	6.992	2.11883	3.29993	0.000967083	0.0116638	Upregulated	lncRNA
ENSG00000232754.1	28.0067	6.53242	2.0198	3.2342	0.00121985	0.0138026	Upregulated	lncRNA
ENSG00000289603.1	28.0134	4.21524	1.21299	3.47508	0.000510697	0.00735753	Upregulated	lncRNA
ENSG00000254317.1	28.101	5.13125	1.58391	3.2396	0.00119696	0.0136261	Upregulated	lncRNA
ENSG00000289129.2	28.273	7.1549	2.53938	2.81758	0.00483872	0.0360172	Upregulated	lncRNA
ENSG00000257769.1	28.2782	7.81599	1.97302	3.96143	7.45012e-05	0.00171249	Upregulated	lncRNA
ENSG00000289382.2	28.307	3.7055	1.2279	3.01776	0.00254652	0.0231833	Upregulated	lncRNA
ENSG00000248571.1	28.3777	4.19732	1.42937	2.93648	0.00331963	0.0278555	Upregulated	lncRNA
ENSG00000232162.1	28.3838	6.6043	2.17823	3.03196	0.0024297	0.0224218	Upregulated	lncRNA
ENSG00000268583.2	28.4305	3.72438	1.32273	2.81566	0.00486766	0.0360798	Upregulated	lncRNA
ENSG00000228060.3	28.4385	5.93257	1.86012	3.18934	0.00142596	0.0153076	Upregulated	lncRNA
ENSG00000254865.1	28.5339	8.14391	1.94483	4.18746	2.82088e-05	0.000819983	Upregulated	lncRNA
ENSG00000265218.1	28.5535	6.98624	2.09293	3.33801	0.000843794	0.0105584	Upregulated	lncRNA
ENSG00000289447.2	28.6002	-1.67531	0.625325	-2.67911	0.00738189	0.0476551	Downregulated	lncRNA
ENSG00000273445.1	28.6802	2.65016	0.894398	2.96307	0.00304589	0.0263381	Upregulated	lncRNA
ENSG00000246089.5	28.691	5.19672	1.87387	2.77325	0.00554994	0.0395592	Upregulated	lncRNA
ENSG00000289938.1	28.7574	5.00036	1.45634	3.4335	0.000595834	0.00822757	Upregulated	lncRNA
ENSG00000290434.1	28.8397	8.24329	2.45476	3.35808	0.000784859	0.0100207	Upregulated	lncRNA
ENSG00000237400.1	28.9494	5.98103	1.8415	3.24791	0.00116256	0.0133613	Upregulated	lncRNA
ENSG00000232712.6	29.0916	8.11475	2.00246	4.0524	5.0695e-05	0.00127024	Upregulated	lncRNA
ENSG00000286607.1	29.157	4.3922	1.6262	2.70089	0.00691538	0.0457045	Upregulated	lncRNA
ENSG00000273619.2	29.2503	-2.60249	0.69803	-3.72834	0.000192745	0.00347728	Downregulated	lncRNA
ENSG00000237576.2	29.3062	3.8991	0.900078	4.33196	1.47787e-05	0.000515398	Upregulated	lncRNA
ENSG00000253385.1	29.3589	7.7198	2.31341	3.33697	0.000846958	0.010588	Upregulated	lncRNA
ENSG00000276523.1	29.3852	3.18233	1.08427	2.93501	0.00333538	0.0279255	Upregulated	lncRNA
ENSG00000286918.1	29.4586	4.56324	1.35359	3.37121	0.000748382	0.00969074	Upregulated	lncRNA
ENSG00000279597.1	29.462	7.76494	2.19519	3.53725	0.00040432	0.00620349	Upregulated	lncRNA
ENSG00000257097.1	29.4997	5.78444	1.99268	2.90285	0.00369781	0.0299605	Upregulated	lncRNA
ENSG00000255321.1	29.5218	7.81459	2.029	3.85145	0.000117423	0.00238877	Upregulated	lncRNA
ENSG00000226159.2	29.5295	6.94985	2.22722	3.12041	0.00180598	0.0181805	Upregulated	lncRNA
ENSG00000234945.8	29.5425	5.22194	1.58555	3.29346	0.000989633	0.0118452	Upregulated	lncRNA
ENSG00000272109.2	29.5862	3.06789	0.990007	3.09886	0.00194267	0.0191614	Upregulated	lncRNA
ENSG00000236256.9	29.6668	7.92014	2.17143	3.64742	0.000264885	0.00447099	Upregulated	lncRNA
ENSG00000255801.2	29.815	3.43619	1.04105	3.30071	0.000964419	0.0116477	Upregulated	lncRNA
ENSG00000259277.1	29.8929	8.45227	2.11929	3.98825	6.65614e-05	0.00156165	Upregulated	lncRNA
ENSG00000254538.1	29.9018	5.07237	1.75241	2.89452	0.00379741	0.0304869	Upregulated	lncRNA
ENSG00000285928.1	29.9969	8.26315	1.9858	4.16112	3.16692e-05	0.000896841	Upregulated	lncRNA
ENSG00000257226.2	30.033	8.26894	1.89568	4.362	1.2888e-05	0.000464833	Upregulated	lncRNA
ENSG00000253607.1	30.0451	7.97517	2.48573	3.20838	0.00133483	0.0146515	Upregulated	lncRNA
ENSG00000240591.2	30.0608	1.91339	0.713971	2.67992	0.00736396	0.0475743	Upregulated	lncRNA
ENSG00000228386.2	30.1281	8.35898	2.01692	4.14443	3.40661e-05	0.00094642	Upregulated	lncRNA
ENSG00000287625.1	30.2424	3.07121	1.14229	2.68864	0.0071743	0.0467615	Upregulated	lncRNA
ENSG00000260145.1	30.3482	7.77252	2.27106	3.42241	0.000620677	0.0084482	Upregulated	lncRNA
ENSG00000204949.11	30.4531	5.86365	1.78874	3.27808	0.00104515	0.0123015	Upregulated	lncRNA
ENSG00000286108.1	30.5377	8.26518	2.10697	3.92278	8.75315e-05	0.00190882	Upregulated	lncRNA
ENSG00000264829.1	30.7271	7.82411	2.22771	3.51217	0.000444467	0.00666194	Upregulated	lncRNA
ENSG00000162888.4	30.844	6.85368	2.26896	3.02063	0.0025225	0.0230763	Upregulated	lncRNA
ENSG00000288720.2	30.8742	7.4633	1.85244	4.02889	5.60404e-05	0.00136427	Upregulated	lncRNA
ENSG00000230684.1	30.8926	7.77261	2.28981	3.39443	0.000687718	0.00910682	Upregulated	lncRNA
ENSG00000291259.1	30.9015	5.99556	1.89095	3.17065	0.00152098	0.0159827	Upregulated	lncRNA
ENSG00000269427.1	30.9506	6.13408	2.15624	2.8448	0.00444392	0.0340055	Upregulated	lncRNA
ENSG00000233538.1	30.9767	7.73902	2.11679	3.65602	0.000256164	0.00435726	Upregulated	lncRNA
ENSG00000267234.1	31.0176	6.72746	1.90372	3.53384	0.000409562	0.00626703	Upregulated	lncRNA
ENSG00000286629.1	31.0541	6.96785	2.12663	3.27648	0.00105111	0.0123551	Upregulated	lncRNA
ENSG00000227197.1	31.0825	8.11551	2.5094	3.23404	0.00122052	0.0138026	Upregulated	lncRNA
ENSG00000287408.1	31.136	5.00099	1.53803	3.25155	0.00114776	0.013249	Upregulated	lncRNA
ENSG00000254197.1	31.1445	6.71961	2.41346	2.78423	0.00536555	0.0385475	Upregulated	lncRNA
ENSG00000260194.1	31.1715	7.51009	2.05075	3.66212	0.000250141	0.00427823	Upregulated	lncRNA
ENSG00000234162.3	31.2417	8.72543	2.1383	4.08054	4.49307e-05	0.00116594	Upregulated	lncRNA
ENSG00000286584.3	31.2473	7.96724	2.03285	3.91924	8.88278e-05	0.00192594	Upregulated	lncRNA
ENSG00000273032.3	31.3064	7.12178	2.06859	3.44281	0.000575697	0.00800963	Upregulated	lncRNA
ENSG00000223461.1	31.3541	5.46248	1.85953	2.93755	0.00330813	0.0278121	Upregulated	lncRNA
ENSG00000290864.1	31.4086	7.80853	2.28514	3.4171	0.000632929	0.00855314	Upregulated	lncRNA
ENSG00000290043.1	31.4922	7.94793	2.03889	3.89816	9.69253e-05	0.0020625	Upregulated	lncRNA
ENSG00000286616.1	31.5619	4.51842	1.48226	3.04832	0.00230125	0.0215839	Upregulated	lncRNA
ENSG00000286020.1	31.5848	8.80811	2.23275	3.94496	7.98122e-05	0.00179543	Upregulated	lncRNA
ENSG00000259188.6	31.6448	7.99545	2.2932	3.48659	0.000489218	0.00713004	Upregulated	lncRNA
ENSG00000267882.2	31.6773	8.02245	2.31269	3.46889	0.000522619	0.00748037	Upregulated	lncRNA
ENSG00000269956.2	31.7481	5.95549	1.80735	3.29515	0.000983679	0.0117992	Upregulated	lncRNA
ENSG00000288598.2	31.7648	4.11561	1.38958	2.96177	0.00305878	0.0264323	Upregulated	lncRNA
ENSG00000289582.1	31.7781	3.31644	1.05098	3.15557	0.00160183	0.0166138	Upregulated	lncRNA
ENSG00000224855.5	31.7984	6.83398	2.26489	3.01735	0.00254996	0.0231906	Upregulated	lncRNA
ENSG00000258034.1	32.0176	5.78832	1.69263	3.41973	0.000626837	0.00850423	Upregulated	lncRNA
ENSG00000234263.2	32.1933	6.58155	2.15685	3.05146	0.00227734	0.0214512	Upregulated	lncRNA
ENSG00000255092.1	32.2281	7.4233	2.1045	3.52734	0.000419759	0.00639708	Upregulated	lncRNA
ENSG00000271751.1	32.2856	7.15782	2.17531	3.29048	0.00100016	0.0119143	Upregulated	lncRNA
ENSG00000285676.3	32.2977	4.0054	1.30319	3.07354	0.00211532	0.0203171	Upregulated	lncRNA
ENSG00000250696.5	32.3892	-3.17425	0.792433	-4.00569	6.18358e-05	0.00147806	Downregulated	lncRNA
ENSG00000290945.1	32.3995	3.98465	1.25627	3.1718	0.00151497	0.015945	Upregulated	lncRNA
ENSG00000288820.2	32.4622	6.97633	2.2187	3.14433	0.0016647	0.0170911	Upregulated	lncRNA
ENSG00000248115.1	32.4864	7.88566	1.98298	3.97668	6.9885e-05	0.0016248	Upregulated	lncRNA
ENSG00000268257.2	32.4962	8.13554	2.00039	4.06697	4.76278e-05	0.00121559	Upregulated	lncRNA
ENSG00000286810.1	32.5106	5.30085	1.64711	3.21827	0.00128965	0.0143104	Upregulated	lncRNA
ENSG00000258035.2	32.8881	8.07558	1.93036	4.18345	2.87113e-05	0.000832753	Upregulated	lncRNA
ENSG00000286940.1	32.9143	8.63668	2.22966	3.87354	0.000107265	0.00223795	Upregulated	lncRNA
ENSG00000249236.2	33.0089	5.55337	1.35307	4.10427	4.05586e-05	0.00107795	Upregulated	lncRNA
ENSG00000280011.1	33.0204	8.44373	1.93548	4.36259	1.2853e-05	0.000464833	Upregulated	lncRNA
ENSG00000245748.1	33.0416	4.20604	1.31848	3.19006	0.00142245	0.0152886	Upregulated	lncRNA
ENSG00000272690.6	33.0971	4.73601	1.7622	2.68756	0.00719766	0.0468443	Upregulated	lncRNA
ENSG00000287855.1	33.2188	7.22999	2.10836	3.42921	0.00060535	0.00832458	Upregulated	lncRNA
ENSG00000235880.1	33.2886	3.89898	1.10412	3.5313	0.000413516	0.00632387	Upregulated	lncRNA
ENSG00000260891.1	33.2925	8.28919	2.39017	3.46804	0.00052427	0.00748774	Upregulated	lncRNA
ENSG00000261002.5	33.3018	7.5443	1.99381	3.78386	0.000154416	0.0029268	Upregulated	lncRNA
ENSG00000290119.1	33.3264	5.97916	2.11276	2.83003	0.00465441	0.0351816	Upregulated	lncRNA
[truncated: 580 more rows]

## Sheet: sTable 8
Supplementary Table 8. Differentially expressed lncRNAs in u-BMF compared with Ctrl.
[truncated: 995 more rows]

[truncated: 4 more sheets: sTable 9, sTable 10, sTable 11, all sample CPM]
